# Supplementary material for: Plasma Proteome Responses in Salmonid Fish Following Immunization
Source: Front Immunol. 2020 Oct 8;11:581070. doi: 10.3389/fimmu.2020.581070 (PMC7579410; doi:10.3389/fimmu.2020.581070)
Supplement: Supplementary file 2 [file Table_2.xlsx]

## Sheet: Table S1 - Raw data
Protein IDs	Majority protein IDs	Fasta headers	LFQ intensity 4_d00	LFQ intensity 4_d07	LFQ intensity 4_d14	LFQ intensity 4_d21	LFQ intensity 4_d28	LFQ intensity 4_d35	LFQ intensity 4_d42	LFQ intensity 4_d56	LFQ intensity 4_d70	LFQ intensity 4_d84	LFQ intensity 5_d00	LFQ intensity 5_d07	LFQ intensity 5_d14	LFQ intensity 5_d21	LFQ intensity 5_d28	LFQ intensity 5_d35	LFQ intensity 5_d42	LFQ intensity 5_d56	LFQ intensity 5_d70	LFQ intensity 5_d84	LFQ intensity 6_d00	LFQ intensity 6_d07	LFQ intensity 6_d14	LFQ intensity 6_d21	LFQ intensity 6_d28	LFQ intensity 6_d35	LFQ intensity 6_d42	LFQ intensity 6_d56	LFQ intensity 6_d70	LFQ intensity 6_d84	LFQ intensity 7_d00	LFQ intensity 7_d07	LFQ intensity 7_d14	LFQ intensity 7_d21	LFQ intensity 7_d28	LFQ intensity 7_d35	LFQ intensity 7_d42	LFQ intensity 7_d56	LFQ intensity 7_d70	LFQ intensity 7_d84	LFQ intensity 8_d00	LFQ intensity 8_d07	LFQ intensity 8_d14	LFQ intensity 8_d21	LFQ intensity 8_d28	LFQ intensity 8_d35	LFQ intensity 8_d42
AAA56662.1;AEX30659.1	AAA56662.1	AAA56662.1 IgM heavy chain membrane bound form [Oncorhynchus mykiss]	144350000	163810000	161930000	145460000	116460000	127670000	191200000	292190000	417590000	354390000	53391000	87470000	62876000	79624000	60803000	65432000	170470000	102370000	109920000	148300000	71089000	49616000	58120000	51739000	40132000	96499000	91855000	86518000	80729000	97282000	140970000	119110000	169810000	135090000	114070000	128220000	309030000	221090000	177580000	141870000	123580000	135390000	263070000	215510000	98938000	228320000	243280000
AAA56663.1	AAA56663.1	AAA56663.1 IgM heavy chain membrane bound form [Oncorhynchus mykiss]	28632000	17563000	20024000	21947000	25522000	25368000	31712000	41160000	49815000	45522000	33997000	35182000	35112000	29467000	24382000	37210000	43205000	44865000	52576000	40492000	39927000	47295000	31125000	42101000	26255000	54600000	54672000	46637000	45060000	31826000	47710000	34472000	36100000	30981000	27504000	33888000	59200000	67316000	59650000	46614000	39401000	45820000	48646000	52562000	36980000	58686000	66069000
AAA61753.1;AAA59055.1;CDQ89440.1;ABR26827.1;ABR15694.1;ABH09074.1;ABH09062.1;ABH09048.1;ABR15589.1;ABR26824.1;ABR24165.1;ABR15655.1;ABR26907.1;ABR26901.1;ABR26897.1;ABR15641.1;ABR15627.1;ABR15590.1;ABH09032.1;ABR15643.1	AAA61753.1;AAA59055.1;CDQ89440.1;ABR26827.1;ABR15694.1;ABH09074.1;ABH09062.1;ABH09048.1;ABR15589.1;ABR26824.1;ABR24165.1;ABR15655.1;ABR26907.1;ABR26901.1;ABR26897.1;ABR15641.1;ABR15627.1;ABR15590.1;ABH09032.1;ABR15643.1	AAA61753.1 immunoglobulin IghMV VH5 region, partial [Oncorhynchus mykiss];AAA59055.1 immunoglobulin heavy chain, partial [Oncorhynchus mykiss];CDQ89440.1 unnamed protein product [Oncorhynchus mykiss];ABR26827.1 immunoglobulin mu heavy chain, partial [Oncorhynchus mykiss];ABR15694.1 immunoglobulin mu heavy chain, partial [Oncorhynchus mykiss];ABH09074.1 immunoglobulin mu heavy chain, partial [Onco…	0	0	0	0	0	0	0	0	0	0	0	0	0	0	0	0	0	0	0	0	0	0	0	0	0	0	0	0	0	0	0	0	0	0	0	0	0	0	0	0	0	0	0	0	0	0	0
AAA61752.1	AAA61752.1	AAA61752.1 immunoglobulin IghMV VH4 region, partial [Oncorhynchus mykiss]	0	0	0	0	0	0	13878000	43827000	31202000	26613000	0	0	0	0	0	0	0	0	15150000	16521000	0	0	0	0	0	0	0	0	0	0	0	0	0	0	0	0	0	0	0	0	0	0	0	0	0	0	11246000
AAA61756.1;ABR24184.1	AAA61756.1;ABR24184.1	AAA61756.1 immunoglobulin IghMV VH8 region, partial [Oncorhynchus mykiss];ABR24184.1 immunoglobulin mu heavy chain, partial [Oncorhynchus mykiss]	3893000	0	0	0	4517200	6298300	7045400	10185000	8624900	9871800	21587000	16278000	19885000	15916000	14087000	14284000	19310000	21315000	20697000	19034000	6439900	0	0	4903400	7066800	0	8095300	10450000	8261900	6764200	0	0	0	0	0	0	0	0	0	0	14466000	12104000	9849900	7660500	9292500	9230600	11998000
AAA61757.1;ABR26834.1;ABF50727.1;ABR27142.1;ABR24166.1	AAA61757.1;ABR26834.1;ABF50727.1;ABR27142.1;ABR24166.1	AAA61757.1 immunoglobulin IghMV VH9 region, partial [Oncorhynchus mykiss];ABR26834.1 immunoglobulin mu heavy chain, partial [Oncorhynchus mykiss];ABF50727.1 immunoglobulin mu heavy chain, partial [Oncorhynchus mykiss];ABR27142.1 immunoglobulin mu heavy chain, partial [Oncorhynchus mykiss];ABR24166.1 immunoglobulin mu heavy chain, partial [Oncorhynchus mykiss]	0	0	0	0	0	0	0	25526000	39476000	41632000	0	0	0	0	0	0	0	0	0	0	0	0	0	0	0	0	0	0	0	0	0	4512000	0	0	0	0	0	12189000	21490000	16417000	15931000	16628000	11853000	10395000	11816000	10114000	10568000
AAB27359.2	AAB27359.2	AAB27359.2 IgM heavy chain [Oncorhynchus mykiss]	84342000	102780000	90878000	68569000	90259000	129480000	154660000	188920000	214010000	206130000	138130000	88946000	114560000	96257000	91960000	111680000	158310000	150400000	155510000	135220000	57011000	61574000	43677000	37953000	37145000	47271000	56925000	67085000	59268000	46635000	36983000	39152000	33026000	27205000	28160000	36543000	68824000	77437000	62485000	45911000	156090000	144900000	117750000	109940000	124440000	141770000	154270000
AAB41310.1	AAB41310.1	AAB41310.1 immunoglobulin light chain L2 [Oncorhynchus mykiss]	0	0	0	0	0	0	0	0	0	0	0	0	0	0	0	0	0	0	0	0	3334400	0	4240200	0	0	0	0	0	3906500	0	0	0	0	0	0	0	0	0	0	0	0	0	0	2518600	2723800	0	0
AAB41311.1	AAB41311.1	AAB41311.1 immunoglobulin light chain VL2, partial [Oncorhynchus mykiss]	81218000	74365000	76117000	70865000	63181000	63984000	88376000	107110000	119580000	108520000	25974000	0	18496000	16262000	0	0	32004000	27106000	33574000	24854000	20640000	0	0	0	0	0	0	12186000	17913000	15524000	0	0	0	0	0	9510700	16660000	21679000	29079000	22779000	54503000	53046000	47899000	35925000	52562000	45889000	49402000
AAB41312.1;AAB41313.1;CAB92150.1	AAB41312.1;AAB41313.1;CAB92150.1	AAB41312.1 immunoglobulin light chain VL2, partial [Oncorhynchus mykiss];AAB41313.1 immunoglobulin light chain VL2, partial [Oncorhynchus mykiss];CAB92150.1 immunoglobulin light chain variable region, partial [Oncorhynchus mykiss]	0	0	0	0	0	0	0	0	0	0	0	0	0	0	0	0	0	0	0	0	3653000	2937600	2642400	2066500	0	2167500	2272200	0	5652300	3373300	0	0	0	0	0	0	0	0	0	0	0	0	0	0	0	0	0
AAW66972.1;AAW66974.1;AAW66979.1	AAW66972.1;AAW66974.1	AAW66972.1 immunoglobulin mu heavy chain secretory form [Oncorhynchus mykiss];AAW66974.1 immunoglobulin mu heavy chain secretory form [Oncorhynchus mykiss]	302340000	319930000	310380000	144350000	122710000	140540000	36375000	59411000	60308000	64429000	0	0	0	0	0	0	69283000	59483000	0	48872000	0	0	0	0	0	0	0	0	0	0	90527000	77109000	80393000	60655000	0	0	124530000	148670000	112660000	126900000	36479000	141380000	104700000	91598000	113730000	52772000	49362000
AAW66973.1	AAW66973.1	AAW66973.1 immunoglobulin mu heavy chain secretory form [Oncorhynchus mykiss]	0	0	0	0	0	0	0	0	0	0	44717000	25838000	25707000	28160000	30714000	16689000	30553000	35818000	33419000	23319000	8039000	0	0	0	0	0	6808200	8891200	6229100	0	13987000	12575000	10217000	0	10485000	13238000	13012000	16868000	30582000	18167000	0	0	0	0	0	0	0
AAW66975.1;AAW66978.1	AAW66975.1	AAW66975.1 immunoglobulin mu heavy chain secretory form [Oncorhynchus mykiss]	5613700000	4751200000	5346700000	4530900000	4923000000	5514100000	6947100000	11065000000	13088000000	13267000000	7291100000	6801400000	6517600000	6035200000	5684400000	5777700000	9927000000	8280400000	9815700000	8991500000	4700700000	4485100000	3919600000	3124100000	3201500000	3538600000	4289900000	4885600000	5583600000	4457700000	5199100000	4857600000	5343100000	4731700000	5603500000	6745700000	6659700000	10575000000	9768900000	7167000000	11228000000	10651000000	10226000000	9086900000	9050200000	11128000000	11024000000
AAW66976.1;AEX30658.1	AAW66976.1;AEX30658.1	AAW66976.1 immunoglobulin delta heavy chain membrane-bound form, partial [Oncorhynchus mykiss];AEX30658.1 immunoglobulin delta heavy chain variable region, partial [Oncorhynchus mykiss]	56070000	50665000	56378000	51557000	49538000	53903000	70407000	98800000	99500000	101450000	157360000	137660000	120600000	111700000	110460000	100980000	164210000	131520000	125430000	118700000	90658000	81536000	75513000	60011000	57489000	73925000	76703000	95197000	111660000	112450000	201590000	213960000	324170000	292360000	372700000	369730000	312190000	342840000	263500000	194430000	264150000	298610000	256330000	217850000	205780000	293170000	270140000
AAW66977.1	AAW66977.1	AAW66977.1 immunoglobulin delta heavy chain membrane-bound form [Oncorhynchus mykiss]	0	0	0	0	0	0	0	0	0	0	0	0	0	6471000	0	0	0	0	0	0	0	0	0	0	0	0	0	0	0	0	0	0	0	0	0	0	0	0	0	0	0	0	0	0	0	0	0
ABR24225.1;ABR15668.1;ABR27158.1;ABR27157.1;ABR26996.1;ABR26992.1;ABR26972.1;ABR26970.1;ABF50731.1;ABR15671.1;ABR15669.1;AAW66980.1	ABR24225.1;ABR15668.1;ABR27158.1;ABR27157.1;ABR26996.1;ABR26992.1;ABR26972.1;ABR26970.1;ABF50731.1;ABR15671.1;ABR15669.1;AAW66980.1	ABR24225.1 immunoglobulin mu heavy chain, partial [Oncorhynchus mykiss];ABR15668.1 immunoglobulin mu heavy chain, partial [Oncorhynchus mykiss];ABR27158.1 immunoglobulin mu heavy chain, partial [Oncorhynchus mykiss];ABR27157.1 immunoglobulin mu heavy chain, partial [Oncorhynchus mykiss];ABR26996.1 immunoglobulin mu heavy chain, partial [Oncorhynchus mykiss];ABR26992.1 immunoglobulin mu heavy chai…	0	0	0	0	0	4747900	0	5678000	5152400	5946200	0	0	0	0	0	0	0	0	8837300	0	0	0	0	0	0	0	0	0	0	0	0	0	0	0	0	0	0	0	0	0	0	0	0	0	0	0	0
ABF50721.1;CDQ88843.1;ABR27143.1;ABF50723.1;ABR27177.1;ABR26959.1;ABR15705.1;ABF50726.1;ABF50725.1;ABF50722.1;ABR15709.1;ABR15618.1;ABR15616.1;ABR15574.1;ABR15610.1;ABR15575.1;ABR15512.1;ABR15623.1	ABF50721.1;CDQ88843.1;ABR27143.1;ABF50723.1;ABR27177.1;ABR26959.1;ABR15705.1;ABF50726.1;ABF50725.1;ABF50722.1;ABR15709.1;ABR15618.1;ABR15616.1;ABR15574.1;ABR15610.1;ABR15575.1;ABR15512.1;ABR15623.1	ABF50721.1 immunoglobulin mu heavy chain, partial [Oncorhynchus mykiss];CDQ88843.1 unnamed protein product [Oncorhynchus mykiss];ABR27143.1 immunoglobulin mu heavy chain, partial [Oncorhynchus mykiss];ABF50723.1 immunoglobulin mu heavy chain, partial [Oncorhynchus mykiss];ABR27177.1 immunoglobulin mu heavy chain, partial [Oncorhynchus mykiss];ABR26959.1 immunoglobulin mu heavy chain, partial [Onc…	0	0	0	0	0	0	0	0	0	0	0	0	0	0	0	0	0	0	0	0	10647000	12642000	0	7380200	8142600	6638700	8554200	8765200	7066600	6540200	6562500	4275500	5761000	0	0	7875900	7582400	13397000	9174800	6509000	0	0	0	0	0	0	0
ABH09041.1;ABH08997.1;ABH09039.1;ABH09037.1;ABR15539.1	ABH09041.1;ABH08997.1;ABH09039.1;ABH09037.1;ABR15539.1	ABH09041.1 immunoglobulin mu heavy chain, partial [Oncorhynchus mykiss];ABH08997.1 immunoglobulin mu heavy chain, partial [Oncorhynchus mykiss];ABH09039.1 immunoglobulin mu heavy chain, partial [Oncorhynchus mykiss];ABH09037.1 immunoglobulin mu heavy chain, partial [Oncorhynchus mykiss];ABR15539.1 immunoglobulin mu heavy chain, partial [Oncorhynchus mykiss]	39924000	21630000	26042000	22293000	22709000	26415000	20238000	44488000	61506000	81815000	0	0	0	0	0	12158000	15740000	0	0	0	0	0	0	0	0	0	0	0	0	0	21249000	23099000	32959000	32004000	34027000	36923000	29539000	38028000	27317000	15751000	37793000	41309000	31093000	29451000	33623000	36581000	29036000
CDQ95032.1;ABR26913.1;ABR26905.1;ABR26898.1;ABR15732.1;ABR27071.1;ABR27000.1;ABR15740.1;ABR15738.1;ABR15739.1;ABR15737.1;ABR15735.1;ABR15733.1;ABR15736.1;ABH09078.1;ABH08999.1;ABR15734.1;ABR27189.1	CDQ95032.1;ABR26913.1;ABR26905.1;ABR26898.1;ABR15732.1;ABR27071.1;ABR27000.1;ABR15740.1;ABR15738.1;ABR15739.1;ABR15737.1;ABR15735.1;ABR15733.1;ABR15736.1;ABH09078.1;ABH08999.1;ABR15734.1;ABR27189.1	CDQ95032.1 unnamed protein product [Oncorhynchus mykiss];ABR26913.1 immunoglobulin mu heavy chain, partial [Oncorhynchus mykiss];ABR26905.1 immunoglobulin mu heavy chain, partial [Oncorhynchus mykiss];ABR26898.1 immunoglobulin mu heavy chain, partial [Oncorhynchus mykiss];ABR15732.1 immunoglobulin mu heavy chain, partial [Oncorhynchus mykiss];ABR27071.1 immunoglobulin mu heavy chain, partial [Onc…	108690000	97430000	86461000	76345000	97169000	77738000	105360000	117510000	124040000	117360000	86382000	68456000	71769000	56182000	56824000	66688000	101130000	94037000	82033000	70395000	38384000	34338000	27910000	20436000	27092000	29184000	32912000	40340000	39853000	24733000	50666000	52052000	42111000	37971000	43779000	53235000	59384000	70412000	82934000	62610000	150510000	153610000	126520000	112450000	108140000	117490000	123800000
ABH09014.1	ABH09014.1	ABH09014.1 immunoglobulin mu heavy chain, partial [Oncorhynchus mykiss]	0	0	0	0	9440200	9401500	8533300	11023000	10658000	14829000	0	0	0	0	0	0	0	0	0	0	0	0	0	0	0	0	0	0	10236000	7504900	0	0	0	0	0	0	0	0	0	0	25980000	29484000	17854000	21257000	25381000	26690000	31149000
CDQ84472.1;ABH09043.1;ABR15697.1	CDQ84472.1;ABH09043.1;ABR15697.1	CDQ84472.1 unnamed protein product [Oncorhynchus mykiss];ABH09043.1 immunoglobulin mu heavy chain, partial [Oncorhynchus mykiss];ABR15697.1 immunoglobulin mu heavy chain, partial [Oncorhynchus mykiss]	0	0	0	0	2551300	0	0	0	6225700	0	0	0	0	0	0	2640500	5055200	0	0	4828300	4173500	3713000	3851500	4477300	3809800	8011700	5594500	3358700	3434700	2659400	0	0	1891100	1791200	2348800	0	6220200	4693200	5672500	4323800	4965000	3701700	5784500	4800600	3394900	6846900	5904300
ABH09057.1;ABR15718.1;ABH09004.1;ABH09066.1;ABH08986.1;ABR15536.1;ACI69046.1	ABH09057.1;ABR15718.1;ABH09004.1;ABH09066.1;ABH08986.1;ABR15536.1	ABH09057.1 immunoglobulin mu heavy chain, partial [Oncorhynchus mykiss];ABR15718.1 immunoglobulin mu heavy chain, partial [Oncorhynchus mykiss];ABH09004.1 immunoglobulin mu heavy chain, partial [Oncorhynchus mykiss];ABH09066.1 immunoglobulin mu heavy chain, partial [Oncorhynchus mykiss];ABH08986.1 immunoglobulin mu heavy chain, partial [Oncorhynchus mykiss];ABR15536.1 immunoglobulin mu heavy chai…	0	3129000	3319600	0	3557600	4176400	8930100	12567000	26986000	18636000	0	0	0	0	0	0	0	0	0	5146900	0	0	0	0	0	0	0	0	0	0	0	0	0	0	0	0	12660000	11619000	9188300	8968800	13351000	21368000	27079000	23234000	13194000	27682000	29811000
ABH09073.1;ABR27130.1;ABH09047.1;ABR26813.1;ABR15658.1;ABH09044.1;ABH09040.1;ABR27092.1;ABR26902.1;ABH09072.1;ABH09051.1;ABR27104.1;ABR15664.1	ABH09073.1;ABR27130.1;ABH09047.1;ABR26813.1;ABR15658.1;ABH09044.1;ABH09040.1;ABR27092.1;ABR26902.1;ABH09072.1;ABH09051.1	ABH09073.1 immunoglobulin mu heavy chain, partial [Oncorhynchus mykiss];ABR27130.1 immunoglobulin mu heavy chain, partial [Oncorhynchus mykiss];ABH09047.1 immunoglobulin mu heavy chain, partial [Oncorhynchus mykiss];ABR26813.1 immunoglobulin mu heavy chain, partial [Oncorhynchus mykiss];ABR15658.1 immunoglobulin mu heavy chain, partial [Oncorhynchus mykiss];ABH09044.1 immunoglobulin mu heavy chai…	41983000	38538000	46668000	26294000	43582000	47218000	65824000	308470000	544620000	630280000	23652000	0	0	0	0	0	27459000	0	0	0	35602000	39647000	36604000	29376000	33845000	26477000	50917000	125780000	207180000	175580000	15791000	14240000	14686000	14714000	17296000	24647000	32816000	128890000	187670000	151780000	99473000	87592000	69414000	64099000	72220000	82621000	97804000
ABH09083.1;ABR26851.1;ABR26836.1;ABR26802.1;ABR26801.1;ABR26799.1;ABR26794.1;CDQ92955.1;ABR27148.1;ABR26863.1;ABR26793.1;ABR26792.1;ABR27190.1;ABR26797.1;ABR27159.1;ABR15644.1	ABH09083.1;ABR26851.1;ABR26836.1;ABR26802.1;ABR26801.1;ABR26799.1;ABR26794.1;CDQ92955.1;ABR27148.1;ABR26863.1;ABR26793.1;ABR26792.1;ABR27190.1;ABR26797.1	ABH09083.1 immunoglobulin mu heavy chain, partial [Oncorhynchus mykiss];ABR26851.1 immunoglobulin mu heavy chain, partial [Oncorhynchus mykiss];ABR26836.1 immunoglobulin mu heavy chain, partial [Oncorhynchus mykiss];ABR26802.1 immunoglobulin mu heavy chain, partial [Oncorhynchus mykiss];ABR26801.1 immunoglobulin mu heavy chain, partial [Oncorhynchus mykiss];ABR26799.1 immunoglobulin mu heavy chai…	52692000	56874000	45376000	49615000	40194000	36881000	55822000	74885000	79214000	76828000	37558000	39581000	25955000	27708000	17424000	22362000	32227000	38826000	50270000	24523000	41677000	31907000	32381000	26945000	29628000	30483000	43612000	46275000	42710000	32631000	22499000	23076000	21714000	17650000	18911000	23831000	33225000	47925000	40815000	33908000	69111000	73392000	65712000	68343000	62811000	79125000	75962000
CDQ88842.1;ABR15533.1	CDQ88842.1;ABR15533.1	CDQ88842.1 unnamed protein product [Oncorhynchus mykiss];ABR15533.1 immunoglobulin mu heavy chain, partial [Oncorhynchus mykiss]	0	0	0	0	0	0	0	0	0	0	0	0	0	0	0	0	0	0	0	0	0	0	0	0	0	0	0	0	0	0	0	0	0	0	0	0	8346600	0	0	0	0	0	0	0	0	0	0
ABR15556.1	ABR15556.1	ABR15556.1 immunoglobulin mu heavy chain, partial [Oncorhynchus mykiss]	0	0	0	0	0	0	0	0	0	0	0	0	0	0	0	0	0	0	0	0	0	0	0	0	0	0	0	0	7421300	0	0	0	0	0	0	0	0	0	0	0	0	0	0	0	0	0	0
ABR15568.1;ABR15690.1;ABR15569.1;ABR15689.1;ABR15621.1	ABR15568.1;ABR15690.1;ABR15569.1;ABR15689.1;ABR15621.1	ABR15568.1 immunoglobulin mu heavy chain, partial [Oncorhynchus mykiss];ABR15690.1 immunoglobulin mu heavy chain, partial [Oncorhynchus mykiss];ABR15569.1 immunoglobulin mu heavy chain, partial [Oncorhynchus mykiss];ABR15689.1 immunoglobulin mu heavy chain, partial [Oncorhynchus mykiss];ABR15621.1 immunoglobulin mu heavy chain, partial [Oncorhynchus mykiss]	0	0	0	0	0	0	0	0	0	0	0	0	0	0	0	0	0	0	0	0	0	0	0	0	0	0	0	0	0	0	5151400	3713800	9261500	10266000	12099000	19374000	13455000	15969000	14559000	9564100	0	0	0	0	0	0	0
CDQ89439.1;ABR26804.1;ABR15686.1;ABR15646.1;ABR15630.1;ABR15622.1;ABR15583.1;ABR15571.1;ABR27028.1;ABR27026.1;ABR27004.1;ABR26857.1;ABR15546.1;ABR15538.1;ABR15537.1;ABR26789.1;ABR26841.1;ABR27083.1;ABR27175.1;ABR27172.1;ABR27169.1;ABR27165.1;ABR27164.1;ABR27163.1;ABR27161.1;ABR27160.1;ABR27156.1;ABR27155.1;ABR27154.1;ABR27153.1;ABR27152.1;ABR27151.1;ABR27150.1;ABR27149.1;ABR27147.1;ABR27138.1;ABR…	CDQ89439.1;ABR26804.1;ABR15686.1;ABR15646.1;ABR15630.1;ABR15622.1;ABR15583.1;ABR15571.1;ABR27028.1;ABR27026.1;ABR27004.1;ABR26857.1;ABR15546.1;ABR15538.1;ABR15537.1;ABR26789.1;ABR26841.1;ABR27083.1;ABR27175.1;ABR27172.1;ABR27169.1;ABR27165.1;ABR27164.1;ABR27163.1;ABR27161.1;ABR27160.1;ABR27156.1;ABR27155.1;ABR27154.1;ABR27153.1;ABR27152.1;ABR27151.1;ABR27150.1;ABR27149.1;ABR27147.1;ABR27138.1;ABR…	CDQ89439.1 unnamed protein product [Oncorhynchus mykiss];ABR26804.1 immunoglobulin mu heavy chain, partial [Oncorhynchus mykiss];ABR15686.1 immunoglobulin mu heavy chain, partial [Oncorhynchus mykiss];ABR15646.1 immunoglobulin mu heavy chain, partial [Oncorhynchus mykiss];ABR15630.1 immunoglobulin mu heavy chain, partial [Oncorhynchus mykiss];ABR15622.1 immunoglobulin mu heavy chain, partial [Onc…	33172000	35328000	36393000	32958000	25831000	37145000	41944000	51535000	61462000	55667000	23678000	22383000	21780000	17107000	0	15481000	21574000	17578000	0	21680000	27514000	29173000	25705000	17172000	14656000	13536000	19001000	23395000	17409000	19037000	29271000	20334000	32666000	26334000	28842000	41343000	49882000	93327000	82833000	59488000	66164000	75509000	62399000	61322000	71096000	61728000	75831000
ABR26839.1;ABR26819.1;ABR15639.1;ABR15595.1;ABR26790.1;ABR15684.1	ABR26839.1;ABR26819.1;ABR15639.1;ABR15595.1;ABR26790.1;ABR15684.1	ABR26839.1 immunoglobulin mu heavy chain, partial [Oncorhynchus mykiss];ABR26819.1 immunoglobulin mu heavy chain, partial [Oncorhynchus mykiss];ABR15639.1 immunoglobulin mu heavy chain, partial [Oncorhynchus mykiss];ABR15595.1 immunoglobulin mu heavy chain, partial [Oncorhynchus mykiss];ABR26790.1 immunoglobulin mu heavy chain, partial [Oncorhynchus mykiss];ABR15684.1 immunoglobulin mu heavy chai…	0	0	0	0	0	0	0	0	0	0	0	0	0	0	0	0	0	0	0	0	0	0	0	0	0	0	0	0	0	0	0	0	0	0	0	0	0	0	0	0	0	0	0	0	0	0	0
ABR15636.1	ABR15636.1	ABR15636.1 immunoglobulin mu heavy chain, partial [Oncorhynchus mykiss]	4242400	3631200	3580500	3793300	4207000	7189300	5999500	11708000	11357000	11752000	51691000	65703000	42384000	40748000	33692000	36853000	63303000	38909000	37233000	64857000	0	0	0	0	0	0	0	0	0	0	5671000	2329300	7096600	2439600	0	1433100	4473300	13641000	8307300	3975800	11412000	8695900	10105000	7252300	6465400	8473900	9671100
ABR15647.1;CDQ84478.1;ABR15656.1;ABF50724.1;ABR15587.1;ABR26945.1;ABR26942.1;ABR26928.1;ABR26927.1;ABR26926.1;ABR26923.1;ABF50732.1;ABF50730.1	ABR15647.1;CDQ84478.1;ABR15656.1;ABF50724.1;ABR15587.1;ABR26945.1;ABR26942.1;ABR26928.1;ABR26927.1;ABR26926.1;ABR26923.1;ABF50732.1;ABF50730.1	ABR15647.1 immunoglobulin mu heavy chain, partial [Oncorhynchus mykiss];CDQ84478.1 unnamed protein product [Oncorhynchus mykiss];ABR15656.1 immunoglobulin mu heavy chain, partial [Oncorhynchus mykiss];ABF50724.1 immunoglobulin mu heavy chain, partial [Oncorhynchus mykiss];ABR15587.1 immunoglobulin mu heavy chain, partial [Oncorhynchus mykiss];ABR26945.1 immunoglobulin mu heavy chain, partial [Onc…	0	0	8444800	6325200	6250500	6776400	9966800	18432000	19031000	15064000	0	15064000	11119000	10663000	12080000	0	28389000	0	36476000	36190000	6974600	0	0	0	0	0	0	0	5959500	0	0	0	0	0	0	6306100	9054100	18640000	15888000	10092000	9700200	0	0	8399800	6530800	15213000	15351000
ABR15652.1	ABR15652.1	ABR15652.1 immunoglobulin mu heavy chain, partial [Oncorhynchus mykiss]	0	0	0	0	0	0	0	0	0	0	20230000	10287000	11325000	10200000	9840600	15856000	13426000	17518000	13945000	13341000	0	0	0	0	0	0	2066300	0	0	0	3693800	3014900	2436300	2585600	2280100	3533800	3938000	6904900	7141800	4042700	10501000	9638600	14632000	6960300	7919900	8419300	18680000
ABR15662.1	ABR15662.1	ABR15662.1 immunoglobulin mu heavy chain, partial [Oncorhynchus mykiss]	0	0	0	0	8878500	11574000	16347000	32693000	35786000	37540000	16917000	11711000	13724000	10660000	10813000	11440000	16575000	22901000	0	33328000	0	0	0	0	0	0	0	0	0	0	0	0	0	0	0	0	0	6819400	6276300	0	6457200	6963900	4942900	3744600	0	6144600	6980000
ABR15670.1	ABR15670.1	ABR15670.1 immunoglobulin mu heavy chain, partial [Oncorhynchus mykiss]	9980700	7536300	9826200	7864700	7554900	9797700	13034000	14864000	15263000	14415000	0	12692000	11047000	10872000	9737600	0	12162000	12676000	16841000	0	5404400	4859300	0	0	0	3414400	4088900	5209900	8009600	7039900	0	0	0	0	0	0	0	21928000	16466000	12077000	10937000	12709000	9355700	9640700	9355000	10982000	10063000
ABR15702.1;ABR27135.1;ABR27122.1;ABR27080.1;ABR27041.1;ABR26977.1;ABR26808.1;ABR26998.1;ABR27059.1;ABR15701.1;ABR24192.1;ABR26812.1	ABR15702.1;ABR27135.1;ABR27122.1;ABR27080.1;ABR27041.1;ABR26977.1;ABR26808.1;ABR26998.1;ABR27059.1;ABR15701.1;ABR24192.1;ABR26812.1	ABR15702.1 immunoglobulin mu heavy chain, partial [Oncorhynchus mykiss];ABR27135.1 immunoglobulin mu heavy chain, partial [Oncorhynchus mykiss];ABR27122.1 immunoglobulin mu heavy chain, partial [Oncorhynchus mykiss];ABR27080.1 immunoglobulin mu heavy chain, partial [Oncorhynchus mykiss];ABR27041.1 immunoglobulin mu heavy chain, partial [Oncorhynchus mykiss];ABR26977.1 immunoglobulin mu heavy chai…	0	0	0	0	0	0	0	0	0	0	0	0	0	0	0	0	0	0	0	0	0	0	0	0	0	0	0	0	0	0	0	0	0	0	0	0	0	0	0	0	0	0	0	0	0	0	0
ABR15722.1;ABR27188.1;ABR27113.1;ABR27070.1	ABR15722.1;ABR27188.1;ABR27113.1;ABR27070.1	ABR15722.1 immunoglobulin mu heavy chain, partial [Oncorhynchus mykiss];ABR27188.1 immunoglobulin mu heavy chain, partial [Oncorhynchus mykiss];ABR27113.1 immunoglobulin mu heavy chain, partial [Oncorhynchus mykiss];ABR27070.1 immunoglobulin mu heavy chain, partial [Oncorhynchus mykiss]	31539000	29881000	29771000	26376000	26766000	31806000	35395000	39596000	51597000	63617000	82305000	69344000	69756000	55432000	55469000	43972000	70550000	59906000	61851000	54246000	20154000	0	0	0	0	0	0	0	0	0	25756000	20417000	0	0	0	31176000	39119000	82694000	74117000	49974000	145130000	135420000	104060000	101710000	109550000	111840000	114340000
ABR15723.1;CDQ98990.1;ABR26960.1	ABR15723.1;CDQ98990.1;ABR26960.1	ABR15723.1 immunoglobulin mu heavy chain, partial [Oncorhynchus mykiss];CDQ98990.1 unnamed protein product [Oncorhynchus mykiss];ABR26960.1 immunoglobulin mu heavy chain, partial [Oncorhynchus mykiss]	0	0	0	0	0	0	0	0	0	0	0	0	0	0	0	0	0	0	0	0	1292000	1487900	1002900	978070	926820	728030	1170000	1241000	1357900	1040700	0	0	0	0	0	0	405030	589980	669580	383500	0	0	0	0	0	0	0
ABR15741.1	ABR15741.1	ABR15741.1 immunoglobulin mu heavy chain, partial [Oncorhynchus mykiss]	0	0	0	0	0	0	0	0	0	0	0	0	0	0	0	0	0	0	0	0	0	0	0	0	0	0	0	0	0	0	0	0	0	0	0	0	0	0	0	2603600	0	0	0	0	0	0	0
ABR15744.1;ABR15745.1;ABR15743.1;CDR19119.1	ABR15744.1;ABR15745.1;ABR15743.1;CDR19119.1	ABR15744.1 immunoglobulin mu heavy chain, partial [Oncorhynchus mykiss];ABR15745.1 immunoglobulin mu heavy chain, partial [Oncorhynchus mykiss];ABR15743.1 immunoglobulin mu heavy chain, partial [Oncorhynchus mykiss];CDR19119.1 unnamed protein product [Oncorhynchus mykiss]	0	29421000	27866000	28142000	18218000	25437000	32092000	30872000	31096000	29702000	0	0	0	0	0	0	23007000	0	0	0	0	0	0	0	0	0	0	0	0	0	0	0	0	0	0	0	0	0	0	0	40803000	58705000	49839000	38154000	37584000	49344000	51257000
ABR27200.1;ABR15746.1	ABR27200.1;ABR15746.1	ABR27200.1 immunoglobulin mu heavy chain, partial [Oncorhynchus mykiss];ABR15746.1 immunoglobulin mu heavy chain, partial [Oncorhynchus mykiss]	0	0	0	0	0	0	0	0	0	0	4785400	0	4800000	4548000	4216900	4227000	6778600	6005600	8705100	6102600	0	0	0	0	0	0	0	0	0	0	0	0	0	0	0	0	0	0	2292800	2721800	0	0	0	0	0	0	0
ABR15747.1	ABR15747.1	ABR15747.1 immunoglobulin mu heavy chain, partial [Oncorhynchus mykiss]	0	0	0	0	0	0	0	0	0	0	0	0	0	0	0	0	0	0	0	6235400	0	0	0	0	0	0	0	0	0	0	0	0	0	0	0	0	0	0	0	0	0	0	0	0	0	0	0
ABR27202.1;ABR27203.1;ABR27201.1;ABR15748.1	ABR27202.1;ABR27203.1;ABR27201.1;ABR15748.1	ABR27202.1 immunoglobulin mu heavy chain, partial [Oncorhynchus mykiss];ABR27203.1 immunoglobulin mu heavy chain, partial [Oncorhynchus mykiss];ABR27201.1 immunoglobulin mu heavy chain, partial [Oncorhynchus mykiss];ABR15748.1 immunoglobulin mu heavy chain, partial [Oncorhynchus mykiss]	6991600	10069000	7250500	6658100	8369700	12362000	21685000	27622000	32201000	39753000	42430000	33389000	30473000	29875000	24767000	24838000	46300000	35072000	38920000	40510000	12327000	7465000	7143400	8222700	5505600	9741000	9454300	9737000	10675000	9939500	24882000	26120000	24761000	19614000	23640000	24499000	30958000	30323000	34326000	28789000	22859000	20996000	25035000	23045000	19175000	21376000	24151000
ABR27015.1;ABR27013.1;ABR27184.1;ABR27174.1;ABR24213.1;ABR24212.1;ABR24204.1;ABR24202.1;ABR24200.1;ABR24199.1;ABR24198.1;ABR24197.1;ABR24196.1;ABR24195.1;ABR24193.1;ABR27144.1;ABR27033.1;ABR24205.1;ABR24191.1;ABR27133.1	ABR27015.1;ABR27013.1;ABR27184.1;ABR27174.1;ABR24213.1;ABR24212.1;ABR24204.1;ABR24202.1;ABR24200.1;ABR24199.1;ABR24198.1;ABR24197.1;ABR24196.1;ABR24195.1;ABR24193.1;ABR27144.1;ABR27033.1;ABR24205.1;ABR24191.1;ABR27133.1	ABR27015.1 immunoglobulin mu heavy chain, partial [Oncorhynchus mykiss];ABR27013.1 immunoglobulin mu heavy chain, partial [Oncorhynchus mykiss];ABR27184.1 immunoglobulin mu heavy chain, partial [Oncorhynchus mykiss];ABR27174.1 immunoglobulin mu heavy chain, partial [Oncorhynchus mykiss];ABR24213.1 immunoglobulin mu heavy chain, partial [Oncorhynchus mykiss];ABR24212.1 immunoglobulin mu heavy chai…	0	0	0	0	0	0	0	0	0	0	0	0	0	0	0	0	0	0	0	0	0	0	0	0	0	0	0	0	0	0	0	0	0	0	0	0	0	0	0	0	0	0	0	0	0	0	0
CDQ86265.1;ABR24217.1	CDQ86265.1;ABR24217.1	CDQ86265.1 unnamed protein product [Oncorhynchus mykiss];ABR24217.1 immunoglobulin mu heavy chain, partial [Oncorhynchus mykiss]	0	0	0	0	0	0	0	0	0	0	0	0	0	0	0	0	0	0	0	0	0	0	0	0	0	0	0	0	0	0	1694100	1431300	1723900	0	0	0	2387900	2717600	2351000	2413100	1278900	1395700	0	1754300	0	2220900	0
ABR24220.1;AAA61754.1;ABR27205.1;ABR27204.1;ABR24221.1;ABR26814.1;ABR24219.1	ABR24220.1;AAA61754.1;ABR27205.1;ABR27204.1;ABR24221.1;ABR26814.1;ABR24219.1	ABR24220.1 immunoglobulin mu heavy chain, partial [Oncorhynchus mykiss];AAA61754.1 immunoglobulin IghMV VH6 region, partial [Oncorhynchus mykiss];ABR27205.1 immunoglobulin mu heavy chain, partial [Oncorhynchus mykiss];ABR27204.1 immunoglobulin mu heavy chain, partial [Oncorhynchus mykiss];ABR24221.1 immunoglobulin mu heavy chain, partial [Oncorhynchus mykiss];ABR26814.1 immunoglobulin mu heavy ch…	0	0	0	0	0	0	0	0	0	0	0	0	0	0	0	0	0	0	0	0	0	5636300	4850400	0	3514100	0	4253900	0	0	3060000	5443000	5827900	5324000	0	0	0	6301000	0	0	0	0	0	0	0	0	0	0
ABR26816.1;ABF50728.1;ABR26817.1;ABR15578.1;ABR26798.1;ABR26796.1;ABR26795.1;ABR15640.1	ABR26816.1;ABF50728.1;ABR26817.1;ABR15578.1;ABR26798.1;ABR26796.1;ABR26795.1;ABR15640.1	ABR26816.1 immunoglobulin mu heavy chain, partial [Oncorhynchus mykiss];ABF50728.1 immunoglobulin mu heavy chain, partial [Oncorhynchus mykiss];ABR26817.1 immunoglobulin mu heavy chain, partial [Oncorhynchus mykiss];ABR15578.1 immunoglobulin mu heavy chain, partial [Oncorhynchus mykiss];ABR26798.1 immunoglobulin mu heavy chain, partial [Oncorhynchus mykiss];ABR26796.1 immunoglobulin mu heavy chai…	74077000	65909000	75601000	56681000	68818000	79801000	122360000	271940000	354080000	350350000	48954000	55734000	49712000	45754000	43493000	41184000	75840000	73878000	90668000	79681000	0	34932000	16387000	17736000	19046000	27649000	42674000	74227000	92180000	51752000	29278000	35435000	29280000	0	0	63153000	115640000	216440000	221420000	132660000	80149000	63683000	60891000	51763000	53796000	58512000	57156000
ABR26845.1	ABR26845.1	ABR26845.1 immunoglobulin mu heavy chain, partial [Oncorhynchus mykiss]	0	0	0	0	0	0	0	0	0	0	0	0	0	0	0	0	0	0	0	0	0	0	0	0	0	0	0	0	0	0	0	0	0	0	0	0	0	0	0	0	0	0	0	0	0	0	0
ABR26846.1;AAW66981.1	ABR26846.1	ABR26846.1 immunoglobulin mu heavy chain, partial [Oncorhynchus mykiss]	0	0	0	0	0	0	2194400	4047900	0	0	6727500	7079500	7292300	6682900	6215200	6365200	9047400	12497000	18089000	9402900	0	0	0	0	0	0	0	0	0	0	0	0	0	0	0	0	0	0	4219300	3831500	0	0	0	4557600	0	0	0
ABR27043.1;ABR27091.1;ABR27084.1;ABR26866.1;ABR27075.1	ABR27043.1;ABR27091.1;ABR27084.1;ABR26866.1;ABR27075.1	ABR27043.1 immunoglobulin mu heavy chain, partial [Oncorhynchus mykiss];ABR27091.1 immunoglobulin mu heavy chain, partial [Oncorhynchus mykiss];ABR27084.1 immunoglobulin mu heavy chain, partial [Oncorhynchus mykiss];ABR26866.1 immunoglobulin mu heavy chain, partial [Oncorhynchus mykiss];ABR27075.1 immunoglobulin mu heavy chain, partial [Oncorhynchus mykiss]	3237200	0	0	0	0	3932900	5264800	5908300	7572000	7602300	29438000	21041000	28037000	23077000	18844000	25321000	17081000	31683000	35955000	27476000	16103000	17961000	11800000	11462000	10461000	12307000	12824000	12268000	14354000	12728000	8115700	7446500	8636700	9215300	7165800	13967000	12496000	16056000	18444000	17092000	0	0	0	0	0	0	0
ABR26946.1;ABR26944.1;ABR26940.1;ABR26939.1;ABR26936.1;ABR26925.1;ABR26935.1;ABR26933.1	ABR26946.1;ABR26944.1;ABR26940.1;ABR26939.1;ABR26936.1;ABR26925.1;ABR26935.1;ABR26933.1	ABR26946.1 immunoglobulin mu heavy chain, partial [Oncorhynchus mykiss];ABR26944.1 immunoglobulin mu heavy chain, partial [Oncorhynchus mykiss];ABR26940.1 immunoglobulin mu heavy chain, partial [Oncorhynchus mykiss];ABR26939.1 immunoglobulin mu heavy chain, partial [Oncorhynchus mykiss];ABR26936.1 immunoglobulin mu heavy chain, partial [Oncorhynchus mykiss];ABR26925.1 immunoglobulin mu heavy chai…	12953000	7572600	10436000	0	10802000	20683000	39449000	78592000	74994000	69300000	0	0	0	0	0	0	0	0	0	0	20293000	15160000	15760000	0	14146000	17995000	24575000	23273000	27447000	18735000	0	0	0	0	0	0	0	0	13966000	7332200	53605000	39908000	37459000	40736000	33319000	39217000	38402000
ABR27117.1;ABR27025.1;ABR27008.1;ABR27031.1;ABR26974.1;ABR26973.1;ABR26978.1;ABR26921.1;ABR26920.1;ABR26903.1	ABR27117.1;ABR27025.1;ABR27008.1;ABR27031.1;ABR26974.1;ABR26973.1;ABR26978.1;ABR26921.1;ABR26920.1;ABR26903.1	ABR27117.1 immunoglobulin mu heavy chain, partial [Oncorhynchus mykiss];ABR27025.1 immunoglobulin mu heavy chain, partial [Oncorhynchus mykiss];ABR27008.1 immunoglobulin mu heavy chain, partial [Oncorhynchus mykiss];ABR27031.1 immunoglobulin mu heavy chain, partial [Oncorhynchus mykiss];ABR26974.1 immunoglobulin mu heavy chain, partial [Oncorhynchus mykiss];ABR26973.1 immunoglobulin mu heavy chai…	0	0	0	0	0	0	0	0	0	0	0	0	0	0	0	0	0	0	0	0	0	0	0	0	0	0	0	0	0	0	0	0	0	0	0	6630100	7223000	0	0	6064900	0	0	0	0	0	0	0
ABR27129.1;ABR26984.1	ABR27129.1;ABR26984.1	ABR27129.1 immunoglobulin mu heavy chain, partial [Oncorhynchus mykiss];ABR26984.1 immunoglobulin mu heavy chain, partial [Oncorhynchus mykiss]	32947000	25231000	30273000	25921000	27027000	34900000	46148000	94992000	152930000	156780000	48022000	36422000	39492000	33245000	28416000	22444000	36921000	119960000	269300000	271470000	16376000	0	10344000	8237300	9046400	7509100	9451700	13558000	24939000	13512000	0	0	0	0	0	0	4671600	14646000	26658000	24205000	56210000	43456000	49891000	44855000	47981000	64189000	68990000
ABR27005.1;ABR27078.1;ABR27069.1;ABR15712.1;ABR15710.1;ABR27077.1;ABR27072.1;ABR26831.1;ABR15660.1;ABR15562.1;ABR15555.1;ABH09036.1;ABR27034.1;ABR26963.1;ABR15615.1;ABR27093.1;ABR15654.1	ABR27005.1;ABR27078.1;ABR27069.1;ABR15712.1;ABR15710.1;ABR27077.1;ABR27072.1;ABR26831.1;ABR15660.1;ABR15562.1;ABR15555.1;ABH09036.1;ABR27034.1;ABR26963.1;ABR15615.1;ABR27093.1;ABR15654.1	ABR27005.1 immunoglobulin mu heavy chain, partial [Oncorhynchus mykiss];ABR27078.1 immunoglobulin mu heavy chain, partial [Oncorhynchus mykiss];ABR27069.1 immunoglobulin mu heavy chain, partial [Oncorhynchus mykiss];ABR15712.1 immunoglobulin mu heavy chain, partial [Oncorhynchus mykiss];ABR15710.1 immunoglobulin mu heavy chain, partial [Oncorhynchus mykiss];ABR27077.1 immunoglobulin mu heavy chai…	49964000	38588000	40830000	39655000	36088000	39900000	51557000	69439000	71466000	72307000	174500000	158690000	139200000	139600000	113570000	115560000	202880000	161410000	175640000	160620000	22917000	10526000	10345000	9295200	10077000	21242000	17312000	15287000	23697000	21240000	20653000	45150000	25537000	26661000	23191000	39229000	70267000	96775000	109030000	119790000	22737000	47463000	54622000	32563000	22044000	46579000	47512000
ABR27095.1;ABR27037.1;ABR27098.1	ABR27095.1;ABR27037.1;ABR27098.1	ABR27095.1 immunoglobulin mu heavy chain, partial [Oncorhynchus mykiss];ABR27037.1 immunoglobulin mu heavy chain, partial [Oncorhynchus mykiss];ABR27098.1 immunoglobulin mu heavy chain, partial [Oncorhynchus mykiss]	0	0	0	0	0	0	0	0	0	0	0	0	0	0	0	0	0	0	0	7804400	0	0	0	0	0	0	0	0	0	0	0	0	0	0	0	0	0	3622600	0	0	0	0	1654700	0	0	1814700	2044400
ABR27100.1;ABR27089.1	ABR27100.1;ABR27089.1	ABR27100.1 immunoglobulin mu heavy chain, partial [Oncorhynchus mykiss];ABR27089.1 immunoglobulin mu heavy chain, partial [Oncorhynchus mykiss]	44417000	37805000	39326000	42267000	40466000	51261000	56734000	67209000	53998000	59388000	121440000	110000000	107840000	91041000	96157000	93823000	143190000	114190000	125940000	109980000	27271000	24505000	14496000	13842000	14628000	16289000	16549000	20951000	26645000	15868000	12793000	10791000	15656000	12194000	17680000	20048000	16440000	26294000	26736000	20246000	422790000	387880000	346030000	302010000	342210000	339970000	350710000
ABR27178.1;ABR27167.1;ABR27012.1;ABR27002.1;ABR15547.1	ABR27178.1;ABR27167.1;ABR27012.1;ABR27002.1;ABR15547.1	ABR27178.1 immunoglobulin mu heavy chain, partial [Oncorhynchus mykiss];ABR27167.1 immunoglobulin mu heavy chain, partial [Oncorhynchus mykiss];ABR27012.1 immunoglobulin mu heavy chain, partial [Oncorhynchus mykiss];ABR27002.1 immunoglobulin mu heavy chain, partial [Oncorhynchus mykiss];ABR15547.1 immunoglobulin mu heavy chain, partial [Oncorhynchus mykiss]	10979000	0	0	0	0	5510400	10480000	0	22197000	23768000	9800300	0	0	0	0	0	0	0	0	0	0	0	0	0	0	0	0	0	4057500	0	4802800	2835100	4303900	5448200	4726100	10627000	12071000	32314000	29292000	21226000	0	5264700	2895200	0	0	0	0
ABR27197.1;ABR27194.1;ABR27193.1;ABR27196.1	ABR27197.1;ABR27194.1;ABR27193.1;ABR27196.1	ABR27197.1 immunoglobulin mu heavy chain, partial [Oncorhynchus mykiss];ABR27194.1 immunoglobulin mu heavy chain, partial [Oncorhynchus mykiss];ABR27193.1 immunoglobulin mu heavy chain, partial [Oncorhynchus mykiss];ABR27196.1 immunoglobulin mu heavy chain, partial [Oncorhynchus mykiss]	0	0	0	6351800	0	5005400	9419900	0	8763000	7403000	0	8815700	0	0	0	0	9058500	8658700	0	0	0	0	0	0	0	0	0	0	0	0	0	0	0	0	0	0	0	0	0	0	0	0	8856200	0	0	9598900	10933000
ACS94421.1	ACS94421.1	ACS94421.1 immunoglobulin light chain III variable region [Oncorhynchus mykiss]	17790000	18948000	20232000	17163000	18446000	19046000	26117000	33163000	42687000	41459000	43725000	32692000	39386000	31238000	33156000	34606000	54213000	44536000	47708000	43001000	19945000	27399000	24294000	18112000	16797000	16418000	18961000	21627000	23001000	20165000	23436000	27532000	18897000	16849000	19334000	19632000	25490000	31191000	54656000	38449000	93464000	88974000	77252000	63323000	56464000	56726000	68576000
AFA53237.1;AFA53238.1;AEX30657.1	AFA53237.1;AFA53238.1	AFA53237.1 immunoglobulin delta heavy chain secretory tail A, partial [Oncorhynchus mykiss];AFA53238.1 immunoglobulin delta heavy chain secretory form small splice variant 2, partial [Oncorhynchus mykiss]	0	0	0	0	0	0	0	0	0	0	0	0	0	0	0	0	0	0	0	4487700	0	0	0	0	0	0	0	0	0	0	0	0	0	0	0	0	0	0	0	0	0	0	0	0	0	0	0
ANW11925.1	ANW11925.1	ANW11925.1 mmunoglobulin tau 2 secretory form, partial [Oncorhynchus mykiss]	0	0	0	0	0	0	0	0	0	0	0	0	0	0	0	0	0	0	0	0	0	0	0	0	0	0	0	0	0	5492300	0	0	0	0	0	0	0	5247500	13785000	13639000	0	0	0	0	0	0	0
CAA46362.1	CAA46362.1	CAA46362.1 immunoglobulin light chain, partial [Oncorhynchus mykiss]	102170000	96215000	81673000	71719000	68556000	82589000	97523000	153100000	203050000	241560000	75986000	112880000	107580000	93647000	105550000	89478000	95322000	130740000	142380000	120370000	122060000	146150000	126380000	105720000	112850000	81115000	115250000	124180000	132500000	107900000	83592000	81842000	86894000	80693000	100840000	127290000	93930000	151220000	154280000	112510000	194210000	154330000	118860000	118850000	139960000	117140000	113530000
CAA46364.1;CDQ86267.1;ABR24211.1;ABR24207.1	CAA46364.1;CDQ86267.1;ABR24211.1;ABR24207.1	CAA46364.1 secretory form of immunoglobulin heavy chain, variable region, partial [Oncorhynchus mykiss];CDQ86267.1 unnamed protein product [Oncorhynchus mykiss];ABR24211.1 immunoglobulin mu heavy chain, partial [Oncorhynchus mykiss];ABR24207.1 immunoglobulin mu heavy chain, partial [Oncorhynchus mykiss]	61873000	57688000	54230000	57352000	49770000	58136000	51607000	66167000	86291000	63471000	192920000	176620000	171010000	157930000	139140000	146300000	247320000	192210000	182320000	170980000	13110000	13575000	9074500	10480000	0	9602700	10190000	9050200	11605000	9899200	43377000	40568000	33356000	35555000	31777000	37113000	67265000	52356000	85538000	63426000	63998000	71837000	56767000	54050000	48710000	71038000	85268000
CAA48528.1	CAA48528.1	CAA48528.1 immunoglobulin light chain, partial [Oncorhynchus mykiss]	143610000	130330000	121410000	104450000	113690000	134920000	153430000	229960000	288120000	289980000	348240000	322550000	284930000	222230000	239460000	230620000	293870000	365300000	462200000	367430000	162200000	179070000	140950000	109680000	83786000	98941000	104780000	128250000	133470000	126150000	171400000	163880000	190580000	195730000	223900000	230740000	193580000	353210000	419900000	283810000	504930000	478750000	363290000	407770000	492630000	456390000	445840000
CAA48529.1;CAB92244.1	CAA48529.1;CAB92244.1	CAA48529.1 immunoglobulin light chain, partial [Oncorhynchus mykiss];CAB92244.1 immunoglobulin light chain constant region, partial [Oncorhynchus mykiss]	9044600	16788000	12602000	9156700	13331000	10027000	21225000	22355000	54546000	43976000	18481000	9037900	21601000	13552000	18021000	24878000	17661000	29116000	31505000	24656000	14887000	0	0	0	0	0	0	0	0	0	0	0	0	0	0	0	0	0	0	0	43665000	0	0	0	0	0	36353000
CAA48530.1;CDQ79246.1	CAA48530.1;CDQ79246.1	CAA48530.1 immunoglobulin light chain, partial [Oncorhynchus mykiss];CDQ79246.1 unnamed protein product [Oncorhynchus mykiss]	299300000	314850000	284560000	218870000	265540000	272760000	401270000	549660000	682810000	597060000	551900000	348480000	433860000	326080000	341920000	399060000	451680000	575460000	579450000	518910000	188890000	189170000	152150000	114810000	124940000	130800000	184240000	238040000	267090000	190770000	168370000	162000000	137310000	116770000	151540000	201340000	228950000	399050000	466010000	368820000	424740000	431200000	400010000	347110000	350630000	395700000	500430000
CAA48532.1	CAA48532.1	CAA48532.1 immunoglobulin light chain, partial [Oncorhynchus mykiss]	0	0	0	0	0	0	0	0	0	0	0	0	0	3459600	0	0	0	0	0	0	0	0	0	0	0	0	0	2250800	3525800	0	0	0	0	0	0	0	0	0	0	2173100	4676500	4051000	4189700	0	0	5578900	4921000
CAB72438.2	CAB72438.2	CAB72438.2 immunoglobulin light chain variable region, partial [Oncorhynchus mykiss]	0	0	0	0	0	0	0	0	0	0	0	0	0	0	0	0	0	0	0	0	0	0	0	0	0	0	0	0	0	0	0	0	0	0	0	0	0	0	0	0	0	0	0	0	0	0	0
CAB92242.1	CAB92242.1	CAB92242.1 immunoglobulin light chain variable region, partial [Oncorhynchus mykiss]	47983000	46759000	41875000	42904000	37168000	44067000	40496000	74975000	80295000	99857000	36919000	34156000	28869000	28147000	27592000	29394000	39558000	42907000	43476000	39042000	21178000	19527000	17631000	9823400	10950000	12016000	14962000	24925000	23636000	19895000	10707000	7588900	9704000	5277300	8059500	8415600	12946000	14658000	16677000	5915000	16049000	17225000	13477000	6508700	8319000	12036000	10896000
CDQ93688.1;ABH09076.1	CDQ93688.1;ABH09076.1	CDQ93688.1 unnamed protein product [Oncorhynchus mykiss];ABH09076.1 immunoglobulin mu heavy chain, partial [Oncorhynchus mykiss]	76978000	72709000	69598000	80088000	79516000	85729000	93961000	111130000	122110000	131660000	0	0	0	14753000	0	0	0	0	0	0	0	0	0	0	0	8285000	9695400	2926300	0	6741600	0	0	0	0	0	0	0	0	0	0	173280000	164220000	124160000	117550000	127020000	140770000	140970000
NP_001117649.1;XP_021413219.1	NP_001117649.1;XP_021413219.1	NP_001117649.1 collagen 1a1 precursor [Oncorhynchus mykiss];XP_021413219.1 collagen alpha-1(I) chain-like [Oncorhynchus mykiss]	6753300	5810900	0	0	0	9619800	4932700	0	0	0	0	0	0	0	0	7645600	0	0	0	5065200	0	0	0	0	0	0	0	0	0	0	0	0	0	8718000	0	0	0	0	0	0	7350300	6919000	0	0	0	0	0
XP_021449165.1;XP_021480944.1;XP_021480943.1;XP_021480941.1;XP_021447991.1;NP_001117659.1	XP_021449165.1;XP_021480944.1;XP_021480943.1;XP_021480941.1;XP_021447991.1;NP_001117659.1	XP_021449165.1 hemoglobin subunit beta-like, partial [Oncorhynchus mykiss];XP_021480944.1 hemoglobin subunit beta-like [Oncorhynchus mykiss];XP_021480943.1 hemoglobin subunit beta-like [Oncorhynchus mykiss];XP_021480941.1 hemoglobin subunit beta-like [Oncorhynchus mykiss];XP_021447991.1 hemoglobin subunit beta-like [Oncorhynchus mykiss];NP_001117659.1 embryonic beta-type globin [Oncorhynchus myki…	0	0	0	0	0	0	0	0	0	0	0	0	0	0	0	0	0	0	0	0	0	0	0	0	0	0	0	0	0	0	0	0	0	0	0	0	0	0	0	0	2401200	0	0	0	0	0	0
NP_001117661.1;XP_021463403.1;XP_021439601.1;XP_021439600.1	NP_001117661.1;XP_021463403.1	NP_001117661.1 matrix metalloproteinase-2 precursor [Oncorhynchus mykiss];XP_021463403.1 72 kDa type IV collagenase-like [Oncorhynchus mykiss]	48385000	39361000	40097000	35681000	36371000	43239000	35637000	33287000	37370000	40133000	44162000	41940000	42270000	37201000	45696000	45220000	50811000	37822000	40827000	38047000	35946000	34360000	27460000	24967000	28971000	26503000	25856000	30991000	32135000	32268000	39693000	33171000	33508000	31266000	27450000	39496000	29375000	36519000	36483000	33338000	40821000	36451000	33226000	33906000	31767000	31832000	34828000
NP_001117667.1	NP_001117667.1	NP_001117667.1 rhamnose binding lectin STL1 precursor [Oncorhynchus mykiss]	387980000	425210000	398700000	421010000	377840000	381680000	371980000	386440000	339190000	372410000	461840000	378730000	421750000	412530000	396450000	370710000	490570000	355880000	312710000	332120000	392710000	397120000	334910000	350770000	288560000	286840000	277240000	363120000	375040000	381090000	358150000	413870000	365380000	367050000	392030000	354920000	260880000	303700000	306020000	346250000	388690000	503130000	475850000	464780000	401360000	438190000	427400000
NP_001117673.1	NP_001117673.1	NP_001117673.1 complement factor B/C2-B precursor [Oncorhynchus mykiss]	245520000	275980000	268310000	279860000	263290000	284140000	263990000	244240000	238870000	242940000	196290000	233050000	218120000	236460000	228150000	232080000	154470000	217760000	227150000	197740000	215290000	254090000	224600000	222530000	228480000	200290000	199100000	222600000	258680000	237620000	289910000	332470000	364430000	346650000	387570000	320730000	260700000	291430000	315600000	286130000	235740000	301520000	263310000	250210000	273680000	222460000	209480000
XP_021479016.1;NP_001117681.1	XP_021479016.1;NP_001117681.1	XP_021479016.1 glyceraldehyde-3-phosphate dehydrogenase [Oncorhynchus mykiss];NP_001117681.1 glyceraldehyde 3-phosphate dehydrogenase [Oncorhynchus mykiss]	0	37362000	2711500	0	0	6111400	0	0	0	15862000	251060000	11480000	0	0	2011600	2019300	0	0	0	0	135010000	71603000	3962900	2584400	34503000	13803000	357320000	653280	0	13532000	1466600	3342800	0	258030000	1341900	0	0	0	0	35834000	214590000	17890000	5938900	8472800	38901000	0	49506000
NP_001117693.1;XP_021445103.1	NP_001117693.1	NP_001117693.1 carbonic anhydrase II [Oncorhynchus mykiss]	20445000	10813000	11217000	7548800	9433400	9365700	5973200	15259000	0	14221000	67850000	32354000	29509000	0	9105600	16823000	19014000	13624000	0	10075000	23702000	21707000	23321000	34688000	13993000	7403900	22092000	8751100	13727000	11092000	10072000	7305500	18727000	30139000	16293000	10333000	25062000	6795300	3418300	17478000	374360000	19552000	16464000	8085900	11442000	14229000	19290000
XP_021466889.1;NP_001117703.1;NP_001118063.1;XP_021454047.1	XP_021466889.1;NP_001117703.1;NP_001118063.1;XP_021454047.1	XP_021466889.1 heat shock 90kDa protein 1 beta isoform X1 [Oncorhynchus mykiss];NP_001117703.1 heat shock 90kDa protein 1 beta isoform a [Oncorhynchus mykiss];NP_001118063.1 heat shock 90kDa protein 1 beta isoform b [Oncorhynchus mykiss];XP_021454047.1 heat shock 90kDa protein 1 beta isoform X1 [Oncorhynchus mykiss]	0	0	0	0	0	0	0	0	0	0	0	0	0	0	0	0	0	0	0	0	0	0	0	0	0	0	0	0	0	0	0	0	0	0	0	0	0	0	0	0	4887300	0	0	0	0	0	0
XP_021473460.1;XP_021438340.1;NP_001117704.1;XP_021479501.1;XP_021480498.1;XP_021446601.1	XP_021473460.1;XP_021438340.1;NP_001117704.1;XP_021479501.1	XP_021473460.1 heat shock cognate 71 kDa protein [Oncorhynchus mykiss];XP_021438340.1 heat shock cognate 70 kDa protein-like [Oncorhynchus mykiss];NP_001117704.1 heat shock cognate 70 kDa protein [Oncorhynchus mykiss];XP_021479501.1 LOW QUALITY PROTEIN: heat shock cognate 70 kDa protein-like [Oncorhynchus mykiss]	0	0	0	0	0	0	0	0	0	0	0	0	0	0	0	0	0	0	0	0	0	0	0	0	0	0	0	0	0	0	0	0	0	0	0	0	0	0	0	0	0	0	0	0	0	0	0
XP_021451455.1;NP_001117707.1;XP_021448752.1;XP_021448349.1;XP_021451454.1;XP_021448753.1;XP_021413122.1;XP_021413121.1;XP_021413119.1;XP_021413118.1;XP_021413117.1;XP_021413116.1	XP_021451455.1;NP_001117707.1;XP_021448752.1;XP_021448349.1;XP_021451454.1;XP_021448753.1	XP_021451455.1 actin, cytoplasmic 1 isoform X2 [Oncorhynchus mykiss];NP_001117707.1 actin beta [Oncorhynchus mykiss];XP_021448752.1 actin, cytoplasmic 1-like isoform X1 [Oncorhynchus mykiss];XP_021448349.1 actin, cytoplasmic 1-like [Oncorhynchus mykiss];XP_021451454.1 actin, cytoplasmic 1 isoform X1 [Oncorhynchus mykiss];XP_021448753.1 actin, cytoplasmic 1-like isoform X2 [Oncorhynchus mykiss]	68757000	33584000	51835000	67515000	92551000	65856000	41107000	57973000	40499000	51437000	64642000	32375000	74413000	89554000	27123000	143070000	17952000	33201000	36644000	36418000	50461000	41639000	53759000	58040000	46388000	53148000	48870000	56303000	69642000	68227000	47688000	46493000	49837000	68824000	35633000	36114000	59497000	52300000	47412000	77463000	204090000	31907000	40696000	60280000	33543000	80844000	54949000
NP_001117709.1	NP_001117709.1	NP_001117709.1 sex hormone-binding globulin precursor [Oncorhynchus mykiss]	1349400000	1206200000	1166700000	1182500000	1057400000	1061200000	1101200000	1071600000	1091000000	1123900000	1136700000	1154400000	969920000	1037900000	1028500000	1036500000	1631600000	1072500000	989440000	1101400000	1193300000	1048200000	997020000	977570000	928180000	1004900000	966790000	984640000	962440000	1017500000	1229200000	1085700000	1106300000	978540000	1087800000	1115200000	1397100000	1269500000	1239100000	1045000000	856300000	874120000	1088100000	1032500000	943010000	1215700000	1196100000
NP_001117719.1	NP_001117719.1	NP_001117719.1 apolipoprotein A-I-1 precursor [Oncorhynchus mykiss]	50706000000	46957000000	44708000000	45503000000	39057000000	40947000000	42400000000	41759000000	39692000000	48018000000	46333000000	43149000000	44258000000	45815000000	39218000000	40380000000	20746000000	40096000000	40315000000	44699000000	66533000000	61570000000	54079000000	47924000000	43149000000	50467000000	45969000000	43786000000	43138000000	42093000000	44996000000	38352000000	30167000000	29187000000	32113000000	34716000000	41678000000	37045000000	44709000000	34464000000	44139000000	51270000000	46131000000	43687000000	33035000000	47153000000	49241000000
XP_021437153.1;NP_001117720.1	XP_021437153.1;NP_001117720.1	XP_021437153.1 apolipoprotein A-I-2 isoform X1 [Oncorhynchus mykiss];NP_001117720.1 apolipoprotein A-I-2 precursor [Oncorhynchus mykiss]	14181000000	13386000000	12401000000	13400000000	11738000000	11299000000	11411000000	9728400000	9430300000	10220000000	15010000000	15444000000	14242000000	16755000000	13580000000	14500000000	1946900000	13463000000	11360000000	13918000000	15162000000	12240000000	13244000000	13994000000	12577000000	15555000000	13023000000	9689000000	7107700000	7278800000	8686900000	7327200000	7052300000	6775700000	8120800000	7404400000	10508000000	7527100000	7686900000	7324400000	9649600000	10554000000	12438000000	12856000000	9271100000	13719000000	14387000000
NP_001117732.1;XP_021472918.1	NP_001117732.1;XP_021472918.1	NP_001117732.1 apolipoprotein CII precursor [Oncorhynchus mykiss];XP_021472918.1 apolipoprotein CII isoform X1 [Oncorhynchus mykiss]	1081700000	1110200000	952250000	901440000	869300000	1011200000	1047000000	1135800000	1084400000	1335700000	1238400000	1181500000	1344100000	1025000000	1236800000	1050300000	18218000	1476400000	1601200000	1615100000	1166000000	1215200000	1775800000	1434900000	1566700000	1197500000	1101300000	1200700000	1266400000	1070000000	1506700000	1297400000	1678200000	1676300000	1674500000	1619600000	1425400000	1805200000	1665900000	1786500000	1452700000	1385200000	1179500000	1191400000	1971800000	1142800000	1199000000
NP_001117737.1;XP_021466891.1	NP_001117737.1;XP_021466891.1	NP_001117737.1 precerebellin-like protein precursor [Oncorhynchus mykiss];XP_021466891.1 precerebellin-like protein isoform X1 [Oncorhynchus mykiss]	83206000	150840000	201940000	414610000	823360000	885420000	1000600000	1043400000	835510000	783160000	266910000	448380000	664180000	1002900000	1109100000	1057100000	1830400000	1232500000	982570000	900180000	255970000	446210000	397750000	613200000	1048200000	834400000	1047900000	1797200000	2151300000	1817600000	797010000	1530100000	1538700000	1493000000	1653100000	1482800000	516830000	1267500000	972580000	966980000	414510000	727500000	573050000	604080000	711230000	743710000	741840000
NP_001117746.1	NP_001117746.1	NP_001117746.1 vitelline envelope protein gamma precursor [Oncorhynchus mykiss]	24779000	20681000	8602200	15492000	13776000	15629000	18231000	18969000	25047000	13042000	24485000	8993700	12611000	11711000	12718000	15530000	14143000	11909000	12933000	10120000	18427000	14970000	12972000	12568000	9590800	9192900	13774000	9757100	19049000	31369000	11232000	7618300	11353000	22247000	17846000	10563000	22101000	32565000	25015000	22571000	0	0	9304900	5446200	0	5015200	7986100
NP_001117750.1	NP_001117750.1	NP_001117750.1 retinol-binding protein 4 precursor [Oncorhynchus mykiss]	0	26248000	25881000	20385000	21098000	31226000	27226000	20667000	13606000	20897000	21767000	0	25246000	27702000	31721000	0	37569000	22464000	0	21192000	24914000	35845000	40823000	24934000	22420000	26645000	27792000	25732000	17181000	16058000	28272000	24432000	42443000	42837000	61232000	54750000	25538000	35352000	26150000	24047000	31019000	26346000	29969000	21709000	24836000	20628000	14168000
NP_001117756.1	NP_001117756.1	NP_001117756.1 complement C1 inhibitor [Oncorhynchus mykiss]	5839400	6817600	6737400	6524900	9498500	9042500	0	0	17363000	0	0	0	0	0	0	1952100	0	0	0	0	0	0	6310200	13011000	0	17535000	11825000	12010000	7007800	13852000	18244000	12476000	10946000	7130200	0	6457800	19204000	8307700	10120000	0	0	0	17605000	6832200	0	13475000	13389000
NP_001117775.1;XP_021431344.1;XP_021431342.1;XP_021431341.1;XP_021431340.1	NP_001117775.1;XP_021431344.1;XP_021431342.1;XP_021431341.1;XP_021431340.1	NP_001117775.1 nucleoside diphosphate kinase [Oncorhynchus mykiss];XP_021431344.1 nucleoside diphosphate kinase A-like [Oncorhynchus mykiss];XP_021431342.1 nucleoside diphosphate kinase A-like [Oncorhynchus mykiss];XP_021431341.1 nucleoside diphosphate kinase A-like [Oncorhynchus mykiss];XP_021431340.1 nucleoside diphosphate kinase A-like [Oncorhynchus mykiss]	0	0	0	0	0	0	0	0	0	0	0	0	0	0	0	0	0	0	0	0	0	0	0	0	0	6603500	0	0	0	0	0	0	0	0	0	0	11284000	0	0	0	0	0	0	0	0	0	0
NP_001117818.1	NP_001117818.1	NP_001117818.1 apolipoprotein E precursor [Oncorhynchus mykiss]	166260000	140920000	90494000	82925000	97896000	105210000	129460000	155640000	134360000	64442000	163280000	136650000	126830000	152870000	138580000	164950000	28947000	285270000	279610000	183920000	127420000	124470000	118190000	108840000	115190000	132050000	123800000	145150000	147310000	163580000	177730000	167530000	138750000	136400000	120760000	157580000	156550000	217880000	229960000	218930000	171810000	132460000	118340000	114310000	138800000	176230000	227390000
NP_001123454.1;NP_001117822.1	NP_001123454.1;NP_001117822.1	NP_001123454.1 thymosin beta-11 [Oncorhynchus mykiss];NP_001117822.1 beta thymosin [Oncorhynchus mykiss]	0	0	0	0	0	0	0	0	0	0	0	0	0	0	0	0	0	0	0	0	0	0	0	0	0	0	0	0	0	0	0	0	0	0	0	0	0	0	0	0	0	0	0	0	0	0	0
NP_001117852.1	NP_001117852.1	NP_001117852.1 complement C1r subcomponent precursor [Oncorhynchus mykiss]	100190000	99135000	86074000	90906000	95133000	98115000	107240000	97486000	90191000	94286000	75412000	83303000	96723000	84450000	91960000	84538000	85433000	83047000	81137000	100010000	106700000	93324000	94378000	93628000	97721000	109490000	95841000	104770000	93448000	111590000	86740000	91427000	91711000	72602000	93651000	98455000	96695000	109870000	87539000	85657000	79521000	89620000	74567000	69132000	74416000	65928000	55880000
NP_001117853.1	NP_001117853.1	NP_001117853.1 protein LEG1 homolog precursor [Oncorhynchus mykiss]	2093200000	1688200000	1432700000	1199300000	971100000	976830000	989720000	1187000000	1078800000	1082200000	1893000000	1948100000	1494300000	1404900000	1091100000	931640000	1933700000	1479500000	1375600000	1210800000	1716800000	1624600000	1412000000	1113800000	919630000	707960000	808050000	753060000	616470000	525320000	1324000000	1174000000	1206500000	1103300000	1056100000	1178600000	993370000	1223300000	1090400000	752050000	1167300000	984160000	1010100000	909540000	785280000	732820000	725420000
NP_001117855.1	NP_001117855.1	NP_001117855.1 chitinase precursor [Oncorhynchus mykiss]	94182000	76964000	87392000	95334000	105440000	110610000	116940000	140400000	127230000	130030000	86464000	74170000	74535000	86771000	98656000	94374000	159990000	111150000	111340000	103590000	53761000	60178000	55642000	64329000	73151000	63823000	77454000	98626000	105870000	103940000	72559000	91094000	79796000	82968000	97890000	97821000	94833000	130910000	131120000	110190000	66777000	85798000	79346000	80552000	98127000	96705000	87159000
NP_001117856.1	NP_001117856.1	NP_001117856.1 prothrombin precursor [Oncorhynchus mykiss]	1624700000	1300100000	1379700000	1358000000	1360800000	1202400000	1268900000	1240800000	1340100000	1155300000	1554500000	1286500000	1242000000	1277500000	1149200000	1206600000	36352000	1353500000	1509300000	1190400000	1248200000	1207200000	1093400000	1016900000	965350000	964600000	1108400000	976420000	1128700000	1058900000	1274000000	1177700000	1086300000	1154900000	1442000000	1322700000	1128000000	1146400000	1261300000	1076600000	1108400000	1115300000	1119600000	1069400000	1158600000	1128300000	1208700000
NP_001117857.1	NP_001117857.1	NP_001117857.1 complement component 4 precursor [Oncorhynchus mykiss]	2992000000	3839500000	4203400000	4345200000	4327100000	4206700000	3920600000	3748300000	3323300000	3212800000	3091600000	3531400000	3994200000	4269900000	4363600000	4061100000	4604300000	3966600000	3701500000	3372100000	1601900000	1880400000	1803600000	1811900000	1960800000	1726400000	1623900000	1568200000	1848000000	1759000000	2675900000	2881600000	2928300000	2781200000	2821700000	2802600000	2572500000	2344600000	1947500000	1945700000	2869100000	3478600000	4249800000	3698700000	3155500000	3428000000	2932700000
NP_001117858.1	NP_001117858.1	NP_001117858.1 protein AMBP precursor [Oncorhynchus mykiss]	0	0	0	0	0	0	0	0	0	0	0	0	0	0	0	0	0	0	0	0	76882000	56418000	53996000	56413000	55112000	72863000	81355000	61263000	55040000	69022000	51747000	38247000	39031000	47454000	64741000	50313000	51787000	43436000	37215000	43164000	0	0	0	0	0	0	0
NP_001117863.1	NP_001117863.1	NP_001117863.1 plasminogen precursor [Oncorhynchus mykiss]	1232800000	1156300000	1211700000	1102100000	1041400000	1079200000	1118400000	1117300000	1017900000	1054800000	1312600000	1252800000	1167600000	1129700000	1162500000	1161700000	1571900000	1176500000	1153000000	1018700000	1221800000	1245000000	1070600000	997230000	958510000	1008700000	1052400000	1082300000	1114500000	1044500000	1258100000	1297000000	1078800000	1105500000	1172800000	1213100000	1082300000	993380000	1110800000	998250000	1060100000	1395200000	1205100000	1178300000	1089300000	1169700000	1133900000
NP_001117869.1	NP_001117869.1	NP_001117869.1 alpha-1-antiproteinase-like protein precursor [Oncorhynchus mykiss]	4892500000	5723800000	5688600000	5542100000	4392900000	5355600000	4542000000	4793700000	4274400000	4690700000	3720200000	3493500000	3280300000	4020500000	3962400000	2998000000	2005500000	3450400000	2797400000	3356900000	1232500000	1815800000	1586300000	1678300000	1531400000	1222700000	1469900000	1652400000	1218600000	1131900000	1750600000	1949900000	1402500000	1472200000	1635500000	1610400000	2053400000	1497300000	1294200000	1056300000	1242700000	885220000	1367200000	1214300000	1029800000	1210300000	1270600000
NP_001117870.1	NP_001117870.1	NP_001117870.1 secreted phosphoprotein 24 precursor [Oncorhynchus mykiss]	11217000	0	4666500	16638000	0	0	0	10388000	0	0	10230000	0	0	0	0	0	0	7940500	0	12407000	9230100	0	9818200	11296000	9906100	13139000	9822000	5471700	6144200	8874600	7916900	5298000	10889000	10914000	13997000	8834900	14747000	12775000	8431100	11005000	4145500	0	6134200	6052600	0	5540200	6812600
NP_001117877.1	NP_001117877.1	NP_001117877.1 cytokine receptor precursor [Oncorhynchus mykiss]	0	0	0	0	0	0	0	0	0	0	0	0	0	0	0	0	0	0	0	0	0	0	0	0	0	0	0	0	0	0	0	0	0	0	0	0	0	0	0	0	0	0	0	0	0	0	0
NP_001117879.1	NP_001117879.1	NP_001117879.1 complement component C7-2 precursor [Oncorhynchus mykiss]	458050000	412460000	394580000	361780000	326870000	311790000	295200000	330130000	346470000	324660000	332460000	290450000	296520000	264130000	242800000	292990000	345680000	336820000	397890000	337060000	369550000	333360000	348350000	293340000	309770000	185750000	232440000	227280000	238720000	191090000	299950000	233970000	166300000	174720000	171020000	158170000	206930000	311370000	402480000	348760000	377970000	354090000	184790000	249460000	234590000	356170000	357310000
NP_001117880.1	NP_001117880.1	NP_001117880.1 complement component C8 gamma chain precursor [Oncorhynchus mykiss]	93799000	108890000	94498000	114100000	119000000	114030000	110650000	107970000	108530000	99150000	64995000	84061000	88650000	97066000	100340000	101310000	125850000	98410000	98701000	96584000	85953000	93180000	107240000	98429000	90877000	70419000	77435000	103690000	99290000	96420000	85785000	88174000	75375000	88976000	91553000	97807000	70373000	109280000	111280000	108770000	76545000	98980000	62968000	87196000	90000000	103260000	90310000
NP_001117882.1	NP_001117882.1	NP_001117882.1 complement factor H precursor [Oncorhynchus mykiss]	2384300000	3131800000	3199300000	3217700000	3922100000	3720600000	4233400000	4077100000	3423400000	3613500000	1900800000	2557400000	2525500000	2613100000	3059600000	2911200000	3242900000	2491600000	2193200000	2166600000	2572200000	3492800000	3090200000	3797400000	4559700000	4334300000	4592300000	5523700000	5773300000	5609600000	2886700000	3986800000	3150300000	3126100000	3376400000	3353600000	2672100000	2936200000	3272800000	3518700000	2918600000	4821500000	4213100000	4416100000	4334400000	4405700000	4222600000
NP_001117890.1	NP_001117890.1	NP_001117890.1 clusterin-1 [Oncorhynchus mykiss]	0	0	0	0	0	0	0	0	0	0	0	0	0	0	0	0	0	0	0	0	5350000	4499500	5523600	5600900	4646400	4502100	4232500	0	4667000	3964000	4710900	4094900	5281500	4667900	0	4496100	5176300	0	0	4416400	0	3426800	4146500	3931200	4130700	0	3824200
NP_001117898.1	NP_001117898.1	NP_001117898.1 complement component C9 precursor [Oncorhynchus mykiss]	2118600000	2224800000	2105800000	2583300000	2853100000	2640900000	2630700000	2620200000	2185300000	1892000000	2007600000	2089200000	2254900000	2348700000	2374100000	2657600000	2393100000	2316800000	2280000000	1905100000	2571800000	1810500000	1619000000	2173000000	1680300000	2509000000	2140100000	3280500000	3526700000	3583700000	1241400000	1386200000	1129400000	1128000000	1274800000	978180000	1446200000	1733500000	1676900000	1810800000	644010000	1062100000	854550000	949680000	733830000	1791700000	1554400000
XP_021452379.1;XP_021451784.1;XP_021437205.1;NP_001117900.1	XP_021452379.1;XP_021451784.1;XP_021437205.1;NP_001117900.1	XP_021452379.1 ladderlectin-like [Oncorhynchus mykiss];XP_021451784.1 ladderlectin-like [Oncorhynchus mykiss];XP_021437205.1 ladderlectin-like [Oncorhynchus mykiss];NP_001117900.1 C-type MBL-2 protein precursor [Oncorhynchus mykiss]	0	0	0	0	0	0	0	0	0	0	0	0	0	0	0	0	0	0	0	0	135480000	149710000	148270000	0	0	123870000	153190000	228640000	137590000	161780000	0	0	0	0	0	0	0	0	0	0	0	0	0	0	0	0	0
NP_001117903.1	NP_001117903.1	NP_001117903.1 vitronectin protein 1 precursor [Oncorhynchus mykiss]	0	0	0	0	0	13011000	8103700	9524200	9107700	11034000	7421800	13103000	11213000	11437000	7429100	11977000	0	11074000	8092300	11543000	11785000	12495000	12935000	9664100	8565900	12408000	10059000	9689700	10519000	10532000	11879000	8767700	11340000	13644000	18329000	13667000	17843000	12696000	17908000	21050000	7258900	7029000	9695700	7862900	10583000	8453400	6099300
XP_021469261.1;XP_021469260.1;XP_021466896.1;NP_001117935.1	XP_021469261.1;XP_021469260.1;XP_021466896.1;NP_001117935.1	XP_021469261.1 uncharacterized protein LOC110530481 isoform X2 [Oncorhynchus mykiss];XP_021469260.1 uncharacterized protein LOC110530481 isoform X1 [Oncorhynchus mykiss];XP_021466896.1 cathelicidin antimicrobial peptide isoform X1 [Oncorhynchus mykiss];NP_001117935.1 cathelicidin antimicrobial peptide precursor [Oncorhynchus mykiss]	0	0	0	0	0	0	0	0	0	0	0	0	0	0	0	0	0	0	0	0	0	0	0	0	0	0	0	0	0	0	0	0	0	0	0	0	0	0	0	0	0	0	0	0	0	0	0
XP_021481504.1;NP_001117980.1	XP_021481504.1;NP_001117980.1	XP_021481504.1 metalloproteinase inhibitor 2-like [Oncorhynchus mykiss];NP_001117980.1 tissue inhibitor of metalloproteinase 2 precursor [Oncorhynchus mykiss]	0	0	0	0	0	0	0	0	0	0	0	0	0	0	0	0	0	0	0	0	0	0	0	0	0	0	0	0	0	0	0	0	0	0	0	0	0	0	0	0	0	0	0	0	0	0	0
NP_001117987.1;XP_021417863.1	NP_001117987.1;XP_021417863.1	NP_001117987.1 leukocyte elastase inhibitor [Oncorhynchus mykiss];XP_021417863.1 leukocyte elastase inhibitor isoform X1 [Oncorhynchus mykiss]	0	0	0	0	0	0	0	0	0	0	0	0	0	0	0	0	0	0	0	0	0	0	0	0	0	0	0	0	0	0	0	0	0	0	0	0	0	0	0	0	0	0	0	0	0	0	495090
NP_001118017.1	NP_001118017.1	NP_001118017.1 hemoglobin subunit beta-4 [Oncorhynchus mykiss]	124810000	93303000	0	0	0	38936000	21182000	92279000	32692000	94623000	1063500000	406420000	365160000	61777000	113140000	186200000	96951000	71906000	44392000	57624000	372360000	311860000	351670000	633870000	234530000	96428000	229390000	70503000	163420000	85858000	87064000	68472000	188750000	314240000	118400000	49337000	235500000	59619000	35834000	254800000	3070300000	181080000	153100000	86830000	180870000	114370000	152980000
XP_021480113.1;XP_021480112.1;XP_021480111.1;XP_021480110.1;XP_021480109.1;XP_021480105.1;XP_021480104.1;XP_021480103.1;XP_021480102.1;XP_021480101.1;XP_021480099.1;XP_021480098.1;XP_021480097.1;XP_021480096.1;XP_021480095.1;XP_021480093.1;NP_001118021.1;NP_001118020.1;NP_001118019.1;XP_021481573.1;XP_021480091.1;XP_021480108.1;XP_021480107.1;XP_021480100.1;XP_021480092.1	XP_021480113.1;XP_021480112.1;XP_021480111.1;XP_021480110.1;XP_021480109.1;XP_021480105.1;XP_021480104.1;XP_021480103.1;XP_021480102.1;XP_021480101.1;XP_021480099.1;XP_021480098.1;XP_021480097.1;XP_021480096.1;XP_021480095.1;XP_021480093.1;NP_001118021.1;NP_001118020.1;NP_001118019.1;XP_021481573.1;XP_021480091.1;XP_021480108.1;XP_021480107.1;XP_021480100.1;XP_021480092.1	XP_021480113.1 ferritin, middle subunit-like [Oncorhynchus mykiss];XP_021480112.1 ferritin, middle subunit-like [Oncorhynchus mykiss];XP_021480111.1 ferritin, middle subunit-like isoform X2 [Oncorhynchus mykiss];XP_021480110.1 ferritin, middle subunit-like isoform X1 [Oncorhynchus mykiss];XP_021480109.1 ferritin, middle subunit-like [Oncorhynchus mykiss];XP_021480105.1 ferritin, middle subunit-li…	0	0	4616300	0	0	0	0	0	0	0	0	0	0	0	0	0	0	0	0	0	0	0	0	0	0	0	0	0	0	0	0	0	0	0	0	0	0	0	0	0	0	0	0	0	0	0	0
NP_001118022.1;XP_021413558.1;XP_021481614.1	NP_001118022.1	NP_001118022.1 alpha-globin I [Oncorhynchus mykiss];	1074800000	733250000	725690000	398200000	517000000	363160000	180200000	789200000	250980000	512450000	3577100000	901830000	1011000000	224560000	250860000	705930000	310870000	352290000	184780000	251140000	944500000	734980000	731650000	1408300000	515750000	279930000	691900000	201030000	595000000	458710000	347880000	228120000	600080000	1108000000	428960000	200620000	1008700000	160810000	129160000	928700000	7361300000	545250000	444080000	230080000	482560000	356630000	570570000
XP_021480955.1;NP_001118023.1	XP_021480955.1;NP_001118023.1	XP_021480955.1 hemoglobin subunit alpha-1 [Oncorhynchus mykiss];NP_001118023.1 hemoglobin subunit alpha [Oncorhynchus mykiss]	856980000	438370000	394280000	239970000	290660000	237910000	107110000	457880000	123280000	361030000	2288900000	651570000	647710000	129430000	174470000	417180000	234440000	225940000	131140000	257070000	614530000	453160000	445060000	718410000	265360000	233110000	496560000	171250000	377310000	292070000	157740000	113310000	291980000	508890000	195290000	107360000	552070000	100950000	54472000	383310000	4200400000	307170000	277650000	147400000	165240000	207810000	349700000
NP_001118024.1	NP_001118024.1	NP_001118024.1 transferrin precursor [Oncorhynchus mykiss]	43846000000	40502000000	42971000000	41165000000	43385000000	43712000000	44049000000	47500000000	40182000000	43596000000	37084000000	36876000000	36692000000	39922000000	40666000000	36504000000	44539000000	38079000000	34421000000	33622000000	36004000000	36460000000	33618000000	34269000000	38232000000	32858000000	36762000000	39551000000	37942000000	41751000000	35674000000	38135000000	33811000000	34170000000	39222000000	35381000000	30733000000	35646000000	32914000000	28983000000	28482000000	35847000000	32363000000	32324000000	30666000000	32682000000	30930000000
NP_001118028.1	NP_001118028.1	NP_001118028.1 FBPL4 [Oncorhynchus mykiss]	36358000	33931000	38875000	39050000	32719000	32306000	28406000	27883000	29449000	33517000	109330000	92040000	95014000	94150000	94441000	75904000	44950000	77229000	93731000	99880000	66423000	72742000	67179000	72374000	63497000	50076000	48099000	55498000	55273000	55476000	31621000	25908000	27026000	31130000	32754000	33223000	25011000	31533000	29285000	28612000	70174000	72964000	60947000	52166000	63858000	49530000	42191000
NP_001118067.1	NP_001118067.1	NP_001118067.1 complement factor B [Oncorhynchus mykiss]	36088000	34915000	31035000	31672000	42244000	32650000	31393000	36333000	26621000	30743000	27231000	32771000	27695000	28857000	29115000	31654000	36280000	26863000	28050000	30658000	57206000	77547000	54847000	67012000	65163000	56694000	64951000	83742000	78136000	87124000	68272000	73222000	55165000	70051000	85859000	84483000	56834000	80176000	65270000	68360000	27442000	52711000	34444000	32954000	41963000	32285000	30773000
NP_001118072.1	NP_001118072.1	NP_001118072.1 zona pellucida glycoprotein 2.3 precursor [Oncorhynchus mykiss]	0	0	0	0	0	0	0	0	4156800	0	0	0	0	0	0	0	0	0	0	0	0	0	0	0	0	0	0	0	0	0	0	0	0	0	0	0	0	0	0	0	0	0	0	0	0	0	0
NP_001118073.1	NP_001118073.1	NP_001118073.1 differentially regulated trout protein 1 precursor [Oncorhynchus mykiss]	0	0	0	0	0	0	0	0	0	0	0	0	0	2640200	0	0	0	0	0	0	0	0	0	0	2261000	1726900	0	2719800	1839900	10917000	0	49151000	25592000	7784200	3470000	2569600	3436500	3226100	3534100	7948800	0	8358900	3447900	2286300	0	0	3188300
NP_001118079.1	NP_001118079.1	NP_001118079.1 complement component C8 beta chain precursor [Oncorhynchus mykiss]	336030000	347570000	326670000	350830000	363590000	338740000	360570000	380680000	337040000	311510000	261670000	261040000	305630000	301600000	305430000	338840000	288120000	321580000	344900000	305160000	375760000	352260000	383190000	406730000	453010000	328970000	340680000	390200000	446720000	429690000	361660000	286440000	218490000	265590000	272020000	243020000	247740000	263280000	399170000	422710000	316140000	385160000	246750000	343770000	414520000	403870000	391070000
NP_001118090.1	NP_001118090.1	NP_001118090.1 complement protein component C7-1 precursor [Oncorhynchus mykiss]	0	0	0	4346200	4351400	3975800	4719400	0	0	0	0	0	0	7225900	4178600	0	0	0	0	0	0	4545500	0	5742200	8809700	5670200	3944200	10664000	10533000	13236000	3689800	17429000	3668600	6121400	4171400	0	7117200	4959700	8131400	7589400	0	9925600	0	6075800	0	8292900	7091200
XP_021445886.1;NP_001118093.1;XP_021445887.1	XP_021445886.1;NP_001118093.1;XP_021445887.1	XP_021445886.1 complement component C6 isoform X1 [Oncorhynchus mykiss];NP_001118093.1 complement component C6 precursor [Oncorhynchus mykiss];XP_021445887.1 complement component C6 isoform X2 [Oncorhynchus mykiss]	789790000	808010000	821500000	951630000	1017800000	1052000000	1020400000	1089400000	976920000	976790000	526330000	598840000	644730000	758450000	892270000	885710000	1017600000	797100000	731050000	714910000	707910000	804700000	753660000	798430000	911680000	873510000	969000000	1011600000	1049700000	919240000	743240000	720740000	717480000	782950000	922800000	892520000	856720000	915960000	910400000	865390000	729140000	829520000	721920000	887680000	902530000	1056000000	952720000
NP_001118096.1	NP_001118096.1	NP_001118096.1 complement component C8 alpha chain precursor [Oncorhynchus mykiss]	269430000	271970000	259820000	271410000	293060000	282170000	277670000	275640000	273140000	234140000	232070000	227020000	262930000	257430000	270350000	293820000	344690000	265840000	298900000	276130000	275330000	298940000	287690000	304850000	307810000	260880000	277280000	338630000	354380000	344070000	297680000	264490000	179170000	216620000	243450000	230510000	234270000	322230000	349720000	352330000	301520000	310550000	237110000	281730000	275750000	371420000	354550000
NP_001118145.1	NP_001118145.1	NP_001118145.1 sex hormone-binding globulin beta form precursor [Oncorhynchus mykiss]	202710000	181260000	194810000	192760000	167160000	172670000	164970000	161390000	138010000	144840000	165420000	134380000	115330000	138770000	98698000	125580000	220160000	126500000	81663000	127840000	141760000	125170000	126730000	136600000	116300000	107060000	95657000	79431000	80482000	70487000	95102000	83362000	72846000	84002000	109230000	107110000	101210000	87738000	81782000	77395000	61429000	72132000	62532000	69091000	59449000	71325000	65219000
NP_001118165.1	NP_001118165.1	NP_001118165.1 ependymin-1 precursor [Oncorhynchus mykiss]	5903300	4183100	5032600	4817100	5009000	4724300	4022800	4042700	3758900	4259700	7601700	7224600	6113400	6032200	5834000	5432400	6537300	5882200	5878500	5274100	6798200	5399200	5377500	4609100	4408600	4248800	4306800	3679200	3664000	0	0	0	0	0	0	0	0	0	0	0	0	0	0	0	0	0	0
XP_021417519.1;NP_001118174.1	XP_021417519.1;NP_001118174.1	XP_021417519.1 SPARC-like [Oncorhynchus mykiss];NP_001118174.1 SPARC precursor [Oncorhynchus mykiss]	0	0	0	0	0	0	3599600	0	0	0	0	0	0	0	0	0	0	0	0	0	0	4039900	0	0	0	0	0	0	0	0	0	0	0	0	17046000	0	0	0	0	0	0	0	0	3471300	0	0	0
NP_001118176.1	NP_001118176.1	NP_001118176.1 cystatin precursor [Oncorhynchus mykiss]	51688000	44275000	35646000	24668000	24555000	25868000	37584000	38582000	50273000	35442000	34331000	40571000	33056000	29083000	26226000	41327000	4295100	35613000	30191000	37181000	66016000	49731000	59648000	37962000	30506000	66819000	62137000	52436000	40409000	59060000	58833000	40110000	42889000	28351000	25582000	31471000	72302000	49719000	46665000	44809000	28895000	41572000	55926000	38408000	19726000	36138000	49361000
NP_001118218.1;NP_001118179.1;XP_021463912.1;XP_021464530.1	NP_001118218.1;NP_001118179.1;XP_021463912.1;XP_021464530.1	NP_001118218.1 signal transducer/activator of transcription [Oncorhynchus mykiss];NP_001118179.1 signal transducer/activator of transcription [Oncorhynchus mykiss];XP_021463912.1 signal transducer/activator of transcription isoform X1 [Oncorhynchus mykiss];XP_021464530.1 uncharacterized protein LOC110527523 [Oncorhynchus mykiss]	0	0	0	0	0	0	0	0	0	0	0	0	0	0	0	0	0	0	0	0	0	0	0	0	0	0	0	0	0	0	0	0	0	0	0	0	0	0	0	0	0	0	0	0	0	0	0
NP_001118183.1;XP_021460613.1	NP_001118183.1;XP_021460613.1	NP_001118183.1 cathepsin D precursor [Oncorhynchus mykiss];XP_021460613.1 cathepsin D isoform X1 [Oncorhynchus mykiss]	0	0	0	0	0	0	0	0	0	0	0	0	0	0	0	0	0	0	0	0	0	0	0	0	0	0	0	0	0	0	0	0	0	0	0	0	0	0	0	0	0	0	0	0	0	0	1557500
XP_021457257.1;NP_001118188.1	XP_021457257.1;NP_001118188.1	XP_021457257.1 lysozyme C II [Oncorhynchus mykiss];NP_001118188.1 lysozyme C II precursor [Oncorhynchus mykiss]	27758000	54334000	78547000	144460000	233600000	327750000	368020000	362070000	258700000	236640000	47232000	86061000	188660000	180760000	231080000	299430000	445480000	301360000	268680000	227450000	50415000	89781000	104260000	169170000	331010000	551830000	573790000	625540000	746020000	706140000	119520000	320500000	415220000	274250000	267770000	236550000	227380000	314010000	290530000	297730000	66786000	203980000	230670000	195630000	173850000	161510000	197000000
NP_001118193.1;XP_021435745.1	NP_001118193.1	NP_001118193.1 pentraxin precursor [Oncorhynchus mykiss]	130890000	122930000	102600000	94782000	116060000	140980000	134150000	162590000	114520000	106380000	97638000	92070000	72343000	83903000	92189000	114320000	133460000	143460000	127360000	124150000	220780000	189060000	136360000	99757000	115000000	188940000	149910000	108270000	140140000	116150000	77068000	60512000	107390000	102530000	170050000	132450000	110750000	136770000	96751000	103460000	93700000	114720000	87903000	93834000	95490000	86673000	70472000
XP_021454542.1;XP_021473197.1;XP_021473190.1;XP_021473181.1;NP_001123462.1;XP_021454537.1	XP_021454542.1;XP_021473197.1;XP_021473190.1;XP_021473181.1;NP_001123462.1;XP_021454537.1	XP_021454542.1 troponin I, fast skeletal muscle-like [Oncorhynchus mykiss];XP_021473197.1 troponin I isoform X2 [Oncorhynchus mykiss];XP_021473190.1 troponin I isoform X1 [Oncorhynchus mykiss];XP_021473181.1 troponin I isoform X1 [Oncorhynchus mykiss];NP_001123462.1 troponin I [Oncorhynchus mykiss];XP_021454537.1 troponin I, fast skeletal muscle-like [Oncorhynchus mykiss]	0	0	0	0	0	0	0	0	0	0	0	0	0	0	0	0	0	0	0	0	0	0	0	0	0	0	0	0	0	0	0	0	0	0	0	0	0	0	0	0	0	0	0	0	0	0	0
NP_001153946.1;XP_021424439.1;XP_021424438.1	NP_001153946.1;XP_021424439.1;XP_021424438.1	NP_001153946.1 gastric chitinase precursor [Oncorhynchus mykiss];XP_021424439.1 acidic mammalian chitinase-like [Oncorhynchus mykiss];XP_021424438.1 acidic mammalian chitinase-like [Oncorhynchus mykiss]	0	2064000	0	0	1936000	2008100	1621800	0	0	0	0	0	0	0	0	0	0	0	0	0	0	0	0	0	0	0	0	0	0	0	0	0	0	0	0	0	0	0	0	0	0	1499600	0	1986600	0	1608100	1343400
NP_001153952.1	NP_001153952.1	NP_001153952.1 mannan-binding lectin H2 precursor [Oncorhynchus mykiss]	1780900000	1464800000	1483900000	1310200000	1276400000	1312400000	1177100000	1309200000	1132200000	1159200000	1028700000	945180000	885360000	828570000	758750000	765400000	1210800000	930260000	875010000	780100000	1470900000	1337200000	1074500000	923990000	873730000	826070000	825340000	732790000	788520000	596640000	1445100000	1305400000	1132100000	1045400000	1248300000	1260200000	1143600000	1407300000	1336400000	962870000	1128300000	1205000000	968040000	900500000	987640000	992970000	943910000
NP_001153967.1;XP_021417877.1;NP_001118105.1	NP_001153967.1	NP_001153967.1 C type lectin receptor B [Oncorhynchus mykiss]	692140000	751550000	854730000	909840000	1605700000	1477700000	1913100000	2143100000	1954000000	1469000000	916900000	1367300000	1231000000	2228800000	2953800000	2676100000	3894000000	2681900000	2502500000	2122700000	1505000000	1607800000	1442800000	1992800000	3304200000	4004200000	3731700000	5547600000	4980600000	5419500000	1778900000	2565900000	2788100000	2499000000	2795600000	2803600000	2851100000	3293700000	2566100000	2187700000	2172800000	2882300000	2635200000	2944000000	2629900000	2846900000	3270700000
XP_021447852.1;XP_021416324.1;NP_001153991.1;XP_021427357.1	XP_021447852.1;XP_021416324.1;NP_001153991.1;XP_021427357.1	XP_021447852.1 40S ribosomal protein S5 [Oncorhynchus mykiss];XP_021416324.1 40S ribosomal protein S5 [Oncorhynchus mykiss];NP_001153991.1 40S ribosomal protein S5 [Oncorhynchus mykiss];XP_021427357.1 40S ribosomal protein S5 [Oncorhynchus mykiss]	0	0	0	0	0	0	0	0	0	0	0	0	0	0	0	0	0	0	0	0	0	0	0	0	0	0	0	0	0	0	0	0	0	0	0	0	0	0	0	0	0	0	0	0	0	0	0
NP_001154031.1	NP_001154031.1	NP_001154031.1 Glutathione S-transferase A [Oncorhynchus mykiss]	0	0	0	0	0	0	0	0	0	0	0	0	0	0	0	0	0	0	0	0	0	0	0	0	0	0	0	0	0	0	0	0	0	0	0	0	0	0	0	0	0	0	0	0	0	0	0
NP_001154036.1	NP_001154036.1	NP_001154036.1 hemoglobin subunit alpha-4 [Oncorhynchus mykiss]	43284000	29545000	24852000	13980000	0	20433000	0	48477000	0	31567000	250180000	50300000	66087000	16129000	11446000	36457000	0	0	0	12249000	76027000	59566000	58947000	99350000	43001000	21695000	62980000	0	44487000	33200000	25356000	15538000	34940000	56867000	28923000	0	50311000	0	0	58741000	430080000	30754000	29984000	16823000	23028000	19789000	32339000
NP_001154148.1	NP_001154148.1	NP_001154148.1 epididymal secretory protein E1 precursor [Oncorhynchus mykiss]	0	0	0	0	0	0	0	0	0	0	0	0	0	0	0	0	0	0	0	0	0	0	0	0	0	0	0	0	0	0	0	0	0	0	0	0	0	0	0	0	0	0	1277000	0	0	0	0
XP_021449713.1;XP_021449712.1;NP_001154161.1;XP_021449624.1;XP_021449711.1	XP_021449713.1;XP_021449712.1;NP_001154161.1;XP_021449624.1;XP_021449711.1	XP_021449713.1 small inducible cytokine A13 isoform X3 [Oncorhynchus mykiss];XP_021449712.1 small inducible cytokine A13 isoform X2 [Oncorhynchus mykiss];NP_001154161.1 Small inducible cytokine A13 precursor [Oncorhynchus mykiss];XP_021449624.1 C-C motif chemokine 13-like [Oncorhynchus mykiss];XP_021449711.1 small inducible cytokine A13 isoform X1 [Oncorhynchus mykiss]	0	0	0	0	0	0	0	0	0	0	0	0	0	0	0	0	0	0	0	0	0	0	0	0	0	0	0	0	0	0	0	0	0	0	0	0	0	0	0	0	0	0	0	0	0	0	0
NP_001154920.1	NP_001154920.1	NP_001154920.1 apolipoprotein A-II precursor [Oncorhynchus mykiss]	26222000000	22069000000	21945000000	20974000000	17489000000	18429000000	19114000000	21400000000	18585000000	23371000000	23513000000	23961000000	22814000000	21352000000	18183000000	19131000000	6406000000	19129000000	17490000000	22897000000	35850000000	27304000000	28014000000	25497000000	23606000000	26065000000	21212000000	18125000000	17634000000	17861000000	19686000000	17147000000	13951000000	15125000000	15294000000	14446000000	16658000000	15916000000	16901000000	15031000000	16810000000	19426000000	17697000000	17366000000	19195000000	18847000000	17359000000
NP_001158580.1	NP_001158580.1	NP_001158580.1 heme-binding protein 2 precursor [Oncorhynchus mykiss]	540440000	607260000	575080000	492000000	422170000	446930000	473090000	558590000	736250000	673220000	346250000	495300000	462150000	461090000	361290000	322740000	700240000	423110000	493990000	578660000	596470000	442230000	656400000	518660000	493670000	633090000	449620000	349040000	326610000	372260000	901270000	723110000	921520000	798690000	514150000	604890000	1244200000	931360000	792310000	1000500000	372740000	382680000	619990000	569400000	567160000	559070000	617300000
XP_021459419.1;XP_021459418.1;NP_001158591.1	XP_021459419.1;XP_021459418.1;NP_001158591.1	XP_021459419.1 cold-inducible RNA-binding protein B-like isoform X2 [Oncorhynchus mykiss];XP_021459418.1 cold-inducible RNA-binding protein B-like isoform X1 [Oncorhynchus mykiss];NP_001158591.1 cold inducible RNA binding protein [Oncorhynchus mykiss]	0	0	0	0	0	0	0	0	0	0	0	0	0	0	0	0	0	0	0	0	0	0	0	0	0	0	0	0	0	0	0	0	0	0	0	0	0	0	0	0	1154700	0	0	0	0	0	0
NP_001158613.1;XP_021432343.1;XP_021432334.1;XP_021450791.1;XP_021432350.1	NP_001158613.1;XP_021432343.1;XP_021432334.1	NP_001158613.1 Carboxypeptidase A1 precursor [Oncorhynchus mykiss];XP_021432343.1 carboxypeptidase A1-like isoform X2 [Oncorhynchus mykiss];XP_021432334.1 carboxypeptidase A1-like isoform X1 [Oncorhynchus mykiss]	0	0	0	0	8490500	9336700	10855000	25315000	17767000	24609000	0	0	0	0	8458800	10449000	13825000	9688400	9900000	0	0	0	0	0	0	0	0	0	0	0	0	0	0	0	0	0	0	0	0	0	0	0	0	0	0	0	0
XP_021411842.1;NP_001158696.1	XP_021411842.1;NP_001158696.1	XP_021411842.1 nucleoside diphosphate kinase B isoform X1 [Oncorhynchus mykiss];NP_001158696.1 Nucleoside diphosphate kinase B [Oncorhynchus mykiss]	0	0	0	0	0	0	0	0	0	0	0	0	0	0	0	0	0	0	0	0	0	0	0	0	0	0	0	0	0	0	0	0	0	0	0	0	0	0	0	0	0	0	0	0	0	0	0
NP_001233251.1	NP_001233251.1	NP_001233251.1 properdin P factor complement 2 precursor [Oncorhynchus mykiss]	31636000	43044000	41695000	35983000	35835000	37614000	37412000	33358000	35469000	35321000	24199000	31784000	31948000	34335000	39341000	34394000	45133000	37725000	35032000	29434000	30392000	36532000	30366000	36073000	23272000	36372000	35955000	37034000	46831000	39416000	23267000	28430000	24718000	18301000	29260000	22532000	25934000	27842000	30542000	20888000	33659000	37570000	39399000	35331000	30855000	42686000	36289000
NP_001233271.1;XP_021466928.1;XP_021466927.1;XP_021466926.1;XP_021466929.1;XP_021466930.1	NP_001233271.1;XP_021466928.1;XP_021466927.1;XP_021466926.1;XP_021466929.1;XP_021466930.1	NP_001233271.1 complement factor B/C2 precursor [Oncorhynchus mykiss];XP_021466928.1 complement factor B/C2 isoform X3 [Oncorhynchus mykiss];XP_021466927.1 complement factor B/C2 isoform X2 [Oncorhynchus mykiss];XP_021466926.1 complement factor B/C2 isoform X1 [Oncorhynchus mykiss];XP_021466929.1 complement factor B/C2 isoform X4 [Oncorhynchus mykiss];XP_021466930.1 complement factor B/C2 isoform…	233050000	299420000	287820000	259390000	297770000	279880000	305970000	284120000	219550000	225160000	251260000	369170000	381040000	345230000	364900000	327890000	372750000	300680000	325310000	273770000	154290000	219170000	184170000	170140000	209000000	193150000	193460000	298790000	314520000	280570000	169660000	212430000	183860000	166470000	165260000	163530000	141640000	154250000	176480000	162640000	209600000	303480000	300590000	265380000	258360000	231110000	208290000
NP_001233280.1	NP_001233280.1	NP_001233280.1 serine (or cysteine) peptidase inhibitor, clade F, member 2b [Oncorhynchus mykiss]	0	0	0	0	0	0	0	2868100	0	2576400	0	0	0	0	0	0	0	0	0	0	44621000	50264000	43486000	40667000	4485300	86816000	33233000	0	0	21942000	35034000	30058000	28412000	31195000	44231000	45728000	23449000	26632000	37457000	25373000	22699000	32656000	29034000	26609000	22442000	20380000	0
XP_021411831.1;NP_001118189.1	XP_021411831.1;NP_001118189.1	XP_021411831.1 band 3 anion exchange protein isoform X1 [Oncorhynchus mykiss];NP_001118189.1 band 3 anion exchange protein [Oncorhynchus mykiss]	0	0	0	0	0	0	0	0	0	0	0	0	0	0	0	6434600	0	0	0	0	0	0	0	7204300	0	0	0	0	0	0	0	0	0	0	0	0	0	0	0	8968900	11994000	0	0	0	2066200	0	0
XP_021411869.1;XP_021411873.1;XP_021437910.1	XP_021411869.1;XP_021411873.1	XP_021411869.1 beta-Ala-His dipeptidase-like isoform X1 [Oncorhynchus mykiss];XP_021411873.1 beta-Ala-His dipeptidase-like isoform X2 [Oncorhynchus mykiss]	95181000	99095000	91077000	84640000	77298000	73845000	70304000	59444000	70219000	60398000	88944000	92344000	80751000	75894000	70709000	67430000	5783700	71070000	78410000	78841000	70855000	76592000	61571000	59997000	49583000	42865000	39075000	32819000	30368000	26799000	92225000	94584000	92916000	88763000	97009000	102230000	80932000	106510000	102590000	57584000	109280000	77959000	69946000	75361000	84656000	67608000	72057000
XP_021411881.1;XP_021448172.1	XP_021411881.1;XP_021448172.1	XP_021411881.1 cytosolic non-specific dipeptidase-like [Oncorhynchus mykiss];XP_021448172.1 cytosolic non-specific dipeptidase-like [Oncorhynchus mykiss]	0	0	0	0	0	0	0	0	0	0	0	0	0	0	0	0	4945200	0	0	0	0	0	0	0	0	0	0	0	0	0	4865200	5051000	4852200	0	0	0	5908300	4571100	0	3812300	0	0	0	4029600	0	0	4643400
XP_021411950.1	XP_021411950.1	XP_021411950.1 uncharacterized protein LOC110485215 [Oncorhynchus mykiss]	0	2367600	2876400	2876800	0	0	4919800	1801000	8267900	4860800	8119500	21709000	9317500	6829200	15002000	8414500	7164000	7218500	5399600	5917700	0	0	2564900	2613800	2865100	5886600	3114100	3781500	0	2433700	28875000	25843000	31833000	25064000	32415000	37934000	49680000	46589000	49895000	33918000	12613000	11319000	11726000	0	0	0	15433000
XP_021412208.1;XP_021449908.1	XP_021412208.1;XP_021449908.1	XP_021412208.1 cartilage acidic protein 1 [Oncorhynchus mykiss];XP_021449908.1 cartilage acidic protein 1-like, partial [Oncorhynchus mykiss]	0	0	0	3762000	3862900	3650200	0	0	0	4160400	0	0	3467200	0	0	0	0	0	0	0	4131600	0	0	0	3795900	0	0	0	0	0	0	0	0	3194700	0	0	0	0	0	0	0	3130500	2735900	3145700	0	3401200	0
XP_021412335.1	XP_021412335.1	XP_021412335.1 complement C3-like [Oncorhynchus mykiss]	697560000	611400000	655210000	769070000	831360000	888010000	876500000	914370000	784620000	850800000	648970000	649730000	679200000	782410000	772960000	711540000	1154100000	762990000	669450000	728600000	682490000	663420000	657180000	688170000	824910000	996440000	979790000	885420000	959350000	997210000	862940000	826380000	986200000	872590000	979410000	966210000	944040000	961340000	716470000	674790000	399630000	512690000	542440000	582250000	544970000	625620000	642700000
XP_021412386.1	XP_021412386.1	XP_021412386.1 aspartate aminotransferase, cytoplasmic-like [Oncorhynchus mykiss]	0	0	0	0	0	0	0	0	0	0	0	0	1867500	0	0	0	0	0	0	0	1927400	0	0	1604700	2344900	2109400	2146600	2853200	2535800	2089900	0	0	1908100	0	0	0	0	0	0	0	1894900	0	0	2211400	0	0	0
XP_021412446.1;XP_021412440.1;XP_021412445.1;XP_021412444.1;XP_021412439.1	XP_021412446.1;XP_021412440.1;XP_021412445.1;XP_021412444.1;XP_021412439.1	XP_021412446.1 uncharacterized protein LOC110485666 isoform X3 [Oncorhynchus mykiss];XP_021412440.1 uncharacterized protein LOC110485664 isoform X2 [Oncorhynchus mykiss];XP_021412445.1 uncharacterized protein LOC110485666 isoform X2 [Oncorhynchus mykiss];XP_021412444.1 uncharacterized protein LOC110485666 isoform X1 [Oncorhynchus mykiss];XP_021412439.1 uncharacterized protein LOC110485664 isoform…	0	0	6762900	11744000	32180000	28060000	25116000	22079000	11159000	14019000	0	0	10588000	16504000	27201000	17954000	2854700	14343000	8920700	8713000	0	10807000	0	17847000	30850000	24315000	20977000	41017000	37757000	59252000	0	45680000	24211000	22836000	15106000	11846000	8145300	0	0	7637200	0	36204000	23083000	21100000	16595000	19676000	18717000
XP_021423396.1;XP_021412504.1;XP_021412503.1;XP_021412502.1;XP_021412501.1;NP_001158660.1	XP_021423396.1;XP_021412504.1;XP_021412503.1;XP_021412502.1;XP_021412501.1	XP_021423396.1 peroxiredoxin-1-like [Oncorhynchus mykiss];XP_021412504.1 peroxiredoxin-1-like [Oncorhynchus mykiss];XP_021412503.1 peroxiredoxin-1-like [Oncorhynchus mykiss];XP_021412502.1 peroxiredoxin-1-like [Oncorhynchus mykiss];XP_021412501.1 peroxiredoxin-1-like [Oncorhynchus mykiss]	0	0	0	0	0	0	0	0	0	0	0	3757600	0	0	0	0	0	0	0	0	0	0	0	0	0	0	0	0	0	0	0	0	0	0	0	0	0	0	0	0	22993000	0	0	0	0	0	0
XP_021480992.1;XP_021423566.1;XP_021412649.1;XP_021423565.1;XP_021423564.1;XP_021412648.1	XP_021480992.1;XP_021423566.1;XP_021412649.1;XP_021423565.1;XP_021423564.1;XP_021412648.1	XP_021480992.1 40S ribosomal protein SA-like [Oncorhynchus mykiss];XP_021423566.1 40S ribosomal protein SA isoform X2 [Oncorhynchus mykiss];XP_021412649.1 40S ribosomal protein SA isoform X2 [Oncorhynchus mykiss];XP_021423565.1 40S ribosomal protein SA isoform X1 [Oncorhynchus mykiss];XP_021423564.1 40S ribosomal protein SA isoform X1 [Oncorhynchus mykiss];XP_021412648.1 40S ribosomal protein SA …	0	0	0	0	0	0	0	0	0	0	0	0	0	0	0	0	0	0	0	0	0	0	0	0	0	0	0	0	0	0	0	0	0	0	0	0	0	0	0	0	2922400	0	0	0	0	0	0
XP_021480982.1;XP_021480981.1;XP_021423608.1;XP_021413832.1;XP_021412707.1;XP_021428433.1	XP_021480982.1;XP_021480981.1;XP_021423608.1;XP_021413832.1;XP_021412707.1;XP_021428433.1	XP_021480982.1 ATP-dependent RNA helicase DDX39A-like [Oncorhynchus mykiss];XP_021480981.1 ATP-dependent RNA helicase DDX39A-like [Oncorhynchus mykiss];XP_021423608.1 ATP-dependent RNA helicase DDX39A [Oncorhynchus mykiss];XP_021413832.1 ATP-dependent RNA helicase DDX39A-like [Oncorhynchus mykiss];XP_021412707.1 ATP-dependent RNA helicase DDX39A-like [Oncorhynchus mykiss];XP_021428433.1 spliceoso…	0	0	0	0	0	0	0	0	0	0	0	0	0	0	0	0	0	0	0	0	0	0	0	0	0	0	0	0	0	0	0	0	0	0	0	0	0	0	0	0	5224300	0	0	0	0	0	0
XP_021412922.1	XP_021412922.1	XP_021412922.1 beta-2-glycoprotein 1-like [Oncorhynchus mykiss]	165680000	241220000	202960000	175200000	173820000	162050000	189010000	185900000	166090000	179110000	184350000	276380000	234700000	260040000	292810000	235500000	291170000	194500000	210010000	190580000	213300000	249980000	307110000	397810000	499850000	240990000	210980000	295940000	332590000	340290000	195290000	193440000	192860000	210070000	192690000	171390000	132740000	217800000	311900000	502590000	180710000	231940000	159150000	187820000	304790000	232520000	237830000
XP_021412923.1	XP_021412923.1	>XP_021412923.1 beta-2-glycoprotein 1-like [Oncorhynchus mykiss]	715280000	606940000	611780000	634510000	585810000	630930000	589270000	571870000	504170000	551810000	739930000	730740000	709450000	749740000	796320000	801950000	585730000	738420000	701040000	674200000	583480000	577290000	539700000	576160000	614590000	592840000	606980000	602260000	591800000	610290000	600640000	627650000	567140000	557500000	740270000	646710000	599350000	634870000	670460000	618720000	508470000	646570000	536120000	573900000	545460000	639180000	677870000
XP_021413019.1	XP_021413019.1	XP_021413019.1 complement C3-like [Oncorhynchus mykiss]	603530000	880050000	940020000	1048500000	1277900000	1166800000	1243200000	1271100000	1077500000	986610000	815900000	1057300000	1113400000	1150000000	1355900000	1258300000	1559800000	1178100000	1071600000	888330000	1796400000	2176600000	1985000000	2087700000	2317600000	2475400000	2886400000	3589900000	3521000000	3412500000	882270000	1019700000	917410000	987890000	1066400000	1021200000	1000500000	1085200000	1079300000	1157400000	1461900000	1651900000	1495400000	1715200000	1608200000	1872400000	1694700000
XP_021423888.1;XP_021413025.1;XP_021419977.1;XP_021419969.1	XP_021423888.1;XP_021413025.1	XP_021423888.1 catalase-like [Oncorhynchus mykiss];XP_021413025.1 catalase-like [Oncorhynchus mykiss]	0	0	0	0	0	0	0	0	0	0	0	0	0	0	0	0	0	0	0	0	0	0	0	0	0	0	0	0	0	0	0	0	0	0	0	0	0	0	0	0	11819000	0	0	0	0	0	0
XP_021413174.1;XP_021480223.1	XP_021413174.1	XP_021413174.1 cathepsin D-like [Oncorhynchus mykiss]	0	0	0	0	0	0	0	0	0	0	0	0	0	0	0	0	0	0	0	0	3472900	0	2923500	2513700	2773800	1677900	0	2277600	1883200	0	0	0	0	0	0	0	0	0	0	0	0	3697400	3500600	3065900	3859900	0	0
XP_021413529.1	XP_021413529.1	XP_021413529.1 insulin-like growth factor-binding protein complex acid labile subunit [Oncorhynchus mykiss]	247610000	222780000	234000000	212480000	207880000	221290000	202190000	212980000	213530000	206640000	226990000	215560000	181930000	216050000	221360000	184290000	55660000	204810000	217830000	220350000	221860000	252710000	213880000	183960000	178530000	183130000	192460000	206380000	203490000	196200000	262700000	238080000	253950000	255960000	279070000	290880000	210640000	314370000	275390000	199160000	220990000	238050000	197070000	173570000	190660000	180490000	165100000
XP_021413547.1	XP_021413547.1	XP_021413547.1 hemoglobin subunit alpha-like [Oncorhynchus mykiss]	0	0	0	0	0	0	0	0	0	0	0	0	0	0	0	0	0	0	0	0	0	0	0	0	0	0	0	0	0	0	0	0	0	0	0	0	0	0	0	0	0	0	0	0	0	0	0
XP_021413548.1	XP_021413548.1	XP_021413548.1 hemoglobin subunit beta [Oncorhynchus mykiss]	0	0	1507200	2008400	1250600	0	0	1966800	0	0	22631000	8683700	0	1373100	0	2911000	0	0	0	0	3693600	2877000	3150500	11698000	1889200	996890	2074500	0	0	994280	2203300	1882200	13041000	18797000	3422300	1733800	3728800	1608400	0	8699000	192920000	12368000	2625700	1675100	6240600	1803400	3162100
XP_021413549.1;XP_021413546.1	XP_021413549.1;XP_021413546.1	XP_021413549.1 hemoglobin subunit beta-1-like [Oncorhynchus mykiss];XP_021413546.1 hemoglobin subunit beta-1-like [Oncorhynchus mykiss]	2468600000	1307500000	1169900000	664550000	865010000	658140000	340110000	1294400000	351900000	1185200000	5668300000	2146700000	2018400000	475090000	563100000	1246700000	681410000	689380000	346830000	644980000	1928700000	1440900000	1541100000	2847100000	1010900000	554180000	1475000000	472340000	1109800000	764890000	446440000	299070000	1018600000	1537500000	682820000	327700000	1518100000	422520000	186130000	1286100000	16269000000	966800000	881920000	460930000	787690000	638430000	1120200000
XP_021413550.1	XP_021413550.1	XP_021413550.1 hemoglobin subunit alpha-4-like [Oncorhynchus mykiss]	0	0	0	0	0	0	0	0	0	0	0	0	0	0	0	0	0	0	0	0	0	0	0	0	0	0	0	0	0	0	0	0	0	0	0	0	0	0	0	0	37713000	0	0	0	0	0	0
XP_021413552.1	XP_021413552.1	XP_021413552.1 hemoglobin subunit alpha [Oncorhynchus mykiss]	411090000	225270000	163490000	112690000	129650000	124370000	65672000	206290000	65967000	195590000	1030300000	323970000	338440000	71684000	88245000	189790000	97482000	110780000	53658000	102750000	467770000	319310000	253360000	493120000	176850000	140030000	297690000	107750000	257090000	188170000	91554000	63823000	165830000	272860000	114140000	59031000	311420000	73974000	36049000	252890000	3864700000	204760000	179660000	96570000	153120000	167640000	286810000
XP_021413598.1	XP_021413598.1	XP_021413598.1 microfibril-associated glycoprotein 4-like [Oncorhynchus mykiss]	6503100	8691800	11824000	17672000	66552000	64706000	67464000	60311000	45015000	33537000	0	13749000	32722000	45805000	71333000	51425000	102120000	83380000	87936000	59860000	10938000	18577000	0	34635000	88032000	89598000	95411000	104070000	85247000	89545000	27154000	44823000	40363000	43027000	40523000	47388000	31308000	31794000	29734000	23763000	24302000	30739000	21957000	28705000	43451000	40319000	46735000
XP_021481234.1;XP_021414105.1	XP_021481234.1;XP_021414105.1	XP_021481234.1 coronin-1A-like [Oncorhynchus mykiss];XP_021414105.1 coronin-1A-like [Oncorhynchus mykiss]	0	0	0	0	0	0	0	0	0	0	0	0	0	0	0	0	0	0	0	0	0	0	0	0	0	0	0	0	0	0	0	0	0	0	0	0	0	0	0	0	0	0	0	0	0	0	0
XP_021481429.1;XP_021481428.1;XP_021451279.1;XP_021414353.1;XP_021414352.1;NP_001182339.1;XP_021449367.1	XP_021481429.1;XP_021481428.1;XP_021451279.1;XP_021414353.1;XP_021414352.1;NP_001182339.1;XP_021449367.1	XP_021481429.1 parvalbumin beta 1 [Oncorhynchus mykiss];XP_021481428.1 parvalbumin beta 1 [Oncorhynchus mykiss];XP_021451279.1 parvalbumin beta 1 [Oncorhynchus mykiss];XP_021414353.1 parvalbumin beta 1 [Oncorhynchus mykiss];XP_021414352.1 parvalbumin beta 1 [Oncorhynchus mykiss];NP_001182339.1 parvalbumin isoform 1d [Oncorhynchus mykiss];XP_021449367.1 parvalbumin beta 1-like [Oncorhynchus mykiss]	32561000	39467000	70301000	23827000	0	16889000	25713000	23495000	7735200	20416000	204920000	87758000	15652000	16016000	20777000	14855000	10649000	6492600	8023800	39010000	53239000	35039000	8626500	0	11659000	12909000	117850000	11014000	0	28050000	0	12697000	3898800	95325000	5563100	4993100	16323000	0	0	28189000	107900000	14104000	11891000	8931400	11028000	0	53428000
XP_021414417.1;XP_021414425.1	XP_021414417.1;XP_021414425.1	XP_021414417.1 uncharacterized protein LOC110486889 isoform X1 [Oncorhynchus mykiss];XP_021414425.1 uncharacterized protein LOC110486889 isoform X2 [Oncorhynchus mykiss]	15353000	16628000	24363000	24421000	22640000	27303000	20569000	22162000	23012000	23495000	6066700	8402400	7809600	8184700	10430000	14610000	6558600	6479400	7210600	9979600	27693000	35524000	32369000	31528000	36517000	35993000	36578000	34280000	38047000	47292000	53777000	55368000	55782000	52814000	66871000	69847000	59012000	66224000	59892000	55164000	0	3255600	4659200	4622000	5178500	6511100	8746800
XP_021448169.1;XP_021414491.1;XP_021411984.1	XP_021448169.1;XP_021414491.1;XP_021411984.1	XP_021448169.1 coagulation factor X-like [Oncorhynchus mykiss];XP_021414491.1 coagulation factor X-like [Oncorhynchus mykiss];XP_021411984.1 coagulation factor X-like [Oncorhynchus mykiss]	16686000	17786000	17821000	16172000	14606000	17029000	19309000	19628000	18322000	19902000	22959000	20861000	18457000	19758000	13959000	18317000	27535000	21073000	24341000	21950000	18786000	19379000	16816000	13594000	12888000	13608000	12751000	10717000	15206000	13050000	21987000	19982000	15296000	20315000	18971000	18564000	16822000	20747000	20997000	17534000	21082000	18443000	17676000	16119000	16834000	13858000	14993000
XP_021414649.1;XP_021414647.1;XP_021414646.1	XP_021414649.1;XP_021414647.1;XP_021414646.1	XP_021414649.1 galectin-3-binding protein A-like [Oncorhynchus mykiss];XP_021414647.1 galectin-3-binding protein A-like isoform X2 [Oncorhynchus mykiss];XP_021414646.1 galectin-3-binding protein A-like isoform X1 [Oncorhynchus mykiss]	0	5905700	8282300	7259600	8306000	8168900	6778900	6858000	8644200	9365600	4360900	0	5607900	0	0	5583600	0	4582600	0	4271100	9427900	9550500	8319600	6070400	8889300	7681500	7928200	7603700	7668500	7620800	6793200	0	0	6843000	0	0	5070600	5874000	8134100	6541500	0	7266900	0	6000300	7234600	0	5828600
XP_021414831.1;XP_021414835.1	XP_021414831.1;XP_021414835.1	XP_021414831.1 CREB-binding protein-like [Oncorhynchus mykiss];XP_021414835.1 LOW QUALITY PROTEIN: CREB-binding protein-like, partial [Oncorhynchus mykiss]	0	0	0	0	0	0	0	0	0	0	0	0	0	0	0	0	0	0	0	0	0	0	0	0	0	0	0	0	0	0	0	0	0	0	0	0	0	0	0	0	0	0	0	0	0	0	0
XP_021414840.1;XP_021449631.1	XP_021414840.1	XP_021414840.1 cathepsin S-like [Oncorhynchus mykiss]	48984000	50847000	44953000	35447000	33668000	36440000	32107000	37994000	27956000	35984000	24652000	25911000	17405000	17012000	14973000	15400000	31958000	17966000	22892000	20095000	27874000	33019000	25237000	24075000	24598000	27899000	28375000	29341000	29440000	25143000	34667000	29411000	33064000	31697000	36870000	36096000	28113000	39220000	26689000	24547000	19114000	20175000	17091000	16798000	18318000	17752000	18034000
XP_021415092.1;XP_021415090.1	XP_021415092.1;XP_021415090.1	XP_021415092.1 immunoglobulin lambda-1 light chain-like isoform X2 [Oncorhynchus mykiss];XP_021415090.1 immunoglobulin lambda-1 light chain-like isoform X1 [Oncorhynchus mykiss]	0	0	0	0	0	0	0	0	0	0	0	0	0	0	0	0	0	0	0	0	0	0	0	0	0	0	0	0	0	0	0	0	0	0	0	0	0	0	0	0	0	0	2329000	2911700	2470600	2456400	2632300
XP_021415094.1	XP_021415094.1	XP_021415094.1 immunoglobulin lambda-1 light chain-like [Oncorhynchus mykiss]	12162000	11755000	0	11899000	12157000	15453000	0	43942000	0	22565000	0	0	0	0	0	0	0	0	0	7743900	0	0	0	0	0	0	5661300	0	6651400	4688400	0	0	0	0	0	0	18260000	34392000	52367000	43811000	0	0	0	0	0	0	0
XP_021415282.1	XP_021415282.1	XP_021415282.1 type-4 ice-structuring protein LS-12-like [Oncorhynchus mykiss]	0	10364000	11859000	15375000	12140000	16341000	12500000	11528000	10168000	13040000	26454000	15677000	21401000	28742000	18785000	22463000	0	22120000	14857000	21999000	20542000	0	0	19477000	0	14976000	13378000	0	0	0	12673000	6930500	13212000	14986000	0	13488000	28237000	0	0	0	16118000	14544000	17149000	18438000	0	17116000	0
XP_021415380.1;XP_021438951.1	XP_021415380.1;XP_021438951.1	XP_021415380.1 RING finger protein 44-like [Oncorhynchus mykiss];XP_021438951.1 RING finger protein 44-like [Oncorhynchus mykiss]	0	0	0	0	0	0	0	0	0	0	0	0	0	0	0	0	0	0	0	0	0	0	0	0	0	0	0	0	0	0	0	0	0	0	0	0	0	0	0	0	0	0	0	0	0	0	0
XP_021428377.1;XP_021415717.1	XP_021428377.1;XP_021415717.1	XP_021428377.1 proteasome subunit alpha type-2 [Oncorhynchus mykiss];XP_021415717.1 proteasome subunit alpha type-2-like [Oncorhynchus mykiss]	0	0	0	0	0	0	0	0	0	0	0	0	0	0	0	0	0	0	0	0	0	0	0	0	0	0	0	0	0	0	0	0	0	0	0	0	0	0	0	0	0	0	0	0	0	0	0
XP_021416011.1	XP_021416011.1	XP_021416011.1 type-4 ice-structuring protein-like [Oncorhynchus mykiss]	33810000	20884000	31998000	59227000	32766000	46414000	39907000	27784000	25539000	29100000	33458000	28311000	26761000	49723000	31531000	38568000	0	29779000	28764000	42402000	19555000	23187000	24472000	29073000	19586000	37235000	19784000	0	10337000	11886000	28779000	18813000	27389000	54828000	70320000	51687000	34430000	23376000	22748000	29200000	22472000	11233000	18685000	16783000	25255000	15868000	15662000
XP_021416129.1	XP_021416129.1	XP_021416129.1 antithrombin-III-like [Oncorhynchus mykiss]	173320000	226990000	187600000	218700000	218940000	273170000	248110000	131950000	276760000	168160000	146730000	150130000	118050000	149940000	188740000	107080000	152060000	161850000	313700000	295360000	696040000	557890000	571040000	567950000	425680000	553180000	567040000	472140000	351180000	596320000	725860000	678410000	656380000	618910000	372000000	499840000	611310000	360150000	351960000	497150000	409900000	238960000	409410000	315590000	355990000	476050000	509370000
XP_021416194.1	XP_021416194.1	XP_021416194.1 ectonucleotide pyrophosphatase/phosphodiesterase family member 2-like [Oncorhynchus mykiss]	145730000	130640000	128220000	125170000	105810000	114490000	100880000	121420000	117290000	117310000	163980000	141950000	121930000	149910000	137600000	119680000	172480000	134310000	125450000	119690000	134410000	117960000	110850000	103390000	97730000	110840000	107450000	92076000	91412000	99928000	131800000	116560000	111280000	111550000	131800000	138590000	134480000	140580000	119200000	98128000	97003000	112640000	124840000	110970000	105660000	129580000	126400000
XP_021417708.1;XP_021417707.1;XP_021416287.1;XP_021449982.1;XP_021447892.1	XP_021417708.1;XP_021417707.1;XP_021416287.1;XP_021449982.1;XP_021447892.1	XP_021417708.1 probable thiopurine S-methyltransferase isoform X2 [Oncorhynchus mykiss];XP_021417707.1 probable thiopurine S-methyltransferase isoform X1 [Oncorhynchus mykiss];XP_021416287.1 probable thiopurine S-methyltransferase [Oncorhynchus mykiss];XP_021449982.1 probable thiopurine S-methyltransferase, partial [Oncorhynchus mykiss];XP_021447892.1 probable thiopurine S-methyltransferase, part…	7698600	6860700	4980900	6295400	6312000	4663100	4819600	6602200	5450500	4674700	4076100	4985400	0	0	0	0	0	5182800	3198600	0	2820200	4465400	2435300	3087300	4489100	2693400	2567800	2500000	2447000	3311100	6731700	4309800	4456700	5070100	6923000	7648400	5555400	5354300	3053400	4341900	5198400	5529200	2907900	3748800	0	3614400	3365900
XP_021416460.1;XP_021416459.1;XP_021416458.1	XP_021416460.1;XP_021416459.1;XP_021416458.1	XP_021416460.1 lysozyme g-like isoform X3 [Oncorhynchus mykiss];XP_021416459.1 lysozyme g-like isoform X2 [Oncorhynchus mykiss];XP_021416458.1 lysozyme g-like isoform X1 [Oncorhynchus mykiss]	13302000	14459000	14537000	15659000	14923000	19672000	17399000	18759000	18311000	14231000	9580200	10357000	13178000	8965300	9600800	15655000	15530000	14347000	10787000	9585200	13470000	17629000	16860000	12083000	16340000	17309000	22321000	23015000	27019000	21509000	9940800	10355000	10850000	11739000	8708100	11248000	12391000	14897000	13575000	10341000	9853500	9037100	9436600	7693900	8512000	8667100	8634000
XP_021416862.1	XP_021416862.1	XP_021416862.1 saxitoxin and tetrodotoxin-binding protein 2-like, partial [Oncorhynchus mykiss]	26788000	39161000	53438000	105070000	201560000	210350000	250930000	234920000	161090000	187360000	67316000	84119000	136160000	162020000	209060000	189180000	275380000	209850000	173940000	161470000	129410000	213520000	176170000	295320000	473870000	568540000	582580000	777420000	879400000	1048700000	342620000	671860000	635440000	544560000	534840000	511470000	392010000	399840000	353470000	313080000	231120000	314300000	273410000	294520000	293630000	268150000	297170000
XP_021474974.1;XP_021429220.1;XP_021429219.1;XP_021439644.1;XP_021416918.1;XP_021416917.1	XP_021474974.1;XP_021429220.1;XP_021429219.1;XP_021439644.1;XP_021416918.1;XP_021416917.1	XP_021474974.1 GTP-binding nuclear protein Ran-like [Oncorhynchus mykiss];XP_021429220.1 GTP-binding nuclear protein Ran-like [Oncorhynchus mykiss];XP_021429219.1 GTP-binding nuclear protein Ran-like [Oncorhynchus mykiss];XP_021439644.1 GTP-binding nuclear protein Ran [Oncorhynchus mykiss];XP_021416918.1 GTP-binding nuclear protein Ran [Oncorhynchus mykiss];XP_021416917.1 GTP-binding nuclear prot…	0	0	0	0	0	0	0	0	0	0	0	0	0	0	0	0	0	0	0	0	0	0	0	0	0	0	0	0	0	0	0	0	0	0	0	0	0	0	0	0	2729800	0	0	0	0	0	0
XP_021417129.1	XP_021417129.1	XP_021417129.1 glutathione S-transferase P-like [Oncorhynchus mykiss]	0	0	0	0	0	0	0	0	0	0	0	0	0	0	0	0	0	0	0	0	0	0	0	0	0	0	3184300	3266500	2655100	2869300	0	0	0	3479300	2232400	0	0	0	3075200	4398100	0	0	0	0	0	0	0
XP_021417220.1	XP_021417220.1	XP_021417220.1 complement C3-like [Oncorhynchus mykiss]	34065000	65939000	68580000	80872000	141380000	122260000	126560000	118100000	83266000	78556000	24729000	59204000	71859000	86389000	110760000	88221000	120910000	58178000	39452000	39868000	16587000	38759000	28409000	44882000	52031000	57073000	59667000	80032000	85859000	94835000	27870000	85605000	56221000	52882000	52562000	52138000	36563000	25658000	24606000	35969000	40625000	173740000	145710000	136170000	131240000	110010000	107160000
XP_021417240.1	XP_021417240.1	XP_021417240.1 LOW QUALITY PROTEIN: complement C3-like [Oncorhynchus mykiss]	343080000	582080000	637890000	781560000	1453400000	1113100000	1152900000	837390000	546430000	564610000	251470000	554810000	729120000	751890000	911180000	750710000	786700000	455690000	319810000	354910000	260200000	620820000	391440000	897760000	1015200000	1084800000	895190000	1304200000	1106100000	1466200000	271120000	1297400000	622460000	613110000	583070000	520400000	333980000	265060000	251880000	585230000	150510000	591570000	468770000	451830000	405480000	339240000	358610000
XP_021417248.1	XP_021417248.1	XP_021417248.1 ribonuclease-like 3 [Oncorhynchus mykiss]	7020800	7007400	0	7192200	6845900	7432100	7392600	8185700	8066900	8416200	0	8012100	7546900	0	0	6707900	8438600	5150700	7019000	6731700	0	7867200	9438300	9915700	9318500	13956000	10799000	14842000	13269000	14582000	0	11797000	10369000	9071200	0	6466600	7368600	0	0	7244200	0	11285000	9936000	7819200	4789300	0	7115800
XP_021417252.1	XP_021417252.1	XP_021417252.1 complement C3 [Oncorhynchus mykiss]	27042000000	31400000000	30725000000	32056000000	36338000000	35817000000	38622000000	36331000000	31610000000	32253000000	22516000000	27106000000	29249000000	31510000000	34170000000	32599000000	46879000000	31657000000	28925000000	28488000000	25425000000	28628000000	28981000000	35477000000	40301000000	39330000000	37909000000	41897000000	42917000000	45013000000	21482000000	26283000000	24484000000	23164000000	23510000000	22930000000	21354000000	22793000000	23580000000	26646000000	28157000000	35456000000	32039000000	33617000000	32937000000	34835000000	35174000000
XP_021417482.1	XP_021417482.1	XP_021417482.1 transforming growth factor-beta-induced protein ig-h3-like [Oncorhynchus mykiss]	0	0	0	0	0	3698000	2930800	0	2662400	3338100	3318600	0	0	2807000	2524600	2806300	0	2825100	2584400	2766300	9355900	7897700	8493100	3527700	4049100	5064200	3755200	0	0	0	3622500	0	4177400	3250500	4733400	4853100	3873200	5587900	3162900	5109000	4310400	3536100	4914700	6178100	3495400	3067500	3447800
XP_021417654.1;XP_021427535.1;XP_021427534.1	XP_021417654.1	XP_021417654.1 adenylyl cyclase-associated protein 1-like [Oncorhynchus mykiss]	0	0	0	4931300	4570000	3735700	2521800	2324300	4328000	0	3510500	0	0	4448000	3082500	0	0	0	6245400	0	4205300	3775700	6007000	8863300	12110000	8315200	3800100	6672300	13038000	15620000	5062400	5658200	4429600	8453600	7044000	4302600	4102800	5756000	7049600	11495000	13354000	4178600	4029400	5715600	5653400	5529800	5607600
XP_021417729.1	XP_021417729.1	XP_021417729.1 triosephosphate isomerase B-like [Oncorhynchus mykiss]	0	0	0	0	0	0	0	0	0	0	0	0	0	0	0	0	0	0	0	0	0	0	0	0	0	0	0	0	0	0	0	0	0	0	0	0	0	0	0	0	0	0	0	0	0	0	0
XP_021418843.1;XP_021418842.1	XP_021418843.1;XP_021418842.1	XP_021418843.1 interleukin-1 receptor accessory protein-like isoform X2 [Oncorhynchus mykiss];XP_021418842.1 interleukin-1 receptor accessory protein-like isoform X1 [Oncorhynchus mykiss]	0	0	0	0	0	0	0	0	0	0	0	0	0	0	0	0	0	0	0	0	0	0	0	0	0	0	0	0	0	0	0	0	0	0	0	0	0	0	0	0	0	1676400	0	0	0	0	0
XP_021418848.1	XP_021418848.1	XP_021418848.1 coagulation factor IX-like [Oncorhynchus mykiss]	10432000	0	0	0	0	5947400	0	9076600	15617000	8214700	28344000	0	13106000	8738000	0	9190100	0	10904000	22408000	13482000	13367000	10019000	10365000	11023000	10142000	8996300	8524400	12613000	6176000	7378700	8633100	9120500	11237000	9143100	8586100	9569400	10032000	10030000	9866100	0	7411100	0	0	0	0	8884400	10468000
XP_021419133.1	XP_021419133.1	XP_021419133.1 leukotriene A-4 hydrolase-like [Oncorhynchus mykiss]	0	0	0	11045000	13313000	13267000	12381000	10670000	16395000	12396000	0	0	0	0	0	0	0	0	0	5943400	2056400	0	2037300	4171500	4523000	7803700	6557600	9880100	10226000	22039000	5046900	7624100	7218000	9785200	7162800	7490400	9407900	9627100	11567000	10594000	4555500	6013200	8832800	9712000	7619400	11122000	12523000
XP_021419363.1;XP_021432990.1;XP_021419382.1;XP_021432989.1;XP_021432988.1;XP_021419381.1;XP_021419364.1	XP_021419363.1;XP_021432990.1;XP_021419382.1;XP_021432989.1;XP_021432988.1;XP_021419381.1;XP_021419364.1	XP_021419363.1 6-phosphofructo-2-kinase/fructose-2,6-bisphosphatase 3-like isoform X1 [Oncorhynchus mykiss];XP_021432990.1 6-phosphofructo-2-kinase/fructose-2,6-bisphosphatase 3-like isoform X3 [Oncorhynchus mykiss];XP_021419382.1 6-phosphofructo-2-kinase/fructose-2,6-bisphosphatase 3-like isoform X2 [Oncorhynchus mykiss];XP_021432989.1 6-phosphofructo-2-kinase/fructose-2,6-bisphosphatase 3-like …	0	0	0	0	0	0	0	0	0	0	0	0	0	0	0	0	0	0	0	0	0	0	0	0	0	0	0	0	0	0	0	0	0	0	0	0	0	0	0	0	0	0	0	0	0	0	0
XP_021432945.1;XP_021419415.1	XP_021432945.1;XP_021419415.1	XP_021432945.1 rab GDP dissociation inhibitor beta-like [Oncorhynchus mykiss];XP_021419415.1 rab GDP dissociation inhibitor beta-like [Oncorhynchus mykiss]	0	0	0	0	0	0	0	0	0	0	0	0	0	0	0	0	0	0	0	0	0	0	0	0	0	0	0	0	0	0	0	0	0	0	0	0	0	0	0	0	1086400	0	0	0	0	0	0
XP_021432927.1;XP_021432925.1;XP_021419438.1	XP_021432927.1;XP_021432925.1;XP_021419438.1	XP_021432927.1 mitogen-activated protein kinase 12-like isoform X2 [Oncorhynchus mykiss];XP_021432925.1 mitogen-activated protein kinase 12-like isoform X1 [Oncorhynchus mykiss];XP_021419438.1 mitogen-activated protein kinase 12-like [Oncorhynchus mykiss]	25147000	48613000	44883000	39839000	45773000	39679000	45059000	41336000	30996000	31096000	15761000	53863000	53213000	58798000	38670000	56937000	77867000	20813000	18353000	26433000	0	21672000	16660000	29420000	23790000	49466000	32610000	70667000	55755000	93506000	17962000	38673000	23251000	21459000	9737600	17317000	25070000	12515000	0	32060000	0	32600000	24640000	17665000	0	0	0
XP_021419683.1;XP_021419682.1	XP_021419683.1;XP_021419682.1	XP_021419683.1 lumican-like [Oncorhynchus mykiss];XP_021419682.1 lumican-like [Oncorhynchus mykiss]	91349000	73731000	69827000	77349000	75960000	74284000	63624000	67487000	62322000	53329000	43279000	53567000	43128000	42187000	45846000	45286000	0	50320000	48702000	49804000	59119000	55634000	53324000	48568000	45063000	53854000	47372000	39372000	36804000	34386000	79532000	66624000	87310000	64529000	69190000	77369000	87699000	76052000	59278000	46097000	68375000	66570000	70918000	62977000	57620000	71786000	67929000
XP_021419721.1	XP_021419721.1	XP_021419721.1 L-lactate dehydrogenase A chain [Oncorhynchus mykiss]	0	8092100	6063200	0	0	0	0	0	0	0	103380000	10076000	0	0	0	0	0	0	0	0	17741000	7930400	0	0	2560400	0	41110000	0	0	2820800	0	0	0	38496000	4570400	0	0	0	0	0	43192000	8338800	4411600	3095000	0	0	0
XP_021419815.1	XP_021419815.1	XP_021419815.1 LOW QUALITY PROTEIN: fish-egg lectin-like [Oncorhynchus mykiss]	0	0	0	0	0	0	0	0	0	0	0	0	0	0	0	0	0	0	0	0	0	0	0	0	0	0	0	0	0	0	0	0	0	0	0	0	0	0	0	2423600	0	0	0	0	0	0	0
XP_021419817.1	XP_021419817.1	XP_021419817.1 fish-egg lectin-like [Oncorhynchus mykiss]	8574200	10446000	13550000	20045000	10100000	12260000	11174000	12705000	10025000	13849000	0	6911400	6180000	7142300	7378000	6881100	13016000	6889200	5532600	7355500	24847000	0	19928000	23646000	13865000	40302000	41322000	33666000	29333000	39189000	55782000	47563000	66118000	54170000	44765000	52272000	93227000	62954000	45464000	41991000	0	0	0	0	15557000	0	17793000
XP_021419888.1	XP_021419888.1	XP_021419888.1 inter-alpha-trypsin inhibitor heavy chain H2 [Oncorhynchus mykiss]	77083000	69806000	68150000	83275000	83107000	82587000	74908000	70404000	57817000	68915000	68524000	68649000	59872000	72699000	82933000	87110000	34176000	73124000	64403000	66390000	93540000	95753000	87984000	90020000	81424000	88158000	97537000	92583000	82734000	80666000	87100000	64237000	86880000	91182000	134220000	117170000	77890000	93961000	79617000	68271000	45296000	53168000	64861000	56906000	65347000	65813000	54885000
XP_021420054.1;NP_001117813.1	XP_021420054.1;NP_001117813.1	XP_021420054.1 retinol-binding protein 2 isoform X1 [Oncorhynchus mykiss];NP_001117813.1 retinol-binding protein 2 precursor [Oncorhynchus mykiss]	151480000	177070000	158430000	114570000	97508000	139730000	122170000	131640000	118620000	117330000	130750000	124500000	142510000	90024000	135710000	97468000	173880000	124700000	140620000	126690000	141750000	216770000	208980000	132690000	132510000	102250000	144310000	171620000	151380000	132410000	182000000	186050000	211640000	188510000	208330000	242000000	152110000	181760000	170540000	149540000	181830000	141880000	116840000	102950000	93911000	107480000	109840000
XP_021420187.1;XP_021472646.1;XP_021424573.1;XP_021427639.1;XP_021427637.1;XP_021416283.1;XP_021416282.1;XP_021427636.1;XP_021427635.1;XP_021479166.1	XP_021420187.1;XP_021472646.1;XP_021424573.1	XP_021420187.1 alpha-enolase-like [Oncorhynchus mykiss];XP_021472646.1 enolase [Oncorhynchus mykiss];XP_021424573.1 enolase-like [Oncorhynchus mykiss]	4791200	0	5891000	4907800	0	0	0	0	0	0	0	3373600	0	0	0	0	8969700	0	0	0	5032500	3678400	3555700	7897500	4614000	7817500	5989200	7029100	7596700	8873400	4767900	9149600	7668400	9662400	6897500	5919900	11731000	9811200	7081800	10533000	5620800	2814200	3680200	4914900	4222000	5965700	5127600
XP_021420238.1	XP_021420238.1	XP_021420238.1 nidogen-1 [Oncorhynchus mykiss]	0	0	0	0	0	0	0	0	0	0	0	0	0	0	0	0	0	0	0	0	5438400	6109700	0	3233300	0	0	0	0	0	0	0	0	0	0	0	4286900	0	0	0	0	0	0	2826000	0	3336100	0	0
XP_021420241.1	XP_021420241.1	XP_021420241.1 microfibril-associated glycoprotein 4-like [Oncorhynchus mykiss]	6349600	10788000	8230600	9343000	21523000	12016000	16098000	12662000	10635000	11191000	0	0	26189000	0	67753000	46077000	106090000	49470000	34944000	32639000	0	21620000	15131000	38647000	37855000	71040000	39497000	103910000	118720000	157070000	30900000	142510000	102720000	70432000	37374000	53917000	85553000	40491000	44112000	51271000	29342000	108800000	88173000	80291000	48150000	67178000	65988000
XP_021420439.1;XP_021420444.1;XP_021420443.1;XP_021420442.1;XP_021420441.1;XP_021431421.1	XP_021420439.1;XP_021420444.1;XP_021420443.1;XP_021420442.1	XP_021420439.1 multiple inositol polyphosphate phosphatase 1-like isoform X1 [Oncorhynchus mykiss];XP_021420444.1 multiple inositol polyphosphate phosphatase 1-like isoform X4 [Oncorhynchus mykiss];XP_021420443.1 multiple inositol polyphosphate phosphatase 1-like isoform X4 [Oncorhynchus mykiss];XP_021420442.1 multiple inositol polyphosphate phosphatase 1-like isoform X3 [Oncorhynchus mykiss]	2116700	1391700	0	0	0	0	0	0	0	0	0	0	0	0	0	0	0	0	0	0	0	2437600	2030700	1770600	0	1690600	1169100	1529700	1798700	1109900	2783700	2176800	2056800	1928700	2473900	0	1860400	2946800	2102300	2125400	2243500	1436800	1900000	1477700	2168100	1956200	1285200
XP_021420857.1	XP_021420857.1	XP_021420857.1 uncharacterized protein LOC110491612 [Oncorhynchus mykiss]	31042000	32055000	28808000	20699000	19438000	24225000	14251000	12927000	14768000	20636000	25326000	25244000	25359000	18132000	19195000	14641000	6444800	29255000	20513000	25095000	32711000	31482000	27343000	22170000	23250000	14817000	16295000	15285000	14379000	13193000	28530000	24325000	20486000	22408000	26365000	29839000	23935000	27217000	30286000	19113000	34491000	26792000	23487000	20950000	22702000	21684000	23478000
XP_021421009.1	XP_021421009.1	XP_021421009.1 C-reactive protein-like [Oncorhynchus mykiss]	1483300000	1200200000	1219400000	1126000000	1116500000	1099200000	1023600000	1108300000	1053200000	1144200000	1779700000	1540100000	1371900000	1343100000	1253400000	1227600000	1060000000	1336600000	1290100000	1215400000	1078200000	976400000	909390000	750470000	692720000	742260000	708550000	639360000	649320000	548070000	949570000	872060000	821290000	767620000	905520000	927160000	887740000	1053500000	923710000	691120000	862050000	979500000	908250000	896690000	885520000	975330000	854690000
XP_021421228.1;XP_021481742.1;XP_021455525.1	XP_021421228.1	XP_021421228.1 fructose-bisphosphate aldolase A [Oncorhynchus mykiss]	95112000	109700000	130080000	106880000	33939000	42562000	77816000	30397000	16057000	56162000	230670000	201070000	24443000	48243000	41605000	27554000	0	4947700	6987800	94694000	111660000	76093000	15621000	20299000	39038000	35924000	246740000	21208000	10997000	55356000	10712000	26938000	0	139320000	13178000	0	19295000	0	4913500	44909000	202140000	45739000	31977000	58057000	51270000	20962000	162930000
XP_021421270.1;XP_021421269.1;XP_021421268.1	XP_021421270.1;XP_021421269.1;XP_021421268.1	XP_021421270.1 carboxypeptidase N catalytic chain isoform X3 [Oncorhynchus mykiss];XP_021421269.1 carboxypeptidase N catalytic chain isoform X2 [Oncorhynchus mykiss];XP_021421268.1 carboxypeptidase N catalytic chain isoform X1 [Oncorhynchus mykiss]	22273000	21144000	21683000	16739000	20783000	19584000	16872000	21782000	20986000	21447000	25047000	29253000	20482000	24106000	25757000	26759000	25337000	23877000	24421000	26961000	16270000	20481000	17921000	15709000	17714000	19128000	16668000	17740000	21556000	19483000	21718000	19252000	18380000	17250000	21907000	22503000	20420000	24637000	20105000	14941000	20842000	17621000	17424000	16795000	16664000	17957000	16003000
XP_021421369.1	XP_021421369.1	XP_021421369.1 intelectin-like [Oncorhynchus mykiss]	197880000	180030000	171150000	167190000	166480000	148150000	150350000	143920000	129530000	126530000	52912000	39443000	43342000	37554000	42293000	37440000	52843000	35894000	34518000	32115000	65434000	78368000	65978000	65768000	61690000	42948000	52881000	62343000	62829000	60432000	34514000	42394000	51424000	46466000	61392000	53464000	32705000	44414000	39576000	38992000	26600000	37067000	27808000	27591000	35907000	27226000	23460000
XP_021421393.1;XP_021421391.1;XP_021421388.1;XP_021421387.1;XP_021421386.1	XP_021421393.1;XP_021421391.1;XP_021421388.1;XP_021421387.1;XP_021421386.1	XP_021421393.1 beta-2-microglobulin-like [Oncorhynchus mykiss];XP_021421391.1 beta-2-microglobulin-like [Oncorhynchus mykiss];XP_021421388.1 beta-2-microglobulin-like isoform X2 [Oncorhynchus mykiss];XP_021421387.1 beta-2-microglobulin-like isoform X2 [Oncorhynchus mykiss];XP_021421386.1 beta-2-microglobulin-like isoform X1 [Oncorhynchus mykiss]	195360000	195380000	167430000	165020000	156240000	148680000	191480000	215660000	187240000	98854000	138890000	134140000	125250000	89391000	128260000	166180000	41698000	136270000	172800000	101040000	88624000	129190000	134760000	86593000	76394000	125340000	129390000	108110000	117340000	86983000	139810000	147670000	162900000	155750000	157280000	209010000	195960000	242870000	213880000	150380000	156700000	163730000	150720000	124760000	147850000	133500000	117340000
XP_021421394.1;XP_021421392.1;XP_021421389.1	XP_021421394.1;XP_021421392.1;XP_021421389.1	XP_021421394.1 beta-2-microglobulin-like [Oncorhynchus mykiss];XP_021421392.1 beta-2-microglobulin-like [Oncorhynchus mykiss];XP_021421389.1 beta-2-microglobulin-like [Oncorhynchus mykiss]	0	0	0	0	0	0	0	0	0	0	0	0	0	0	0	0	0	0	0	0	0	0	0	0	0	0	0	7315600	0	0	0	0	0	0	0	0	0	0	0	0	0	0	0	0	0	0	0
XP_021421659.1;XP_021465775.1;XP_021424715.1;XP_021424714.1;XP_021472390.1;XP_021421657.1;XP_021472389.1;XP_021465776.1	XP_021421659.1;XP_021465775.1;XP_021424715.1;XP_021424714.1;XP_021472390.1;XP_021421657.1;XP_021472389.1;XP_021465776.1	XP_021421659.1 tubulin alpha-1B chain-like [Oncorhynchus mykiss];XP_021465775.1 tubulin alpha-1C chain-like [Oncorhynchus mykiss];XP_021424715.1 tubulin alpha-1C chain [Oncorhynchus mykiss];XP_021424714.1 tubulin alpha chain-like [Oncorhynchus mykiss];XP_021472390.1 tubulin alpha chain [Oncorhynchus mykiss];XP_021421657.1 tubulin alpha chain-like [Oncorhynchus mykiss];XP_021472389.1 tubulin alpha…	0	0	0	0	0	0	0	0	0	0	0	0	0	0	0	0	0	0	0	0	0	0	0	0	0	0	0	0	0	0	0	0	0	0	0	0	0	0	0	0	0	0	0	0	0	0	0
XP_021422118.1	XP_021422118.1	XP_021422118.1 properdin [Oncorhynchus mykiss]	132880000	162390000	170390000	191330000	200070000	204500000	207100000	225630000	189570000	198200000	147040000	167410000	188680000	213730000	249650000	223980000	266730000	226010000	213440000	185210000	108330000	144270000	125900000	145090000	175310000	169460000	191520000	227660000	263730000	236690000	138880000	157730000	139280000	141810000	165270000	157350000	140260000	138430000	162580000	136000000	169230000	228310000	225640000	230650000	239760000	254500000	220870000
XP_021422217.1;XP_021422216.1	XP_021422217.1;XP_021422216.1	XP_021422217.1 hyaluronidase-3-like [Oncorhynchus mykiss];XP_021422216.1 hyaluronidase-3-like [Oncorhynchus mykiss]	3186700	2801200	2587600	2710800	0	0	897280	0	1293500	1429700	4329700	3174700	3058800	0	0	0	2474300	1862700	1681000	0	3788900	2696300	1805000	0	0	0	0	0	0	0	4220700	3301000	1829800	1689400	0	1632100	1752900	0	0	0	4863800	3571500	0	3735600	1176400	1328800	1494900
XP_021422593.1	XP_021422593.1	XP_021422593.1 1-phosphatidylinositol 4,5-bisphosphate phosphodiesterase gamma-1 [Oncorhynchus mykiss]	0	0	0	0	0	0	0	0	0	0	0	0	0	0	0	0	0	0	0	0	0	0	0	0	0	0	19056000	23657000	0	19434000	28663000	27004000	30501000	35673000	38302000	30485000	22295000	27728000	0	0	29200000	0	0	28707000	29536000	24501000	24437000
XP_021422626.1	XP_021422626.1	XP_021422626.1 complement C1q tumor necrosis factor-related protein 3 [Oncorhynchus mykiss]	161750000	526330000	464510000	378390000	333640000	357050000	300870000	276970000	161440000	201280000	72383000	172120000	202410000	192200000	125880000	104960000	50551000	56504000	57800000	57523000	70608000	209980000	161340000	206430000	177980000	158990000	138220000	238390000	282530000	242790000	273480000	498840000	519940000	311490000	239090000	188330000	109500000	122520000	109470000	220990000	50342000	400200000	419720000	264850000	184840000	115120000	58772000
XP_021422703.1	XP_021422703.1	XP_021422703.1 glutathione S-transferase Mu 3-like [Oncorhynchus mykiss]	0	0	0	0	0	0	0	0	0	0	0	0	0	0	0	0	0	0	0	0	11596000	9213500	9580300	8764000	7723600	0	0	0	12989000	0	8948300	0	15848000	11090000	0	0	16929000	0	0	21961000	128610000	27673000	0	0	16119000	0	9149900
XP_021422752.1;XP_021455224.1;XP_021455221.1;XP_021455226.1;XP_021455220.1;XP_021455225.1;XP_021455219.1;XP_021455223.1;XP_021455222.1;XP_021455218.1;XP_021455216.1;XP_021455215.1;XP_021455214.1;XP_021455213.1;XP_021455212.1;XP_021455211.1;XP_021455210.1	XP_021422752.1	XP_021422752.1 receptor-type tyrosine-protein phosphatase F-like [Oncorhynchus mykiss]	16657000	14045000	14796000	15761000	15626000	12919000	11721000	12773000	10732000	13829000	11053000	12518000	10691000	0	8488400	0	11968000	10397000	8969800	0	9816500	9352800	9455800	8801800	8144100	10357000	10711000	7777600	6486400	6732300	10397000	11103000	12698000	11590000	13109000	13806000	8539300	13556000	8586400	7899600	8532500	9957100	10113000	10022000	8008000	10004000	7403900
XP_021422786.1;XP_021422785.1;XP_021422784.1	XP_021422786.1;XP_021422785.1;XP_021422784.1	XP_021422786.1 uncharacterized protein LOC110492668 [Oncorhynchus mykiss];XP_021422785.1 uncharacterized protein LOC110492668 [Oncorhynchus mykiss];XP_021422784.1 uncharacterized protein LOC110492668 [Oncorhynchus mykiss]	9231000	9971300	8594700	9397300	7940200	7888500	6716500	5603300	7367500	8905400	9127900	9016200	8137700	7509400	7176600	3772700	8499800	8946600	8630800	7204800	7625000	7083800	6869400	5722900	6585000	4341900	4550600	6060300	6849000	5964300	7295400	7864600	7552200	8220900	7223900	10812000	6704100	9455800	8104000	5834500	8056500	8191100	5650000	5322800	6014900	6938200	6359900
XP_021426042.1;XP_021423270.1;XP_021423269.1;XP_021423268.1;XP_021450014.1;XP_021450013.1;XP_021447922.1	XP_021426042.1;XP_021423270.1;XP_021423269.1;XP_021423268.1;XP_021450014.1;XP_021450013.1;XP_021447922.1	XP_021426042.1 vascular cell adhesion protein 1-like [Oncorhynchus mykiss];XP_021423270.1 vascular cell adhesion protein 1-like isoform X2 [Oncorhynchus mykiss];XP_021423269.1 vascular cell adhesion protein 1-like isoform X1 [Oncorhynchus mykiss];XP_021423268.1 vascular cell adhesion protein 1-like isoform X1 [Oncorhynchus mykiss];XP_021450014.1 vascular cell adhesion protein 1-like isoform X2 [O…	0	0	0	0	0	0	0	0	0	0	0	0	0	0	0	0	0	0	0	0	0	0	0	0	0	0	0	0	0	0	0	0	0	0	0	0	0	0	0	0	0	0	0	0	0	0	0
XP_021423341.1	XP_021423341.1	XP_021423341.1 fibulin-1-like [Oncorhynchus mykiss]	42205000	42877000	36166000	30237000	32973000	34135000	32364000	31535000	33255000	30367000	40481000	27531000	24580000	23913000	24333000	21444000	40745000	33667000	29123000	27753000	29667000	27978000	24223000	23185000	19437000	18827000	22489000	16009000	18110000	15826000	29313000	28699000	22760000	25316000	24791000	29346000	26845000	35805000	20633000	18795000	28166000	29454000	31761000	26166000	30744000	30458000	25447000
XP_021466337.1;XP_021436148.1;XP_021436147.1;XP_021423530.1;XP_021423529.1;XP_021423528.1;XP_021418585.1	XP_021466337.1;XP_021436148.1;XP_021436147.1;XP_021423530.1;XP_021423529.1;XP_021423528.1;XP_021418585.1	XP_021466337.1 elongation factor 1-alpha, somatic form [Oncorhynchus mykiss];XP_021436148.1 elongation factor 1-alpha, somatic form-like [Oncorhynchus mykiss];XP_021436147.1 elongation factor 1-alpha, somatic form-like [Oncorhynchus mykiss];XP_021423530.1 elongation factor 1-alpha, somatic form-like isoform X3 [Oncorhynchus mykiss];XP_021423529.1 elongation factor 1-alpha 1-like isoform X2 [Oncor…	0	0	0	0	0	0	0	0	0	0	0	0	0	0	0	0	0	0	0	0	0	0	0	0	0	0	0	0	0	0	0	0	0	0	0	0	0	0	0	0	0	0	0	0	0	0	0
XP_021423737.1	XP_021423737.1	XP_021423737.1 immunoglobulin kappa light chain-like [Oncorhynchus mykiss]	0	0	0	0	0	8254200	7800000	11369000	17600000	24789000	0	0	0	0	0	0	0	19330000	46326000	45264000	0	0	0	0	0	5610900	18400000	53384000	84463000	63123000	12949000	13443000	12618000	9377500	11015000	14575000	13376000	20519000	21149000	15989000	32143000	21505000	23161000	17898000	21395000	24553000	22019000
XP_021423766.1;XP_021480682.1	XP_021423766.1	XP_021423766.1 N-acetylmuramoyl-L-alanine amidase-like [Oncorhynchus mykiss]	60867000	55892000	63159000	61928000	71807000	62806000	62727000	68618000	66017000	62889000	50648000	57392000	59690000	66491000	70953000	62676000	99878000	59124000	67076000	59499000	95434000	106040000	98271000	89787000	107470000	104390000	101720000	120010000	124770000	118860000	107460000	137820000	131350000	111080000	112850000	109860000	118240000	122330000	116710000	100630000	81516000	121110000	115480000	100930000	92070000	97855000	94552000
XP_021423791.1	XP_021423791.1	XP_021423791.1 beta-2-glycoprotein 1-like [Oncorhynchus mykiss]	238750000	239190000	220800000	220250000	226770000	231240000	234450000	217750000	181510000	219950000	350350000	361480000	330800000	345630000	379560000	373620000	419490000	338270000	308220000	304730000	294840000	275700000	283410000	258310000	292550000	271390000	299250000	287670000	309090000	287710000	248700000	220110000	185460000	190900000	256400000	218630000	212980000	181050000	252600000	237110000	185920000	236890000	223530000	242170000	255030000	320360000	332040000
XP_021423793.1;XP_021423792.1	XP_021423793.1;XP_021423792.1	XP_021423793.1 beta-2-glycoprotein 1-like isoform X2 [Oncorhynchus mykiss];XP_021423792.1 beta-2-glycoprotein 1-like isoform X1 [Oncorhynchus mykiss]	9353000	9550300	7243100	8186800	7216600	8297000	10102000	7723900	6878700	7730100	14508000	11416000	10626000	13828000	11482000	11277000	17490000	10417000	9021400	10669000	9531700	9548600	8011000	6876900	8731100	6525400	6274800	8112200	7894500	10512000	9840800	7573600	7338700	6890500	7905000	5175500	6903200	7730700	8118600	5713100	8446700	9863500	8527500	11251000	13932000	11844000	13150000
XP_021423823.1;XP_021423822.1;XP_021412977.1;XP_021412976.1	XP_021423823.1;XP_021423822.1;XP_021412977.1;XP_021412976.1	XP_021423823.1 malate dehydrogenase, cytoplasmic isoform X2 [Oncorhynchus mykiss];XP_021423822.1 malate dehydrogenase, cytoplasmic isoform X1 [Oncorhynchus mykiss];XP_021412977.1 malate dehydrogenase, cytoplasmic-like isoform X2 [Oncorhynchus mykiss];XP_021412976.1 malate dehydrogenase, cytoplasmic-like isoform X1 [Oncorhynchus mykiss]	0	0	0	0	0	0	0	0	0	0	0	0	0	0	0	0	0	0	0	0	5802500	6001600	6133700	7257700	7766600	5108100	4727700	6299600	5770800	6074500	4709100	6664000	4218300	5586900	5105800	6223200	3770700	7518100	6694500	6103800	5983900	3661600	2705300	3739300	5774700	3823500	4437600
XP_021423876.1	XP_021423876.1	XP_021423876.1 complement C3-like [Oncorhynchus mykiss]	2391700000	3197300000	3213600000	3678400000	4455400000	4139700000	4072300000	3843500000	3013400000	2938900000	1882500000	2566600000	3033600000	3430300000	3789300000	3746700000	4918100000	3166500000	2849000000	2469100000	2178800000	2624500000	2438800000	2725400000	3569200000	3610700000	3663900000	4478800000	4924200000	5182600000	976510000	1408400000	1426000000	1273400000	1351900000	1223600000	1142200000	954090000	774330000	923640000	2147000000	3277300000	3717300000	3742200000	3351300000	3460300000	3175700000
XP_021423950.1;XP_021423951.1	XP_021423950.1;XP_021423951.1	XP_021423950.1 uncharacterized protein LOC110493791 isoform X1 [Oncorhynchus mykiss];XP_021423951.1 uncharacterized protein LOC110493791 isoform X2 [Oncorhynchus mykiss]	24116000	39364000	31775000	26458000	30207000	37681000	37689000	31265000	28924000	35817000	20896000	50670000	61746000	64797000	75277000	60544000	47620000	28476000	25424000	42162000	9829900	36786000	24502000	35644000	31496000	45389000	35137000	81154000	83221000	82100000	13989000	68632000	32134000	30732000	26406000	24561000	13829000	17758000	30136000	50057000	11577000	98388000	49249000	33503000	37515000	13118000	9992200
XP_021450474.1;XP_021424008.1;XP_021424009.1	XP_021450474.1;XP_021424008.1;XP_021424009.1	XP_021450474.1 histone H1, partial [Oncorhynchus mykiss];XP_021424008.1 histone H1-like isoform X1 [Oncorhynchus mykiss];XP_021424009.1 histone H1-like isoform X2 [Oncorhynchus mykiss]	0	0	0	0	0	0	0	0	0	0	0	0	0	0	0	0	0	0	0	0	0	0	2197700	0	0	0	4410300	3611000	5394100	1865400	0	2490800	3495100	0	0	0	5870400	2940900	0	3081200	234010000	0	3904200	3126100	0	10992000	5611600
XP_021426113.1;XP_021424196.1;XP_021448898.1;XP_021449370.1;XP_021424010.1;XP_021442031.1;XP_021447886.1	XP_021426113.1;XP_021424196.1;XP_021448898.1;XP_021449370.1;XP_021424010.1;XP_021442031.1;XP_021447886.1	XP_021426113.1 histone H3-like [Oncorhynchus mykiss];XP_021424196.1 histone H3 [Oncorhynchus mykiss];XP_021448898.1 histone H3-like, partial [Oncorhynchus mykiss];XP_021449370.1 histone H3-like [Oncorhynchus mykiss];XP_021424010.1 histone H3-like [Oncorhynchus mykiss];XP_021442031.1 histone H3.3-like [Oncorhynchus mykiss];XP_021447886.1 histone H3-like [Oncorhynchus mykiss]	34980000	8051600	8526000	5472200	10742000	7052900	5447900	6166700	2818200	0	4444200	3293700	6925200	0	0	15570000	0	3495600	2281300	1281400	8947900	3581600	6687400	4744300	0	4018300	10358000	3649200	6501900	0	19045000	21008000	67344000	44887000	13519000	0	51639000	17134000	0	3711300	99811000	5107000	4855200	8148100	2186700	20257000	13176000
XP_021447776.1;XP_021424020.1;XP_021449245.1;XP_021447686.1;XP_021423149.1	XP_021447776.1;XP_021424020.1;XP_021449245.1	XP_021447776.1 histone H4 [Oncorhynchus mykiss];XP_021424020.1 histone H4 [Oncorhynchus mykiss];XP_021449245.1 histone H4-like [Oncorhynchus mykiss]	153370000	31489000	36794000	40131000	181140000	119740000	80169000	136270000	43559000	41859000	153990000	50984000	175950000	79983000	14110000	428340000	36167000	78297000	51048000	15748000	100230000	53533000	52414000	38319000	17475000	36457000	76412000	41419000	87023000	28041000	44344000	24378000	67420000	50251000	36469000	41687000	122950000	83775000	19617000	51690000	1174100000	47143000	33396000	54525000	32673000	144870000	99163000
XP_021424234.1	XP_021424234.1	XP_021424234.1 phosphatidylcholine-sterol acyltransferase-like [Oncorhynchus mykiss]	83256000	77406000	65921000	55645000	59937000	57954000	56605000	66077000	66568000	59097000	100250000	84087000	74386000	74267000	66449000	59210000	81106000	69930000	75643000	63569000	61923000	58625000	52698000	50131000	41242000	65075000	54659000	49948000	48846000	52961000	53357000	52616000	57346000	44676000	48345000	49950000	56553000	57685000	48250000	36762000	46138000	54876000	57491000	47095000	48221000	51317000	49226000
XP_021424380.1;XP_021424381.1	XP_021424380.1;XP_021424381.1	XP_021424380.1 inter-alpha-trypsin inhibitor heavy chain H3-like isoform X1 [Oncorhynchus mykiss];XP_021424381.1 inter-alpha-trypsin inhibitor heavy chain H3-like isoform X2 [Oncorhynchus mykiss]	2362100000	2191000000	2159700000	2068300000	1755500000	1840200000	1914800000	1948100000	2031100000	2056600000	2684600000	2796700000	2570300000	2654600000	2450000000	2309900000	2989000000	2460700000	2538400000	2441500000	2657800000	2441600000	2296100000	2156300000	1889900000	2130100000	2172900000	2155400000	2118000000	2139000000	2470300000	2335500000	2303900000	2279600000	2406400000	2417600000	2738000000	2598300000	2303600000	2027800000	2110100000	2061500000	2447300000	2272400000	1969700000	2344700000	2317600000
XP_021424382.1	XP_021424382.1	XP_021424382.1 inter-alpha-trypsin inhibitor heavy chain H3-like isoform X3 [Oncorhynchus mykiss]	0	0	0	0	0	0	0	0	0	0	0	0	0	0	0	0	0	0	0	0	0	0	0	0	0	0	0	0	0	0	0	0	0	0	0	0	0	0	0	0	0	0	0	0	0	0	0
XP_021424446.1	XP_021424446.1	XP_021424446.1 olfactomedin-4-like [Oncorhynchus mykiss]	85184000	121520000	113570000	126220000	150890000	107930000	141650000	157080000	172040000	136720000	76241000	100360000	129160000	93347000	90817000	125050000	89099000	151090000	190180000	138240000	53881000	77791000	141550000	180240000	279460000	117540000	85157000	78726000	108900000	92370000	64905000	84639000	101220000	115030000	88381000	90729000	74209000	138590000	165160000	321770000	70462000	77438000	54003000	67680000	174660000	76178000	91071000
XP_021424881.1	XP_021424881.1	XP_021424881.1 uncharacterized protein LOC110494266 [Oncorhynchus mykiss]	23230000	21823000	21521000	19484000	17083000	18981000	14437000	12728000	14437000	13860000	15594000	20524000	16839000	12590000	0	0	0	14661000	13973000	12950000	15110000	21107000	18639000	17386000	15074000	11130000	14404000	11085000	11695000	10549000	16653000	15237000	15199000	17578000	17777000	17066000	13780000	16013000	16856000	13411000	18377000	19088000	15132000	13196000	12625000	13650000	10538000
XP_021424972.1	XP_021424972.1	XP_021424972.1 ATP-dependent 6-phosphofructokinase, muscle type-like [Oncorhynchus mykiss]	0	0	0	0	0	0	0	0	0	0	0	0	0	0	0	0	0	0	0	0	0	0	0	0	0	0	0	0	0	0	0	0	0	5423100	0	0	0	0	0	0	0	0	0	0	0	0	0
XP_021451897.1;XP_021425068.1	XP_021451897.1;XP_021425068.1	XP_021451897.1 coactosin-like protein [Oncorhynchus mykiss];XP_021425068.1 coactosin-like protein [Oncorhynchus mykiss]	0	0	0	0	0	0	0	0	0	0	0	0	0	0	0	0	0	0	0	0	0	0	0	0	0	0	0	0	0	0	0	0	0	0	0	0	0	0	0	0	6179000	0	0	0	0	0	0
XP_021425166.1;XP_021425157.1	XP_021425166.1;XP_021425157.1	XP_021425166.1 carboxylesterase 5A-like isoform X2 [Oncorhynchus mykiss];XP_021425157.1 carboxylesterase 5A-like isoform X1 [Oncorhynchus mykiss]	837620000	688570000	704010000	658500000	577080000	562910000	600730000	626260000	640040000	633000000	870260000	953630000	840540000	869520000	696690000	684420000	522130000	656340000	652800000	686110000	822890000	708300000	686520000	649090000	592890000	680750000	568020000	525060000	509870000	564080000	634480000	645890000	596860000	593690000	615150000	660140000	708260000	697640000	654720000	604300000	519730000	606240000	671990000	661350000	557570000	667060000	648590000
XP_021425320.1	XP_021425320.1	XP_021425320.1 inter-alpha-trypsin inhibitor heavy chain H3-like [Oncorhynchus mykiss]	916180000	937900000	926230000	1084900000	1052600000	1070800000	1080900000	986080000	800640000	920150000	804440000	828390000	784940000	998760000	1064800000	1060700000	958940000	847960000	693980000	910230000	1153200000	1019700000	1009400000	1251200000	1250800000	1366600000	1221900000	1182000000	1152500000	1187000000	807100000	835620000	869920000	921990000	1204200000	1035500000	900780000	771210000	761780000	875620000	614040000	825460000	1028100000	1024400000	893740000	1018400000	838230000
XP_021425592.1	XP_021425592.1	XP_021425592.1 hepatocyte growth factor-like protein [Oncorhynchus mykiss]	16208000	14009000	14985000	12865000	17504000	22618000	19884000	16710000	15587000	17165000	19918000	20209000	24062000	22871000	26385000	26160000	32824000	24145000	22842000	22688000	17000000	20610000	15483000	18473000	23874000	28587000	27670000	30801000	38016000	39496000	19444000	32393000	25032000	23448000	25859000	21517000	18939000	23478000	21397000	20692000	15702000	22299000	18376000	15881000	18548000	20403000	20204000
XP_021425750.1	XP_021425750.1	XP_021425750.1 cholesteryl ester transfer protein [Oncorhynchus mykiss]	88604000	82079000	77944000	65332000	67650000	61689000	57590000	57468000	65622000	66485000	102320000	98193000	87330000	91477000	80049000	73526000	129790000	91650000	97660000	92629000	107140000	107380000	105570000	95654000	103460000	87773000	80036000	64373000	75664000	60644000	122610000	119260000	123620000	112060000	112600000	126180000	115800000	141100000	128070000	96682000	94521000	82057000	83416000	79582000	112450000	81552000	86430000
XP_021425771.1	XP_021425771.1	XP_021425771.1 tubulin beta-6 chain-like [Oncorhynchus mykiss]	0	0	0	0	0	0	0	0	0	0	0	0	0	0	0	0	0	0	0	0	2193600	0	2012400	2647200	0	0	0	0	0	0	0	0	0	0	0	0	7081300	0	0	0	17433000	0	0	0	0	0	0
XP_021425824.1	XP_021425824.1	XP_021425824.1 glycerol-3-phosphate dehydrogenase [NAD(+)], cytoplasmic-like [Oncorhynchus mykiss]	0	0	0	0	0	0	0	0	0	0	0	0	0	0	0	0	0	0	0	0	0	0	0	0	0	0	0	0	0	0	0	0	0	0	0	0	0	0	0	0	0	0	0	0	0	0	0
XP_021425831.1	XP_021425831.1	XP_021425831.1 complement C1q-like protein 2 [Oncorhynchus mykiss]	14001000	64078000	58043000	57110000	59480000	70351000	57459000	24765000	38040000	33664000	23545000	94079000	93210000	67454000	82021000	68510000	68628000	31353000	27616000	29966000	0	0	0	0	0	0	0	0	0	0	65867000	118060000	87173000	118240000	109720000	110600000	89795000	66146000	56556000	84921000	35306000	106580000	117610000	112050000	87118000	89010000	64384000
XP_021425913.1	XP_021425913.1	XP_021425913.1 complement C3 alpha chain-like [Oncorhynchus mykiss]	257820000	260570000	256840000	282060000	320880000	338870000	343380000	308870000	284050000	282440000	226640000	237190000	259600000	284560000	303480000	314600000	271510000	289060000	268220000	292080000	208010000	244620000	224890000	250020000	304290000	343160000	306240000	320130000	336680000	328060000	300400000	330310000	313180000	316510000	385920000	393330000	314660000	353760000	269750000	256930000	222230000	225790000	205970000	231060000	228400000	242330000	248250000
XP_021425936.1;XP_021425935.1;XP_021425954.1	XP_021425936.1;XP_021425935.1;XP_021425954.1	XP_021425936.1 complement C3-like isoform X2 [Oncorhynchus mykiss];XP_021425935.1 complement C3-like isoform X1 [Oncorhynchus mykiss];XP_021425954.1 A.superbus venom factor 2-like [Oncorhynchus mykiss]	71327000	77938000	84469000	82948000	113190000	123050000	126160000	102730000	90007000	91314000	158970000	101460000	140390000	133100000	146280000	153090000	217510000	150590000	136750000	125200000	85975000	80209000	77516000	81661000	99696000	95798000	104440000	103980000	98548000	97272000	96494000	99974000	98201000	103570000	115630000	123760000	98217000	113760000	88278000	73391000	78817000	73453000	75040000	76228000	77476000	94652000	92987000
XP_021425947.1	XP_021425947.1	XP_021425947.1 venom factor-like [Oncorhynchus mykiss]	0	0	0	0	0	0	0	0	0	0	0	0	0	0	0	0	0	0	0	0	0	0	0	0	0	0	0	0	0	0	0	0	0	0	0	0	0	0	0	0	0	0	0	0	0	0	0
XP_021425952.1	XP_021425952.1	XP_021425952.1 venom factor-like, partial [Oncorhynchus mykiss]	139040000	146040000	158080000	163780000	207250000	233520000	217010000	218770000	195270000	206700000	172620000	182660000	168960000	201660000	183280000	187600000	286460000	182530000	173600000	191100000	220050000	214540000	207760000	229870000	269010000	303400000	295030000	281540000	274900000	303500000	294250000	280160000	324390000	308590000	387090000	349730000	275780000	315690000	262270000	226710000	141320000	157240000	160510000	173920000	167030000	207890000	193590000
XP_021426230.1	XP_021426230.1	XP_021426230.1 vitamin K-dependent protein S [Oncorhynchus mykiss]	0	0	0	0	0	0	0	0	0	0	0	0	0	0	0	0	0	0	12036000	10416000	0	0	0	0	0	0	0	0	0	0	0	0	0	0	6561500	0	0	0	0	0	8200700	9417900	8802100	10125000	8984700	12089000	8042800
XP_021426319.1	XP_021426319.1	XP_021426319.1 serine protease 23 [Oncorhynchus mykiss]	0	0	0	0	0	0	0	0	0	0	0	0	0	0	0	4048400	0	0	0	0	8052000	10006000	7067700	6500100	4726700	6489000	5443300	5027400	4960200	5228300	6794700	5627800	0	5272700	6324800	5798800	6339500	5012500	5338500	6132200	5155500	0	3684900	0	0	6340400	6123600
XP_021426421.1;XP_021426398.1	XP_021426421.1;XP_021426398.1	XP_021426421.1 actin-related protein 2/3 complex subunit 2 [Oncorhynchus mykiss];XP_021426398.1 actin-related protein 2/3 complex subunit 2 [Oncorhynchus mykiss]	0	0	0	0	0	0	0	0	0	0	0	0	0	0	0	0	0	0	0	0	0	0	2365100	0	0	0	0	0	2440000	3949700	0	2266300	0	0	0	0	2030100	0	0	2648600	0	0	2106800	0	2125000	0	0
XP_021448342.1;XP_021426490.1;XP_021426489.1;XP_021448450.1;XP_021426488.1;XP_021426487.1	XP_021448342.1;XP_021426490.1;XP_021426489.1;XP_021448450.1;XP_021426488.1;XP_021426487.1	XP_021448342.1 coagulation factor VII-like [Oncorhynchus mykiss];XP_021426490.1 coagulation factor VII-like isoform X4 [Oncorhynchus mykiss];XP_021426489.1 coagulation factor VII-like isoform X3 [Oncorhynchus mykiss];XP_021448450.1 coagulation factor VII-like [Oncorhynchus mykiss];XP_021426488.1 coagulation factor VII-like isoform X2 [Oncorhynchus mykiss];XP_021426487.1 coagulation factor VII-lik…	23472000	13524000	14488000	23609000	23584000	15581000	16532000	21026000	24171000	22802000	43610000	16671000	24656000	23816000	13541000	18276000	0	22421000	35045000	24263000	28708000	28161000	30730000	23797000	26420000	19891000	17258000	18405000	17185000	14691000	23685000	20494000	23829000	20546000	25751000	27108000	18184000	21771000	19531000	18588000	20720000	19736000	19030000	15629000	24839000	17224000	16848000
XP_021426493.1;XP_021426492.1	XP_021426493.1;XP_021426492.1	XP_021426493.1 coagulation factor VII-like isoform X2 [Oncorhynchus mykiss];XP_021426492.1 coagulation factor VII-like isoform X1 [Oncorhynchus mykiss]	0	0	0	0	0	0	0	0	0	0	0	0	0	0	0	0	0	0	0	0	2971900	3353200	0	0	0	2341300	2616500	0	0	2468000	0	0	2433300	0	4539700	3247300	2364000	2828900	3891800	3621800	0	0	0	0	0	0	3413500
XP_021426497.1	XP_021426497.1	XP_021426497.1 coagulation factor VII-like [Oncorhynchus mykiss]	1471200000	1206700000	1204100000	1200400000	1143000000	1061600000	1259200000	1242500000	1545000000	1356800000	1275700000	1013500000	980510000	924830000	763750000	856640000	782040000	1010900000	1552900000	1116600000	1536700000	1442900000	1364000000	1210900000	1051700000	989820000	1044900000	1051500000	1135600000	1064400000	1323000000	1242700000	1224400000	1257800000	1344200000	1257100000	1049200000	1341400000	1351800000	1218900000	1130400000	1241100000	1177700000	1162400000	1336000000	1149900000	1055500000
XP_021464031.1;XP_021464030.1;XP_021426502.1	XP_021464031.1;XP_021464030.1;XP_021426502.1	XP_021464031.1 coagulation factor X-like [Oncorhynchus mykiss];XP_021464030.1 coagulation factor X-like [Oncorhynchus mykiss];XP_021426502.1 coagulation factor X-like [Oncorhynchus mykiss]	173390000	66662000	56550000	172220000	204730000	72008000	136810000	127970000	200720000	169620000	341390000	41915000	182960000	100640000	39966000	127240000	31266000	143460000	260220000	148910000	188500000	178460000	203220000	160760000	160210000	149080000	135420000	134890000	120000000	122890000	190070000	167030000	158240000	166870000	202340000	184640000	165610000	160020000	173480000	179120000	152540000	138740000	135740000	131440000	148960000	125530000	125870000
XP_021464066.1;XP_021426512.1	XP_021464066.1;XP_021426512.1	XP_021464066.1 tubulin alpha chain-like [Oncorhynchus mykiss];XP_021426512.1 tubulin alpha chain-like [Oncorhynchus mykiss]	0	0	0	0	0	0	0	0	0	0	0	0	0	0	0	0	0	0	0	0	0	0	0	0	0	0	0	0	0	0	0	0	0	0	0	0	0	0	0	0	1089500	0	0	0	0	0	0
XP_021426678.1;XP_021426676.1	XP_021426678.1;XP_021426676.1	XP_021426678.1 uncharacterized protein LOC110495661 isoform X3 [Oncorhynchus mykiss];P_021426676.1 uncharacterized protein LOC110495661 isoform X1 [Oncorhynchus mykiss]	0	0	0	0	0	0	0	0	0	0	0	0	0	0	0	0	0	0	0	0	0	0	0	0	0	0	0	0	0	0	0	0	0	0	0	0	0	0	0	0	0	0	0	0	0	0	0
XP_021426687.1	XP_021426687.1	XP_021426687.1 uncharacterized protein LOC110495663 [Oncorhynchus mykiss]	0	0	0	0	0	0	0	0	0	0	0	0	0	0	0	0	0	0	0	0	0	0	0	0	0	0	0	0	0	0	0	0	0	0	0	0	0	0	0	0	0	0	0	0	0	0	0
XP_021426787.1;XP_021466756.1	XP_021426787.1;XP_021466756.1	XP_021466756.1 immunoglobulin kappa light chain-like [Oncorhynchus mykiss];XP_021466756.1 immunoglobulin kappa light chain-like [Oncorhynchus mykiss]	47596000	37258000	43888000	29707000	34718000	36295000	45834000	50945000	52673000	54108000	59754000	56868000	43867000	51668000	35468000	50627000	63839000	73353000	84227000	79254000	0	23392000	16819000	13807000	14954000	13102000	17977000	16363000	22822000	20461000	15944000	14065000	13310000	12932000	16417000	22458000	17807000	25901000	20708000	20212000	110560000	95748000	101570000	69194000	86122000	106690000	108320000
XP_021427176.1	XP_021427176.1	XP_021427176.1 carboxypeptidase B2-like [Oncorhynchus mykiss]	20885000	17958000	17637000	16560000	14419000	14853000	14771000	15643000	12758000	13518000	18695000	15735000	14642000	14410000	0	12917000	15720000	14902000	16069000	16022000	14596000	15653000	12640000	12743000	10718000	10615000	11238000	9522100	10241000	10382000	15060000	14785000	12704000	14324000	16477000	17792000	10239000	14914000	13701000	10899000	11099000	7412200	9303700	8984900	10853000	8936000	10373000
XP_021427192.1;XP_021451602.1;XP_021447503.1	XP_021427192.1	XP_021427192.1 neuropilin-2-like [Oncorhynchus mykiss]	18951000	12093000	13335000	10717000	11518000	12327000	13729000	15815000	10427000	11753000	12073000	6926600	8443900	8194900	10956000	9757900	12167000	13099000	12797000	8181400	10745000	11817000	0	0	0	0	0	0	13144000	0	0	0	0	0	0	11042000	9584000	15369000	0	0	15805000	12758000	0	0	14199000	0	0
XP_021451160.1;XP_021451159.1;XP_021450976.1;XP_021427294.1	XP_021451160.1;XP_021451159.1;XP_021450976.1;XP_021427294.1	XP_021451160.1 ictacalcin-like isoform X2 [Oncorhynchus mykiss];XP_021451159.1 ictacalcin-like isoform X1 [Oncorhynchus mykiss];XP_021450976.1 ictacalcin-like [Oncorhynchus mykiss];XP_021427294.1 ictacalcin-like [Oncorhynchus mykiss]	0	0	0	0	0	0	0	3052000	0	4600300	0	0	2610400	0	4166200	0	0	0	0	0	0	9642000	12521000	0	6395000	5598600	4224700	0	3797100	6116000	0	0	0	0	0	5743600	0	0	5248800	5778900	0	0	4569400	0	3722800	4912700	0
XP_021427646.1	XP_021427646.1	XP_021427646.1 C-type lectin domain family 4 member M-like [Oncorhynchus mykiss]	0	0	0	0	0	0	0	0	0	0	0	0	0	0	0	0	0	0	0	0	5070300	0	5127900	4670700	4968300	4274200	4170500	5332500	5648000	5653300	5973400	4757300	6138800	6626000	7252000	4446100	5589400	6906800	5769200	4952200	6516000	0	5437700	5355300	7371100	4843100	4820900
XP_021427651.1;XP_021427650.1;XP_021427649.1	XP_021427651.1;XP_021427650.1;XP_021427649.1	XP_021427651.1 ladderlectin isoform X3 [Oncorhynchus mykiss];XP_021427650.1 ladderlectin isoform X2 [Oncorhynchus mykiss];XP_021427649.1 ladderlectin isoform X1 [Oncorhynchus mykiss]	62410000	42633000	40721000	41676000	42565000	38018000	35621000	38363000	38991000	41195000	76002000	73978000	69842000	74628000	68519000	63179000	22858000	80986000	80920000	70435000	171980000	169540000	135050000	120240000	137300000	106050000	109980000	93662000	87998000	68559000	126040000	110350000	110560000	112690000	143210000	136510000	123440000	155160000	139710000	104160000	101490000	104950000	98180000	94487000	93578000	106390000	96198000
XP_021427718.1	XP_021427718.1	XP_021427718.1 ectonucleotide pyrophosphatase/phosphodiesterase family member 2-like [Oncorhynchus mykiss]	12198000	11617000	14154000	10820000	9763500	12581000	12718000	14134000	12351000	15275000	11742000	14932000	11554000	10632000	12799000	8308300	15674000	11646000	10281000	10790000	10645000	8994200	10273000	7854400	6278200	11715000	8516700	9409800	7113000	7781500	8923800	7356000	8104200	7904800	9817200	8769200	11869000	9617600	9301600	6543100	9133200	8940400	12639000	13250000	8192900	12299000	11423000
XP_021427891.1	XP_021427891.1	XP_021427891.1 type-4 ice-structuring protein [Oncorhynchus mykiss]	347890000	344140000	344410000	364080000	280270000	306590000	358620000	268790000	246080000	192500000	669820000	683400000	586690000	547850000	704570000	458040000	38444000	404540000	902810000	538670000	1118000000	969000000	1077400000	1271100000	994270000	565380000	455470000	145690000	1226200000	121150000	179200000	121310000	169080000	245260000	410460000	336350000	258760000	183340000	117590000	219650000	399410000	158020000	175950000	172120000	117490000	145740000	133210000
XP_021428141.1;XP_021417764.1	XP_021428141.1	XP_021428141.1 biotinidase-like [Oncorhynchus mykiss]	1228800000	948400000	1017300000	1334500000	1729200000	1996600000	2218900000	2489100000	2186300000	2147900000	804810000	804890000	877240000	1181500000	1401500000	1268700000	908520000	1558900000	1372900000	1245300000	691610000	575470000	549020000	758590000	1181100000	1885600000	2004600000	1966700000	2231100000	2634000000	1426000000	1640400000	1826400000	1710600000	1840700000	1718300000	1872400000	1645900000	1370100000	1387600000	610530000	844410000	1005000000	1117100000	987050000	1317000000	1338100000
XP_021428324.1	XP_021428324.1	XP_021428324.1 collagen alpha-2(I) chain [Oncorhynchus mykiss]	0	0	0	3564600	0	3871300	0	0	2100000	2605300	0	0	0	0	3238900	4038200	0	0	0	0	5115000	2738800	8135400	0	3321100	3535100	0	0	0	0	3508700	0	0	5608500	4307600	4526500	2160200	2807400	0	0	4713100	2527600	2899400	3859400	5099600	4019300	2623200
XP_021428326.1	XP_021428326.1	XP_021428326.1 tissue factor pathway inhibitor 2-like [Oncorhynchus mykiss]	0	0	0	0	0	0	0	0	0	0	0	0	0	0	0	0	0	0	0	0	0	0	0	0	0	0	0	0	0	0	0	0	0	0	0	0	0	0	0	0	0	0	0	0	0	0	0
XP_021428520.1	XP_021428520.1	XP_021428520.1 immunoglobulin lambda-like polypeptide 5 [Oncorhynchus mykiss]	230490000	226790000	239710000	181390000	180410000	191430000	227960000	286410000	280400000	278180000	323180000	284460000	279040000	238030000	234970000	216540000	319250000	314590000	375250000	300630000	277620000	309030000	241560000	187930000	184360000	183160000	213480000	195720000	218970000	138050000	492980000	454740000	430330000	414240000	484460000	529730000	463590000	530230000	618110000	370520000	433860000	375890000	329680000	304920000	374830000	385250000	406440000
XP_021428691.1	XP_021428691.1	XP_021428691.1 coagulation factor VII-like, partial [Oncorhynchus mykiss]	39637000	37538000	43523000	49060000	40733000	34792000	44346000	38250000	46448000	48891000	34212000	34742000	36516000	42027000	21863000	30324000	28367000	32926000	43925000	46128000	57912000	65452000	64527000	65358000	55255000	43307000	57552000	56047000	50131000	53479000	93267000	62803000	79898000	86579000	98016000	102930000	76707000	83890000	74373000	79568000	70399000	91076000	106250000	77914000	78859000	97570000	97554000
XP_021429087.1;XP_021429086.1;XP_021450267.1;XP_021451689.1;XP_021448810.1;XP_021475136.1;XP_021475135.1;XP_021475134.1;XP_021452036.1	XP_021429087.1;XP_021429086.1;XP_021450267.1;XP_021451689.1;XP_021448810.1;XP_021475136.1;XP_021475135.1;XP_021475134.1	XP_021429087.1 acidic leucine-rich nuclear phosphoprotein 32 family member B-like isoform X2 [Oncorhynchus mykiss];XP_021429086.1 acidic leucine-rich nuclear phosphoprotein 32 family member B-like isoform X1 [Oncorhynchus mykiss];XP_021450267.1 acidic leucine-rich nuclear phosphoprotein 32 family member B-like [Oncorhynchus mykiss];XP_021451689.1 acidic leucine-rich nuclear phosphoprotein 32 fami…	0	0	0	0	0	0	0	0	0	0	0	0	0	0	0	0	0	0	0	0	0	0	0	0	0	0	0	0	0	0	0	0	0	0	0	0	0	0	0	0	9812900	0	0	0	0	0	0
XP_021429142.1;XP_021475050.1	XP_021429142.1;XP_021475050.1	XP_021429142.1 high mobility group protein B2-like [Oncorhynchus mykiss];XP_021475050.1 high mobility group protein B2-like [Oncorhynchus mykiss]	0	0	0	0	0	0	0	0	0	0	0	0	0	0	0	0	0	0	0	0	0	0	0	0	0	0	0	0	0	0	0	0	0	0	0	0	0	0	0	0	54098000	0	0	0	0	0	5120300
XP_021429234.1;XP_021429233.1	XP_021429234.1;XP_021429233.1	XP_021429234.1 fibrinogen gamma chain-like isoform X2 [Oncorhynchus mykiss];XP_021429233.1 fibrinogen gamma chain-like isoform X1 [Oncorhynchus mykiss]	254690000	174020000	145690000	113970000	85995000	179690000	167400000	162960000	154440000	142920000	114610000	70262000	61929000	43849000	39737000	85162000	123180000	78984000	56532000	75359000	243390000	180860000	127680000	142660000	84218000	207120000	179090000	165850000	122860000	169940000	155620000	103680000	132700000	115710000	174430000	182990000	161230000	165380000	132770000	131560000	90253000	100430000	97405000	89475000	103560000	139830000	148770000
XP_021429342.1	XP_021429342.1	XP_021429342.1 plasma protease C1 inhibitor-like [Oncorhynchus mykiss]	1010700000	1196900000	1217600000	1334100000	1303700000	1456600000	1550500000	1248500000	1861700000	1462900000	593430000	534860000	643250000	838120000	769940000	664770000	1131400000	928360000	1322900000	1316400000	1436300000	1128500000	1376000000	1267700000	1166000000	1554300000	1502000000	1733900000	1461400000	1918500000	2048600000	1732500000	1775300000	1803200000	1471500000	1621700000	2042300000	1386900000	1471300000	1339600000	1315500000	624620000	1941700000	1318300000	1460700000	1778500000	1743600000
XP_021474241.1;XP_021467953.1;XP_021463905.1;XP_021456692.1;XP_021446869.1;XP_021443085.1;XP_021440806.1;XP_021437518.1;XP_021435953.1;XP_021429737.1	XP_021474241.1;XP_021467953.1;XP_021463905.1;XP_021456692.1;XP_021446869.1;XP_021443085.1;XP_021440806.1;XP_021437518.1;XP_021435953.1;XP_021429737.1	XP_021474241.1 calmodulin [Oncorhynchus mykiss];XP_021467953.1 calmodulin [Oncorhynchus mykiss];XP_021463905.1 calmodulin-2 [Oncorhynchus mykiss];XP_021456692.1 calmodulin [Oncorhynchus mykiss];XP_021446869.1 calmodulin isoform X1 [Oncorhynchus mykiss];XP_021443085.1 calmodulin [Oncorhynchus mykiss];XP_021440806.1 calmodulin-1 [Oncorhynchus mykiss];XP_021437518.1 calmodulin [Oncorhynchus mykiss];…	0	0	0	0	0	0	0	0	0	0	0	0	0	0	0	0	0	0	0	0	0	0	0	0	0	0	0	0	989460	0	0	0	0	1264100	0	0	0	0	0	0	14712000	0	0	0	0	1195300	0
XP_021429857.1	XP_021429857.1	XP_021429857.1 poly(U)-specific endoribonuclease-C-like [Oncorhynchus mykiss]	0	0	0	0	0	0	0	0	0	0	0	0	0	0	0	0	0	0	0	0	0	0	0	0	0	0	0	0	0	0	0	0	0	0	0	0	0	0	0	0	0	0	0	0	0	0	0
XP_021429991.1	XP_021429991.1	XP_021429991.1 LOW QUALITY PROTEIN: protein Z-dependent protease inhibitor-like [Oncorhynchus mykiss]	0	5160000	5352300	0	4433200	3751000	4365600	3517700	3496300	5770400	0	4039200	0	0	0	0	0	0	0	5404500	3705500	2892900	3055700	5746200	3850300	4739200	4829300	4437100	4933500	5604400	7345700	7065800	9267500	9186600	5358400	8182000	12770000	10972000	6101500	7999400	0	0	5965600	6237700	0	5086900	4963000
XP_021430527.1;XP_021438740.1	XP_021430527.1	XP_021430527.1 bifunctional epoxide hydrolase 2-like [Oncorhynchus mykiss]	0	0	0	0	0	0	0	0	0	0	0	0	0	0	0	0	0	0	0	0	0	0	0	0	0	0	0	0	0	0	0	2490400	0	3488500	0	0	4095500	3064500	0	3450100	0	0	0	0	0	0	0
XP_021475102.1;XP_021430967.1;XP_021429104.1	XP_021475102.1;XP_021430967.1;XP_021429104.1	XP_021475102.1 SWI/SNF-related matrix-associated actin-dependent regulator of chromatin subfamily A member 5-like [Oncorhynchus mykiss];XP_021430967.1 SWI/SNF-related matrix-associated actin-dependent regulator of chromatin subfamily A member 5-like [Oncorhynchus mykiss];XP_021429104.1 SWI/SNF-related matrix-associated actin-dependent regulator of chromatin subfamily A member 5-like [Oncorhynchus…	0	153250000	0	308970000	2176600000	0	2462100000	2376000000	2514200000	2700700000	0	2165900000	0	0	0	0	2889200000	0	0	0	3296500000	1419700000	1625900000	1714900000	1659100000	2712800000	2025000000	1928700000	2157700000	2699600000	4963900000	4386800000	4352100000	2236700000	3207700000	0	4732800000	1709800000	4798300000	3136100000	700950000	0	2219100000	2413000000	881660000	2218300000	2364700000
XP_021431029.1;XP_021436936.1;NP_001182340.1	XP_021431029.1;XP_021436936.1;NP_001182340.1	XP_021431029.1 parvalbumin-2 isoform X1 [Oncorhynchus mykiss];XP_021436936.1 parvalbumin beta 2-like [Oncorhynchus mykiss];NP_001182340.1 parvalbumin-2 [Oncorhynchus mykiss]	0	0	0	0	0	0	0	0	0	0	0	0	0	0	0	0	0	0	0	0	0	0	0	0	0	0	0	0	0	0	0	0	0	0	0	0	0	0	0	0	0	0	0	0	0	0	0
XP_021431107.1;XP_021431106.1	XP_021431107.1;XP_021431106.1	XP_021431107.1 fructose-bisphosphate aldolase A-like [Oncorhynchus mykiss];XP_021431106.1 fructose-bisphosphate aldolase A-like [Oncorhynchus mykiss]	0	11177000	14096000	0	0	8477200	0	0	0	0	0	0	0	0	0	0	0	0	0	0	0	0	0	0	0	0	33080000	0	0	0	0	0	0	14759000	0	0	0	0	0	0	13635000	0	0	0	0	0	17670000
XP_021431692.1;XP_021431691.1;XP_021431690.1	XP_021431692.1;XP_021431691.1;XP_021431690.1	XP_021431692.1 uncharacterized protein LOC110499107 isoform X2 [Oncorhynchus mykiss];XP_021431691.1 uncharacterized protein LOC110499107 isoform X1 [Oncorhynchus mykiss];XP_021431690.1 uncharacterized protein LOC110499107 isoform X1 [Oncorhynchus mykiss]	14786000	0	0	0	0	0	0	9013100	0	0	0	0	0	0	0	23403000	0	22259000	0	0	0	0	0	0	0	9454500	0	0	0	0	0	0	0	0	0	21052000	0	0	0	0	0	0	0	0	24582000	0	17602000
XP_021431955.1	XP_021431955.1	XP_021431955.1 glucose-6-phosphate isomerase-like [Oncorhynchus mykiss]	5744400	9528800	13890000	26992000	32514000	26506000	23324000	30956000	36907000	32007000	0	7550500	14859000	20981000	26803000	22755000	10087000	21371000	21524000	36324000	10137000	9966600	15333000	22346000	34731000	23742000	22946000	30581000	40083000	55617000	16067000	26249000	23586000	28953000	26531000	26940000	21558000	28910000	34735000	55941000	15181000	15001000	13302000	17796000	25235000	17743000	17383000
XP_021431988.1	XP_021431988.1	XP_021431988.1 angiotensinogen [Oncorhynchus mykiss]	602520000	615410000	627510000	676230000	692670000	664920000	640500000	685430000	650370000	636750000	503560000	604760000	552640000	714530000	777090000	659920000	164740000	610600000	550080000	576230000	623700000	670060000	622810000	621990000	663750000	623070000	641330000	820540000	874310000	861150000	641520000	754900000	861510000	817830000	810920000	818060000	810890000	875580000	726590000	707020000	499410000	598800000	645580000	599270000	624800000	682660000	664100000
XP_021432291.1;XP_021432288.1;XP_021432292.1;XP_021432290.1	XP_021432291.1;XP_021432288.1;XP_021432292.1	XP_021432291.1 cystatin-like [Oncorhynchus mykiss];XP_021432288.1 cystatin-like [Oncorhynchus mykiss];XP_021432292.1 cystatin-like [Oncorhynchus mykiss]	0	0	0	0	0	0	0	0	0	0	0	0	0	0	0	0	0	0	0	0	0	3854700	0	0	0	0	0	2889100	0	3404900	0	3566400	0	0	0	4320300	0	0	0	0	4265300	3858800	0	0	3808400	0	0
XP_021432488.1;XP_021419966.1	XP_021432488.1	XP_021432488.1 fish-egg lectin-like [Oncorhynchus mykiss]	65226000	71218000	75261000	65596000	80169000	93073000	86844000	76079000	58596000	75294000	70325000	67524000	69472000	78432000	73352000	80755000	122310000	71490000	72772000	69380000	131840000	137200000	108330000	106900000	113400000	98015000	112480000	133390000	163340000	148500000	228970000	222180000	210500000	192230000	226360000	220710000	215270000	313640000	250980000	172430000	66970000	78816000	61658000	59063000	87459000	85191000	87149000
XP_021432624.1;XP_021432623.1	XP_021432624.1;XP_021432623.1	XP_021432624.1 lumican-like [Oncorhynchus mykiss];XP_021432623.1 lumican-like [Oncorhynchus mykiss]	1700600000	1326800000	1282400000	1257400000	1297100000	1352800000	1231800000	1242600000	1125300000	1021200000	1047500000	939410000	884640000	819190000	849460000	953430000	309970000	943600000	914570000	936740000	989810000	888220000	765020000	725170000	767760000	779170000	685110000	672970000	605200000	568930000	1183800000	1085900000	923300000	913970000	1054200000	1007100000	1039100000	1138500000	1101200000	843410000	1289300000	1338900000	1148500000	1006500000	1056500000	1048400000	998110000
XP_021460013.1;XP_021432645.1;XP_021430658.1;XP_021467115.1;XP_021456708.1;XP_021456660.1;XP_021440429.1;XP_021436999.1;XP_021431978.1;XP_021429777.1;XP_021423630.1;XP_021412737.1;XP_021431436.1	XP_021460013.1;XP_021432645.1;XP_021430658.1;XP_021467115.1;XP_021456708.1;XP_021456660.1;XP_021440429.1;XP_021436999.1;XP_021431978.1;XP_021429777.1;XP_021423630.1;XP_021412737.1;XP_021431436.1	XP_021460013.1 actin, alpha cardiac muscle 1-like [Oncorhynchus mykiss];XP_021432645.1 actin, alpha cardiac muscle 1-like [Oncorhynchus mykiss];XP_021430658.1 actin-85C-like [Oncorhynchus mykiss];XP_021467115.1 actin, alpha cardiac-like [Oncorhynchus mykiss];XP_021456708.1 actin, alpha cardiac [Oncorhynchus mykiss];XP_021456660.1 actin, alpha cardiac muscle 1-like [Oncorhynchus mykiss];XP_0214404…	0	0	0	0	0	0	0	0	0	0	0	0	0	0	0	0	0	0	0	0	0	0	0	0	0	0	0	0	0	0	0	0	0	0	0	0	0	0	0	0	0	0	0	0	0	0	0
XP_021432939.1;XP_021432938.1	XP_021432939.1;XP_021432938.1	XP_021432939.1 transcription termination factor 1-like isoform X2 [Oncorhynchus mykiss];XP_021432938.1 transcription termination factor 1-like isoform X1 [Oncorhynchus mykiss]	0	0	0	0	0	0	0	0	0	0	0	0	0	0	0	0	0	0	0	0	0	0	0	0	0	0	0	0	0	0	0	0	0	0	0	0	0	0	0	0	0	0	0	0	0	0	0
XP_021432976.1;XP_021432975.1	XP_021432976.1;XP_021432975.1	XP_021432976.1 inter-alpha-trypsin inhibitor heavy chain H2-like isoform X2 [Oncorhynchus mykiss];XP_021432975.1 inter-alpha-trypsin inhibitor heavy chain H2-like isoform X1 [Oncorhynchus mykiss]	442190000	360080000	338770000	395900000	353290000	446310000	408290000	399530000	333090000	398390000	546630000	440460000	399870000	438660000	463680000	529090000	603830000	457840000	391320000	473140000	593100000	514920000	466760000	490900000	425490000	533790000	530030000	462920000	490480000	491570000	539130000	456990000	509450000	539620000	741350000	653130000	534580000	638980000	524540000	454890000	340300000	398830000	434720000	421560000	450440000	452090000	388090000
XP_021433186.1	XP_021433186.1	XP_021433186.1 leukotriene A-4 hydrolase-like [Oncorhynchus mykiss]	0	0	0	0	0	0	0	0	0	0	0	0	0	0	0	0	0	0	0	0	0	0	0	0	0	0	0	0	0	0	0	0	0	0	0	0	0	0	0	0	0	0	0	0	0	0	0
XP_021433220.1;XP_021433219.1;XP_021419099.1	XP_021433220.1;XP_021433219.1;XP_021419099.1	XP_021433220.1 L-lactate dehydrogenase B chain-like [Oncorhynchus mykiss];XP_021433219.1 L-lactate dehydrogenase B chain-like [Oncorhynchus mykiss];XP_021419099.1 L-lactate dehydrogenase B chain [Oncorhynchus mykiss]	0	0	0	0	0	0	0	0	0	0	0	0	0	0	0	0	0	0	0	0	0	0	0	0	0	0	0	0	0	0	0	0	0	0	0	0	0	0	0	0	0	0	0	0	0	0	0
XP_021433487.1	XP_021433487.1	XP_021433487.1 complement C1q-like protein 2 [Oncorhynchus mykiss]	7858100	7208800	7412600	18087000	23317000	16901000	21225000	14312000	10004000	14442000	0	0	7214300	10245000	11759000	11277000	13518000	9589400	8961000	7523300	6750700	5239000	7269600	8530800	12708000	15572000	14948000	19917000	22829000	38317000	6381100	16211000	9734400	10080000	9921400	10303000	6804100	7405500	5045600	0	0	12186000	10616000	10177000	13448000	12417000	14671000
XP_021433517.1;XP_021472765.1;XP_021478030.1	XP_021433517.1	XP_021433517.1 coagulation factor XIII A chain-like [Oncorhynchus mykiss]	84931000	59856000	56762000	55593000	57841000	47138000	33481000	40747000	30234000	38178000	84944000	66752000	76357000	85684000	37427000	85977000	12579000	50634000	43545000	46295000	49772000	51458000	45445000	36642000	34173000	28525000	28469000	22732000	25766000	17670000	75787000	66857000	58599000	51063000	58288000	57781000	58918000	67106000	53329000	36110000	112750000	50598000	48482000	56604000	42592000	62305000	58689000
XP_021477838.1;XP_021470855.1;XP_021462303.1;XP_021457626.1;XP_021448455.1;XP_021446169.1;XP_021433789.1;XP_021446168.1;XP_021477836.1;XP_021449894.1;XP_021426424.1;XP_021426407.1	XP_021477838.1;XP_021470855.1;XP_021462303.1;XP_021457626.1;XP_021448455.1;XP_021446169.1;XP_021433789.1;XP_021446168.1;XP_021477836.1	XP_021477838.1 histone H2A.V isoform X2 [Oncorhynchus mykiss];XP_021470855.1 histone H2A.Z [Oncorhynchus mykiss];XP_021462303.1 histone H2A.V [Oncorhynchus mykiss];XP_021457626.1 histone H2A.V [Oncorhynchus mykiss];XP_021448455.1 histone H2A.V-like [Oncorhynchus mykiss];XP_021446169.1 histone H2A.V isoform X2 [Oncorhynchus mykiss];XP_021433789.1 histone H2A.Z [Oncorhynchus mykiss];XP_021446168.1 …	0	0	0	0	5279400	0	0	0	0	0	0	0	0	0	0	0	0	0	0	0	0	0	0	0	0	0	0	0	0	0	0	0	0	0	0	0	0	0	0	0	55160000	0	0	0	0	0	0
XP_021433884.1	XP_021433884.1	XP_021433884.1 ependymin-like [Oncorhynchus mykiss]	29727000	23881000	25316000	18814000	22202000	21878000	14278000	19005000	17339000	18143000	18329000	17254000	13203000	14992000	18520000	15082000	22868000	19207000	20790000	18303000	32880000	33676000	26958000	21503000	26104000	23057000	23224000	28922000	27468000	26349000	16613000	14908000	15135000	15000000	15113000	18643000	11780000	18708000	14466000	11528000	22162000	19402000	17899000	17072000	17703000	19483000	21884000
XP_021433963.1	XP_021433963.1	XP_021433963.1 pyruvate kinase PKM-like [Oncorhynchus mykiss]	0	4502000	17800000	8515100	0	7243600	7703600	1220200	0	0	16130000	10132000	0	0	0	0	0	0	0	2074000	26521000	11002000	2516400	2465700	8953300	6108400	65059000	0	0	13588000	0	0	0	15137000	0	0	0	0	0	2910100	26635000	0	2579800	6630500	4985700	0	43398000
XP_021434023.1;XP_021470206.1;XP_021470205.1;XP_021434022.1;XP_021450829.1	XP_021434023.1;XP_021470206.1;XP_021470205.1;XP_021434022.1	XP_021434023.1 beta-enolase-like isoform X2 [Oncorhynchus mykiss];XP_021470206.1 beta-enolase isoform X2 [Oncorhynchus mykiss];XP_021470205.1 beta-enolase isoform X1 [Oncorhynchus mykiss];XP_021434022.1 beta-enolase-like isoform X1 [Oncorhynchus mykiss]	235230000	266010000	174980000	222830000	131650000	134540000	116540000	52203000	62977000	55229000	141430000	381900000	195000000	184750000	126940000	73731000	0	30854000	21053000	177420000	126280000	120260000	69584000	59149000	77069000	55680000	185050000	121700000	163010000	113160000	21684000	56915000	33568000	148060000	40239000	39849000	42975000	37951000	22880000	64799000	185000000	54876000	48520000	66466000	92372000	57556000	145440000
XP_021434083.1	XP_021434083.1	XP_021434083.1 calcium/calmodulin-dependent protein kinase type II delta 1 chain-like [Oncorhynchus mykiss]	100450000	95872000	96228000	94021000	80817000	60683000	71517000	73169000	71197000	67027000	69395000	67445000	76957000	68825000	69668000	74731000	71827000	64357000	82312000	60737000	124030000	134570000	121900000	100340000	93574000	82950000	97248000	77496000	67680000	59141000	104030000	98166000	116320000	106900000	112010000	120140000	92297000	113690000	99210000	66254000	119900000	95511000	108820000	96500000	97446000	102510000	95614000
XP_021434199.1	XP_021434199.1	>XP_021434199.1 immunoglobulin lambda-1 light chain-like, partial [Oncorhynchus mykiss]	134780000	133880000	121840000	106460000	108350000	127760000	136780000	200200000	222350000	312770000	158570000	156270000	119620000	124270000	125770000	111420000	217220000	188000000	215970000	189400000	216800000	211950000	162740000	133560000	147200000	135690000	151670000	197390000	245610000	187660000	46255000	46510000	33806000	32354000	43065000	52509000	54841000	135360000	175520000	139450000	109620000	123150000	94958000	84018000	106960000	119400000	123700000
XP_021434215.1	XP_021434215.1	XP_021434215.1 centrosomal protein of 83 kDa [Oncorhynchus mykiss]	0	0	0	0	0	0	0	0	0	0	0	0	0	0	0	0	0	0	0	0	0	0	0	0	0	0	0	0	0	0	0	0	0	0	0	0	0	0	0	0	0	0	0	0	0	0	0
XP_021434377.1;XP_021434375.1;XP_021434379.1;XP_021434378.1;XP_021434376.1;XP_021434374.1;XP_021434373.1	XP_021434377.1;XP_021434375.1;XP_021434379.1;XP_021434378.1;XP_021434376.1;XP_021434374.1;XP_021434373.1	XP_021434377.1 collagen alpha-3(VI) chain isoform X5 [Oncorhynchus mykiss];XP_021434375.1 collagen alpha-3(VI) chain isoform X3 [Oncorhynchus mykiss];XP_021434379.1 collagen alpha-3(VI) chain isoform X7 [Oncorhynchus mykiss];XP_021434378.1 collagen alpha-3(VI) chain isoform X6 [Oncorhynchus mykiss];XP_021434376.1 collagen alpha-3(VI) chain isoform X4 [Oncorhynchus mykiss];XP_021434374.1 collagen …	18812000	10732000	12657000	11934000	9083300	9431500	7445700	6740400	9301300	6413400	8850600	7245000	5958300	5121300	4673100	6752600	0	5163800	5914800	4167900	17882000	16033000	0	7558800	8202900	6059800	0	8583000	0	0	6991500	0	0	0	12200000	7687800	8322900	11381000	0	0	8191300	11013000	0	4751700	0	7170900	0
XP_021434557.1	XP_021434557.1	XP_021434557.1 coagulation factor V-like [Oncorhynchus mykiss]	162510000	145450000	119780000	119910000	149800000	119620000	128750000	135630000	166990000	138040000	216050000	149620000	138970000	133950000	143970000	147690000	7424600	161990000	201630000	159460000	180520000	158590000	144920000	124890000	138010000	141610000	120190000	101180000	99112000	99954000	141280000	107240000	127140000	115690000	158730000	163010000	129440000	177130000	135500000	128120000	113880000	117720000	107030000	108200000	146540000	133690000	118240000
XP_021434612.1	XP_021434612.1	XP_021434612.1 thymosin beta-12 [Oncorhynchus mykiss]	0	0	0	0	0	0	0	0	0	0	0	0	0	0	0	0	0	0	0	0	0	0	0	0	0	0	0	0	0	0	0	0	0	0	0	0	0	0	0	0	30647000	0	0	0	0	0	0
XP_021452602.1;XP_021434936.1;XP_021464407.1;XP_021426983.1;XP_021418177.1;XP_021418176.1	XP_021452602.1;XP_021434936.1;XP_021464407.1;XP_021426983.1	XP_021452602.1 actin-related protein 3-like [Oncorhynchus mykiss];XP_021434936.1 actin-related protein 3-like [Oncorhynchus mykiss];XP_021464407.1 actin-related protein 3 [Oncorhynchus mykiss];XP_021426983.1 actin-related protein 3-like [Oncorhynchus mykiss]	0	0	0	0	5023700	0	0	0	3808900	0	0	2953800	0	3954300	2988800	4350100	0	0	0	0	0	0	2201400	2967900	3630200	2768500	3173000	3365100	3695400	4404600	3157900	3524400	3879800	4244900	3927700	3594100	2648900	4091600	3709300	4016800	4237100	0	0	2656300	0	2585200	1919700
XP_021453470.1;XP_021434992.1	XP_021453470.1;XP_021434992.1	XP_021453470.1 follistatin-related protein 1-like [Oncorhynchus mykiss];XP_021434992.1 follistatin-related protein 1-like [Oncorhynchus mykiss]	0	0	0	0	0	0	0	0	0	0	0	0	0	0	0	0	0	0	0	0	0	0	0	0	0	0	0	0	0	0	0	0	0	0	2293600	0	1065000	0	1004400	0	0	0	0	0	0	0	0
XP_021435170.1	XP_021435170.1	XP_021435170.1 plastin-2 [Oncorhynchus mykiss]	0	0	0	0	0	0	0	0	0	0	0	0	0	0	0	0	0	0	0	0	0	0	0	0	0	0	0	0	0	0	0	0	0	0	0	0	0	0	0	0	0	0	0	0	0	0	0
XP_021448283.1;XP_021435513.1;XP_021435512.1;XP_021435511.1;XP_021435510.1;XP_021435509.1;XP_021446286.1;NP_001118163.1;XP_021424713.1;XP_021472184.1	XP_021448283.1;XP_021435513.1;XP_021435512.1;XP_021435511.1;XP_021435510.1;XP_021435509.1;XP_021446286.1;NP_001118163.1;XP_021424713.1	XP_021448283.1 tubulin alpha chain-like [Oncorhynchus mykiss];XP_021435513.1 tubulin alpha chain-like [Oncorhynchus mykiss];XP_021435512.1 tubulin alpha chain isoform X4 [Oncorhynchus mykiss];XP_021435511.1 tubulin alpha chain isoform X3 [Oncorhynchus mykiss];XP_021435510.1 tubulin alpha chain isoform X2 [Oncorhynchus mykiss];XP_021435509.1 tubulin alpha chain isoform X1 [Oncorhynchus mykiss];XP_…	0	0	0	0	0	0	0	0	0	0	2203100	0	3302600	2309000	0	7344600	0	0	0	0	0	982020	786870	0	0	0	1004100	0	985740	0	0	0	808590	1808600	0	0	2567200	0	0	1423400	81900000	0	0	0	0	4804700	2110400
XP_021436350.1	XP_021436350.1	XP_021436350.1 uncharacterized protein LOC110502557 [Oncorhynchus mykiss]	97146000	142770000	193900000	216630000	353890000	286040000	349070000	342570000	309450000	303990000	118060000	184750000	292910000	338870000	479120000	426360000	573590000	376990000	295130000	267280000	83909000	109310000	94671000	156740000	231640000	281440000	268780000	350710000	366190000	423520000	118480000	203820000	159350000	150270000	140150000	133980000	131460000	117960000	139880000	167720000	141840000	279510000	265150000	268290000	237500000	251210000	267180000
XP_021436581.1	XP_021436581.1	XP_021436581.1 LOW QUALITY PROTEIN: von Willebrand factor-like [Oncorhynchus mykiss]	10825000	9131700	9062600	7055900	7616400	8684600	7738600	8464200	7238300	10465000	11992000	8199100	10031000	8995400	9110900	9244000	13522000	11254000	9494000	8920900	8884200	8097400	6999100	7810900	7020000	8696200	8246200	11063000	7925500	6762000	8992300	9235200	7680800	6628600	8112900	8276000	8672600	10666000	9214600	7278800	4971600	7654300	5415100	4904800	5425000	6480000	7214400
XP_021436592.1;XP_021436591.1;XP_021436590.1;XP_021436589.1	XP_021436592.1;XP_021436591.1;XP_021436590.1;XP_021436589.1	XP_021436592.1 dystonin-like isoform X4 [Oncorhynchus mykiss];XP_021436591.1 dystonin-like isoform X3 [Oncorhynchus mykiss];XP_021436590.1 dystonin-like isoform X2 [Oncorhynchus mykiss];XP_021436589.1 dystonin-like isoform X1 [Oncorhynchus mykiss]	0	0	0	0	0	0	0	0	0	0	0	0	0	0	0	0	0	0	0	0	0	0	0	0	0	0	4698400	0	0	0	0	0	0	0	0	0	0	0	0	0	0	0	2745100	6696000	11006000	5622000	6844600
XP_021437612.1;XP_021442610.1	XP_021437612.1;XP_021442610.1	XP_021437612.1 latexin-like [Oncorhynchus mykiss];XP_021442610.1 latexin-like [Oncorhynchus mykiss]	115760000	102600000	93473000	80584000	82559000	77817000	65375000	67177000	64350000	66691000	102720000	90262000	89355000	81874000	76256000	82647000	99496000	84733000	74303000	84880000	111410000	114950000	87009000	92370000	88966000	84509000	74188000	68779000	66773000	68915000	130400000	113650000	114540000	94200000	98671000	103050000	122450000	101470000	120800000	94065000	121400000	103170000	94572000	100460000	89657000	92323000	87324000
XP_021437641.1	XP_021437641.1	XP_021437641.1 complement C1s subcomponent-like [Oncorhynchus mykiss]	271270000	298770000	296950000	254330000	298740000	271100000	298200000	289500000	309080000	293370000	206190000	233350000	249720000	249180000	264960000	276790000	302680000	269500000	282760000	269430000	196580000	229940000	188960000	177330000	206710000	178240000	196910000	210760000	272130000	222780000	236760000	240580000	228620000	211950000	243100000	256910000	189280000	212870000	259250000	224090000	289660000	342030000	320750000	295760000	293570000	289870000	274000000
XP_021437654.1;XP_021459236.1;XP_021459235.1;XP_021427888.1;XP_021427814.1	XP_021437654.1	XP_021437654.1 mannan-binding lectin serine protease 2-like [Oncorhynchus mykiss]	184080000	183960000	182690000	170750000	189680000	171390000	184180000	159210000	185370000	178980000	167460000	160170000	165710000	166330000	172440000	192720000	56997000	191850000	202030000	196200000	190480000	191740000	167230000	146170000	177420000	162030000	183260000	165840000	154280000	133040000	130920000	124090000	130480000	122350000	145420000	154650000	134840000	155030000	133440000	102690000	178060000	174090000	157270000	148340000	175050000	161660000	152200000
XP_021437767.1	XP_021437767.1	XP_021437767.1 LOW QUALITY PROTEIN: uncharacterized protein LOC110503652 [Oncorhynchus mykiss]	19116000	10994000	0	17736000	15005000	11992000	9464600	6019300	5303000	6969700	0	0	0	0	0	0	0	0	0	0	0	0	0	0	0	0	0	0	0	0	22855000	11699000	13918000	16651000	21799000	15865000	19388000	10108000	9040700	9622200	20181000	10964000	18571000	34074000	20302000	22360000	14323000
XP_021443290.1;XP_021443289.1;XP_021443287.1;XP_021437806.1	XP_021443290.1;XP_021443289.1;XP_021443287.1;XP_021437806.1	XP_021443290.1 transgelin-like isoform X2 [Oncorhynchus mykiss];XP_021443289.1 transgelin-like isoform X2 [Oncorhynchus mykiss];XP_021443287.1 transgelin-like isoform X1 [Oncorhynchus mykiss];XP_021437806.1 transgelin-like [Oncorhynchus mykiss]	0	0	0	0	0	0	0	0	0	0	0	0	0	0	0	4258700	0	0	1801500	0	4299900	3749300	2603900	1851000	0	1792900	1568200	1638700	1912100	974170	1642900	1405100	1533700	1826100	0	1512400	1822300	0	1310400	1681800	12374000	1349000	1509400	1618000	1120500	3886400	1467900
XP_021437885.1;XP_021437884.1	XP_021437885.1;XP_021437884.1	XP_021437885.1 creatine kinase M-type-like [Oncorhynchus mykiss];XP_021437884.1 creatine kinase M-type-like [Oncorhynchus mykiss]	5269800	0	0	0	0	0	0	0	0	0	0	7810100	0	0	0	0	0	0	0	0	0	0	0	0	0	0	4264600	0	0	0	0	0	0	0	0	0	0	0	0	2026400	0	0	0	2627300	0	0	0
XP_021437933.1;XP_021437932.1;XP_021437934.1;XP_021437937.1	XP_021437933.1;XP_021437932.1;XP_021437934.1;XP_021437937.1	XP_021437933.1 alpha-2-macroglobulin-like isoform X2 [Oncorhynchus mykiss];XP_021437932.1 alpha-2-macroglobulin-like isoform X1 [Oncorhynchus mykiss];XP_021437934.1 alpha-2-macroglobulin-like isoform X3 [Oncorhynchus mykiss];XP_021437937.1 alpha-2-macroglobulin-like isoform X5 [Oncorhynchus mykiss]	71621000	77784000	79005000	64177000	53676000	47555000	55816000	58237000	49245000	48008000	95171000	120050000	108820000	107820000	112730000	104750000	176290000	116320000	133470000	132950000	64375000	67039000	59882000	55497000	52597000	45332000	58169000	38327000	44734000	30882000	119770000	133890000	138890000	131920000	123630000	141320000	118470000	149750000	122320000	79339000	110410000	91933000	94151000	79553000	88310000	106730000	95520000
XP_021437935.1;XP_021423335.1;XP_021414817.1;XP_021448762.1;XP_021442754.1;XP_021448755.1;XP_021448697.1;XP_021426073.1;XP_021448149.1;XP_021450316.1;XP_021448765.1;XP_021449121.1;XP_021448764.1	XP_021437935.1	XP_021437935.1 alpha-2-macroglobulin-like isoform X4 [Oncorhynchus mykiss]	8535800000	8048900000	8175700000	6935700000	6557700000	6522300000	6673400000	6952100000	6559200000	6788000000	13504000000	13077000000	13173000000	12028000000	11686000000	11251000000	16769000000	13074000000	13894000000	12446000000	14558000000	14237000000	12182000000	10617000000	10257000000	9994000000	11087000000	10004000000	9994100000	8654400000	13268000000	12811000000	12022000000	11359000000	12009000000	13035000000	12465000000	13788000000	13056000000	8997500000	10813000000	9952600000	10037000000	9169400000	8292200000	9101100000	9186300000
XP_021437987.1;XP_021450132.1	XP_021437987.1	XP_021437987.1 alpha-2-macroglobulin-like [Oncorhynchus mykiss]	3667800000	3118200000	3062000000	2677600000	2551300000	2471900000	2439700000	2559100000	2249000000	2363400000	3839200000	3403100000	3119800000	3040400000	2714100000	2601200000	3887300000	2856400000	2641400000	2487200000	3065600000	2808200000	2391500000	2124200000	2044300000	1918100000	2022800000	1878400000	1936400000	1710800000	3089600000	2930000000	2711100000	2628500000	2980900000	3066200000	2640800000	2905200000	2740300000	2137200000	2406200000	2664200000	2375500000	2177900000	2029500000	2175700000	1943200000
XP_021437990.1;XP_021437989.1;XP_021437988.1	XP_021437990.1;XP_021437989.1;XP_021437988.1	XP_021437990.1 alpha-2-macroglobulin-like isoform X3 [Oncorhynchus mykiss];XP_021437989.1 alpha-2-macroglobulin-like isoform X2 [Oncorhynchus mykiss];XP_021437988.1 alpha-2-macroglobulin-like isoform X1 [Oncorhynchus mykiss]	0	0	0	0	0	0	0	0	0	0	0	0	0	0	0	0	0	0	0	0	0	0	0	0	0	0	0	0	0	0	0	0	0	0	0	0	0	0	0	0	0	37576000	38741000	36715000	24120000	42397000	40038000
XP_021438013.1;XP_021438013.1;XP_021438012.1;XP_021438012.1	XP_021438013.1;XP_021438013.1;XP_021438012.1;XP_021438012.1	XP_021438013.1 high affinity immunoglobulin gamma Fc receptor I-like isoform X2 [Oncorhynchus mykiss];XP_021438013.1 high affinity immunoglobulin gamma Fc receptor I-like isoform X2 [Oncorhynchus mykiss];XP_021438012.1 high affinity immunoglobulin gamma Fc receptor I-like isoform X1 [Oncorhynchus mykiss];XP_021438012.1 high affinity immunoglobulin gamma Fc receptor I-like isoform X1 [Oncorhynchus…	0	0	0	0	0	0	0	0	4219400	0	0	5703600	5714300	4895600	0	0	0	0	0	0	0	0	7377200	8517800	23992000	6017000	0	0	0	0	0	0	3762200	4712500	3433800	0	0	0	0	0	0	0	0	0	0	0	0
XP_021438056.1;XP_021438055.1	XP_021438056.1;XP_021438055.1	XP_021438056.1 periostin-like isoform X2 [Oncorhynchus mykiss];XP_021438055.1 periostin-like isoform X1 [Oncorhynchus mykiss]	0	0	0	0	0	0	0	0	0	0	0	0	0	0	0	0	0	0	0	0	0	0	0	0	0	0	0	0	0	0	0	0	0	0	0	0	0	0	0	0	0	0	0	0	0	0	0
XP_021438059.1	XP_021438059.1	XP_021438059.1 complement C4-like [Oncorhynchus mykiss]	38644000	48057000	52675000	39604000	38032000	40037000	35896000	28882000	30543000	32089000	25111000	26147000	24455000	21447000	24652000	33107000	30590000	20895000	26634000	13619000	35647000	48440000	35503000	25456000	31781000	30707000	30091000	32202000	47197000	46056000	40362000	42744000	48454000	33857000	31929000	33899000	26060000	33015000	36375000	26070000	28816000	31232000	27901000	27843000	27940000	28962000	37731000
XP_021438281.1	XP_021438281.1	XP_021438281.1 alpha-2-antiplasmin-like [Oncorhynchus mykiss]	0	0	0	0	0	0	0	0	0	0	0	0	0	0	0	0	0	0	0	0	0	0	0	0	0	0	0	0	0	0	0	0	0	0	0	0	0	0	0	0	0	0	0	0	0	0	0
XP_021438648.1;NP_001117781.1;XP_021417849.1	XP_021438648.1;NP_001117781.1	XP_021438648.1 LECT2 neutrophil chemotactic factor isoform X1 [Oncorhynchus mykiss];NP_001117781.1 LECT2 neutrophil chemotactic factor precursor [Oncorhynchus mykiss]	0	0	0	31615000	82645000	67171000	64412000	36961000	12900000	24327000	0	10337000	27223000	54871000	130110000	49074000	0	20469000	18434000	24425000	0	21494000	9368800	62365000	230060000	134190000	113960000	275550000	209520000	388270000	0	136450000	51479000	44895000	37522000	24898000	8176000	16397000	10866000	39418000	0	55805000	14800000	24923000	34282000	20537000	24071000
XP_021438913.1	XP_021438913.1	XP_021438913.1 glutathione peroxidase 3-like [Oncorhynchus mykiss]	14764000	13744000	13842000	15991000	19244000	18017000	18600000	18563000	13997000	17998000	12741000	0	0	12812000	17059000	10950000	15503000	13872000	14334000	11238000	10368000	7535800	0	11415000	8088300	16235000	17171000	20752000	23318000	30826000	19332000	30852000	25956000	23139000	22743000	19653000	15174000	17842000	18547000	16533000	10650000	26783000	20894000	18730000	20407000	18738000	18802000
XP_021438915.1	XP_021438915.1	XP_021438915.1 transforming growth factor-beta-induced protein ig-h3-like [Oncorhynchus mykiss]	0	0	0	0	0	0	0	0	0	0	0	0	0	0	0	0	0	0	0	0	0	0	0	0	0	0	0	0	0	0	0	0	0	0	0	0	0	0	0	0	0	0	0	0	0	0	0
XP_021439053.1	XP_021439053.1	XP_021439053.1 C4b-binding protein alpha chain-like isoform X1 [Oncorhynchus mykiss]	10617000	8559400	8696200	10032000	9156900	7330300	8060500	9276600	8212000	11080000	9073100	9636900	8716400	9945300	12649000	10133000	12608000	8776600	9938100	11291000	0	0	0	0	0	0	0	0	0	0	0	0	0	0	4357900	0	0	0	4219300	0	0	7197600	6519200	9085000	13177000	11245000	10579000
XP_021439177.1	XP_021439177.1	XP_021439177.1 fibrinogen-like protein 1 [Oncorhynchus mykiss]	0	0	0	0	0	0	0	0	0	0	0	0	0	0	0	0	0	0	0	0	3035100	0	3327900	0	0	0	0	0	0	0	0	0	2641400	0	0	0	2151400	0	0	0	0	0	0	0	0	0	0
XP_021439534.1	XP_021439534.1	XP_021439534.1 coagulation factor IX-like [Oncorhynchus mykiss]	20909000	0	10697000	22807000	28528000	14361000	18964000	15242000	23209000	15759000	39115000	11557000	20022000	13502000	8847400	14902000	0	20320000	23993000	13184000	22570000	34586000	25764000	27786000	26768000	21626000	16112000	18393000	13289000	15929000	22421000	21516000	22054000	21110000	24564000	24459000	17885000	17946000	21837000	20448000	18926000	26164000	23406000	19785000	33691000	17961000	17227000
XP_021439602.1	XP_021439602.1	XP_021439602.1 saxitoxin and tetrodotoxin-binding protein 1-like [Oncorhynchus mykiss]	197480000	189550000	199430000	182520000	152860000	148700000	137470000	142570000	125170000	139190000	166030000	185660000	177510000	128630000	140910000	107840000	168300000	150570000	160270000	121570000	228610000	249920000	232320000	194210000	177330000	156240000	162730000	135630000	132680000	132500000	399620000	388510000	468250000	460870000	373740000	465610000	324590000	446660000	332230000	236030000	220530000	200730000	250090000	248760000	218710000	217910000	210050000
XP_021440288.1	XP_021440288.1	XP_021440288.1 glutaminyl-peptide cyclotransferase-like [Oncorhynchus mykiss]	0	0	0	0	0	0	0	0	0	0	0	0	0	0	0	0	0	0	0	0	0	2483800	0	3378400	3408300	4853200	2454700	4637600	3574000	5386400	0	3194600	0	0	0	0	1981300	2283000	5229200	4671900	0	0	0	0	0	0	0
XP_021440444.1;XP_021440443.1	XP_021440444.1;XP_021440443.1	XP_021440444.1 fibrous sheath-interacting protein 1 isoform X2 [Oncorhynchus mykiss];XP_021440443.1 fibrous sheath-interacting protein 1 isoform X1 [Oncorhynchus mykiss]	0	0	0	0	0	0	0	0	0	0	0	0	0	0	0	0	0	0	0	0	0	0	0	0	0	0	0	0	0	0	0	0	0	0	0	0	0	0	0	0	0	0	0	0	0	0	0
XP_021440586.1	XP_021440586.1	XP_021440586.1 protein Z-dependent protease inhibitor-like [Oncorhynchus mykiss]	409140000	361040000	337220000	329050000	343340000	349340000	329120000	348000000	325500000	331350000	416840000	419220000	379720000	410290000	362980000	362320000	68270000	416960000	400990000	390500000	344000000	325230000	290300000	269960000	285590000	284660000	304210000	356130000	384010000	397380000	436880000	381540000	385900000	366580000	425690000	395310000	405920000	441450000	362350000	369750000	327220000	349660000	331240000	305070000	318770000	312770000	312750000
XP_021440666.1	XP_021440666.1	XP_021440666.1 uncharacterized protein LOC110505637 isoform X1 [Oncorhynchus mykiss]	645690000	577630000	564130000	499870000	512110000	474920000	443770000	496680000	497680000	545000000	1407700000	1406800000	1299100000	1265300000	1056600000	872850000	1386100000	1077500000	1213200000	1034200000	1384800000	1335300000	1164100000	1019300000	1051700000	852750000	808910000	776300000	1048000000	810060000	1244400000	1144500000	1101000000	1045700000	1118700000	1141100000	1043300000	1240600000	1109400000	844860000	1056500000	939420000	871990000	843180000	1006600000	905200000	855370000
XP_021440676.1	XP_021440676.1	XP_021440676.1 uncharacterized protein LOC110505637 isoform X2 [Oncorhynchus mykiss]	0	20243000	0	15498000	15290000	11799000	10088000	14416000	13044000	15645000	81417000	106530000	102950000	102710000	93866000	78321000	97491000	74439000	86466000	68557000	126110000	156960000	142480000	117190000	120030000	82463000	99312000	74659000	100900000	83620000	88528000	90477000	80992000	86804000	81457000	78288000	58010000	80173000	71402000	55574000	117330000	108100000	105040000	107770000	105020000	105450000	93769000
XP_021440760.1	XP_021440760.1	XP_021440760.1 apolipoprotein B-100 [Oncorhynchus mykiss]	629680000	579390000	525490000	461020000	530940000	448050000	459130000	574310000	659000000	584180000	867480000	735290000	616070000	589570000	580160000	519760000	650950000	778140000	861110000	728030000	440690000	450850000	597190000	404720000	601140000	340750000	363070000	351610000	442660000	403310000	724500000	601170000	770370000	795930000	599250000	660980000	597060000	759200000	865160000	947050000	693000000	519070000	431280000	474370000	1139100000	458550000	578060000
XP_021441170.1;NP_001158583.1	XP_021441170.1;NP_001158583.1	XP_021441170.1 high choriolytic enzyme 1 isoform X1 [Oncorhynchus mykiss];NP_001158583.1 high choriolytic enzyme 1 precursor [Oncorhynchus mykiss]	0	0	0	7455700	15414000	11414000	14568000	40650000	41099000	40068000	0	0	11417000	19104000	16159000	26580000	26421000	27019000	30513000	28256000	0	0	4649400	7565300	20028000	23928000	20160000	28090000	41961000	38617000	0	13114000	13005000	16303000	13954000	16370000	12666000	24504000	25280000	18287000	0	4968800	6240800	6731200	8985900	7464000	11742000
XP_021441299.1;XP_021441232.1	XP_021441299.1;XP_021441232.1	XP_021441299.1 phospholipid hydroperoxide glutathione peroxidase, mitochondrial-like isoform X2 [Oncorhynchus mykiss];XP_021441232.1 phospholipid hydroperoxide glutathione peroxidase, mitochondrial-like isoform X1 [Oncorhynchus mykiss]	135610000	85752000	91425000	106730000	126200000	115590000	118830000	124110000	92066000	114520000	110250000	128940000	89902000	118090000	102600000	110220000	167170000	117160000	98560000	113310000	148400000	115580000	142590000	141250000	128690000	145940000	143040000	95797000	99525000	77279000	125900000	88342000	86343000	107650000	149040000	157000000	142460000	116850000	92807000	141270000	100780000	98923000	108660000	111090000	123120000	123340000	118320000
XP_021453798.1;XP_021441252.1	XP_021453798.1;XP_021441252.1	XP_021453798.1 tumor necrosis factor receptor superfamily member 11B-like [Oncorhynchus mykiss];XP_021441252.1 tumor necrosis factor receptor superfamily member 11B-like [Oncorhynchus mykiss]	0	0	0	0	0	0	0	0	0	0	0	0	0	0	0	0	0	0	0	0	0	0	0	0	0	0	0	0	0	0	0	0	0	0	0	0	0	0	0	0	0	0	0	0	0	0	1763800
XP_021462771.1;XP_021441585.1	XP_021462771.1;XP_021441585.1	XP_021462771.1 cadherin-11-like [Oncorhynchus mykiss];XP_021441585.1 cadherin-11-like [Oncorhynchus mykiss]	5176000	0	3942800	3326900	0	3113600	2828700	0	0	0	0	0	0	3588100	0	2668300	0	0	3111000	0	4945000	4976200	4437200	3881000	3526700	3329300	2816200	0	0	0	4934300	3128500	3203700	3540500	5472100	6571000	4117600	5051800	4722100	3288200	0	4058600	3511000	3291500	3827000	3081700	2969100
XP_021441668.1	XP_021441668.1	XP_021441668.1 B-cadherin-like [Oncorhynchus mykiss]	0	0	0	0	0	0	0	0	0	0	0	0	0	0	0	0	0	0	0	0	0	0	0	0	0	0	0	0	0	0	0	0	0	0	0	0	0	0	0	0	0	0	0	0	0	0	0
XP_021441699.1;XP_021441698.1;XP_021441697.1	XP_021441699.1;XP_021441698.1;XP_021441697.1	XP_021441699.1 haptoglobin-like isoform X3 [Oncorhynchus mykiss];XP_021441698.1 haptoglobin-like isoform X2 [Oncorhynchus mykiss];XP_021441697.1 haptoglobin-like isoform X1 [Oncorhynchus mykiss]	113020000	183910000	220880000	244160000	407780000	273660000	285610000	243640000	148390000	237070000	65906000	203780000	247130000	305370000	475660000	239950000	225090000	140920000	143640000	188080000	44275000	185990000	66716000	211720000	225320000	271810000	180800000	487590000	415040000	647090000	53357000	392370000	47102000	81982000	62396000	54566000	24058000	66687000	77967000	185450000	55865000	390270000	136030000	154500000	172620000	164430000	174840000
XP_021462961.1;XP_021441814.1;XP_021441813.1	XP_021462961.1;XP_021441814.1;XP_021441813.1	XP_021462961.1 lymphatic vessel endothelial hyaluronic acid receptor 1-like [Oncorhynchus mykiss];XP_021441814.1 lymphatic vessel endothelial hyaluronic acid receptor 1-like [Oncorhynchus mykiss];P_021441813.1 lymphatic vessel endothelial hyaluronic acid receptor 1-like [Oncorhynchus mykiss]	0	0	0	0	0	0	0	0	0	0	0	0	0	0	0	0	0	0	0	0	0	0	0	0	0	0	0	0	0	0	0	0	0	0	0	0	0	0	0	0	0	0	0	0	0	0	0
XP_021442137.1	XP_021442137.1	XP_021442137.1 complement C4-like, partial [Oncorhynchus mykiss]	278020000	342410000	400460000	399570000	434410000	379110000	356740000	351660000	302000000	277660000	339220000	408460000	459060000	458550000	523650000	465990000	500220000	423460000	415170000	331870000	155020000	183590000	162360000	178780000	197410000	129930000	129880000	126750000	159430000	119840000	255600000	250210000	326840000	263120000	308460000	334590000	236400000	247720000	192100000	168630000	295630000	335220000	334850000	319930000	339260000	303090000	216420000
XP_021463362.1;XP_021442221.1	XP_021463362.1;XP_021442221.1	XP_021463362.1 glucose-6-phosphate isomerase-like [Oncorhynchus mykiss];XP_021442221.1 glucose-6-phosphate isomerase-like [Oncorhynchus mykiss]	13374000	13336000	12673000	18166000	9493600	6897500	8536600	0	5217900	0	10565000	30307000	13362000	11615000	6792700	4979700	5422000	0	0	8371600	6214100	4881900	7739800	5634000	4538200	0	9766900	8017200	11623000	6116600	0	0	0	8103400	0	0	0	3083100	0	7135900	8404500	5047400	0	6101600	8493400	0	9645000
XP_021463412.1;XP_021463411.1;XP_021442275.1	XP_021463412.1;XP_021463411.1;XP_021442275.1	XP_021463412.1 dipeptidase 2-like isoform X2 [Oncorhynchus mykiss];XP_021463411.1 dipeptidase 2-like isoform X1 [Oncorhynchus mykiss];XP_021442275.1 dipeptidase 2-like [Oncorhynchus mykiss]	0	0	0	0	0	0	0	0	0	0	0	0	0	0	0	0	0	0	0	0	0	0	0	0	0	0	0	0	0	0	0	0	0	0	0	0	0	0	0	0	0	0	0	2503500	0	0	0
XP_021442335.1;XP_021442333.1	XP_021442335.1;XP_021442333.1	XP_021442335.1 fibrillin-1-like [Oncorhynchus mykiss];XP_021442333.1 fibrillin-1-like [Oncorhynchus mykiss]	0	0	0	0	0	0	0	0	0	0	0	0	0	0	0	0	0	0	0	0	0	0	0	0	0	0	0	0	0	0	0	0	0	0	0	0	0	0	0	0	0	0	0	0	3747600	0	0
XP_021442581.1;XP_021453834.1;XP_021442565.1	XP_021442581.1;XP_021453834.1;XP_021442565.1	XP_021442581.1 ectonucleotide pyrophosphatase/phosphodiesterase family member 2-like [Oncorhynchus mykiss];XP_021453834.1 ectonucleotide pyrophosphatase/phosphodiesterase family member 2-like [Oncorhynchus mykiss];XP_021442565.1 ectonucleotide pyrophosphatase/phosphodiesterase family member 2-like [Oncorhynchus mykiss]	0	0	0	0	0	0	0	0	0	0	0	0	0	0	0	0	0	0	0	0	5595200	5945600	4887900	4352200	4011300	4058600	4010500	5113400	5449300	5097300	8995900	5906700	6362200	6431000	7673200	7488100	7259400	6479000	7214500	4141900	7117600	6586100	6781800	5946900	5120000	6168800	5467500
XP_021442708.1;XP_021442707.1;XP_021437938.1	XP_021442708.1;XP_021442707.1	XP_021442708.1 alpha-2-macroglobulin-like isoform X2 [Oncorhynchus mykiss];	8383500000	7610900000	7584400000	6314600000	5625300000	5846400000	6344600000	6696600000	6410300000	6157400000	10864000000	10652000000	9332400000	9246200000	8299200000	8131500000	12919000000	8783300000	8983600000	8379600000	8484400000	8333300000	7165500000	6626000000	5875400000	6251400000	6962700000	6563400000	6922900000	6521200000	8616300000	8068000000	7467300000	6899600000	7776300000	8208300000	6983800000	7679400000	7805300000	5824700000	8927500000	8707300000	8234800000	7611300000	7169200000	7865100000	7810600000
XP_021442709.1	XP_021442709.1	XP_021442709.1 alpha-2-macroglobulin-like [Oncorhynchus mykiss]	120770000	164050000	167710000	171180000	177880000	208930000	212630000	192950000	170650000	169340000	181200000	223830000	252600000	261490000	294450000	308280000	404900000	252550000	228020000	208910000	119590000	145850000	123600000	125340000	135630000	171600000	182140000	252340000	330840000	348830000	138620000	185850000	175340000	158760000	171520000	165130000	133130000	141140000	152660000	150000000	162490000	252220000	248800000	232050000	235230000	226000000	215380000
XP_021442907.1;XP_021442906.1	XP_021442907.1;XP_021442906.1	XP_021442907.1 coagulation factor IX-like isoform X2 [Oncorhynchus mykiss];XP_021442906.1 coagulation factor IX-like isoform X1 [Oncorhynchus mykiss]	30289000	13835000	13074000	35491000	46110000	17763000	26514000	26255000	33439000	25044000	57363000	19786000	31501000	27176000	17780000	30398000	0	32131000	53077000	28918000	36889000	42022000	42073000	37195000	43112000	32918000	28821000	31506000	30750000	24708000	32980000	31609000	36034000	35381000	43292000	40483000	32405000	44175000	31777000	31738000	23194000	26741000	19374000	20952000	31411000	22260000	20006000
XP_021443148.1	XP_021443148.1	XP_021443148.1 flavin reductase (NADPH)-like [Oncorhynchus mykiss]	0	0	0	0	0	0	0	0	0	0	5881800	0	0	0	0	0	0	0	0	0	0	0	0	0	0	0	0	0	0	0	0	0	0	0	0	0	0	0	0	0	19559000	0	0	0	0	0	0
XP_021443198.1	XP_021443198.1	XP_021443198.1 delta-like protein C [Oncorhynchus mykiss]	0	0	0	0	0	0	0	0	0	0	0	0	0	0	0	0	0	0	0	0	0	0	0	0	0	0	0	0	0	0	0	0	0	0	0	0	0	0	0	0	0	0	0	0	0	0	0
XP_021443252.1;XP_021443251.1;XP_021437773.1;XP_021437772.1	XP_021443252.1;XP_021443251.1;XP_021437773.1;XP_021437772.1	XP_021443252.1 bleomycin hydrolase isoform X2 [Oncorhynchus mykiss];XP_021443251.1 bleomycin hydrolase isoform X1 [Oncorhynchus mykiss];XP_021437773.1 bleomycin hydrolase-like isoform X2 [Oncorhynchus mykiss];XP_021437772.1 bleomycin hydrolase-like isoform X1 [Oncorhynchus mykiss]	0	0	0	0	0	0	0	0	0	0	0	0	0	0	0	0	0	0	0	0	0	0	0	0	0	0	0	0	0	0	0	0	0	0	0	0	0	0	0	0	0	0	0	0	0	0	0
XP_021443335.1;XP_021437359.1	XP_021443335.1;XP_021437359.1	XP_021443335.1 thymus-specific serine protease-like [Oncorhynchus mykiss];XP_021437359.1 thymus-specific serine protease [Oncorhynchus mykiss]	0	0	0	0	0	0	0	0	0	0	0	0	0	0	0	0	0	0	0	0	0	0	0	2700100	0	0	0	0	0	0	0	0	0	0	0	0	0	0	0	0	43891000	0	0	0	0	0	0
XP_021443373.1	XP_021443373.1	XP_021443373.1 creatine kinase M-type-like [Oncorhynchus mykiss]	51102000	37752000	50944000	55756000	23045000	11306000	22687000	9985800	6503700	13395000	60206000	84534000	22725000	20030000	20694000	12411000	0	0	0	36486000	24017000	22834000	11170000	13259000	18991000	8848600	45471000	12652000	10379000	19209000	4834500	10781000	7116700	40346000	9063000	6760800	7687700	0	0	17887000	44848000	12393000	6974100	13494000	21705000	6782800	32173000
XP_021443425.1;XP_021443425.1	XP_021443425.1;XP_021443425.1	XP_021443425.1 high affinity immunoglobulin gamma Fc receptor I-like [Oncorhynchus mykiss];XP_021443425.1 high affinity immunoglobulin gamma Fc receptor I-like [Oncorhynchus mykiss]	6709100	5846300	6847000	8213900	6187100	4217500	8254000	5890900	4969900	5021000	8871000	10675000	9798200	15730000	8672800	9055200	12568000	7231400	8184100	0	8622500	6880800	17338000	30034000	38766000	13336000	7791600	9090700	9589900	12293000	6367900	6387300	6082900	9301300	9148900	7073000	4438900	8029800	15878000	21879000	8593700	10075000	8953400	9366200	23412000	9783800	11060000
XP_021443470.1	XP_021443470.1	XP_021443470.1 periostin-like [Oncorhynchus mykiss]	14659000	13483000	12857000	18449000	14398000	14228000	9230300	6985400	6141500	7315100	5160200	8443200	3471600	6807500	5085400	6826800	1956500	8234600	8276300	7012700	15144000	6195200	7330400	5663300	7412000	5746600	6017000	5257000	3969400	5322700	15849000	9372200	8761700	14066000	17764000	17110000	14301000	9090100	7912200	10176000	13233000	7360000	7070200	5852200	9207600	5708600	5478700
XP_021443472.1	XP_021443472.1	XP_021443472.1 complement C4-B-like [Oncorhynchus mykiss]	466590000	504430000	562510000	537370000	557650000	561980000	444370000	425940000	487330000	486430000	403200000	423020000	469490000	427590000	527000000	529780000	657330000	464000000	498580000	443570000	286170000	334570000	303990000	274240000	354650000	246290000	230070000	253360000	362920000	358900000	413310000	439440000	493990000	473680000	450080000	424540000	325840000	405590000	393450000	329620000	447180000	427670000	432110000	422330000	473360000	441100000	408980000
XP_021443502.1	XP_021443502.1	XP_021443502.1 vitronectin-like [Oncorhynchus mykiss]	74322000	62438000	55048000	48019000	48384000	52962000	57785000	63565000	52160000	56641000	71167000	69534000	55238000	54984000	55289000	55413000	94384000	65630000	61885000	60890000	82224000	83978000	64876000	60490000	52632000	54863000	58490000	61321000	65283000	62004000	67190000	66727000	57352000	65688000	84161000	71547000	60828000	72968000	75977000	70557000	65226000	77931000	63061000	57473000	73499000	58533000	60667000
XP_021443756.1;XP_021443755.1;XP_021443754.1	XP_021443756.1;XP_021443755.1;XP_021443754.1	XP_021443756.1 CD166 antigen homolog isoform X3 [Oncorhynchus mykiss];XP_021443755.1 CD166 antigen homolog A-like isoform X2 [Oncorhynchus mykiss];XP_021443754.1 CD166 antigen homolog A-like isoform X1 [Oncorhynchus mykiss]	0	0	0	0	0	0	0	0	0	0	0	0	0	0	0	0	0	0	0	0	0	0	0	0	0	0	0	0	0	0	0	0	0	0	0	0	0	0	0	0	0	0	0	0	0	0	0
XP_021444018.1	XP_021444018.1	XP_021444018.1 putative serine protease K12H4.7 [Oncorhynchus mykiss]	0	0	0	0	0	0	0	0	0	0	0	0	0	0	0	0	0	0	0	0	0	0	0	0	0	0	0	0	0	0	0	0	0	0	0	0	0	3733200	0	0	0	0	0	0	0	0	0
XP_021444253.1	XP_021444253.1	XP_021444253.1 transferrin isoform X1 [Oncorhynchus mykiss]	0	0	0	0	0	8981700	0	0	0	9055900	689580000	731930000	798910000	874990000	830190000	667080000	1134600000	794180000	415500000	370680000	139500000	144990000	127810000	28883000	132600000	95759000	113840000	120220000	0	0	33117000	0	15515000	25588000	35021000	36764000	0	90248000	134300000	38460000	541160000	632940000	554320000	582230000	649720000	684730000	580280000
XP_021444338.1;XP_021445696.1	XP_021444338.1	XP_021444338.1 vascular cell adhesion protein 1-like [Oncorhynchus mykiss]	5268600	5527700	0	0	0	0	0	3990100	0	4697700	0	0	0	0	0	0	0	0	0	0	0	0	0	0	0	0	0	0	0	0	4192700	0	4358000	0	5441700	6217700	3200100	0	0	0	5251900	4013300	0	0	4871500	4177000	3932400
XP_021469641.1;XP_021469639.1;XP_021469638.1;XP_021469637.1;XP_021469636.1;XP_021444542.1;XP_021444541.1;XP_021444540.1;XP_021444539.1	XP_021469641.1;XP_021469639.1;XP_021469638.1;XP_021469637.1;XP_021469636.1;XP_021444542.1;XP_021444541.1;XP_021444540.1;XP_021444539.1	XP_021469641.1 cold-inducible RNA-binding protein B-like isoform X3 [Oncorhynchus mykiss];XP_021469639.1 cold-inducible RNA-binding protein B-like isoform X2 [Oncorhynchus mykiss];XP_021469638.1 cold-inducible RNA-binding protein B-like isoform X2 [Oncorhynchus mykiss];XP_021469637.1 cold-inducible RNA-binding protein B-like isoform X1 [Oncorhynchus mykiss];XP_021469636.1 cold-inducible RNA-bindi…	0	0	0	0	0	0	0	0	0	0	620220	0	0	0	0	816020	0	0	0	0	0	0	0	0	0	0	0	0	0	0	0	0	0	0	0	0	0	0	0	0	4529900	614130	0	0	0	0	0
XP_021444903.1	XP_021444903.1	XP_021444903.1 NADH dehydrogenase [ubiquinone] flavoprotein 1, mitochondrial-like [Oncorhynchus mykiss]	3607000000	2132100000	2276600000	2652800000	2692100000	2167300000	2835400000	1940700000	2056600000	1888200000	3183200000	2633400000	2492300000	2733200000	2392500000	2421400000	878070000	1743800000	2564600000	2845800000	1679700000	1726900000	2172300000	1485100000	1976400000	1657900000	1747400000	2167800000	1416200000	1280100000	1488600000	1112300000	1240600000	1744600000	1967700000	1116200000	1814600000	881220000	1546900000	514350000	0	1832500000	1989200000	486540000	1039800000	1992100000	3228400000
XP_021469158.1;XP_021469157.1;XP_021444972.1	XP_021469158.1;XP_021469157.1;XP_021444972.1	XP_021469158.1 tubulin beta chain-like isoform X2 [Oncorhynchus mykiss];XP_021469157.1 tubulin beta-2A chain-like isoform X1 [Oncorhynchus mykiss];XP_021444972.1 tubulin beta-2A chain-like [Oncorhynchus mykiss]	0	0	0	0	0	0	0	0	0	0	0	0	0	0	0	0	0	0	0	0	0	0	0	0	0	0	0	0	0	0	0	0	0	0	0	0	0	0	0	0	0	0	0	0	0	0	0
XP_021445586.1	XP_021445586.1	XP_021445586.1 carboxypeptidase N subunit 2-like [Oncorhynchus mykiss]	73040000	69518000	78172000	68325000	69387000	67291000	68369000	73586000	79839000	77921000	67705000	90914000	77665000	81384000	92147000	92074000	41957000	95956000	87404000	82940000	55422000	62052000	53571000	48540000	58589000	56639000	57854000	63781000	66203000	64461000	80813000	73973000	95743000	78757000	78076000	85083000	74307000	86714000	64797000	54668000	51863000	58012000	54549000	53696000	52598000	61914000	57672000
XP_021445619.1	XP_021445619.1	XP_021445619.1 alpha-2-HS-glycoprotein [Oncorhynchus mykiss]	6183000000	4609200000	4664100000	5387400000	5597800000	4096800000	4414500000	4665300000	5173500000	4369400000	5316600000	4007700000	3941900000	3763000000	2794700000	3011800000	1189600000	3863900000	5207000000	4333500000	7823500000	6627100000	6229100000	5572600000	4920100000	4970500000	4502300000	3965900000	3645900000	2767400000	6332900000	5011100000	4746800000	4228400000	4855100000	4667100000	5154700000	4927200000	5421000000	3781600000	5511900000	5751800000	5437100000	5242300000	4478400000	5268800000	5190600000
XP_021445625.1;XP_021445629.1;XP_021445627.1;XP_021445626.1;XP_021445624.1	XP_021445625.1;XP_021445629.1;XP_021445627.1;XP_021445626.1;XP_021445624.1	XP_021445625.1 complement factor H-like isoform X2 [Oncorhynchus mykiss];XP_021445629.1 complement factor H-like isoform X5 [Oncorhynchus mykiss];XP_021445627.1 complement factor H-like isoform X4 [Oncorhynchus mykiss];XP_021445626.1 complement factor H-like isoform X3 [Oncorhynchus mykiss];XP_021445624.1 complement factor H-like isoform X1 [Oncorhynchus mykiss]	820870000	1080600000	1162000000	1276500000	1414700000	1432600000	1547800000	1543000000	1261100000	1393000000	704520000	1051500000	1062000000	1188600000	1404300000	1272800000	1872100000	1106300000	930270000	891500000	1005100000	1241600000	1183500000	1337100000	1626400000	1549400000	1778200000	1923600000	1880400000	1834200000	1032100000	1348000000	1244300000	1078000000	1132600000	1187300000	1116700000	1158400000	1035700000	1096900000	722740000	1405500000	1389300000	1298100000	1175100000	1408200000	1283900000
XP_021445630.1	XP_021445630.1	XP_021445630.1 coagulation factor XIII B chain-like [Oncorhynchus mykiss]	55531000	73078000	55429000	68238000	70556000	95547000	71988000	81008000	66802000	68566000	0	44588000	42095000	44027000	46285000	44027000	64233000	35040000	37757000	33588000	35064000	39100000	34694000	41014000	34621000	71822000	57149000	52334000	39852000	57509000	45415000	46950000	66146000	45840000	42747000	39244000	82299000	44114000	30271000	37791000	15320000	30952000	55840000	45068000	17667000	32403000	31796000
XP_021445633.1;XP_021445632.1;XP_021445631.1	XP_021445633.1;XP_021445632.1;XP_021445631.1	XP_021445633.1 coagulation factor XIII B chain-like isoform X2 [Oncorhynchus mykiss];XP_021445632.1 coagulation factor XIII B chain-like isoform X2 [Oncorhynchus mykiss];XP_021445631.1 coagulation factor XIII B chain-like isoform X1 [Oncorhynchus mykiss]	0	0	0	0	0	0	0	0	0	0	0	0	0	0	0	0	0	0	0	0	0	0	0	0	0	10440000	9447600	6922600	0	0	8752300	9774100	15784000	10871000	9668700	0	0	0	0	0	0	0	7642000	8910100	0	0	0
XP_021445727.1;XP_021445725.1;XP_021445724.1	XP_021445727.1;XP_021445725.1;XP_021445724.1	XP_021445727.1 transferrin receptor protein 1-like [Oncorhynchus mykiss];XP_021445725.1 transferrin receptor protein 1-like [Oncorhynchus mykiss];XP_021445724.1 transferrin receptor protein 1-like [Oncorhynchus mykiss]	20632000	10844000	10418000	7981900	8935600	9742700	16780000	17724000	10799000	13756000	23088000	10473000	11867000	9482900	10460000	10598000	13327000	18303000	20269000	15213000	13451000	9301000	7026600	7172500	8235300	7930900	11300000	10624000	9582200	9586000	9686300	0	0	0	7477000	7904400	10704000	17455000	10168000	7630400	22396000	7587000	7021100	7095000	10486000	11180000	12628000
XP_021445743.1;XP_021445744.1	XP_021445743.1;XP_021445744.1	XP_021445743.1 uncharacterized protein LOC110509104 isoform X1 [Oncorhynchus mykiss];XP_021445744.1 uncharacterized protein LOC110509104 isoform X2 [Oncorhynchus mykiss]	25930000	32275000	24272000	27894000	22200000	39475000	31824000	36384000	27417000	29969000	53278000	47125000	54044000	35116000	42146000	69122000	66542000	50182000	41193000	41491000	26362000	27906000	23405000	20974000	21478000	31630000	27771000	30553000	33233000	32836000	20881000	21349000	33271000	26065000	32337000	27994000	18748000	24678000	21761000	27245000	31653000	41347000	34903000	25313000	26051000	22799000	23937000
XP_021445773.1	XP_021445773.1	XP_021445773.1 pancreatic alpha-amylase-like [Oncorhynchus mykiss]	52685000	55548000	51745000	54889000	48083000	55634000	50939000	46023000	39388000	48524000	28578000	29743000	24390000	28716000	20418000	22377000	32778000	18407000	19374000	17142000	37868000	40633000	34871000	34986000	36525000	32371000	34114000	37792000	46205000	46594000	24042000	23901000	29873000	27529000	26043000	26269000	18339000	23718000	16207000	22383000	23771000	33922000	26679000	29486000	24205000	21291000	20148000
XP_021445885.1;XP_021445884.1	XP_021445885.1;XP_021445884.1	XP_021445885.1 complement factor B isoform X2 [Oncorhynchus mykiss];XP_021445884.1 complement factor B isoform X1 [Oncorhynchus mykiss]	564760000	647790000	594170000	540990000	609290000	583590000	656360000	585970000	466490000	502720000	435300000	537130000	470820000	499920000	572270000	517300000	533250000	462780000	412470000	479750000	392830000	555280000	403510000	514220000	481500000	433820000	528930000	643770000	574810000	563310000	658050000	751330000	550330000	590060000	626600000	697570000	579670000	607440000	600620000	635720000	441280000	757270000	598670000	553950000	625890000	550580000	519470000
XP_021457811.1;XP_021446355.1	XP_021457811.1;XP_021446355.1	XP_021457811.1 betaine--homocysteine S-methyltransferase 1-like [Oncorhynchus mykiss];XP_021446355.1 betaine--homocysteine S-methyltransferase 1 [Oncorhynchus mykiss]	0	0	0	0	0	0	0	0	0	0	0	0	0	0	0	0	0	0	0	0	0	0	0	0	0	0	0	0	0	0	0	0	0	0	0	0	0	2810100	0	0	0	0	0	0	0	0	0
XP_021446506.1	XP_021446506.1	XP_021446506.1 phosphoglycerate mutase 2-like [Oncorhynchus mykiss]	40456000	34732000	26173000	25232000	17160000	10360000	17957000	0	8294200	7671700	40534000	50624000	34396000	26552000	15246000	12371000	6633700	6524800	0	27109000	27498000	20472000	13024000	10250000	15838000	11138000	34139000	16850000	20615000	20571000	0	10725000	5423800	31382000	7167800	5289500	8324000	7845400	5288500	12861000	28284000	10180000	7632900	10107000	18993000	8285700	26233000
XP_021458139.1;XP_021446620.1	XP_021458139.1;XP_021446620.1	XP_021458139.1 adenylate kinase isoenzyme 1-like [Oncorhynchus mykiss];XP_021446620.1 adenylate kinase isoenzyme 1 [Oncorhynchus mykiss]	0	6668900	0	0	0	0	0	0	0	0	18807000	0	0	0	0	0	0	0	0	0	8808700	5912900	0	0	0	0	18501000	0	0	0	0	0	0	18758000	0	0	0	0	0	0	17546000	0	0	0	0	0	6811700
XP_021446868.1;XP_021474236.1;XP_021439585.1;XP_021416835.1;XP_021416832.1;XP_021416831.1;XP_021440892.1;XP_021429636.1	XP_021446868.1;XP_021474236.1	XP_021446868.1 cofilin-2-like [Oncorhynchus mykiss];XP_021474236.1 cofilin-2-like [Oncorhynchus mykiss]	0	0	0	0	2746700	7777400	0	0	6055400	4715700	0	0	0	0	0	0	0	0	0	0	3444100	0	5296400	4371900	4398900	3709500	4495000	7707000	6354700	9086800	4756900	5248700	6117400	6369700	5146900	5579900	4505800	6270900	6948900	9818800	23161000	3917400	3984500	5353300	4099000	7684300	5042100
XP_021447067.1	XP_021447067.1	XP_021447067.1 lipocalin-like [Oncorhynchus mykiss]	61942000	55242000	52658000	49092000	38026000	57879000	54259000	51365000	37514000	40118000	38582000	42248000	43754000	29018000	32470000	37573000	63733000	34271000	42063000	36915000	56237000	83589000	65497000	48544000	45787000	46511000	51410000	57692000	58237000	54604000	63484000	64713000	51486000	51282000	66221000	61486000	58102000	56641000	64907000	53728000	57434000	63853000	51902000	51834000	50302000	55348000	49500000
XP_021447138.1;XP_021441110.1;XP_021430565.1	XP_021447138.1	XP_021447138.1 glycogen phosphorylase, muscle form-like [Oncorhynchus mykiss]	0	0	0	0	0	0	0	0	0	0	0	0	0	0	0	0	0	0	0	0	2449200	2020200	0	0	0	0	8748400	0	0	0	0	0	0	2816900	0	0	0	0	0	0	2846200	0	0	0	0	0	1641700
XP_021447163.1	XP_021447163.1	XP_021447163.1 trypsin-2-like [Oncorhynchus mykiss]	0	0	0	0	0	0	0	0	0	0	0	0	0	0	0	0	0	0	0	0	0	0	0	0	0	0	0	0	0	0	0	0	0	0	0	0	1089000	0	0	0	0	0	1794400	2254100	0	2153500	1478800
XP_021447240.1	XP_021447240.1	XP_021447240.1 apolipoprotein A-I-like [Oncorhynchus mykiss]	541310000	520190000	708460000	760290000	632750000	1032600000	754460000	495280000	582740000	579740000	838020000	499880000	939130000	1055000000	816110000	958330000	8711100	721470000	723120000	974640000	1261100000	1077500000	1303700000	1427200000	1085700000	1580400000	872010000	426700000	472320000	643710000	1442000000	1068800000	877580000	1187600000	1445500000	1354500000	1067800000	637530000	705920000	960510000	708500000	607660000	569440000	684850000	687090000	552410000	517140000
XP_021447252.1	XP_021447252.1	XP_021447252.1 apolipoprotein A-IV-like [Oncorhynchus mykiss]	0	0	12761000	13128000	12521000	14584000	15697000	6724300	12264000	9519600	0	0	20466000	25679000	0	18652000	0	0	0	13644000	19424000	14219000	18733000	23382000	18068000	40837000	14191000	6396000	8293900	10126000	18945000	10528000	7630700	13495000	16832000	19559000	19681000	0	0	20110000	12133000	0	15220000	15681000	12581000	11796000	0
XP_021447265.1	XP_021447265.1	XP_021447265.1 apolipoprotein C-I-like [Oncorhynchus mykiss]	448090000	603040000	544550000	513550000	438300000	792580000	751960000	683480000	1361000000	728590000	449380000	564130000	489710000	482960000	579130000	554050000	10228000	743600000	1286400000	914480000	987080000	908010000	841370000	651910000	554180000	961160000	1025900000	895440000	835670000	894210000	1035700000	1036500000	981560000	822590000	834040000	971460000	1332800000	923660000	1323200000	1055300000	914450000	710220000	898340000	836480000	794760000	960450000	1170400000
XP_021447328.1;XP_021475437.1;XP_021452042.1	XP_021447328.1	XP_021447328.1 periostin [Oncorhynchus mykiss]	60257000	46473000	32109000	35089000	22105000	37174000	23717000	32927000	28738000	24000000	32910000	17292000	21801000	18229000	15955000	17984000	30327000	16406000	31868000	23925000	44537000	40861000	44599000	36808000	21011000	21379000	9117900	10364000	6486600	0	42386000	30134000	28847000	33238000	32821000	41375000	42686000	35546000	22790000	21619000	72478000	45931000	52013000	36317000	46379000	26530000	23201000
XP_021447383.1	XP_021447383.1	XP_021447383.1 complement C1q subcomponent subunit C-like, partial [Oncorhynchus mykiss]	324760000	295240000	282200000	278620000	281990000	259370000	287890000	276490000	252510000	283130000	315500000	288500000	279040000	262020000	261090000	315420000	348750000	300800000	329950000	300840000	298720000	291560000	233470000	201470000	257010000	256420000	261250000	252540000	253230000	200920000	232140000	223660000	192390000	200540000	256930000	241060000	197560000	228350000	247440000	194760000	194130000	267050000	232240000	253960000	257200000	256490000	227820000
XP_021447385.1	XP_021447385.1	XP_021447385.1 complement C1q subcomponent subunit A-like [Oncorhynchus mykiss]	62288000	56190000	57116000	55082000	65829000	67662000	62335000	70260000	65450000	71767000	62833000	77558000	64571000	58928000	78580000	67915000	86507000	70685000	77669000	70535000	73494000	76721000	59097000	46974000	56019000	61549000	55582000	60969000	47480000	49397000	62120000	59875000	48635000	61444000	60493000	77511000	72575000	71055000	62886000	47045000	51253000	63929000	46277000	55935000	59806000	57566000	53544000
XP_021447387.1	XP_021447387.1	XP_021447387.1 complement C1q subcomponent subunit B-like [Oncorhynchus mykiss]	160160000	138440000	141250000	147790000	140350000	145000000	139560000	159980000	150630000	139530000	181880000	141120000	146360000	131390000	137810000	154050000	187120000	167820000	168890000	156190000	159990000	195350000	178470000	129220000	165270000	141590000	166020000	144390000	142130000	107530000	116030000	124770000	128740000	131040000	160710000	155540000	132860000	156090000	133040000	104560000	112140000	150560000	104990000	120070000	146890000	123330000	106610000
XP_021451933.1;XP_021447426.1	XP_021451933.1;XP_021447426.1	XP_021451933.1 microfibril-associated glycoprotein 4-like [Oncorhynchus mykiss];XP_021447426.1 microfibril-associated glycoprotein 4-like [Oncorhynchus mykiss]	0	0	5388800	6881600	0	8651300	6838700	7291900	0	0	0	0	0	0	0	0	0	0	0	0	0	2711000	0	7242700	8534100	15122000	12488000	14589000	18741000	23138000	4910800	19534000	20182000	17968000	7697000	12886000	19538000	10994000	7853500	8675000	4242300	4884100	7362600	10112000	6778800	10728000	10557000
XP_021447460.1;XP_021474012.1;XP_021478931.1	XP_021447460.1;XP_021474012.1;XP_021478931.1	XP_021447460.1 plastin-3-like, partial [Oncorhynchus mykiss];XP_021474012.1 plastin-3 [Oncorhynchus mykiss];XP_021478931.1 plastin-3-like [Oncorhynchus mykiss]	0	0	0	0	0	0	0	0	0	0	0	0	0	0	0	0	0	0	0	0	0	0	0	0	0	0	0	0	0	0	0	0	0	0	0	0	0	0	0	0	0	0	0	0	0	0	0
XP_021447677.1;XP_021447676.1	XP_021447677.1;XP_021447676.1	XP_021447677.1 collagen alpha-1(VI) chain-like isoform X2 [Oncorhynchus mykiss];XP_021447676.1 collagen alpha-1(VI) chain-like isoform X1 [Oncorhynchus mykiss]	3767200	3629000	0	3374800	4405700	4701400	0	0	3549500	0	0	0	0	0	0	0	0	0	0	0	7153900	0	0	0	0	0	0	0	0	0	3501900	0	0	0	0	0	0	0	0	0	0	0	0	0	0	0	0
XP_021447775.1;XP_021452586.1;XP_021448959.1;XP_021451983.1;XP_021438610.1	XP_021447775.1;XP_021452586.1;XP_021448959.1;XP_021451983.1	XP_021447775.1 collagen alpha-3(VI) chain-like, partial [Oncorhynchus mykiss];XP_021452586.1 collagen alpha-3(VI) chain-like, partial [Oncorhynchus mykiss];XP_021448959.1 collagen alpha-3(VI) chain-like, partial [Oncorhynchus mykiss];XP_021451983.1 collagen alpha-3(VI) chain-like, partial [Oncorhynchus mykiss]	10341000	0	0	0	0	0	0	0	5735000	0	0	0	0	0	0	0	0	0	0	0	9887500	11641000	6833100	3702700	5458800	4208200	2911200	4791700	3045700	0	10065000	3954800	6746800	7607100	7321500	9067100	6913100	9859200	6497400	3958100	5509200	5202700	4284600	3309100	6141300	3868000	3601800
XP_021447791.1;XP_021447790.1;XP_021447789.1;XP_021447788.1;XP_021480970.1;XP_021480962.1	XP_021447791.1;XP_021447790.1;XP_021447789.1;XP_021447788.1;XP_021480970.1;XP_021480962.1	XP_021447791.1 intercellular adhesion molecule 1-like isoform X4 [Oncorhynchus mykiss];XP_021447790.1 intercellular adhesion molecule 1-like isoform X3 [Oncorhynchus mykiss];XP_021447789.1 intercellular adhesion molecule 1-like isoform X2 [Oncorhynchus mykiss];XP_021447788.1 intercellular adhesion molecule 1-like isoform X1 [Oncorhynchus mykiss];XP_021480970.1 intercellular adhesion molecule 1-li…	0	0	0	0	0	0	0	0	0	0	0	0	0	0	0	0	0	0	0	0	0	0	0	0	0	0	5675700	0	0	0	0	0	0	0	0	0	6947400	0	0	0	0	0	0	0	0	0	0
XP_021447822.1	XP_021447822.1	XP_021447822.1 intelectin-like [Oncorhynchus mykiss]	0	0	0	0	0	0	0	0	0	0	0	0	0	0	0	0	0	0	0	0	0	0	0	0	0	0	0	0	0	0	0	0	0	0	0	0	0	0	0	3912200	0	0	0	0	0	0	0
XP_021447890.1	XP_021447890.1	XP_021447890.1 receptor-type tyrosine-protein phosphatase F-like, partial [Oncorhynchus mykiss]	0	0	0	0	0	0	7593900	7800300	8443100	6686400	0	0	0	0	0	0	8040500	0	0	8712300	5575700	7804400	7552800	0	6453100	5493600	4787500	6194200	5821500	6326800	6161300	7323400	4932700	6513800	7594900	7105200	5780800	6188800	6349300	4439200	8313700	8652900	6645600	5364900	8585000	5322800	5835000
XP_021448148.1;XP_021449120.1	XP_021448148.1;XP_021449120.1	XP_021448148.1 alpha-2-macroglobulin-like [Oncorhynchus mykiss];XP_021449120.1 alpha-2-macroglobulin-like, partial [Oncorhynchus mykiss]	0	0	0	0	0	0	0	0	0	0	0	0	0	0	0	0	0	0	0	0	0	0	0	0	0	0	0	0	0	0	0	0	0	0	0	0	0	0	0	0	0	0	0	0	0	0	0
XP_021448430.1	XP_021448430.1	XP_021448430.1 uncharacterized protein LOC110512266 [Oncorhynchus mykiss]	0	0	5098800	6269800	4085100	6594300	0	4795600	0	0	11932000	11741000	14098000	15440000	10839000	14574000	17033000	12477000	8648500	10847000	7505800	6154100	5529800	5743600	6364700	4381900	5907000	6070000	5432900	5787000	0	0	0	0	0	0	0	0	0	0	6589200	11368000	8214700	7048300	8832800	6659700	5658100
XP_021451836.1;XP_021448729.1	XP_021451836.1;XP_021448729.1	XP_021451836.1 basement membrane-specific heparan sulfate proteoglycan core protein-like, partial [Oncorhynchus mykiss];XP_021448729.1 basement membrane-specific heparan sulfate proteoglycan core protein-like [Oncorhynchus mykiss]	24040000	11387000	12395000	15321000	14217000	19360000	15940000	14004000	13490000	14739000	14275000	10164000	12742000	13091000	8752000	13358000	10570000	11288000	10935000	11866000	18315000	12252000	13920000	11337000	11014000	15354000	11627000	11408000	12501000	11882000	21321000	17164000	16994000	15723000	22256000	22642000	17117000	16375000	25802000	18865000	24548000	23163000	25255000	18960000	18121000	21776000	18015000
XP_021448892.1;XP_021449610.1;XP_021448780.1;XP_021423148.1;XP_021451437.1;XP_021451525.1;XP_021450475.1	XP_021448892.1;XP_021449610.1;XP_021448780.1;XP_021423148.1;XP_021451437.1	XP_021448892.1 histone H2B-like, partial [Oncorhynchus mykiss];XP_021449610.1 histone H2B-like [Oncorhynchus mykiss];XP_021448780.1 histone H2B [Oncorhynchus mykiss];XP_021423148.1 histone H2B-like [Oncorhynchus mykiss];XP_021451437.1 histone H2B-like [Oncorhynchus mykiss]	110870000	34244000	40318000	33474000	101050000	61598000	41910000	87764000	24111000	32182000	74768000	51164000	107050000	62746000	10726000	190890000	85249000	37701000	18692000	10994000	49164000	21721000	28554000	24680000	12207000	27039000	50421000	26214000	49854000	21983000	28484000	13207000	41682000	28420000	22984000	28408000	80490000	56745000	0	29092000	574810000	0	25008000	29656000	8522300	88301000	66966000
XP_021449015.1	XP_021449015.1	XP_021449015.1 uncharacterized protein LOC110513560 [Oncorhynchus mykiss]	0	0	10729000	0	13126000	0	0	0	14732000	0	0	0	0	0	14695000	5760300	1774500	0	20601000	0	1847100	1981300	2453800	3451000	7281300	5054200	2282400	7609200	9935700	13113000	10849000	10177000	29057000	15825000	13789000	19033000	17272000	30412000	13134000	12706000	0	0	9168200	0	11490000	0	9079500
XP_021449058.1	XP_021449058.1	XP_021449058.1 complement factor I [Oncorhynchus mykiss]	738960000	831900000	905410000	926590000	962620000	955260000	1046900000	1135200000	1074000000	1086700000	832810000	973750000	1092900000	1205400000	1226200000	1304300000	1674100000	1283400000	1189900000	1179600000	754250000	802840000	764980000	802210000	853050000	955010000	973780000	1181900000	1070300000	1183700000	1025700000	1064100000	964500000	862620000	894640000	933280000	967680000	899760000	959500000	908070000	931870000	1129600000	1325200000	1314500000	1027600000	1203700000	1190100000
XP_021449253.1	XP_021449253.1	XP_021449253.1 olfactomedin-4-like [Oncorhynchus mykiss]	81115000	106920000	99390000	111210000	99313000	76536000	103820000	109740000	117790000	100060000	35543000	61086000	78328000	45374000	45682000	65686000	36674000	80849000	103220000	64341000	54278000	71520000	139860000	162880000	241700000	113120000	76330000	75545000	97171000	88985000	53909000	64879000	91691000	114650000	72521000	97695000	72649000	119020000	149260000	275840000	67622000	73284000	45918000	64957000	177530000	61360000	86461000
XP_021449350.1	XP_021449350.1	XP_021449350.1 complement factor D-like [Oncorhynchus mykiss]	829590000	849120000	943030000	946150000	878270000	894230000	1120200000	1134700000	1126800000	927330000	792220000	812380000	841050000	815340000	805410000	888980000	321620000	928720000	882530000	865650000	598230000	581070000	607170000	550010000	512560000	700560000	747880000	799860000	824010000	788550000	730250000	736000000	697190000	655360000	648660000	750960000	845840000	952950000	770000000	595130000	556580000	651830000	845180000	750670000	605950000	653420000	665410000
XP_021449351.1	XP_021449351.1	XP_021449351.1 complement C3 alpha chain-like [Oncorhynchus mykiss]	34139000	37662000	44754000	51242000	65665000	62267000	66354000	62091000	66617000	51033000	0	28287000	10472000	38211000	27743000	32680000	0	25524000	34006000	38509000	42652000	25349000	42071000	53036000	35126000	79950000	78109000	59109000	53427000	81062000	55603000	63685000	81465000	63481000	59599000	59995000	76941000	64330000	39095000	54466000	0	26565000	46074000	52306000	28440000	49364000	44699000
XP_021479503.1;XP_021450444.1;XP_021449371.1;XP_021423150.1	XP_021479503.1;XP_021450444.1;XP_021449371.1	XP_021479503.1 histone H2A-like [Oncorhynchus mykiss];XP_021450444.1 histone H2A [Oncorhynchus mykiss];P_021449371.1 histone H2A [Oncorhynchus mykiss]	81023000	19066000	18040000	14590000	62220000	71517000	48383000	24917000	17496000	23659000	186460000	224530000	163890000	112860000	14401000	377720000	92387000	46108000	27785000	18245000	70167000	26579000	22062000	27466000	12560000	18575000	30426000	8967600	97366000	48232000	17151000	7286700	22546000	22394000	17996000	36892000	102590000	72080000	14118000	25141000	418350000	9779400	9783600	18250000	25331000	119950000	71965000
XP_021449468.1;XP_021449463.1	XP_021449468.1;XP_021449463.1	XP_021449468.1 fucolectin-6-like isoform X2 [Oncorhynchus mykiss];XP_021449463.1 uncharacterized protein LOC110514348 isoform X1 [Oncorhynchus mykiss]	684770000	552580000	553040000	465670000	506370000	543870000	521320000	511230000	513460000	535610000	387580000	347310000	348270000	334900000	340620000	324150000	463900000	342210000	367070000	306380000	199940000	220990000	177380000	184380000	173780000	132950000	210740000	191570000	198290000	183790000	442060000	468190000	390000000	403710000	460550000	435910000	334460000	366980000	405210000	276460000	308370000	266160000	236000000	230790000	263790000	227370000	206170000
XP_021449477.1	XP_021449477.1	XP_021449477.1 fucolectin-1-like [Oncorhynchus mykiss]	58788000	58626000	60631000	56834000	56659000	59919000	56119000	58555000	53687000	54771000	48975000	54288000	50596000	52066000	58545000	59440000	79395000	61458000	64707000	56110000	20242000	29421000	21631000	21075000	22505000	20734000	28725000	29304000	28370000	29070000	63841000	64813000	53323000	61403000	65208000	68664000	52605000	66745000	57629000	43859000	26333000	24009000	17174000	20572000	26151000	25850000	19406000
XP_021449847.1	XP_021449847.1	XP_021449847.1 type-4 ice-structuring protein LS-12-like [Oncorhynchus mykiss]	4405000000	3359500000	3594800000	3575000000	2702800000	3228600000	2849400000	2838700000	2616700000	1643700000	4622200000	4187800000	3510000000	4872800000	3425600000	3600800000	27705000	3319700000	3349700000	3142100000	5333500000	3976500000	4867300000	5197300000	4467100000	5407700000	3939600000	2491600000	2967800000	3239000000	4184100000	3057700000	3256300000	4040100000	4982000000	3966200000	4186000000	3150700000	3667100000	4358300000	2241800000	2046600000	2540000000	2791900000	2545200000	3340900000	2845200000
XP_021450361.1	XP_021450361.1	XP_021450361.1 apolipoprotein M [Oncorhynchus mykiss]	17655000	15512000	12964000	16113000	10005000	13110000	12754000	11909000	14297000	14590000	15403000	15381000	15229000	12754000	13091000	9936500	19801000	14535000	13393000	13222000	14738000	18420000	14221000	10393000	17773000	14334000	11831000	13027000	14289000	18208000	14780000	15879000	18143000	15366000	13396000	15451000	22329000	19303000	18862000	18747000	7599300	13973000	11065000	9065900	15833000	12191000	15063000
XP_021450472.1;XP_021451825.1	XP_021450472.1;XP_021451825.1	XP_021450472.1 aminopeptidase N-like [Oncorhynchus mykiss];XP_021451825.1 aminopeptidase N-like, partial [Oncorhynchus mykiss]	0	0	0	0	0	0	0	0	0	0	0	0	0	0	0	0	0	0	0	0	0	0	0	0	0	0	0	0	0	0	0	0	0	0	0	0	0	0	0	0	0	0	0	0	0	0	0
XP_021451128.1	XP_021451128.1	XP_021451128.1 complement C3-like [Oncorhynchus mykiss]	3473900000	5460700000	5490900000	5722600000	6550300000	6174800000	6648900000	6376800000	5325700000	5211300000	3378300000	5224400000	6091900000	5988500000	6466900000	5967300000	7992400000	5397500000	4798900000	4386100000	2170000000	3143000000	3132800000	3638200000	4731200000	3783900000	4168500000	5296100000	6081000000	6082800000	2719900000	4278800000	4020700000	3639900000	3534600000	3397400000	2847800000	2533100000	2517100000	3858500000	2354700000	4280800000	4404200000	4675000000	4693700000	4503800000	4056200000
XP_021451323.1;XP_021449060.1	XP_021451323.1	XP_021451323.1 microfibril-associated glycoprotein 4-like [Oncorhynchus mykiss]	0	12760000	11674000	34164000	99900000	82811000	113460000	90831000	73607000	62327000	19248000	42042000	105040000	127560000	185370000	208820000	81753000	130360000	73433000	72622000	37329000	57464000	29780000	109290000	203570000	260750000	195860000	251970000	219310000	291470000	39390000	112460000	80335000	81694000	84059000	86544000	52391000	55610000	42157000	53312000	42853000	171170000	97541000	98873000	95108000	72672000	103300000
XP_021451391.1;XP_021416281.1;XP_021427640.1	XP_021451391.1	XP_021451391.1 triosephosphate isomerase B-like [Oncorhynchus mykiss]	51400000	45398000	40672000	29982000	13129000	18411000	31142000	13933000	9604100	15341000	138060000	114030000	28446000	25738000	23155000	22276000	6118000	10569000	8787300	40661000	57564000	38573000	14193000	16675000	26070000	17218000	84636000	19193000	20194000	34971000	9280000	18097000	7311300	70861000	8620500	9611200	12398000	9084900	8239700	29450000	106630000	23917000	12303000	19151000	30924000	12973000	58472000
XP_021451414.1	XP_021451414.1	XP_021451414.1 complement C4-like [Oncorhynchus mykiss]	0	0	0	0	0	0	0	0	0	0	0	0	0	0	0	0	0	0	0	0	0	0	0	0	0	0	0	0	0	0	0	0	0	0	0	0	0	0	0	0	0	0	0	0	0	0	0
XP_021451872.1	XP_021451872.1	XP_021451872.1 immunoglobulin kappa light chain-like [Oncorhynchus mykiss]	0	0	0	0	0	0	0	0	0	0	0	0	0	0	0	0	0	0	0	0	0	0	0	0	0	0	0	0	0	0	5705000	0	0	0	0	0	0	0	0	0	0	8028900	0	0	0	0	9984100
XP_021451946.1	XP_021451946.1	XP_021451946.1 complement C4-like, partial [Oncorhynchus mykiss]	67209000	89375000	95746000	109400000	108760000	86698000	100590000	87191000	121160000	92222000	54548000	111160000	89584000	123340000	115760000	101580000	89655000	93544000	93405000	118330000	40309000	26318000	42992000	45390000	35094000	58022000	54027000	45701000	45866000	59324000	98170000	95770000	110940000	80171000	86165000	79760000	154500000	82090000	53824000	65389000	31263000	62861000	89079000	72209000	49113000	90667000	77412000
XP_021451996.1;XP_021449278.1;XP_021449279.1	XP_021451996.1;XP_021449278.1	XP_021451996.1 apolipoprotein Eb-like [Oncorhynchus mykiss];XP_021449278.1 apolipoprotein Eb-like, partial [Oncorhynchus mykiss]	152810000	102820000	167490000	158640000	145350000	208190000	193880000	87205000	164890000	209510000	201930000	95989000	206780000	228160000	177700000	219710000	48920000	144730000	270390000	300120000	352120000	193820000	544060000	562160000	486490000	510160000	207470000	89087000	233270000	303620000	343850000	157180000	340870000	572690000	448280000	343130000	289040000	146510000	288590000	1124600000	240130000	116300000	182150000	278770000	319770000	214670000	258900000
XP_021452373.1;XP_021419706.1	XP_021452373.1;XP_021419706.1	XP_021452373.1 complement C1q-like protein 2 [Oncorhynchus mykiss];XP_021419706.1 complement C1q-like protein 2 [Oncorhynchus mykiss]	23027000	20791000	23806000	22260000	25197000	29390000	28672000	26105000	24712000	22260000	35444000	24823000	29805000	31175000	30753000	31814000	0	29132000	22593000	25610000	24502000	19622000	18303000	22650000	19758000	15855000	16756000	8708200	17253000	31680000	22332000	18059000	22522000	26693000	0	27736000	25165000	23459000	26021000	18688000	0	0	21205000	17686000	0	27334000	13647000
XP_021452440.1;XP_021448228.1	XP_021452440.1;XP_021448228.1	XP_021452440.1 complement C3-like, partial [Oncorhynchus mykiss];XP_021448228.1 complement C3-like [Oncorhynchus mykiss]	72571000	79985000	78541000	93266000	91443000	105830000	132090000	111200000	113080000	107840000	124970000	90819000	131140000	106240000	116700000	128420000	193850000	124540000	104160000	110750000	69321000	84770000	78746000	85255000	99860000	121910000	118120000	117040000	110690000	125010000	104620000	114130000	91063000	76983000	92492000	84381000	103080000	72996000	95442000	94724000	79287000	92242000	95284000	98370000	83686000	91812000	97426000
XP_021452467.1;XP_021452466.1;XP_021452465.1	XP_021452467.1;XP_021452466.1;XP_021452465.1	XP_021452467.1 neural cell adhesion molecule 1-like isoform X3 [Oncorhynchus mykiss];XP_021452466.1 neural cell adhesion molecule 1-like isoform X2 [Oncorhynchus mykiss];XP_021452465.1 neural cell adhesion molecule 1-like isoform X1 [Oncorhynchus mykiss]	0	0	0	0	0	0	0	0	0	0	0	0	0	0	0	0	0	0	0	0	0	0	0	0	0	0	0	0	0	0	0	0	0	0	0	0	0	0	0	0	0	0	0	0	0	0	0
XP_021452473.1;XP_021452472.1;NP_001117718.1	XP_021452473.1;XP_021452472.1;NP_001117718.1	XP_021452473.1 glyceraldehyde-3-phosphate dehydrogenase isoform X2 [Oncorhynchus mykiss];XP_021452472.1 glyceraldehyde-3-phosphate dehydrogenase isoform X1 [Oncorhynchus mykiss];NP_001117718.1 glyceraldehyde-3-phosphate dehydrogenase [Oncorhynchus mykiss]	0	0	0	0	0	0	0	0	0	0	0	0	0	0	0	0	0	0	0	0	0	0	0	0	0	0	0	0	3453600	0	0	0	0	3282900	0	0	0	0	0	0	15711000	0	0	0	0	0	0
XP_021453209.1;XP_021453208.1;XP_021453207.1;XP_021453206.1;XP_021453204.1;XP_021453203.1;XP_021453202.1;XP_021453205.1	XP_021453209.1;XP_021453208.1;XP_021453207.1;XP_021453206.1;XP_021453204.1;XP_021453203.1;XP_021453202.1;XP_021453205.1	XP_021453209.1 titin-like isoform X8 [Oncorhynchus mykiss];XP_021453208.1 titin-like isoform X7 [Oncorhynchus mykiss];XP_021453207.1 titin-like isoform X6 [Oncorhynchus mykiss];XP_021453206.1 titin-like isoform X5 [Oncorhynchus mykiss];XP_021453204.1 titin-like isoform X3 [Oncorhynchus mykiss];XP_021453203.1 titin-like isoform X2 [Oncorhynchus mykiss];XP_021453202.1 titin-like isoform X1 [Oncorhy…	0	0	0	0	0	0	0	0	0	0	0	0	0	0	0	0	0	0	0	0	0	0	0	0	0	0	0	0	0	0	0	0	0	0	0	0	3001200	0	0	0	0	0	2543900	4927600	0	0	3554500
XP_021453260.1;XP_021475427.1	XP_021453260.1	XP_021453260.1 plastin-2 [Oncorhynchus mykiss]	40995000	25553000	36205000	57057000	61336000	52439000	44302000	52540000	52562000	62596000	32156000	29083000	36644000	48034000	44094000	44631000	48634000	35515000	37672000	53578000	30839000	27962000	30692000	35149000	41073000	36895000	35942000	41970000	56225000	57137000	37603000	48063000	43843000	52482000	51919000	50310000	47199000	69034000	65278000	62200000	34696000	34748000	29368000	38570000	36603000	42047000	34971000
XP_021453338.1	XP_021453338.1	XP_021453338.1 apolipoprotein A-I-like [Oncorhynchus mykiss]	295830000	228700000	410440000	623840000	452220000	567970000	385660000	239430000	271010000	343190000	329150000	245450000	407850000	580840000	457860000	434190000	0	199180000	288700000	423470000	320770000	368560000	531110000	578920000	526710000	591640000	311830000	180070000	246430000	314240000	262100000	184300000	308990000	417440000	592420000	428910000	271430000	198020000	216200000	328010000	300460000	288510000	311320000	383770000	400620000	323280000	242540000
XP_021453746.1	XP_021453746.1	XP_021453746.1 hemopexin [Oncorhynchus mykiss]	18788000000	19083000000	18667000000	17224000000	16102000000	14932000000	17140000000	16725000000	17482000000	18141000000	17294000000	18237000000	18074000000	18179000000	16899000000	16992000000	23827000000	16657000000	15250000000	15749000000	13798000000	12798000000	11458000000	11462000000	9999200000	9601200000	10721000000	9686100000	9527100000	8903200000	12908000000	12596000000	11252000000	10595000000	11017000000	11610000000	12746000000	13948000000	14014000000	11149000000	14733000000	14014000000	15790000000	14209000000	11960000000	14399000000	15597000000
XP_021453770.1	XP_021453770.1	XP_021453770.1 complement C1q-like protein 2 [Oncorhynchus mykiss]	0	0	0	0	0	0	0	0	0	0	0	0	0	0	0	5529600	6121700	0	0	0	0	0	5892500	0	5188300	6153400	5923200	6371300	0	6359700	0	8928400	6552000	0	0	0	0	0	0	0	0	0	0	0	0	0	0
XP_021454013.1	XP_021454013.1	XP_021454013.1 ictacalcin-like [Oncorhynchus mykiss]	8468100	4787100	10089000	11965000	7008500	6753100	5087400	8996100	6395200	7527100	2714900	4599900	4201900	6503100	4396200	3870900	4757700	3364700	3989100	6842700	9311800	4685300	6518700	7049800	5267400	6599900	6299500	7723900	5197500	10059000	10827000	12333000	11719000	14017000	7638800	6754100	9983300	9457200	7247000	9392600	6558800	5070600	6553800	8639800	4464600	7628200	5420600
XP_021454597.1	XP_021454597.1	XP_021454597.1 fibulin-1-like isoform X1 [Oncorhynchus mykiss]	26720000	25247000	21338000	19558000	20891000	24576000	19213000	26035000	20848000	21137000	19473000	16017000	19115000	18716000	15844000	17423000	21215000	20811000	16861000	18288000	17023000	18269000	12347000	14874000	15503000	15162000	10604000	11133000	15370000	11855000	21512000	21404000	17478000	17932000	24069000	24748000	23679000	27986000	22848000	17791000	17959000	16239000	12448000	15963000	15620000	13386000	13378000
XP_021454598.1	XP_021454598.1	XP_021454598.1 fibulin-1-like isoform X2 [Oncorhynchus mykiss]	0	0	0	0	0	0	0	0	0	0	0	0	0	0	0	0	0	0	0	0	0	0	0	0	0	0	0	0	0	0	0	0	0	0	0	0	0	0	0	0	0	0	0	0	0	0	0
XP_021454889.1;XP_021459757.1;XP_021459756.1	XP_021454889.1	XP_021454889.1 sulfhydryl oxidase 1-like [Oncorhynchus mykiss]	68201000	65439000	60197000	63132000	55301000	62327000	58064000	60938000	52491000	60083000	82923000	68638000	73567000	75270000	68271000	61718000	90288000	80630000	72307000	69182000	71033000	71378000	60266000	52123000	49617000	54099000	52930000	56781000	51199000	48690000	66658000	61678000	63529000	60913000	76085000	78870000	60127000	68776000	72367000	55731000	66382000	59018000	64455000	67781000	59708000	66645000	61349000
XP_021454929.1	XP_021454929.1	XP_021454929.1 kininogen-1-like [Oncorhynchus mykiss]	2313000000	2113300000	2022000000	1830100000	1665000000	1595000000	1686800000	1775200000	1766200000	1687200000	1798000000	1817300000	1613100000	1775300000	1851600000	1654000000	1506100000	1879500000	1985900000	1829900000	2021800000	2123700000	1783500000	1759300000	1737400000	1501100000	1705100000	1650400000	1948100000	1621800000	2001800000	2025600000	1904700000	1797200000	2052800000	2091000000	1840800000	2308600000	2340200000	1588900000	1925200000	2057300000	1741400000	1687500000	1802000000	1735800000	1802700000
XP_021454984.1;XP_021459903.1	XP_021454984.1	XP_021454984.1 myocilin-like [Oncorhynchus mykiss]	9466000	10943000	9377000	10538000	9950400	11821000	9043500	0	8409400	0	0	0	0	0	0	0	0	0	0	0	0	0	0	0	0	7915700	0	0	0	0	0	0	10070000	0	9508300	9727800	12357000	0	0	0	0	0	0	0	0	0	0
XP_021455131.1;XP_021455130.1;XP_021455129.1;XP_021455128.1;XP_021455127.1	XP_021455131.1;XP_021455130.1;XP_021455129.1;XP_021455128.1;XP_021455127.1	XP_021455131.1 proteoglycan 4 isoform X4 [Oncorhynchus mykiss];XP_021455130.1 proteoglycan 4 isoform X3 [Oncorhynchus mykiss];XP_021455129.1 proteoglycan 4 isoform X3 [Oncorhynchus mykiss];XP_021455128.1 proteoglycan 4 isoform X2 [Oncorhynchus mykiss];XP_021455127.1 proteoglycan 4 isoform X1 [Oncorhynchus mykiss]	239370000	217030000	218840000	222390000	242620000	230590000	261990000	266580000	229730000	232250000	175090000	219240000	198330000	216340000	225570000	224690000	3323500	215640000	184390000	234850000	225530000	245600000	203990000	209640000	216330000	263860000	253210000	284820000	256220000	272340000	252340000	294550000	236180000	230770000	312280000	285040000	265750000	240950000	242180000	228320000	201220000	309470000	280860000	253250000	251800000	257410000	237060000
XP_021456136.1	XP_021456136.1	XP_021456136.1 clusterin [Oncorhynchus mykiss]	65552000	59132000	53073000	57942000	41163000	47554000	34178000	39106000	55908000	49617000	46432000	46529000	32117000	39714000	41773000	39622000	0	38977000	47252000	41359000	69268000	45398000	61433000	46692000	42261000	56309000	37266000	28876000	29913000	32128000	57837000	53238000	55671000	47786000	44996000	50689000	67476000	62676000	53292000	45759000	26281000	26467000	39235000	35056000	31452000	30366000	30440000
XP_021456332.1	XP_021456332.1	XP_021456332.1 CD44 antigen-like [Oncorhynchus mykiss]	12065000	13233000	16563000	13328000	16653000	13868000	16828000	15861000	21663000	19918000	19006000	17889000	19414000	18920000	19678000	20917000	20859000	24407000	28839000	21045000	20870000	20857000	18432000	16832000	16821000	15823000	17518000	17178000	19178000	15685000	25993000	25714000	19503000	16154000	16593000	18886000	20562000	27181000	35113000	20753000	22542000	24115000	22942000	19722000	15860000	20364000	23163000
XP_021456715.1;XP_021466984.1;XP_021440442.1;XP_021430111.1;XP_021451882.1;XP_021449481.1;XP_021437072.1;XP_021437071.1;XP_021432084.1	XP_021456715.1;XP_021466984.1	XP_021456715.1 thrombospondin-1-like [Oncorhynchus mykiss];XP_021466984.1 thrombospondin-1-like [Oncorhynchus mykiss]	28592000	23233000	22458000	19654000	9080200	6163000	6979500	5741100	13326000	12184000	35708000	22212000	18755000	13027000	10364000	9552800	6185200	9887500	7890500	10548000	27688000	22181000	11600000	4922000	2306900	5121700	6954700	0	5297300	5327100	20276000	11509000	11044000	10516000	7886300	5080800	9972600	6387300	5259200	4351600	25757000	26018000	11856000	13191000	10763000	11295000	11044000
XP_021457616.1	XP_021457616.1	XP_021457616.1 peptidyl-prolyl cis-trans isomerase A-like [Oncorhynchus mykiss]	0	0	0	0	0	0	0	0	0	0	0	0	0	0	0	0	0	0	0	0	0	0	0	0	0	0	0	0	0	0	0	0	0	0	0	0	4300600	3857800	0	6403300	14282000	0	0	0	0	0	0
XP_021457645.1;XP_021477738.1;XP_021462148.1	XP_021457645.1;XP_021477738.1;XP_021462148.1	XP_021457645.1 ATP synthase subunit alpha, mitochondrial [Oncorhynchus mykiss];XP_021477738.1 ATP synthase subunit alpha, mitochondrial-like [Oncorhynchus mykiss];XP_021462148.1 ATP synthase subunit alpha, mitochondrial-like [Oncorhynchus mykiss]	0	0	0	0	0	0	0	0	0	0	0	0	0	0	0	0	0	0	0	0	0	0	0	0	0	0	0	0	0	0	0	0	0	0	0	0	0	0	0	0	2865200	0	0	0	0	0	0
XP_021457661.1;XP_021457660.1;XP_021457662.1;XP_021456960.1	XP_021457661.1;XP_021457660.1;XP_021457662.1;XP_021456960.1	XP_021457661.1 apolipoprotein A-IV-like [Oncorhynchus mykiss];XP_021457660.1 apolipoprotein A-IV-like [Oncorhynchus mykiss];XP_021457662.1 apolipoprotein A-IV-like [Oncorhynchus mykiss];XP_021456960.1 apolipoprotein A-IV-like, partial [Oncorhynchus mykiss]	53446000	38023000	98425000	134890000	75002000	86566000	52907000	21652000	46286000	70482000	91554000	45899000	136360000	165390000	98397000	106570000	5696200	26791000	65017000	115570000	59607000	67484000	146720000	150680000	99295000	99803000	47072000	19180000	35484000	43254000	63048000	40022000	91584000	130680000	175580000	103440000	49634000	38683000	58221000	109480000	68161000	48887000	66523000	80306000	85029000	48957000	37875000
XP_021457990.1;XP_021457989.1	XP_021457990.1;XP_021457989.1	XP_021457990.1 phosphoglycerate mutase 2-like isoform X2 [Oncorhynchus mykiss];XP_021457989.1 phosphoglycerate mutase 2-like isoform X1 [Oncorhynchus mykiss]	0	0	0	0	0	0	0	0	0	0	0	0	0	0	0	0	0	0	0	0	0	0	0	0	0	0	0	0	0	0	0	0	0	0	0	0	0	0	0	0	1029200	0	0	0	0	0	0
XP_021458771.1;XP_021478341.1	XP_021458771.1;XP_021478341.1	XP_021458771.1 spermatid perinuclear RNA-binding protein isoform X2 [Oncorhynchus mykiss];XP_021478341.1 spermatid perinuclear RNA-binding protein-like [Oncorhynchus mykiss]	0	0	0	0	0	0	0	0	0	0	0	0	0	0	0	0	0	0	0	0	0	0	0	0	0	0	0	0	0	0	0	0	0	0	0	0	0	0	0	0	0	0	0	0	0	0	0
XP_021458782.1	XP_021458782.1	XP_021458782.1 protein AMBP-like [Oncorhynchus mykiss]	195800000	181220000	180430000	183200000	166400000	193670000	221310000	212440000	182080000	201160000	163170000	170350000	154900000	162540000	162490000	177430000	259690000	142290000	127210000	162600000	246180000	224540000	221940000	245170000	193550000	288790000	242360000	242950000	203800000	223640000	247120000	185150000	225760000	198020000	210640000	187070000	257730000	182430000	176800000	199430000	142950000	177980000	223880000	199310000	148040000	181940000	172550000
XP_021458786.1;XP_021458785.1;XP_021458784.1;XP_021458783.1	XP_021458786.1;XP_021458785.1;XP_021458784.1;XP_021458783.1	XP_021458786.1 neutrophil gelatinase-associated lipocalin isoform X2 [Oncorhynchus mykiss];XP_021458785.1 neutrophil gelatinase-associated lipocalin isoform X2 [Oncorhynchus mykiss];XP_021458784.1 neutrophil gelatinase-associated lipocalin isoform X1 [Oncorhynchus mykiss];XP_021458783.1 neutrophil gelatinase-associated lipocalin isoform X1 [Oncorhynchus mykiss]	0	0	0	0	0	0	0	0	0	0	0	0	0	0	0	0	0	0	0	0	0	0	0	0	0	0	0	0	0	0	0	0	0	0	0	0	6363300	0	0	0	0	0	0	0	0	0	0
XP_021459113.1;XP_021459112.1	XP_021459113.1;XP_021459112.1	XP_021459113.1 antithrombin-III-like isoform X2 [Oncorhynchus mykiss];XP_021459112.1 antithrombin-III-like isoform X1 [Oncorhynchus mykiss]	53171000	77322000	62154000	67955000	53696000	78881000	76088000	51842000	75905000	46082000	28929000	42956000	34171000	36852000	48176000	37644000	58431000	53614000	82594000	73925000	130010000	142560000	124030000	104380000	78886000	105300000	124470000	107780000	92672000	100750000	167800000	153320000	157730000	151070000	101740000	172050000	142800000	129580000	104040000	103220000	128030000	75310000	107200000	81214000	89016000	109920000	106720000
XP_021459606.1	XP_021459606.1	XP_021459606.1 cysteine-rich motor neuron 1 protein-like [Oncorhynchus mykiss]	0	0	0	0	0	0	0	0	0	0	0	0	0	0	0	0	0	0	0	0	0	0	0	0	0	1311500	0	0	0	0	0	0	0	0	0	0	566210	0	0	0	0	0	0	0	0	1047800	0
XP_021459672.1	XP_021459672.1	XP_021459672.1 carboxypeptidase N subunit 2-like [Oncorhynchus mykiss]	0	0	0	0	0	0	0	0	0	0	0	0	0	0	0	0	0	0	0	0	0	4021300	0	0	0	0	0	0	0	0	0	3664300	0	0	0	0	0	4851700	0	0	4781200	0	0	0	0	0	0
XP_021459821.1;XP_021459820.1;XP_021459819.1;XP_021459817.1	XP_021459821.1;XP_021459820.1;XP_021459819.1;XP_021459817.1	XP_021459821.1 kininogen-1-like [Oncorhynchus mykiss];XP_021459820.1 kininogen-1-like [Oncorhynchus mykiss];XP_021459819.1 kininogen-1-like [Oncorhynchus mykiss];XP_021459817.1 kininogen-1-like [Oncorhynchus mykiss]	194110000	173530000	154130000	140670000	137190000	145520000	134010000	131060000	117660000	120020000	156470000	177090000	148480000	161940000	157450000	147410000	39175000	146680000	137730000	139340000	201180000	192260000	188150000	166040000	166820000	141410000	147110000	124520000	125370000	110620000	175430000	171210000	141020000	182930000	186630000	188640000	134490000	175680000	149930000	112930000	186110000	153440000	139890000	138040000	146670000	127900000	116700000
XP_021460372.1;XP_021460373.1	XP_021460372.1;XP_021460373.1	XP_021460372.1 complement factor H-like isoform X1 [Oncorhynchus mykiss];XP_021460373.1 complement factor H-related protein 1-like isoform X2 [Oncorhynchus mykiss]	582550000	948580000	1066400000	1091600000	1284400000	1299200000	1415500000	1285700000	1220700000	1217100000	463410000	994790000	1192900000	1290300000	1491700000	1453100000	1967200000	1101500000	1162500000	1248400000	504770000	737580000	828140000	984650000	976580000	1275600000	1283900000	1574100000	1715100000	2013200000	906930000	1076400000	1195100000	1127000000	1060700000	1104000000	1116600000	1159300000	998480000	1192200000	711800000	1142400000	1346200000	1299700000	945420000	1165500000	1035400000
XP_021460374.1	XP_021460374.1	XP_021460374.1 complement factor H-related protein 2-like [Oncorhynchus mykiss]	78593000	111320000	101240000	124250000	130100000	139160000	147640000	134550000	54911000	151560000	114940000	207780000	243580000	216110000	236040000	258370000	242560000	226120000	171850000	204360000	94065000	121120000	114880000	144430000	153670000	185320000	148800000	220680000	205770000	246350000	37868000	125970000	109490000	94692000	110120000	114420000	42583000	99119000	73084000	98298000	11170000	91710000	54081000	38611000	72628000	38537000	34616000
XP_021460375.1	XP_021460375.1	XP_021460375.1 complement factor H-like [Oncorhynchus mykiss]	126360000	213030000	262630000	235730000	338520000	267270000	342540000	329810000	346190000	331830000	199480000	293150000	486640000	517590000	489400000	750610000	1033800000	730910000	687410000	488940000	191090000	367440000	314850000	291580000	410260000	429990000	388510000	627960000	938790000	888990000	353890000	360240000	391260000	331030000	331410000	316140000	340820000	367110000	416340000	390000000	427610000	681160000	561220000	448340000	528340000	562100000	520310000
XP_021460404.1	XP_021460404.1	XP_021460404.1 melanotransferrin-like [Oncorhynchus mykiss]	0	0	0	0	0	0	0	0	0	0	0	0	0	0	0	0	0	0	0	0	0	0	0	0	0	0	0	0	0	0	0	0	0	0	0	0	0	0	0	0	0	0	0	0	0	0	0
XP_021460411.1	XP_021460411.1	XP_021460411.1 histidine-rich glycoprotein-like [Oncorhynchus mykiss]	7796700000	7463200000	6902100000	7223200000	6493500000	6067800000	7088800000	6701600000	7334700000	7031600000	4198500000	6205100000	5434500000	5762100000	5346000000	5075000000	4637900000	4881500000	4775100000	5867400000	7346300000	6074500000	6544700000	6526400000	5273400000	7410800000	6715600000	6030900000	5817700000	6851300000	7920100000	6798100000	7414500000	6172600000	6046800000	6000700000	9089500000	6094400000	6287200000	5457700000	5417000000	5529000000	7800900000	7540900000	4464700000	7164100000	7446600000
XP_021460419.1	XP_021460419.1	XP_021460419.1 ceruloplasmin-like [Oncorhynchus mykiss]	1690800000	1654200000	1720900000	1635600000	1637700000	1670800000	1647700000	1695500000	1514900000	1574400000	2138100000	2171000000	2040000000	1947200000	2094400000	1943300000	2905300000	2110500000	2066400000	1831100000	1516900000	1704200000	1521800000	1380800000	1339900000	1383200000	1560900000	1626100000	1915900000	1806000000	1544900000	1839300000	2078700000	1876700000	1957400000	1914100000	1495500000	1527900000	1559800000	1266600000	1432900000	1585000000	1680700000	1547800000	1506400000	1532300000	1449300000
XP_021460473.1;XP_021460472.1;XP_021460471.1;XP_021460470.1;XP_021460469.1;XP_021460468.1;XP_021460466.1;XP_021460465.1;XP_021460464.1;XP_021460463.1;XP_021460462.1;XP_021460461.1;XP_021460460.1;XP_021460459.1;XP_021460458.1;XP_021460457.1;XP_021460456.1;XP_021460455.1;XP_021460454.1;XP_021460453.1;XP_021460452.1;XP_021460450.1;XP_021460449.1;XP_021460448.1;XP_021460447.1;XP_021460446.1;XP_021460…	XP_021460473.1;XP_021460472.1;XP_021460471.1;XP_021460470.1;XP_021460469.1;XP_021460468.1;XP_021460466.1;XP_021460465.1;XP_021460464.1;XP_021460463.1;XP_021460462.1;XP_021460461.1;XP_021460460.1;XP_021460459.1;XP_021460458.1;XP_021460457.1;XP_021460456.1;XP_021460455.1;XP_021460454.1;XP_021460453.1;XP_021460452.1;XP_021460450.1;XP_021460449.1;XP_021460448.1;XP_021460447.1;XP_021460446.1;XP_021460…	XP_021460473.1 uncharacterized protein LOC110524842 isoform X34 [Oncorhynchus mykiss];XP_021460472.1 uncharacterized protein LOC110524842 isoform X33 [Oncorhynchus mykiss];XP_021460471.1 uncharacterized protein LOC110524842 isoform X32 [Oncorhynchus mykiss];XP_021460470.1 uncharacterized protein LOC110524842 isoform X31 [Oncorhynchus mykiss];XP_021460469.1 uncharacterized protein LOC110524842 iso…	0	0	0	0	0	0	0	0	0	0	0	0	0	0	0	0	0	0	0	0	0	0	0	0	0	0	0	0	0	0	0	0	0	0	0	0	0	0	0	0	0	0	0	0	0	0	0
XP_021460754.1	XP_021460754.1	XP_021460754.1 fructose-1,6-bisphosphatase isozyme 2-like [Oncorhynchus mykiss]	0	0	0	0	0	0	0	0	0	0	0	0	0	0	0	0	0	0	0	0	1246700	0	0	0	0	0	2141100	0	0	0	0	0	0	1840300	0	0	0	0	0	0	1883800	0	0	0	0	0	0
XP_021460894.1	XP_021460894.1	XP_021460894.1 histone H1-like [Oncorhynchus mykiss]	0	0	0	0	0	0	0	0	0	0	0	0	0	0	0	0	0	0	0	0	0	0	0	0	0	0	0	0	0	0	0	0	0	0	0	0	0	0	0	0	0	0	0	0	0	915480	0
XP_021461142.1	XP_021461142.1	XP_021461142.1 alpha-1-antitrypsin-like protein CM55-ST [Oncorhynchus mykiss]	210530000	208610000	228710000	211690000	189260000	255460000	241640000	261620000	234570000	255010000	233310000	296420000	288510000	276630000	262300000	279850000	142470000	269170000	321850000	336820000	447390000	426230000	432340000	349640000	315050000	354360000	439760000	475120000	513340000	532010000	582870000	547000000	639300000	626930000	579790000	610770000	585620000	671540000	558490000	454610000	344360000	359270000	363360000	343040000	342500000	343560000	325700000
XP_021461250.1	XP_021461250.1	XP_021461250.1 lipocalin-like [Oncorhynchus mykiss]	84545000	76406000	74823000	72521000	70004000	55393000	66656000	61825000	57590000	0	61979000	59243000	58743000	55278000	57968000	60523000	79887000	65386000	59126000	52897000	56244000	67256000	55630000	49200000	55022000	42595000	51236000	56755000	55965000	36006000	63379000	56689000	63054000	64962000	69457000	69781000	58667000	69055000	66392000	49464000	45995000	51296000	41355000	45770000	49662000	49693000	42986000
XP_021476876.1;XP_021461293.1;XP_021481303.1;XP_021414181.1;XP_021481302.1;XP_021414180.1;XP_021416727.1;XP_021439470.1;XP_021457431.1;XP_021464614.1;XP_021427183.1;XP_021427662.1;XP_021416265.1;XP_021463140.1;XP_021442002.1;XP_021412565.1;XP_021438070.1;XP_021476327.1;XP_021418756.1;XP_021476326.1	XP_021476876.1;XP_021461293.1;XP_021481303.1;XP_021414181.1;XP_021481302.1;XP_021414180.1;XP_021416727.1;XP_021439470.1;XP_021457431.1;XP_021464614.1;XP_021427183.1;XP_021427662.1;XP_021416265.1	XP_021476876.1 tubulin beta-1 chain [Oncorhynchus mykiss];XP_021461293.1 tubulin beta-1 chain [Oncorhynchus mykiss];XP_021481303.1 tubulin beta-4B chain-like [Oncorhynchus mykiss];XP_021414181.1 tubulin beta-4B chain-like [Oncorhynchus mykiss];XP_021481302.1 tubulin beta-4B chain-like [Oncorhynchus mykiss];XP_021414180.1 tubulin beta-4B chain-like [Oncorhynchus mykiss];XP_021416727.1 tubulin beta…	0	0	0	0	0	0	0	0	0	0	2728800	0	2851800	2316100	0	3153000	0	0	0	0	1715100	0	1389900	0	0	1692400	2750000	0	2901800	0	0	0	0	1832100	0	0	1944700	1312900	0	1221300	17346000	0	1240500	1204500	0	4510300	1563500
XP_021461640.1	XP_021461640.1	XP_021461640.1 hyaluronan-binding protein 2 [Oncorhynchus mykiss]	2268200000	2072700000	2054300000	1823800000	1751500000	1585700000	1644500000	1738800000	1790100000	1731700000	1950800000	1891500000	1734800000	1700600000	1483200000	1342800000	997430000	1604100000	1711200000	1563900000	1966800000	1876600000	1545200000	1426500000	1316600000	1236100000	1291800000	1298300000	1302200000	1111600000	1707500000	1583400000	1377100000	1421000000	1508600000	1525700000	1439000000	1620300000	1581500000	1209200000	1882600000	1956900000	1794900000	1714000000	1578100000	1708000000	1673400000
XP_021461733.1;XP_021461729.1;XP_021461728.1;XP_021461727.1;XP_021461726.1;XP_021461725.1;XP_021461724.1;XP_021461723.1;XP_021461722.1;XP_021461721.1;XP_021461720.1;XP_021461731.1;XP_021461730.1	XP_021461733.1;XP_021461729.1;XP_021461728.1;XP_021461727.1;XP_021461726.1;XP_021461725.1;XP_021461724.1;XP_021461723.1;XP_021461722.1;XP_021461721.1;XP_021461720.1;XP_021461731.1	XP_021461733.1 CAP-Gly domain-containing linker protein 1-like isoform X8 [Oncorhynchus mykiss];XP_021461729.1 CAP-Gly domain-containing linker protein 1-like isoform X5 [Oncorhynchus mykiss];XP_021461728.1 CAP-Gly domain-containing linker protein 1-like isoform X4 [Oncorhynchus mykiss];XP_021461727.1 CAP-Gly domain-containing linker protein 1-like isoform X3 [Oncorhynchus mykiss];XP_021461726.1 …	0	0	0	0	26479000	19831000	0	18747000	30972000	0	51477000	0	48297000	0	0	0	0	0	0	0	0	0	0	0	0	0	0	0	0	0	0	0	0	0	0	0	0	0	0	0	0	0	0	0	0	0	0
XP_021461878.1;XP_021458680.1;XP_021478425.1;XP_021459211.1;XP_021424632.1	XP_021461878.1	XP_021461878.1 thrombospondin-4-B-like [Oncorhynchus mykiss]	119970000	120740000	133670000	100440000	111780000	155890000	127240000	118890000	107160000	107480000	81239000	67792000	94290000	74505000	86710000	105360000	77099000	90295000	85973000	80419000	78055000	89706000	70928000	52084000	57327000	67348000	61115000	56750000	69148000	51222000	63891000	63838000	64218000	65037000	84591000	87899000	59534000	77189000	68877000	52336000	76186000	87277000	75524000	59481000	80580000	71682000	64678000
XP_021461954.1	XP_021461954.1	XP_021461954.1 putative aminopeptidase W07G4.4 [Oncorhynchus mykiss]	0	0	0	0	0	0	0	0	0	0	0	0	0	0	0	0	0	0	0	0	0	0	0	4089800	0	1710800	3341400	2505900	5303900	5430300	0	3433400	3933100	0	4911400	5657100	4527800	5768900	5108400	4735800	0	0	1189100	0	0	0	0
XP_021462198.1;XP_021462197.1	XP_021462198.1;XP_021462197.1	XP_021462198.1 selenoprotein P [Oncorhynchus mykiss];XP_021462197.1 selenoprotein P [Oncorhynchus mykiss]	50936000	45787000	43928000	34909000	38513000	40451000	48234000	40692000	46064000	43338000	42533000	55406000	47662000	28723000	51136000	41746000	13070000	50552000	57657000	46135000	0	0	0	0	0	0	0	0	0	0	0	0	0	0	0	0	0	0	0	0	0	0	0	0	0	0	0
XP_021477817.1;XP_021462272.1	XP_021477817.1;XP_021462272.1	XP_021477817.1 glycine-rich RNA-binding protein GRP1A-like [Oncorhynchus mykiss];XP_021462272.1 glycine-rich RNA-binding protein 1-like [Oncorhynchus mykiss]	0	0	0	0	0	0	0	0	0	0	0	0	0	0	0	0	0	0	0	0	0	0	0	2374100	0	0	0	0	1584000	0	0	0	0	0	2569500	0	1835500	0	0	0	14656000	0	0	0	0	0	0
XP_021462341.1;XP_021462340.1	XP_021462341.1;XP_021462340.1	XP_021462341.1 heparin cofactor 2 isoform X2 [Oncorhynchus mykiss];XP_021462340.1 heparin cofactor 2 isoform X1 [Oncorhynchus mykiss]	374440000	317570000	316370000	374740000	304220000	400420000	358080000	370630000	361830000	396080000	382170000	422280000	310650000	396010000	331260000	291570000	122580000	306100000	339260000	374880000	580420000	543900000	515120000	523060000	437010000	541870000	511330000	536430000	488290000	556260000	577600000	588950000	569710000	639920000	740970000	629870000	611260000	630410000	485000000	505340000	413010000	545410000	525440000	484730000	440980000	528170000	484870000
XP_021462359.1	XP_021462359.1	XP_021462359.1 complement C5 [Oncorhynchus mykiss]	4562500000	4626400000	4762900000	4752100000	5028600000	4760200000	4777900000	5149700000	4652300000	4757800000	4567000000	4594400000	4894100000	5129700000	5036300000	4941100000	5687600000	4873500000	4569700000	4415200000	3962000000	4502400000	4225900000	4184800000	4520200000	3962200000	4409300000	5149600000	5446100000	5301700000	3798200000	4261300000	3892800000	3762000000	3948100000	3794800000	3542300000	4545800000	4663400000	4698300000	3595700000	4246100000	3506500000	3927300000	3907000000	4517300000	4424900000
XP_021462652.1	XP_021462652.1	XP_021462652.1 prothrombin [Oncorhynchus mykiss]	2739800000	2336300000	2352700000	2535200000	2472400000	2479000000	2571000000	2355200000	2616000000	2308700000	2938800000	2597000000	2391400000	2462000000	2206000000	2259900000	594790000	2540000000	2895000000	2551800000	2515200000	2461900000	2227900000	2077600000	2056200000	2228600000	2282500000	2220900000	2203100000	2350500000	2527400000	2438000000	2269100000	2299600000	2702900000	2507300000	2290100000	2225500000	2315600000	2166000000	2044800000	2304600000	2341200000	2183000000	2151500000	2294000000	2225400000
XP_021462792.1;XP_021418079.1	XP_021462792.1	XP_021462792.1 B-cadherin-like [Oncorhynchus mykiss]	316320000	283010000	262330000	252170000	244910000	220160000	217920000	235180000	230000000	258390000	464630000	486220000	436990000	445990000	422790000	345870000	491730000	419500000	427210000	421220000	675080000	659620000	594090000	528760000	507720000	476300000	476440000	435610000	409110000	333930000	766560000	705600000	679150000	636920000	670980000	689550000	621590000	806490000	683880000	513000000	672220000	638390000	647250000	598630000	557020000	588110000	572220000
XP_021462825.1	XP_021462825.1	XP_021462825.1 haptoglobin [Oncorhynchus mykiss]	34403000	66740000	78746000	105800000	155190000	94870000	96397000	77313000	46592000	88473000	19382000	68351000	67760000	119600000	148570000	59798000	73349000	35785000	30386000	64734000	21889000	78581000	29378000	110900000	92111000	116620000	81928000	229880000	143100000	286550000	13503000	159370000	26886000	34669000	23268000	17723000	15843000	27748000	19804000	64039000	20311000	148340000	51564000	45858000	35385000	47825000	41339000
XP_021462925.1;XP_021462924.1;XP_021462923.1;XP_021441765.1	XP_021462925.1;XP_021462924.1;XP_021462923.1;XP_021441765.1	XP_021462925.1 pyruvate kinase PKM-like isoform X3 [Oncorhynchus mykiss];XP_021462924.1 pyruvate kinase PKM-like isoform X2 [Oncorhynchus mykiss];XP_021462923.1 pyruvate kinase PKM-like isoform X1 [Oncorhynchus mykiss];XP_021441765.1 pyruvate kinase PKM-like [Oncorhynchus mykiss]	0	0	0	0	0	0	0	0	0	0	0	0	0	0	0	0	0	0	0	0	0	0	0	0	0	0	0	0	0	0	0	0	0	0	0	0	0	0	0	0	0	1489700	0	0	0	0	0
XP_021463596.1;XP_021462400.1	XP_021463596.1;XP_021462400.1	XP_021463596.1 transaldolase-like [Oncorhynchus mykiss];XP_021462400.1 transaldolase-like [Oncorhynchus mykiss]	18271000	18165000	22131000	35341000	43597000	41510000	30400000	36870000	43397000	46644000	13593000	15520000	19143000	29543000	31845000	26157000	9228100	27015000	29835000	31051000	13797000	17493000	19678000	26280000	36427000	27466000	27201000	40929000	46285000	50398000	15677000	24642000	27323000	28392000	29602000	34236000	21916000	34878000	37710000	39220000	21924000	19567000	16659000	23995000	25718000	24615000	22030000
XP_021463623.1	XP_021463623.1	XP_021463623.1 fibrillin-1-like [Oncorhynchus mykiss]	0	0	0	0	0	0	0	0	0	0	0	0	0	0	0	0	0	0	0	0	0	4286700	3690600	0	0	0	0	1777600	0	0	3638500	3319400	0	0	0	0	0	3621800	0	0	3972800	0	0	0	0	0	0
XP_021463740.1	XP_021463740.1	XP_021463740.1 aminopeptidase N-like [Oncorhynchus mykiss]	0	4796400	4633000	0	4384200	0	5081200	0	5041000	0	6348800	5739300	4706800	5665900	5959900	5366600	7628900	6671400	6431700	5782600	5402600	3319100	6673600	5209400	7867200	3887200	3557900	3993400	0	0	3580400	0	3473000	0	5194600	0	4757000	5123900	4274200	5494500	6102200	6730500	5422100	5054600	9297700	6138800	4951900
XP_021463979.1;XP_021463978.1;XP_021463974.1	XP_021463979.1;XP_021463978.1;XP_021463974.1	XP_021463979.1 exosome complex exonuclease RRP44-like isoform X2 [Oncorhynchus mykiss];XP_021463978.1 exosome complex exonuclease RRP44-like isoform X1 [Oncorhynchus mykiss];XP_021463974.1 exosome complex exonuclease RRP44-like [Oncorhynchus mykiss]	0	0	0	0	0	0	0	0	0	0	0	0	0	0	0	0	0	0	0	0	0	0	0	0	0	0	0	0	0	0	0	0	0	0	0	0	0	0	0	0	0	0	0	0	0	0	0
XP_021464035.1;XP_021464034.1;XP_021464033.1;XP_021464032.1	XP_021464035.1;XP_021464034.1;XP_021464033.1;XP_021464032.1	XP_021464035.1 vitamin K-dependent protein Z-like [Oncorhynchus mykiss];XP_021464034.1 vitamin K-dependent protein Z-like [Oncorhynchus mykiss];XP_021464033.1 vitamin K-dependent protein Z-like [Oncorhynchus mykiss];XP_021464032.1 vitamin K-dependent protein Z-like [Oncorhynchus mykiss]	40701000	22957000	19062000	32434000	40671000	17622000	28769000	33503000	43165000	34844000	67833000	25555000	43826000	33675000	20697000	34869000	20850000	38989000	61671000	35053000	38415000	40088000	37724000	33213000	40320000	26513000	24272000	28352000	25417000	28025000	36613000	36320000	38162000	36909000	39408000	41564000	26805000	34727000	36616000	39682000	20471000	28842000	25450000	26676000	38015000	23335000	22962000
XP_021464059.1;XP_021466542.1;XP_021450969.1;XP_021450206.1;XP_021450395.1;XP_021449230.1;XP_021466540.1;XP_021435517.1	XP_021464059.1;XP_021466542.1	XP_021464059.1 fibronectin [Oncorhynchus mykiss];XP_021466542.1 fibronectin-like [Oncorhynchus mykiss]	3147100000	3125800000	2929100000	2876300000	2966500000	3385500000	2961800000	3081100000	2907200000	2774600000	2246700000	1946600000	2154900000	2290500000	2604700000	2591800000	3197000000	2119200000	2004200000	2164600000	2440800000	2557200000	2053200000	2145500000	1858100000	2345200000	2200700000	2223500000	2312100000	2306400000	2340700000	2567600000	2282400000	2532100000	3190200000	2918900000	2252000000	2502800000	2482100000	2249200000	1640900000	2088900000	1937500000	1876400000	2058800000	1803600000	1715400000
XP_021464204.1;XP_021464205.1;XP_021464208.1;XP_021464206.1;XP_021426677.1;XP_021426686.1;XP_021426684.1;XP_021426683.1;XP_021426682.1;XP_021426681.1;XP_021426685.1;XP_021464216.1;XP_021464215.1;XP_021464214.1;XP_021464213.1;XP_021464212.1;XP_021464211.1;XP_021464210.1;XP_021464209.1;XP_021466568.1	XP_021464204.1;XP_021464205.1;XP_021464208.1;XP_021464206.1	XP_021464204.1 uncharacterized protein LOC110527330 isoform X1 [Oncorhynchus mykiss];XP_021464205.1 uncharacterized protein LOC110527330 isoform X2 [Oncorhynchus mykiss];XP_021464208.1 uncharacterized protein LOC110527330 isoform X4 [Oncorhynchus mykiss];XP_021464206.1 uncharacterized protein LOC110527330 isoform X3 [Oncorhynchus mykiss]	659900000	630910000	647360000	562650000	575160000	482150000	480130000	482290000	485380000	502290000	1563200000	1378100000	1457200000	1267100000	1285600000	1328700000	1737600000	1339200000	1473300000	1398000000	1539500000	1535500000	1373100000	1278300000	1307200000	1008800000	1105000000	1019000000	959180000	810570000	698110000	622740000	644460000	579000000	581870000	668460000	544450000	701640000	690670000	486110000	1453600000	1412300000	1253200000	1188400000	1202500000	1160700000	1111900000
XP_021464280.1;XP_021464279.1;XP_021464278.1;XP_021464277.1	XP_021464280.1;XP_021464279.1;XP_021464278.1;XP_021464277.1	XP_021464280.1 polypyrimidine tract-binding protein 1-like isoform X2 [Oncorhynchus mykiss];XP_021464279.1 polypyrimidine tract-binding protein 1-like isoform X1 [Oncorhynchus mykiss];XP_021464278.1 polypyrimidine tract-binding protein 1-like isoform X2 [Oncorhynchus mykiss];XP_021464277.1 polypyrimidine tract-binding protein 1-like isoform X1 [Oncorhynchus mykiss]	0	0	0	0	0	0	0	0	0	0	0	0	0	0	0	0	0	0	0	0	0	0	0	0	0	0	0	0	0	0	0	0	0	0	0	0	0	0	0	0	2521800	0	0	0	0	0	0
XP_021464322.1	XP_021464322.1	XP_021464322.1 hemopexin [Oncorhynchus mykiss]	12298000000	11364000000	12127000000	11609000000	11349000000	11109000000	11318000000	11830000000	11484000000	11644000000	10831000000	12548000000	11793000000	11935000000	12439000000	11245000000	16879000000	12633000000	11982000000	11992000000	11215000000	11241000000	9984100000	10255000000	10578000000	11427000000	12132000000	11568000000	12276000000	13156000000	11727000000	11986000000	11326000000	10760000000	11459000000	11370000000	11838000000	10518000000	11502000000	9160900000	10716000000	10917000000	11320000000	10889000000	9840100000	11086000000	10615000000
XP_021464347.1;XP_021464346.1	XP_021464347.1;XP_021464346.1	XP_021464347.1 cathepsin K isoform X2 [Oncorhynchus mykiss];XP_021464346.1 cathepsin K isoform X1 [Oncorhynchus mykiss]	4061700000	3992100000	3881000000	3860500000	3372200000	3285500000	3097300000	3240900000	2807800000	2857800000	2438500000	2624000000	2255400000	2503800000	2478600000	2216600000	0	2269600000	2078400000	2095600000	3298700000	3304000000	3000300000	2780700000	2397300000	2522800000	2650300000	1931400000	1699300000	1931500000	3012400000	2655100000	2692000000	2616200000	2861800000	3078700000	2841200000	2546700000	2571200000	2123500000	2333800000	2113300000	2346800000	2461600000	2080900000	2446600000	2414300000
XP_021464991.1;XP_021425606.1	XP_021464991.1	XP_021464991.1 GDH/6PGL endoplasmic bifunctional protein-like [Oncorhynchus mykiss]	0	1777400	2915400	3564200	3054200	2982700	3674700	2653400	3341400	7671800	5352600	8374100	7245500	5358900	8486400	10655000	22138000	7140300	9673000	19488000	12246000	7791100	13224000	6213700	11465000	8835800	7038200	12462000	8629400	15811000	1844400	2576500	5000000	2961200	3830200	5569900	5925600	2817400	0	4457300	1375400	2585600	0	0	2447000	3866700	0
XP_021465005.1	XP_021465005.1	XP_021465005.1 hepatocyte growth factor-like protein [Oncorhynchus mykiss]	53085000	50024000	59050000	56509000	68019000	65804000	65392000	68580000	62350000	61828000	53502000	45013000	51868000	56853000	54151000	70075000	82796000	59098000	51116000	54438000	57462000	68893000	60600000	61027000	59485000	70084000	72686000	73184000	80179000	88242000	71484000	79480000	79513000	71011000	74766000	72796000	74814000	75863000	77280000	66616000	51063000	62372000	75910000	72964000	56781000	74872000	70316000
XP_021465270.1;XP_021465271.1	XP_021465270.1;XP_021465271.1	XP_021465270.1 inter-alpha-trypsin inhibitor heavy chain H3-like isoform X1 [Oncorhynchus mykiss];XP_021465271.1 inter-alpha-trypsin inhibitor heavy chain H3-like isoform X2 [Oncorhynchus mykiss]	229360000	208110000	212820000	215150000	245430000	252820000	251360000	222670000	187350000	220460000	84306000	85055000	86329000	111200000	137630000	112110000	91805000	87569000	90503000	129410000	215700000	268260000	233920000	237500000	273020000	233370000	223520000	232670000	238740000	225510000	193930000	223470000	215060000	228770000	312620000	240470000	184660000	184130000	207220000	208880000	212490000	298050000	286650000	236910000	265340000	236630000	212190000
XP_021465605.1;XP_021424955.1	XP_021465605.1;XP_021424955.1	XP_021465605.1 uncharacterized protein LOC110528111 [Oncorhynchus mykiss];XP_021424955.1 uncharacterized protein LOC110494322 [Oncorhynchus mykiss]	12436000	16219000	12266000	0	8644500	12563000	8977500	2742500	2671500	2530200	2095800	2290100	1719100	1615800	1926600	0	0	0	1632800	2100200	7230300	6507000	12795000	8115800	8780100	11669000	35342000	34769000	22760000	18993000	15932000	9516600	15873000	22008000	37987000	18089000	24463000	29034000	15777000	21194000	11211000	13713000	23743000	28008000	40716000	24824000	19887000
XP_021466163.1;XP_021466164.1;XP_021466166.1;XP_021466165.1;XP_021466167.1	XP_021466163.1;XP_021466164.1;XP_021466166.1;XP_021466165.1;XP_021466167.1	XP_021466163.1 inter-alpha-trypsin inhibitor heavy chain H4-like isoform X1 [Oncorhynchus mykiss];XP_021466164.1 inter-alpha-trypsin inhibitor heavy chain H4-like isoform X2 [Oncorhynchus mykiss];XP_021466166.1 inter-alpha-trypsin inhibitor heavy chain H3-like isoform X4 [Oncorhynchus mykiss];XP_021466165.1 inter-alpha-trypsin inhibitor heavy chain H3-like isoform X3 [Oncorhynchus mykiss];XP_0214…	568350000	521430000	519810000	517360000	449380000	433580000	412720000	486050000	507410000	525660000	530770000	584900000	555800000	572920000	464410000	427400000	455760000	497870000	569020000	558700000	807310000	774700000	788260000	694710000	641050000	601960000	669210000	656830000	682000000	688030000	775570000	688200000	691350000	684740000	655980000	660520000	747310000	736220000	759930000	588600000	933510000	761390000	946270000	933640000	869540000	896420000	891300000
XP_021466412.1;XP_021466411.1;XP_021466410.1	XP_021466412.1;XP_021466411.1;XP_021466410.1	XP_021466412.1 uncharacterized protein LOC110528604 isoform X3 [Oncorhynchus mykiss];XP_021466411.1 uncharacterized protein LOC110528604 isoform X2 [Oncorhynchus mykiss];XP_021466410.1 uncharacterized protein LOC110528604 isoform X1 [Oncorhynchus mykiss]	0	0	0	0	0	0	0	0	0	0	0	0	0	0	0	0	0	0	0	0	0	0	0	0	0	0	0	0	0	0	0	0	0	0	0	0	3919900	0	0	0	0	0	0	0	0	0	0
XP_021466629.1	XP_021466629.1	XP_021466629.1 neuropilin-2 [Oncorhynchus mykiss]	36143000	32966000	29802000	23319000	24330000	29698000	34237000	40653000	30548000	28716000	34646000	22739000	23572000	20572000	18426000	23686000	25887000	34144000	33031000	26952000	32436000	32867000	22625000	19026000	24112000	20109000	26768000	25976000	28220000	18243000	31220000	24924000	20651000	19802000	25794000	29618000	32156000	48571000	35693000	21900000	39430000	33550000	31765000	27773000	25797000	32057000	33213000
XP_021466740.1;XP_021466739.1;XP_021466737.1;XP_021466736.1;XP_021466735.1;XP_021466734.1	XP_021466740.1;XP_021466739.1;XP_021466737.1;XP_021466736.1;XP_021466735.1;XP_021466734.1	XP_021466740.1 uncharacterized protein LOC110528885 isoform X6 [Oncorhynchus mykiss];XP_021466739.1 uncharacterized protein LOC110528885 isoform X5 [Oncorhynchus mykiss];XP_021466737.1 uncharacterized protein LOC110528885 isoform X4 [Oncorhynchus mykiss];XP_021466736.1 myosin-7B-like isoform X3 [Oncorhynchus mykiss];XP_021466735.1 myosin-7B-like isoform X2 [Oncorhynchus mykiss];XP_021466734.1 myo…	0	0	0	0	0	0	0	0	0	0	0	0	0	0	0	0	0	0	0	0	0	0	0	0	0	0	0	0	0	0	0	0	0	0	0	0	0	0	0	0	0	0	0	0	0	0	0
XP_021466807.1	XP_021466807.1	XP_021466807.1 multiple inositol polyphosphate phosphatase 1-like [Oncorhynchus mykiss]	40373000	34479000	38452000	41316000	40348000	35707000	32494000	30758000	31111000	34226000	38941000	35668000	31014000	32753000	35915000	34648000	28728000	28228000	29395000	32966000	40947000	41941000	36229000	39078000	36860000	36408000	31917000	30787000	31471000	37102000	33674000	37787000	37907000	37653000	45135000	43925000	46284000	50995000	35150000	35366000	28456000	31866000	35818000	37433000	37799000	38894000	37093000
XP_021466853.1;XP_021424131.1;XP_021424130.1;XP_021424129.1	XP_021466853.1	XP_021466853.1 phospholipid transfer protein [Oncorhynchus mykiss]	38942000	34351000	30376000	31392000	33166000	29209000	23254000	26415000	28975000	26742000	13967000	16523000	16654000	16586000	18544000	16682000	5743100	21962000	23744000	21405000	24187000	21257000	24236000	19553000	25542000	25604000	25643000	22607000	24303000	23157000	38344000	30086000	41049000	42359000	37098000	38762000	59744000	56428000	44572000	35428000	26725000	35640000	42846000	37111000	33906000	51873000	40099000
XP_021467147.1	XP_021467147.1	XP_021467147.1 uncharacterized protein LOC110529338 [Oncorhynchus mykiss]	113970000	126190000	120480000	86176000	82334000	96031000	94820000	93999000	103580000	90685000	109160000	126670000	115960000	86087000	97165000	91277000	139270000	82547000	105070000	88695000	129780000	163510000	127470000	104010000	84306000	77122000	107030000	142140000	168270000	145250000	119270000	156620000	133290000	110840000	105900000	116270000	93629000	115750000	117700000	116050000	134440000	162570000	143010000	135420000	120790000	109370000	103090000
XP_021467158.1;XP_021467157.1	XP_021467158.1;XP_021467157.1	XP_021467158.1 complement C1q-like protein 2 isoform X2 [Oncorhynchus mykiss];XP_021467157.1 complement C1q-like protein 2 isoform X1 [Oncorhynchus mykiss]	41302000	42580000	51729000	100440000	151950000	168270000	181160000	169950000	126760000	124290000	95240000	126970000	195360000	259880000	340940000	329230000	393380000	303520000	272820000	250230000	85174000	111960000	97067000	155130000	232260000	201400000	226220000	275220000	307720000	286090000	138350000	188840000	185240000	199090000	225630000	206740000	108790000	170310000	147770000	152800000	86451000	151280000	125490000	135440000	145920000	141660000	132320000
XP_021467168.1	XP_021467168.1	XP_021467168.1 papilin-like [Oncorhynchus mykiss]	0	0	0	0	0	0	0	0	0	0	0	0	0	0	0	0	0	0	0	0	0	0	0	0	0	0	0	0	0	0	0	0	0	0	0	0	0	0	0	0	0	0	0	0	0	0	0
XP_021467189.1	XP_021467189.1	XP_021467189.1 leucine-rich alpha-2-glycoprotein-like [Oncorhynchus mykiss]	3801300	5805200	5997700	7822500	12775000	12179000	15078000	14241000	14189000	14409000	12211000	18999000	18883000	20585000	32806000	22988000	27402000	27010000	31654000	26435000	11043000	12308000	11746000	17183000	23960000	31663000	29289000	45182000	44997000	47863000	19258000	22964000	29122000	23607000	21447000	19760000	24246000	25760000	20596000	18652000	13845000	21622000	20933000	15382000	21909000	24420000	23162000
XP_021467190.1	XP_021467190.1	XP_021467190.1 leucine-rich alpha-2-glycoprotein-like [Oncorhynchus mykiss]	222560000	193600000	195920000	200220000	232040000	227900000	217140000	235600000	196800000	214220000	257120000	218990000	226710000	245270000	262510000	256830000	394680000	303900000	252050000	251850000	164980000	196710000	156950000	177790000	226940000	195860000	210050000	231120000	244430000	247390000	165500000	182810000	177360000	177250000	218740000	206910000	181590000	206140000	203920000	164670000	178320000	199750000	160600000	160720000	181150000	171440000	175060000
XP_021467200.1;XP_021467197.1;XP_021467198.1	XP_021467200.1;XP_021467197.1;XP_021467198.1	XP_021467200.1 apolipoprotein B-100-like isoform X3 [Oncorhynchus mykiss];XP_021467197.1 apolipoprotein B-100-like isoform X1 [Oncorhynchus mykiss];XP_021467198.1 apolipoprotein B-100-like isoform X2 [Oncorhynchus mykiss]	739450000	624230000	637180000	561170000	518340000	448290000	426950000	439520000	531670000	556500000	715460000	646330000	587490000	662350000	457000000	468940000	583040000	533250000	600310000	676510000	501670000	346400000	526270000	372120000	449120000	282820000	278870000	128440000	145410000	99863000	377190000	292180000	418680000	422450000	412120000	433310000	421480000	425310000	351210000	421080000	479000000	439280000	501690000	503560000	848200000	551020000	452250000
XP_021467201.1;XP_021467203.1;XP_021467204.1;XP_021451370.1;XP_021449302.1	XP_021467201.1;XP_021467203.1	XP_021467201.1 apolipoprotein B-100-like [Oncorhynchus mykiss];XP_021467203.1 apolipoprotein B-100-like [Oncorhynchus mykiss]	22300000000	18643000000	19355000000	18937000000	16327000000	15394000000	13668000000	14057000000	17298000000	18529000000	23749000000	21425000000	20692000000	20118000000	17261000000	17251000000	22043000000	19957000000	21490000000	22443000000	14608000000	11310000000	18145000000	14495000000	16424000000	9850100000	8856700000	4128700000	5239000000	3728800000	17671000000	11039000000	15793000000	16334000000	15782000000	16772000000	14532000000	17640000000	15226000000	17043000000	18763000000	12983000000	14086000000	15272000000	27413000000	14198000000	12746000000
XP_021467202.1	XP_021467202.1	XP_021467202.1 apolipoprotein B-100-like [Oncorhynchus mykiss]	462300000	236680000	501080000	597310000	496070000	587000000	391640000	293000000	482920000	736180000	1317800000	484080000	882030000	774540000	736030000	715320000	586600000	566360000	753940000	923690000	623170000	350030000	1966100000	1564100000	1791700000	1263500000	255990000	178980000	370160000	277090000	708020000	269180000	771800000	1407500000	1069100000	739120000	362780000	352810000	1090700000	2665800000	912820000	206540000	254010000	698840000	2288500000	244570000	440970000
XP_021467480.1	XP_021467480.1	XP_021467480.1 protein LEG1 homolog [Oncorhynchus mykiss]	233980000	256440000	239080000	223360000	250910000	265600000	268290000	260320000	238600000	280820000	654890000	741420000	707190000	812190000	943880000	947190000	442610000	909140000	825300000	979530000	760390000	737710000	733520000	831370000	926690000	843560000	770270000	817200000	851810000	1056700000	730820000	805460000	858290000	761340000	898370000	909990000	716510000	830230000	859380000	716040000	500870000	792720000	641910000	661050000	706560000	749990000	718260000
XP_021467598.1	XP_021467598.1	XP_021467598.1 DNA helicase MCM9-like [Oncorhynchus mykiss]	0	0	0	0	0	0	0	0	0	0	0	0	0	0	0	0	0	0	0	0	0	0	0	0	0	0	0	0	0	0	0	0	0	0	0	0	0	0	0	0	0	0	0	0	0	0	0
XP_021467625.1	XP_021467625.1	XP_021467625.1 plasminogen-like [Oncorhynchus mykiss]	750900000	686800000	608350000	554850000	577630000	575600000	573960000	580360000	554000000	533260000	735460000	649250000	607780000	597900000	595310000	576980000	816980000	615110000	619050000	562140000	703320000	722550000	578410000	577400000	542090000	565370000	586150000	600820000	596510000	546580000	703310000	668880000	631210000	589040000	663500000	634570000	610130000	586350000	635820000	505150000	729860000	851140000	843580000	795450000	721050000	730980000	761950000
XP_021467760.1;XP_021467759.1	XP_021467760.1;XP_021467759.1	XP_021467760.1 CD2-associated protein-like isoform X2 [Oncorhynchus mykiss];XP_021467759.1 CD2-associated protein-like isoform X1 [Oncorhynchus mykiss]	0	0	0	0	0	0	0	0	0	0	0	0	0	0	0	0	0	0	0	0	0	0	0	0	0	0	0	0	0	0	0	0	0	0	0	0	0	0	0	0	0	0	0	0	0	0	0
XP_021467878.1	XP_021467878.1	XP_021467878.1 protein Z-dependent protease inhibitor-like [Oncorhynchus mykiss]	10850000	10761000	11971000	10030000	10284000	9506800	8052100	8680400	10000000	9991000	10288000	11071000	11078000	8373800	11214000	9310100	14599000	11675000	13496000	12281000	10603000	8378400	8415300	7171900	6290600	6039700	5865400	5593500	6206700	5979500	12158000	11539000	14546000	13236000	16206000	13812000	11798000	12712000	10628000	7757600	11627000	12038000	10032000	8751400	9861000	10042000	7608300
XP_021468321.1	XP_021468321.1	XP_021468321.1 vitamin K-dependent protein C [Oncorhynchus mykiss]	383550000	215480000	225500000	361280000	437650000	249970000	356460000	385150000	517410000	401800000	637080000	308930000	379470000	410770000	253810000	374730000	93283000	431910000	657820000	423640000	479870000	433990000	425840000	390890000	404140000	358510000	353150000	357610000	391460000	372390000	428400000	380890000	392550000	366740000	465960000	409370000	383360000	471010000	424040000	381840000	311220000	331010000	336200000	331380000	353890000	348880000	344370000
XP_021468596.1;XP_021445540.1;XP_021460111.1	XP_021468596.1	XP_021468596.1 gelsolin-like [Oncorhynchus mykiss]	0	0	8406600	14531000	12007000	8625100	5742600	8225500	8340300	8220600	0	0	0	10876000	0	12862000	0	0	8955300	0	0	0	0	8493900	8206300	5503100	5261200	9440800	7645900	10292000	0	9324800	6782300	8104800	7475800	0	0	6192000	8138700	9820000	8323000	6148200	0	7879400	0	5810500	4839200
XP_021468689.1	XP_021468689.1	XP_021468689.1 uncharacterized protein LOC110530163 isoform X1 [Oncorhynchus mykiss]	0	0	0	0	0	0	0	0	0	0	0	0	0	0	0	0	0	0	0	0	3041500	6057600	3634800	0	0	4298800	0	3807700	0	0	0	0	3840200	0	0	0	2873100	0	0	0	0	0	8557100	0	0	0	0
XP_021468961.1;XP_021468960.1	XP_021468961.1;XP_021468960.1	XP_021468961.1 selenoprotein Pb-like [Oncorhynchus mykiss];XP_021468960.1 selenoprotein Pb-like [Oncorhynchus mykiss]	14687000	15597000	14115000	13162000	13187000	14637000	12714000	11973000	16303000	14131000	21072000	16246000	13621000	0	17761000	0	0	15653000	0	10523000	20091000	20837000	17761000	15255000	10028000	13035000	12159000	12175000	12405000	13459000	20143000	16673000	21201000	22348000	22693000	22410000	18527000	22059000	20376000	14927000	13427000	12003000	11810000	12102000	13622000	11213000	11635000
XP_021468984.1;XP_021468983.1;XP_021468982.1;XP_021468981.1	XP_021468984.1;XP_021468983.1;XP_021468982.1;XP_021468981.1	XP_021468984.1 uncharacterized protein LOC110530338 [Oncorhynchus mykiss];XP_021468983.1 uncharacterized protein LOC110530338 [Oncorhynchus mykiss];XP_021468982.1 uncharacterized protein LOC110530338 [Oncorhynchus mykiss];XP_021468981.1 uncharacterized protein LOC110530338 [Oncorhynchus mykiss]	0	0	0	0	0	0	0	0	0	0	0	0	0	0	0	0	0	0	0	0	0	0	0	0	0	0	0	0	0	0	0	0	0	0	0	0	0	0	0	0	0	0	0	0	0	0	0
XP_021469363.1	XP_021469363.1	XP_021469363.1 myocilin-like [Oncorhynchus mykiss]	0	0	0	0	0	0	0	0	0	0	0	0	0	0	0	0	0	0	0	0	0	0	0	0	0	0	0	0	0	0	0	0	0	0	0	0	9747300	0	0	0	0	0	0	0	0	0	0
XP_021469459.1;XP_021469460.1	XP_021469459.1;XP_021469460.1	XP_021469459.1 complement C3-like isoform X1 [Oncorhynchus mykiss];XP_021469460.1 complement C3-like isoform X2 [Oncorhynchus mykiss]	1592200000	2584600000	2622800000	2974400000	3699800000	3531200000	3516200000	3634300000	3367900000	3521400000	1200100000	1807200000	2284700000	2455800000	3067300000	2838900000	3654200000	2457800000	2333600000	2290700000	1517300000	2036200000	1875600000	2268200000	3230100000	2922600000	3130900000	4186300000	4838700000	4705500000	2606100000	3072200000	2865000000	2871300000	3031500000	3038500000	2682700000	2908400000	3016100000	3163200000	2310700000	3041000000	3471400000	3648600000	3668500000	3618200000	3466100000
XP_021469486.1;XP_021469484.1;XP_021469485.1	XP_021469486.1;XP_021469484.1;XP_021469485.1	XP_021469486.1 putative leucine-rich repeat-containing protein DDB_G0290503 isoform X3 [Oncorhynchus mykiss];XP_021469484.1 putative leucine-rich repeat-containing protein DDB_G0290503 isoform X1 [Oncorhynchus mykiss];>XP_021469485.1 putative leucine-rich repeat-containing protein DDB_G0290503 isoform X2 [Oncorhynchus mykiss]	10017000000	12852000000	12823000000	11704000000	11547000000	11437000000	12814000000	13165000000	11048000000	11973000000	10266000000	13649000000	14136000000	13867000000	13907000000	13733000000	15418000000	11581000000	10262000000	10015000000	10040000000	12831000000	11549000000	13213000000	14135000000	10854000000	11120000000	12813000000	13867000000	12649000000	10303000000	10964000000	9639600000	10125000000	10438000000	10508000000	8349800000	10720000000	12204000000	15362000000	7797800000	11320000000	9261400000	9043700000	9742600000	9974700000	8469800000
XP_021469499.1	XP_021469499.1	XP_021469499.1 catechol O-methyltransferase domain-containing protein 1-like [Oncorhynchus mykiss]	5687400	23065000	36449000	76369000	210700000	215890000	279220000	284500000	183900000	128100000	49812000	99680000	195600000	302470000	503290000	465200000	647190000	486470000	416960000	305830000	186580000	330440000	269990000	510140000	1100100000	1721600000	1733400000	1771600000	2072700000	2480700000	486670000	926430000	982030000	978990000	1050000000	899570000	622220000	702940000	490630000	531850000	133700000	248670000	243480000	271870000	295090000	314000000	295710000
XP_021469936.1;XP_021444809.1;XP_021475858.1	XP_021469936.1;XP_021444809.1	XP_021469936.1 epidermal growth factor receptor-like [Oncorhynchus mykiss];XP_021444809.1 epidermal growth factor receptor-like [Oncorhynchus mykiss]	0	0	0	0	0	0	0	0	0	0	0	0	0	0	0	0	0	0	0	0	7161800	8615900	6352400	5051800	5090600	4169800	4411900	4617300	4397700	3004200	5873400	5865200	7365300	5115700	5597600	6772800	4397500	6741100	5318700	4175000	8006300	6749600	6264800	4797200	4310700	4283400	4528200
XP_021470180.1;XP_021422843.1	XP_021470180.1;XP_021422843.1	XP_021470180.1 transketolase-like [Oncorhynchus mykiss];XP_021422843.1 transketolase-like [Oncorhynchus mykiss]	0	0	0	0	0	0	0	0	0	0	0	0	0	4682600	0	4730000	0	0	0	5238300	0	0	0	6375200	6595800	4217200	5329300	10207000	8652100	10068000	0	4222000	0	5334500	0	0	0	3705200	4284700	5659600	5836700	4034700	0	0	3311000	3400200	0
XP_021470203.1;XP_021477882.1;XP_021449135.1	XP_021470203.1;XP_021477882.1	XP_021470203.1 fibrinogen alpha chain-like [Oncorhynchus mykiss];XP_021477882.1 fibrinogen alpha chain-like, partial [Oncorhynchus mykiss]	3519300000	4971300000	3886700000	3741400000	2951600000	3679200000	4066300000	3650300000	5188900000	3079500000	2001600000	2672800000	2279100000	2508800000	2906200000	2540300000	779790000	2955000000	3650100000	3191400000	7567400000	6596800000	6033800000	5408200000	4083600000	6059100000	5797900000	5374800000	3996000000	5263300000	5640200000	4583200000	4255000000	4195000000	4778500000	4950700000	5658700000	4205100000	4366000000	4446800000	3753600000	2910200000	4024500000	3910000000	3465000000	5385700000	5330400000
XP_021470204.1	XP_021470204.1	XP_021470204.1 fibrinogen beta chain [Oncorhynchus mykiss]	9175200000	8823200000	7590400000	6519300000	5885400000	6792400000	8077900000	7226700000	7988100000	6920200000	8052000000	6463100000	6574400000	5879500000	5991300000	6715700000	10014000000	6732900000	7350900000	6936600000	12224000000	10770000000	8623000000	7642200000	5891600000	9269500000	9147900000	7721000000	5978400000	8386700000	8915100000	7030400000	6764600000	6222500000	7542000000	7830100000	9518000000	7824600000	6906500000	6540800000	5650600000	5884100000	6618700000	6618700000	5366700000	9021300000	9499600000
XP_021470329.1	XP_021470329.1	XP_021470329.1 serum albumin 1 [Oncorhynchus mykiss]	12787000000	12113000000	12039000000	11463000000	10167000000	10119000000	10569000000	10123000000	11138000000	11781000000	18549000000	16123000000	15695000000	14774000000	14213000000	14198000000	21585000000	16035000000	17476000000	14714000000	12480000000	14699000000	12030000000	11010000000	10600000000	8446400000	9419500000	9944800000	8233200000	7602300000	12883000000	11990000000	9712500000	9523300000	10144000000	10761000000	9064300000	8899300000	13114000000	9877200000	17458000000	15863000000	13436000000	13647000000	12274000000	10656000000	11982000000
XP_021470341.1;XP_021452040.1	XP_021470341.1	XP_021470341.1 serum albumin 1 [Oncorhynchus mykiss]	17398000000	17135000000	15497000000	14945000000	13024000000	12240000000	12970000000	12634000000	14913000000	15434000000	20663000000	20632000000	20194000000	19838000000	19810000000	18217000000	27133000000	17602000000	19429000000	18810000000	19408000000	19103000000	20737000000	19935000000	15815000000	15590000000	15023000000	13308000000	12511000000	12783000000	19399000000	16871000000	16434000000	14094000000	14221000000	13482000000	14354000000	15630000000	16402000000	14272000000	20191000000	18821000000	18325000000	17678000000	14164000000	15077000000	15041000000
XP_021470842.1	XP_021470842.1	XP_021470842.1 malate dehydrogenase, cytoplasmic-like [Oncorhynchus mykiss]	22372000	23036000	22141000	23559000	22327000	19080000	17992000	16869000	16128000	13321000	16022000	29869000	24406000	21068000	16876000	18685000	10589000	14420000	17761000	22885000	14385000	13259000	11031000	11961000	10428000	10099000	7964300	19648000	21182000	16018000	7493500	11963000	11843000	14032000	10717000	10010000	11170000	14405000	14115000	10268000	15908000	11604000	11006000	12800000	14642000	13625000	16328000
XP_021470969.1	XP_021470969.1	XP_021470969.1 ependymin-like [Oncorhynchus mykiss]	8505900	0	7607500	0	7289000	7543900	0	6975100	8068200	8043700	9418900	9419300	8379800	7712400	8158700	8732600	10132000	9664000	9772300	8974500	0	0	0	0	0	0	0	0	7011900	7077800	0	5043000	0	0	0	0	0	0	0	0	6871000	0	6363200	6018100	0	0	6500400
XP_021471021.1;XP_021471020.1;XP_021471019.1;XP_021471018.1;XP_021471017.1;XP_021471016.1;XP_021471015.1;XP_021471014.1	XP_021471021.1;XP_021471020.1;XP_021471019.1;XP_021471018.1;XP_021471017.1;XP_021471016.1;XP_021471015.1;XP_021471014.1	XP_021471021.1 calcium/calmodulin-dependent protein kinase type II delta chain isoform X8 [Oncorhynchus mykiss];XP_021471020.1 calcium/calmodulin-dependent protein kinase type II delta chain isoform X7 [Oncorhynchus mykiss];XP_021471019.1 calcium/calmodulin-dependent protein kinase type II subunit delta isoform X6 [Oncorhynchus mykiss];XP_021471018.1 calcium/calmodulin-dependent protein kinase ty…	0	0	0	0	0	0	0	0	0	0	0	0	0	0	0	0	0	0	0	0	0	0	0	0	0	0	0	0	0	0	0	0	0	0	0	0	0	0	0	0	0	0	0	0	0	0	0
XP_021471061.1	XP_021471061.1	XP_021471061.1 fibroleukin [Oncorhynchus mykiss]	0	0	0	0	0	0	0	0	0	0	0	0	0	0	0	0	0	0	0	0	8947100	5904100	4051700	0	0	0	0	0	0	0	6662500	5391400	2685400	0	0	0	0	0	0	0	8045400	6366700	4875300	4201300	4652900	3676700	4010200
XP_021471176.1;XP_021479576.1;XP_021472850.1;XP_021442570.1;XP_021442569.1;XP_021437758.1;XP_021437757.1;NP_001117941.1;XP_021467292.1;XP_021467291.1;XP_021424047.1;NP_001117940.1;NP_001117942.1;NP_001117949.1;NP_001117948.1;XP_021473068.1;NP_001117946.1;XP_021438211.1;XP_021460776.1;XP_021438652.1;XP_021430376.1;XP_021430375.1;XP_021430374.1;NP_001117943.1;NP_001117945.1;XP_021437756.1;XP_021479…	XP_021471176.1;XP_021479576.1;XP_021472850.1;XP_021442570.1;XP_021442569.1;XP_021437758.1;XP_021437757.1;NP_001117941.1;XP_021467292.1;XP_021467291.1;XP_021424047.1;NP_001117940.1;NP_001117942.1;NP_001117949.1;NP_001117948.1;XP_021473068.1;NP_001117946.1;XP_021438211.1;XP_021460776.1;XP_021438652.1;XP_021430376.1;XP_021430375.1;XP_021430374.1;NP_001117943.1;NP_001117945.1;XP_021437756.1;XP_021479…	XP_021471176.1 14-3-3 protein beta/alpha-2-like [Oncorhynchus mykiss];XP_021479576.1 14-3-3 protein epsilon isoform X2 [Oncorhynchus mykiss];XP_021472850.1 14-3-3E2 protein isoform X1 [Oncorhynchus mykiss];XP_021442570.1 14-3-3E1 protein isoform X2 [Oncorhynchus mykiss];XP_021442569.1 14-3-3E1 protein isoform X2 [Oncorhynchus mykiss];XP_021437758.1 14-3-3 protein epsilon-like isoform X3 [Oncorhyn…	0	0	0	0	0	0	0	1704000	0	0	0	0	0	0	0	2855100	0	0	0	0	0	0	0	0	0	0	0	0	0	0	0	0	0	0	0	0	0	0	0	0	14284000	0	0	0	0	2282700	1465200
XP_021471306.1;XP_021471305.1;XP_021420148.1	XP_021471306.1;XP_021471305.1;XP_021420148.1	XP_021471306.1 collagen alpha-1(II) chain-like isoform X2 [Oncorhynchus mykiss];XP_021471305.1 collagen alpha-1(II) chain-like isoform X1 [Oncorhynchus mykiss];XP_021420148.1 collagen alpha-1(II) chain-like [Oncorhynchus mykiss]	0	0	0	0	0	0	0	0	0	0	0	0	0	0	0	0	0	0	0	0	0	0	0	0	0	0	0	0	0	0	0	0	0	0	0	0	0	0	3081600	0	0	0	0	0	0	0	0
XP_021471522.1	XP_021471522.1	XP_021471522.1 intelectin [Oncorhynchus mykiss]	0	0	0	0	0	0	0	0	0	0	0	0	0	0	0	0	5054900	0	0	0	0	0	0	3836500	11068000	9952700	7920300	17102000	11749000	17782000	5015600	29105000	18547000	17016000	15464000	12637000	5159600	9123700	6156500	5797500	0	4785300	1516200	0	0	0	0
XP_021471790.1;XP_021471789.1	XP_021471790.1;XP_021471789.1	XP_021471790.1 6-phosphogluconate dehydrogenase, decarboxylating isoform X2 [Oncorhynchus mykiss];XP_021471789.1 6-phosphogluconate dehydrogenase, decarboxylating isoform X1 [Oncorhynchus mykiss]	0	0	0	0	0	0	0	0	0	0	0	0	0	0	0	0	0	0	0	0	0	0	0	2710100	0	0	0	0	0	5091400	0	0	0	0	0	0	0	0	0	3426600	0	0	0	0	0	0	0
XP_021472253.1;XP_021472252.1;XP_021472251.1	XP_021472253.1;XP_021472252.1;XP_021472251.1	XP_021472253.1 cell wall protein 1-like isoform X3 [Oncorhynchus mykiss];XP_021472252.1 uncharacterized protein LOC110532569 isoform X2 [Oncorhynchus mykiss];XP_021472251.1 uncharacterized protein LOC110532569 isoform X1 [Oncorhynchus mykiss]	0	6020900	0	0	0	0	0	0	6074900	0	0	0	0	0	0	0	0	0	6898900	0	0	9501600	10737000	7572800	0	6719600	0	5458400	0	0	13277000	13375000	11676000	12275000	13059000	11847000	8886400	9948700	13606000	8633300	15196000	9520500	9539800	8195300	12651000	10190000	8440300
XP_021472488.1;XP_021420102.1	XP_021472488.1	XP_021472488.1 neural cell adhesion molecule L1-like [Oncorhynchus mykiss]	313390000	258290000	250240000	206130000	219720000	190740000	186780000	216310000	213500000	218250000	382780000	356470000	344630000	341140000	295570000	286780000	78797000	374870000	390140000	352920000	149770000	157370000	135510000	109940000	119530000	113120000	131410000	129570000	121580000	102150000	203280000	193130000	176310000	168490000	175030000	198050000	188400000	223150000	222650000	165250000	249430000	240180000	219240000	198700000	196190000	208260000	210340000
XP_021473109.1;XP_021473101.1;XP_021473092.1	XP_021473109.1;XP_021473101.1;XP_021473092.1	XP_021473109.1 FBPL4 isoform X3 [Oncorhynchus mykiss];XP_021473101.1 FBPL4 isoform X2 [Oncorhynchus mykiss];XP_021473092.1 FBPL4 isoform X1 [Oncorhynchus mykiss]	0	0	0	0	0	0	0	0	0	0	0	0	0	0	0	0	0	0	0	0	0	0	0	0	0	0	0	0	0	0	0	0	0	0	0	0	0	0	0	0	0	0	0	0	0	0	0
XP_021473429.1;XP_021479532.1;XP_021473430.1;XP_021440681.1	XP_021473429.1;XP_021479532.1;XP_021473430.1	XP_021473429.1 creatine kinase M-type isoform X1 [Oncorhynchus mykiss];XP_021479532.1 creatine kinase M-type-like [Oncorhynchus mykiss];XP_021473430.1 creatine kinase M-type isoform X2 [Oncorhynchus mykiss]	150360000	105540000	112750000	127160000	48196000	24280000	52459000	20596000	18093000	35193000	172800000	235180000	50651000	45704000	42521000	35880000	5763400	20315000	13250000	115610000	66076000	54169000	22140000	34584000	44966000	23007000	133030000	31324000	24690000	55608000	7974000	22140000	9939500	103970000	15235000	6930100	27350000	0	0	53320000	117070000	31551000	25135000	42580000	58589000	19336000	90306000
XP_021473834.1;XP_021479124.1;XP_021479123.1;XP_021479122.1	XP_021473834.1	XP_021473834.1 pigment epithelium-derived factor-like [Oncorhynchus mykiss]	90701000	69974000	72207000	60982000	67279000	72535000	60020000	71550000	66478000	65964000	82398000	69713000	63391000	57812000	65646000	77231000	44506000	65460000	68197000	62859000	85443000	93615000	72687000	60706000	81624000	61448000	69098000	77934000	73856000	75031000	93451000	79246000	83657000	86575000	91310000	94982000	90773000	104960000	89066000	78944000	95932000	90681000	74242000	71805000	83529000	73308000	74320000
XP_021478894.1;XP_021474046.1;XP_021439016.1;XP_021435035.1;XP_021453414.1;XP_021435034.1;XP_021464320.1;XP_021426859.1;XP_021426858.1;XP_021455767.1;XP_021455766.1;XP_021441080.1;XP_021435036.1;XP_021478895.1;XP_021474047.1;XP_021426860.1;XP_021467246.1	XP_021478894.1;XP_021474046.1;XP_021439016.1;XP_021435035.1;XP_021453414.1;XP_021435034.1;XP_021464320.1;XP_021426859.1;XP_021426858.1;XP_021455767.1;XP_021455766.1	XP_021478894.1 moesin isoform X1 [Oncorhynchus mykiss];XP_021474046.1 moesin-like isoform X1 [Oncorhynchus mykiss];XP_021439016.1 moesin-like [Oncorhynchus mykiss];XP_021435035.1 radixin-like isoform X2 [Oncorhynchus mykiss];XP_021453414.1 radixin [Oncorhynchus mykiss];XP_021435034.1 radixin-like isoform X1 [Oncorhynchus mykiss];XP_021464320.1 radixin-like [Oncorhynchus mykiss];XP_021426859.1 rad…	5164300	0	5074500	7496600	7044300	0	0	0	0	6204300	9348300	0	0	0	0	10798000	6530100	7591600	6556300	10295000	6616100	5181500	3924300	6104400	5347600	4813600	5867900	7421800	9256900	8264600	5426100	5761900	5839500	7702600	6358100	5943200	5483600	7712400	5789800	8193300	10405000	5191600	3620900	5657600	5458800	6773000	4967400
XP_021474428.1	XP_021474428.1	XP_021474428.1 lipocalin-like [Oncorhynchus mykiss]	28971000	20011000	11040000	0	0	0	17268000	0	15341000	0	24276000	22178000	23885000	19275000	12817000	20927000	30493000	16412000	26938000	20129000	16682000	19135000	16657000	8156900	9277800	10235000	18420000	13080000	15962000	9414300	23078000	20829000	21925000	16250000	15272000	25932000	24768000	27643000	26785000	16717000	23255000	20874000	17084000	11183000	15081000	14121000	18106000
XP_021474478.1;XP_021474477.1;XP_021433885.1;XP_021470971.1	XP_021474478.1;XP_021474477.1	XP_021474478.1 glycogen phosphorylase, muscle form-like [Oncorhynchus mykiss];XP_021474477.1 glycogen phosphorylase, muscle form-like [Oncorhynchus mykiss]	0	5168700	0	0	0	2635100	0	0	0	1663400	33703000	5123400	0	0	0	0	0	0	0	0	24387000	14337000	0	0	2158300	0	117070000	0	0	0	0	0	0	29484000	0	0	0	0	0	4021400	42277000	1959000	0	2587500	3377000	0	11614000
XP_021474489.1	XP_021474489.1	XP_021474489.1 complement factor B-like [Oncorhynchus mykiss]	1075100000	1634900000	1654500000	1484900000	2013300000	1867300000	2054100000	1918900000	1562800000	1478600000	1068200000	1624700000	1680300000	1756500000	2109100000	1942400000	2218800000	1580500000	1489900000	1324600000	1041600000	1522900000	1289200000	1402000000	1664800000	1725900000	1811800000	2305100000	2625700000	2604400000	1405100000	2167000000	1824000000	1547900000	1659100000	1603300000	1319200000	1430100000	1513400000	1513500000	1060700000	1979300000	1867200000	1751000000	1644000000	1556800000	1476300000
XP_021474523.1	XP_021474523.1	XP_021474523.1 coagulation factor IX-like [Oncorhynchus mykiss]	173430000	63389000	66645000	217750000	314800000	99367000	211350000	202510000	299150000	213090000	509870000	70386000	243750000	75026000	45237000	212910000	0	223090000	380680000	228970000	228140000	193670000	193290000	189870000	162540000	179180000	160150000	170190000	175360000	157990000	185800000	170460000	170580000	166870000	220750000	203240000	168340000	184860000	193590000	172810000	147620000	161780000	144970000	141240000	143000000	141380000	126420000
XP_021474674.1	XP_021474674.1	XP_021474674.1 histone H2AX [Oncorhynchus mykiss]	3949000	0	0	0	2703000	2542700	0	0	0	0	4234800	0	6827800	0	0	29140000	0	0	0	0	4804900	0	0	0	0	0	0	0	6204300	0	0	0	840400	0	0	0	8641900	0	0	0	33101000	0	0	0	0	10070000	2415000
XP_021474832.1;XP_021474831.1	XP_021474832.1;XP_021474831.1	XP_021474832.1 ecto-ADP-ribosyltransferase 4-like isoform X2 [Oncorhynchus mykiss];XP_021474831.1 ecto-ADP-ribosyltransferase 4-like isoform X1 [Oncorhynchus mykiss]	401860000	340040000	349960000	306890000	306510000	294310000	286790000	307220000	310450000	338970000	586280000	558220000	510890000	492050000	461400000	409550000	612150000	508840000	549830000	483990000	415950000	418390000	353040000	307550000	306790000	256030000	285780000	299690000	316510000	250690000	337410000	308250000	279080000	270650000	305020000	315050000	275290000	328070000	369100000	264570000	330280000	315840000	247040000	243210000	267640000	265720000	259450000
XP_021474939.1;XP_021429246.1	XP_021474939.1;XP_021429246.1	XP_021474939.1 acid ceramidase-like [Oncorhynchus mykiss];XP_021429246.1 acid ceramidase-like [Oncorhynchus mykiss]	2640600	1996800	0	2307700	0	2172700	0	0	1603500	1409900	0	0	0	0	0	0	0	0	0	0	1783200	1937100	1923900	1808600	1808800	1482800	1400400	1510100	1580900	1761800	4063300	4333100	4708300	4506400	2323900	3782300	3190300	3238300	2504900	1529100	2163900	1902800	1666400	1935800	2050400	1782900	1790900
XP_021474954.1	XP_021474954.1	XP_021474954.1 fibrinogen gamma chain-like [Oncorhynchus mykiss]	15872000000	14424000000	12558000000	10108000000	9200400000	9773600000	11194000000	10924000000	10848000000	10703000000	13071000000	10687000000	10051000000	9319500000	9966200000	10553000000	15840000000	10444000000	9389600000	9878600000	16508000000	14888000000	12162000000	10490000000	8248400000	11542000000	11810000000	10802000000	8815900000	10652000000	13244000000	10734000000	10063000000	9832100000	12792000000	12863000000	13469000000	12546000000	11024000000	9827000000	8121400000	9058800000	8454400000	8749400000	8268300000	12235000000	12188000000
XP_021475424.1	XP_021475424.1	XP_021475424.1 fibrinogen-like protein 1 [Oncorhynchus mykiss]	5641800	4274600	5579600	6469000	0	0	3215900	0	0	4048000	0	2503000	2990800	3217800	2954900	0	0	0	0	3434100	9018200	7391100	4975700	4853000	4014200	3341400	3469800	0	3265100	2891600	5742200	3521900	3913100	3185200	4490800	3999800	5570700	6322900	5586900	3359300	5843300	3871500	3913200	3028300	3333700	3815900	3847700
XP_021475539.1	XP_021475539.1	XP_021475539.1 complement component C8 gamma chain isoform X1 [Oncorhynchus mykiss]	0	0	0	0	0	0	0	0	0	0	0	0	0	0	0	0	0	0	0	0	0	0	0	0	0	0	0	0	0	0	0	0	0	0	0	0	0	0	0	8950200	0	0	0	0	0	0	0
XP_021475758.1	XP_021475758.1	XP_021475758.1 myosin-7-like [Oncorhynchus mykiss]	0	0	0	0	0	0	0	0	0	0	0	0	0	0	0	0	0	0	0	0	0	0	0	0	0	0	0	0	0	0	0	0	0	0	0	0	0	0	0	0	0	0	0	0	0	0	0
XP_021475868.1	XP_021475868.1	XP_021475868.1 complement C1q-like protein 4 [Oncorhynchus mykiss]	571300000	552980000	555660000	497710000	588170000	631820000	661980000	573810000	541610000	547750000	683680000	758960000	696750000	883820000	936160000	886720000	1054700000	941700000	893620000	902170000	422120000	457600000	402450000	459170000	460560000	493280000	599360000	706520000	722990000	775760000	573700000	710620000	713580000	700500000	685660000	703800000	667740000	638480000	599370000	465730000	704540000	933800000	991090000	980560000	837100000	906390000	826300000
XP_021476060.1;XP_021418021.1	XP_021476060.1	XP_021476060.1 lipocalin-like [Oncorhynchus mykiss]	180610000	160890000	194070000	151020000	114100000	154990000	164140000	178070000	185250000	173600000	119620000	143450000	185430000	122910000	143740000	167380000	230500000	164310000	144610000	144270000	136500000	128000000	151570000	103000000	107970000	142540000	149740000	166810000	178400000	164390000	241760000	216600000	273850000	216360000	216360000	233080000	209340000	284040000	238860000	194240000	165360000	195760000	218200000	177360000	128210000	176730000	237970000
XP_021476092.1;XP_021476125.1;XP_021476116.1;XP_021476082.1	XP_021476092.1;XP_021476125.1;XP_021476116.1;XP_021476082.1	XP_021476092.1 collagen alpha-6(VI) chain-like [Oncorhynchus mykiss];XP_021476125.1 collagen alpha-6(VI) chain-like isoform X2 [Oncorhynchus mykiss];XP_021476116.1 collagen alpha-6(VI) chain-like isoform X1 [Oncorhynchus mykiss];XP_021476082.1 collagen alpha-6(VI) chain-like [Oncorhynchus mykiss]	0	0	0	0	0	0	0	0	0	0	0	0	0	0	0	0	0	0	0	0	0	0	0	0	0	0	0	0	0	0	0	0	0	0	0	0	0	0	0	0	0	0	805670	0	0	0	0
XP_021476111.1	XP_021476111.1	XP_021476111.1 DNA polymerase alpha catalytic subunit [Oncorhynchus mykiss]	0	0	0	0	0	0	0	0	0	0	0	0	0	0	0	0	0	0	0	0	0	0	0	0	0	0	0	0	0	0	0	0	0	0	0	0	0	0	0	0	0	0	0	0	0	0	0
XP_021476188.1;XP_021476187.1	XP_021476188.1;XP_021476187.1	XP_021476188.1 tissue factor-like [Oncorhynchus mykiss];XP_021476187.1 tissue factor-like [Oncorhynchus mykiss]	0	21204000	22407000	20243000	23397000	23339000	20298000	18153000	0	21686000	0	0	0	0	0	0	20482000	0	0	0	14494000	15857000	16720000	12370000	15702000	11614000	0	0	8417300	0	29540000	24273000	18578000	27465000	21406000	28967000	19303000	36064000	23831000	15653000	15103000	14062000	11052000	12008000	18339000	8699000	0
XP_021476283.1;XP_021476280.1;XP_021476281.1;XP_021476279.1;XP_021418803.1;XP_021418802.1;XP_021418801.1;XP_021468811.1;XP_021445284.1;XP_021445283.1;XP_021445282.1;XP_021468810.1	XP_021476283.1;XP_021476280.1;XP_021476281.1;XP_021476279.1	XP_021476283.1 integrin beta-1-like isoform X4 [Oncorhynchus mykiss];XP_021476280.1 integrin beta-1-like isoform X2 [Oncorhynchus mykiss];XP_021476281.1 integrin beta-1-like isoform X3 [Oncorhynchus mykiss];XP_021476279.1 integrin beta-1-like isoform X1 [Oncorhynchus mykiss]	988680000	865200000	892600000	778330000	720570000	662840000	635170000	644670000	629120000	631780000	1058200000	1085000000	933150000	907380000	797980000	700240000	967770000	879430000	872010000	881820000	497510000	454470000	424270000	350300000	334700000	321770000	316060000	248640000	214500000	168450000	338270000	307960000	271350000	239210000	255290000	256620000	320320000	318550000	289190000	206340000	1340400000	1407300000	1347100000	1278900000	1061000000	1170200000	1125100000
XP_021476397.1;XP_021418667.1	XP_021476397.1;XP_021418667.1	XP_021476397.1 plexin domain-containing protein 2-like [Oncorhynchus mykiss];XP_021418667.1 plexin domain-containing protein 2 [Oncorhynchus mykiss]	20134000	0	0	12931000	11328000	11599000	10964000	12738000	15324000	11978000	14670000	12317000	10943000	12426000	7210400	11054000	21615000	12085000	16111000	11444000	21542000	14064000	10503000	8952000	12632000	15069000	15095000	13022000	10778000	8851700	14790000	11175000	11722000	9344700	8689500	10667000	15310000	13817000	12897000	10335000	13250000	11893000	14586000	8947600	14269000	11731000	12605000
XP_021476748.1;XP_021476747.1;XP_021476746.1;XP_021476745.1;XP_021476740.1;XP_021476744.1;XP_021476743.1;XP_021476741.1;XP_021476739.1;XP_021476736.1;XP_021476749.1;XP_021476738.1;XP_021476737.1	XP_021476748.1;XP_021476747.1;XP_021476746.1;XP_021476745.1;XP_021476740.1;XP_021476744.1;XP_021476743.1;XP_021476741.1;XP_021476739.1;XP_021476736.1;XP_021476749.1;XP_021476738.1;XP_021476737.1	XP_021476748.1 alpha-1-antitrypsin-like isoform X12 [Oncorhynchus mykiss];XP_021476747.1 alpha-1-antitrypsin-like isoform X11 [Oncorhynchus mykiss];XP_021476746.1 alpha-1-antitrypsin-like isoform X10 [Oncorhynchus mykiss];XP_021476745.1 alpha-1-antitrypsin-like isoform X9 [Oncorhynchus mykiss];XP_021476740.1 alpha-1-antitrypsin-like isoform X5 [Oncorhynchus mykiss];XP_021476744.1 alpha-1-antitryp…	298130000	228950000	208980000	165700000	163430000	192850000	176410000	153830000	154620000	185680000	317360000	331170000	222570000	188490000	204320000	162890000	33414000	262130000	233910000	240390000	10608000	11928000	12358000	18014000	19813000	8316400	6408500	10849000	8055200	15186000	29223000	23279000	38944000	60481000	44695000	22820000	45088000	29634000	23500000	24329000	47804000	33100000	27912000	39358000	54018000	21156000	21386000
XP_021477053.1;XP_021477052.1	XP_021477053.1;XP_021477052.1	XP_021477053.1 A disintegrin and metalloproteinase with thrombospondin motifs 13 isoform X2 [Oncorhynchus mykiss];XP_021477052.1 A disintegrin and metalloproteinase with thrombospondin motifs 13 isoform X1 [Oncorhynchus mykiss]	60304000	56019000	54895000	45887000	44839000	43726000	46919000	46898000	40944000	42499000	63981000	54283000	42798000	46476000	37864000	32786000	49808000	45427000	50021000	45306000	49028000	49543000	42109000	35284000	40932000	34891000	37276000	35620000	28373000	25318000	48010000	34831000	36032000	37230000	44690000	46390000	39095000	41921000	39789000	27407000	43583000	42995000	40966000	38741000	38954000	41749000	40488000
XP_021477306.1;XP_021461768.1	XP_021477306.1	XP_021477306.1 transcobalamin-2 [Oncorhynchus mykiss]	98773000	76690000	80994000	76048000	74539000	73484000	49743000	58348000	47030000	51692000	72875000	54435000	47725000	56860000	58445000	61626000	37814000	47755000	47102000	49437000	86285000	78922000	72549000	67348000	60116000	64006000	59853000	51451000	42606000	42344000	71178000	54240000	52880000	54546000	79314000	84651000	71122000	64113000	64168000	45334000	58260000	52276000	46629000	53681000	60414000	55519000	50150000
XP_021477514.1;XP_021451343.1	XP_021477514.1	XP_021477514.1 serum albumin 2-like [Oncorhynchus mykiss]	56568000	38367000	39138000	36772000	34212000	36908000	33754000	38220000	38522000	38159000	65060000	67314000	44900000	56603000	47460000	51974000	72547000	50196000	58576000	48556000	60825000	62642000	52882000	46821000	44498000	32320000	33340000	30743000	41105000	32378000	41532000	31622000	36926000	34950000	35524000	41155000	30253000	38091000	50539000	37564000	72897000	62849000	48627000	47341000	49791000	47594000	46844000
XP_021477515.1;XP_021477516.1	XP_021477515.1;XP_021477516.1	XP_021477515.1 putative aminopeptidase W07G4.4 isoform X1 [Oncorhynchus mykiss];XP_021477516.1 putative aminopeptidase W07G4.4 isoform X2 [Oncorhynchus mykiss]	10243000	9015900	9763700	9262700	9674900	9876300	7617600	11679000	12434000	12266000	8854800	7908600	8304300	9698800	9667000	9576500	16185000	11674000	9006300	15975000	10838000	7951600	9694100	13665000	10648000	11638000	11203000	13233000	16711000	14580000	10699000	11757000	12776000	10933000	11253000	17814000	18586000	19697000	19068000	14442000	9110800	9469900	9608700	10313000	9546600	12058000	11660000
XP_021477662.1;XP_021477651.1	XP_021477662.1;XP_021477651.1	XP_021477662.1 ictacalcin-like [Oncorhynchus mykiss];XP_021477651.1 ictacalcin-like [Oncorhynchus mykiss]	0	0	0	0	0	0	0	0	0	0	0	0	0	0	0	0	0	0	0	0	0	0	0	0	0	0	0	0	0	0	0	0	0	0	0	0	0	0	0	333580	0	0	0	0	0	0	0
XP_021477825.1	XP_021477825.1	XP_021477825.1 uncharacterized protein LOC110536388 [Oncorhynchus mykiss]	0	0	0	0	0	0	0	0	0	0	0	0	0	0	0	0	0	0	0	0	0	0	0	0	0	0	0	0	0	0	0	0	0	0	0	0	0	0	0	0	0	0	0	0	0	0	0
XP_021477863.1	XP_021477863.1	XP_021477863.1 uncharacterized protein LOC110536423 [Oncorhynchus mykiss]	28822000	28327000	34943000	33879000	37187000	34451000	33405000	32174000	42145000	37841000	80611000	80348000	84923000	87606000	92551000	97044000	46101000	90125000	84781000	82168000	21599000	30057000	23094000	19531000	23661000	18404000	17622000	22852000	23878000	24897000	0	0	0	0	3530400	0	0	0	0	0	75525000	96182000	85032000	86161000	116030000	82855000	73490000
XP_021477864.1	XP_021477864.1	XP_021477864.1 zona pellucida sperm-binding protein 3 receptor-like [Oncorhynchus mykiss]	0	5151600	9158600	7226600	7612200	8723900	9318300	10017000	13710000	9943600	22624000	28390000	20566000	28472000	23572000	19755000	29370000	29071000	31083000	26328000	4553200	5842500	7942700	7112400	5584000	9849300	8745100	9392800	12346000	8465800	0	0	0	0	0	0	0	0	0	0	26537000	48723000	43612000	40174000	42333000	39442000	37812000
XP_021477880.1	XP_021477880.1	XP_021477880.1 fibrinogen alpha chain-like [Oncorhynchus mykiss]	156120000	138160000	124610000	112710000	112800000	140010000	132760000	105880000	99850000	94980000	103190000	84214000	80260000	76323000	109880000	108650000	63826000	81735000	77504000	85150000	116850000	137930000	105680000	104060000	93806000	147970000	133300000	130210000	101240000	123520000	132130000	142720000	136040000	137830000	175210000	165800000	151620000	140200000	110110000	134680000	77932000	105330000	87889000	81719000	101180000	100670000	101970000
XP_021477885.1	XP_021477885.1	XP_021477885.1 fibrinogen alpha chain-like [Oncorhynchus mykiss]	0	0	0	0	0	0	0	0	0	0	0	0	0	0	0	0	0	0	0	0	0	0	0	0	0	0	0	0	0	0	0	0	0	0	0	0	5197500	0	0	0	0	0	0	0	0	0	0
XP_021477886.1	XP_021477886.1	XP_021477886.1 fibrinogen beta chain-like, partial [Oncorhynchus mykiss]	0	0	0	0	0	0	0	0	0	0	0	0	0	0	0	0	0	0	0	0	0	0	0	0	0	26129000	0	0	0	0	51724000	34180000	35164000	0	49662000	48563000	79041000	22120000	0	29792000	0	0	0	31967000	0	36018000	0
XP_021477941.1;XP_021458681.1;XP_021478424.1	XP_021477941.1	XP_021477941.1 fructose-1,6-bisphosphatase 1-like [Oncorhynchus mykiss]	0	7467000	10215000	19170000	20314000	22295000	16196000	15912000	21645000	24292000	0	8542700	10730000	17921000	15296000	13027000	0	17004000	26410000	33979000	0	0	0	13842000	14826000	13187000	0	14499000	16342000	13553000	0	0	0	0	0	0	0	0	0	0	0	0	0	16674000	14550000	16427000	16870000
XP_021478079.1	XP_021478079.1	XP_021478079.1 protein AMBP isoform X1 [Oncorhynchus mykiss]	96822000	105430000	112780000	122860000	98792000	131630000	134170000	126060000	112900000	132080000	103460000	97414000	82340000	106070000	99679000	111610000	172990000	94926000	76529000	101750000	111480000	92181000	104680000	102280000	72964000	155190000	138610000	110510000	94310000	115650000	107560000	82884000	114410000	105270000	120480000	107860000	141110000	95657000	87458000	93464000	54386000	83829000	120750000	109400000	68638000	109420000	93133000
XP_021479315.1;XP_021473640.1	XP_021479315.1;XP_021473640.1	XP_021479315.1 phosphoglycerate kinase-like [Oncorhynchus mykiss];XP_021473640.1 phosphoglycerate kinase [Oncorhynchus mykiss]	0	0	0	0	0	0	0	0	0	0	11095000	0	0	0	0	0	0	0	0	0	6230100	0	0	0	0	0	8068700	0	0	0	0	0	0	11222000	0	0	0	0	0	0	13082000	0	0	0	2685800	0	3860600
XP_021479899.1	XP_021479899.1	XP_021479899.1 trypsin-1-like isoform X2 [Oncorhynchus mykiss]	0	0	0	0	0	0	0	0	0	0	0	0	0	0	0	0	0	0	0	0	0	0	0	7880300	0	0	0	0	0	0	0	0	7723900	0	0	0	7827300	0	0	0	0	0	0	0	0	0	0
XP_021479911.1;XP_021479864.1;XP_021479855.1	XP_021479911.1;XP_021479864.1;XP_021479855.1	XP_021479911.1 trypsin-2 [Oncorhynchus mykiss];XP_021479864.1 trypsin-1 isoform X2 [Oncorhynchus mykiss];XP_021479855.1 trypsin-1 isoform X1 [Oncorhynchus mykiss]	8471100	7967500	7973100	9094300	8858100	7648600	6755400	6548200	7099600	6589500	0	6698500	5548800	6424200	4713100	5158400	0	0	5337700	0	0	3644400	0	0	0	7538600	0	0	0	0	6511600	3504000	5251600	0	0	0	11002000	0	0	0	9485100	6363100	11173000	17188000	8397700	13454000	12792000
XP_021480047.1;XP_021480039.1	XP_021480047.1;XP_021480039.1	XP_021480047.1 apolipoprotein A-IV-like [Oncorhynchus mykiss];XP_021480039.1 apolipoprotein A-IV-like [Oncorhynchus mykiss]	548780000	555010000	716680000	897820000	723560000	1148600000	833070000	568680000	651600000	617190000	694900000	522250000	881280000	1092000000	865930000	962500000	0	608010000	724090000	933860000	1137400000	953290000	1274100000	1388500000	1064000000	1573700000	877530000	470370000	549830000	651500000	1504500000	942240000	875820000	1359800000	1794400000	1539100000	1070300000	730890000	720490000	1049600000	632060000	523330000	559640000	630250000	614310000	564840000	438470000
XP_021480058.1	XP_021480058.1	XP_021480058.1 apolipoprotein A-IV-like [Oncorhynchus mykiss]	24320000	30530000	41184000	55959000	42786000	70741000	51145000	22277000	45188000	47253000	32179000	32497000	42188000	62270000	64260000	55442000	0	27207000	68233000	64531000	103180000	94044000	134100000	132210000	113400000	156560000	77335000	36798000	56489000	57642000	90109000	67791000	75352000	108430000	137970000	107520000	77639000	61208000	71687000	94797000	59966000	49845000	65426000	72686000	82383000	66973000	51019000
XP_021480069.1	XP_021480069.1	XP_021480069.1 apolipoprotein Eb-like [Oncorhynchus mykiss]	638920000	726700000	643750000	592640000	619360000	684740000	733930000	588710000	698520000	534290000	666380000	620170000	685400000	794630000	829780000	771280000	11797000	916530000	1115200000	791340000	933320000	879060000	921450000	873970000	1003600000	1024100000	861810000	895440000	989890000	1115400000	1008200000	1099700000	789230000	719490000	851400000	1019700000	914450000	950410000	1170000000	891360000	830330000	767580000	720610000	594310000	723160000	774960000	821180000
XP_021480081.1	XP_021480081.1	XP_021480081.1 uncharacterized protein LOC110537931 [Oncorhynchus mykiss]	19691000	42342000	33180000	27084000	25588000	30375000	26079000	19625000	42910000	29856000	30229000	24189000	36657000	34042000	35917000	27702000	0	29836000	42986000	30900000	43804000	37900000	67044000	61282000	47959000	58324000	44029000	26427000	36623000	35471000	58874000	47117000	68444000	68503000	44615000	53974000	48186000	56093000	51853000	80212000	38853000	31636000	62646000	66949000	85969000	49458000	53159000
XP_021480094.1	XP_021480094.1	XP_021480094.1 apolipoprotein C-I-like [Oncorhynchus mykiss]	19352000	38345000	33795000	26417000	27315000	36932000	0	0	97542000	0	0	33773000	40231000	0	42269000	42989000	0	55124000	82805000	75013000	0	33797000	33432000	28051000	27164000	46383000	50703000	40483000	42740000	50642000	53767000	62498000	53934000	41064000	0	41230000	79811000	45561000	0	63981000	36556000	46214000	58637000	49613000	0	45629000	69343000
XP_021480106.1	XP_021480106.1	XP_021480106.1 uncharacterized protein LOC110537948 [Oncorhynchus mykiss]	8409200000	6903700000	6994800000	6539600000	5498500000	5863000000	5663300000	7182600000	6284300000	7564800000	7187600000	8061100000	6701200000	7471000000	6829400000	5827300000	695850000	6557300000	5612700000	7767000000	16558000000	9009700000	12059000000	12280000000	9753300000	12005000000	8896900000	7454500000	6942000000	6951300000	7804500000	6112700000	5843700000	5331900000	5513200000	5363100000	8915700000	5514100000	6661500000	6173400000	6305500000	6827200000	8147200000	7794000000	7778500000	8874100000	8804500000
XP_021480137.1;XP_021454085.1	XP_021480137.1	XP_021480137.1 heme-binding protein 2-like [Oncorhynchus mykiss]	0	0	0	0	0	0	0	0	0	0	0	0	0	0	0	0	0	0	0	0	0	0	0	0	0	0	0	0	0	0	0	0	0	0	0	0	0	8939700	0	0	0	0	0	0	0	0	0
XP_021480396.1	XP_021480396.1	XP_021480396.1 nucleoside diphosphate kinase B-like [Oncorhynchus mykiss]	60477000	47340000	53007000	73178000	44987000	54092000	41123000	27474000	32986000	32650000	24855000	26455000	7867200	24454000	17724000	14891000	7236300	8950000	11777000	20705000	40174000	26097000	20023000	44162000	24806000	54631000	54297000	26470000	21671000	37376000	16040000	18784000	22445000	18028000	10646000	10740000	30580000	8852600	8132900	17718000	30931000	15942000	16596000	20962000	22388000	15363000	32011000
XP_021480531.1	XP_021480531.1	XP_021480531.1 complement C1q-like protein 2 [Oncorhynchus mykiss]	61754000	57585000	57789000	53278000	50822000	53828000	50897000	47736000	44234000	44597000	90623000	64894000	65826000	75553000	83599000	75064000	103090000	82323000	82374000	68425000	50809000	67026000	52728000	49875000	56781000	45841000	54798000	47128000	39499000	31753000	40576000	42919000	39319000	41083000	45924000	50977000	39507000	47931000	42879000	32191000	47599000	38682000	27976000	24795000	34372000	28147000	25798000
XP_021480534.1	XP_021480534.1	XP_021480534.1 complement C1q-like protein 2 [Oncorhynchus mykiss]	7998000	12221000	9483800	13823000	45941000	32336000	40044000	37365000	33618000	25331000	0	0	9997700	0	25207000	16798000	27869000	14027000	15466000	12159000	5220500	16774000	13313000	28439000	67983000	80899000	81864000	129990000	110030000	171400000	3438300	43893000	37316000	30986000	21735000	21583000	16274000	17453000	15548000	14256000	11229000	34255000	36211000	33715000	32838000	26100000	35371000
XP_021480674.1	XP_021480674.1	XP_021480674.1 insulin-like growth factor-binding protein complex acid labile subunit [Oncorhynchus mykiss]	8872700	9548000	9858500	9471300	9010600	9509300	5483400	6695400	9152600	6984200	8529400	7908200	6772900	8351700	8776700	7616400	0	7133400	8819600	7406300	9878800	8014100	6356900	7190400	6166400	6548600	5538400	6771800	7682900	6067100	7995600	7442900	8887700	9639600	9128100	8278400	8371600	8249900	7535900	6038100	5767600	8861200	6512900	6711500	6933500	6536700	6246000
XP_021480948.1	XP_021480948.1	XP_021480948.1 hemoglobin subunit beta-like [Oncorhynchus mykiss]	4251400000	2416500000	2270300000	1248100000	1711500000	1199900000	628300000	2435100000	705410000	1592000000	12371000000	3861700000	4118900000	932770000	1059900000	2708200000	1549600000	1360800000	753860000	905780000	3551200000	2803100000	3486200000	5621600000	2047600000	1089800000	2751200000	903280000	2023000000	1553100000	1168900000	922770000	2554800000	3857500000	1490800000	744030000	3515000000	933320000	432890000	3273300000	30121000000	1986800000	1698400000	919560000	1482700000	1141900000	2029500000
XP_021480950.1;XP_021480949.1	XP_021480950.1;XP_021480949.1	XP_021480950.1 hemoglobin subunit beta [Oncorhynchus mykiss];XP_021480949.1 hemoglobin subunit beta [Oncorhynchus mykiss]	71676000	30492000	29146000	0	29167000	19869000	0	47582000	0	53960000	260680000	148510000	116960000	22972000	32048000	57315000	60530000	28472000	0	23119000	182260000	194040000	199860000	307010000	126070000	50101000	128710000	39074000	64626000	54323000	26253000	23299000	105330000	151390000	67916000	21681000	93159000	21887000	13244000	118910000	1581200000	91029000	43596000	35231000	54528000	26474000	59229000
XP_021480952.1	XP_021480952.1	XP_021480952.1 hemoglobin subunit beta-1-like isoform X1 [Oncorhynchus mykiss]	369920000	202380000	188200000	132470000	137300000	138210000	68601000	249580000	90344000	243190000	1634900000	683800000	649030000	151760000	169600000	377620000	241070000	195020000	92714000	192790000	606120000	396630000	527830000	829640000	292740000	205850000	512880000	150680000	311650000	306590000	135510000	77653000	301280000	456150000	173470000	79760000	563500000	110160000	42239000	324300000	4129100000	280600000	300460000	154360000	160040000	201190000	341370000
XP_021480954.1	XP_021480954.1	XP_021480954.1 hemoglobin subunit alpha-4-like [Oncorhynchus mykiss]	878310000	505970000	477060000	271090000	375590000	248660000	136470000	500680000	166700000	314610000	2523400000	666870000	772270000	155960000	180190000	472210000	240610000	240310000	138370000	150760000	868430000	638330000	734480000	1200800000	488160000	294610000	720690000	236680000	555790000	408110000	300490000	213520000	608410000	918190000	360680000	189640000	916700000	156840000	108510000	721880000	5808600000	475040000	432470000	235630000	291330000	298130000	461910000
XP_021480956.1	XP_021480956.1	XP_021480956.1 hemoglobin subunit alpha-1-like [Oncorhynchus mykiss]	4147800	2834500	0	0	0	0	0	0	0	0	16470000	4331100	4591000	0	0	0	0	0	0	0	21346000	6404000	8145900	40201000	0	0	22412000	0	14531000	0	5661200	0	0	0	0	0	13578000	3998100	0	19552000	106790000	0	0	0	3138400	2594700	1719600
XP_021480958.1	XP_021480958.1	XP_021480958.1 hemoglobin subunit alpha-like [Oncorhynchus mykiss]	15994000	0	0	0	0	0	0	0	0	0	31234000	0	0	0	0	0	0	0	0	0	9241400	0	5389600	0	0	0	0	0	0	0	0	0	17463000	31940000	0	0	27985000	0	0	34501000	332090000	24468000	18104000	7129700	0	9958600	23168000
XP_021480959.1	XP_021480959.1	XP_021480959.1 hemoglobin subunit beta-1-like [Oncorhynchus mykiss]	0	0	0	0	0	0	0	0	0	0	0	0	0	0	0	0	0	0	0	0	0	0	0	0	0	0	0	0	0	0	0	0	0	0	0	0	0	0	0	0	27599000	0	0	0	0	0	0
XP_021481642.1	XP_021481642.1	XP_021481642.1 uncharacterized protein LOC110539009 [Oncorhynchus mykiss]	0	0	0	0	0	0	0	0	0	0	0	0	0	0	0	0	0	0	0	0	0	0	0	0	0	0	0	0	0	0	0	0	0	0	0	0	0	0	0	0	0	0	0	0	0	0	0
[truncated: 520 more columns]

## Sheet: Table S2 - Filtered data
Protein IDs	Majority protein IDs	Fasta headers	LFQ intensity 4_d00	LFQ intensity 4_d07	LFQ intensity 4_d14	LFQ intensity 4_d21	LFQ intensity 4_d28	LFQ intensity 4_d35	LFQ intensity 4_d42	LFQ intensity 4_d56	LFQ intensity 4_d70	LFQ intensity 4_d84	LFQ intensity 5_d00	LFQ intensity 5_d07	LFQ intensity 5_d14	LFQ intensity 5_d21	LFQ intensity 5_d28	LFQ intensity 5_d35	LFQ intensity 5_d42	LFQ intensity 5_d56	LFQ intensity 5_d70	LFQ intensity 5_d84	LFQ intensity 6_d00	LFQ intensity 6_d07	LFQ intensity 6_d14	LFQ intensity 6_d21	LFQ intensity 6_d28	LFQ intensity 6_d35	LFQ intensity 6_d42	LFQ intensity 6_d56	LFQ intensity 6_d70	LFQ intensity 6_d84	LFQ intensity 7_d00	LFQ intensity 7_d07	LFQ intensity 7_d14	LFQ intensity 7_d21	LFQ intensity 7_d28	LFQ intensity 7_d35	LFQ intensity 7_d42	LFQ intensity 7_d56	LFQ intensity 7_d70	LFQ intensity 7_d84	LFQ intensity 8_d00	LFQ intensity 8_d07	LFQ intensity 8_d14	LFQ intensity 8_d21	LFQ intensity 8_d28	LFQ intensity 8_d35	LFQ intensity 8_d42
XP_021412446.1;XP_021412440.1;XP_021412445.1;XP_021412444.1;XP_021412439.1	XP_021412446.1;XP_021412440.1;XP_021412445.1;XP_021412444.1;XP_021412439.1	XP_021412446.1 uncharacterized protein LOC110485666 isoform X3 [Oncorhynchus mykiss];XP_021412440.1 uncharacterized protein LOC110485664 isoform X2 [Oncorhynchus mykiss];XP_021412445.1 uncharacterized protein LOC110485666 isoform X2 [Oncorhynchus mykiss];XP_021412444.1 uncharacterized protein LOC110485666 isoform X1 [Oncorhynchus mykiss];XP_021412439.1 uncharacterized protein LOC110485664 isoform…	0	0	6762900	11744000	32180000	28060000	25116000	22079000	11159000	14019000	0	0	10588000	16504000	27201000	17954000	2854700	14343000	8920700	8713000	0	10807000	0	17847000	30850000	24315000	20977000	41017000	37757000	59252000	0	45680000	24211000	22836000	15106000	11846000	8145300	0	0	7637200	0	36204000	23083000	21100000	16595000	19676000	18717000
XP_021480674.1	XP_021480674.1	XP_021480674.1 insulin-like growth factor-binding protein complex acid labile subunit [Oncorhynchus mykiss]	8872700	9548000	9858500	9471300	9010600	9509300	5483400	6695400	9152600	6984200	8529400	7908200	6772900	8351700	8776700	7616400	0	7133400	8819600	7406300	9878800	8014100	6356900	7190400	6166400	6548600	5538400	6771800	7682900	6067100	7995600	7442900	8887700	9639600	9128100	8278400	8371600	8249900	7535900	6038100	5767600	8861200	6512900	6711500	6933500	6536700	6246000
XP_021480534.1	XP_021480534.1	XP_021480534.1 complement C1q-like protein 2 [Oncorhynchus mykiss]	7998000	12221000	9483800	13823000	45941000	32336000	40044000	37365000	33618000	25331000	0	0	9997700	0	25207000	16798000	27869000	14027000	15466000	12159000	5220500	16774000	13313000	28439000	67983000	80899000	81864000	129990000	110030000	171400000	3438300	43893000	37316000	30986000	21735000	21583000	16274000	17453000	15548000	14256000	11229000	34255000	36211000	33715000	32838000	26100000	35371000
XP_021423950.1;XP_021423951.1	XP_021423950.1;XP_021423951.1	XP_021423950.1 uncharacterized protein LOC110493791 isoform X1 [Oncorhynchus mykiss];XP_021423951.1 uncharacterized protein LOC110493791 isoform X2 [Oncorhynchus mykiss]	24116000	39364000	31775000	26458000	30207000	37681000	37689000	31265000	28924000	35817000	20896000	50670000	61746000	64797000	75277000	60544000	47620000	28476000	25424000	42162000	9829900	36786000	24502000	35644000	31496000	45389000	35137000	81154000	83221000	82100000	13989000	68632000	32134000	30732000	26406000	24561000	13829000	17758000	30136000	50057000	11577000	98388000	49249000	33503000	37515000	13118000	9992200
XP_021425592.1	XP_021425592.1	XP_021425592.1 hepatocyte growth factor-like protein [Oncorhynchus mykiss]	16208000	14009000	14985000	12865000	17504000	22618000	19884000	16710000	15587000	17165000	19918000	20209000	24062000	22871000	26385000	26160000	32824000	24145000	22842000	22688000	17000000	20610000	15483000	18473000	23874000	28587000	27670000	30801000	38016000	39496000	19444000	32393000	25032000	23448000	25859000	21517000	18939000	23478000	21397000	20692000	15702000	22299000	18376000	15881000	18548000	20403000	20204000
XP_021454013.1	XP_021454013.1	XP_021454013.1 ictacalcin-like [Oncorhynchus mykiss]	8468100	4787100	10089000	11965000	7008500	6753100	5087400	8996100	6395200	7527100	2714900	4599900	4201900	6503100	4396200	3870900	4757700	3364700	3989100	6842700	9311800	4685300	6518700	7049800	5267400	6599900	6299500	7723900	5197500	10059000	10827000	12333000	11719000	14017000	7638800	6754100	9983300	9457200	7247000	9392600	6558800	5070600	6553800	8639800	4464600	7628200	5420600
XP_021431955.1	XP_021431955.1	XP_021431955.1 glucose-6-phosphate isomerase-like [Oncorhynchus mykiss]	5744400	9528800	13890000	26992000	32514000	26506000	23324000	30956000	36907000	32007000	0	7550500	14859000	20981000	26803000	22755000	10087000	21371000	21524000	36324000	10137000	9966600	15333000	22346000	34731000	23742000	22946000	30581000	40083000	55617000	16067000	26249000	23586000	28953000	26531000	26940000	21558000	28910000	34735000	55941000	15181000	15001000	13302000	17796000	25235000	17743000	17383000
XP_021420241.1	XP_021420241.1	XP_021420241.1 microfibril-associated glycoprotein 4-like [Oncorhynchus mykiss]	6349600	10788000	8230600	9343000	21523000	12016000	16098000	12662000	10635000	11191000	0	0	26189000	0	67753000	46077000	106090000	49470000	34944000	32639000	0	21620000	15131000	38647000	37855000	71040000	39497000	103910000	118720000	157070000	30900000	142510000	102720000	70432000	37374000	53917000	85553000	40491000	44112000	51271000	29342000	108800000	88173000	80291000	48150000	67178000	65988000
XP_021413598.1	XP_021413598.1	XP_021413598.1 microfibril-associated glycoprotein 4-like [Oncorhynchus mykiss]	6503100	8691800	11824000	17672000	66552000	64706000	67464000	60311000	45015000	33537000	0	13749000	32722000	45805000	71333000	51425000	102120000	83380000	87936000	59860000	10938000	18577000	0	34635000	88032000	89598000	95411000	104070000	85247000	89545000	27154000	44823000	40363000	43027000	40523000	47388000	31308000	31794000	29734000	23763000	24302000	30739000	21957000	28705000	43451000	40319000	46735000
XP_021451323.1;XP_021449060.1	XP_021451323.1	XP_021451323.1 microfibril-associated glycoprotein 4-like [Oncorhynchus mykiss]	0	12760000	11674000	34164000	99900000	82811000	113460000	90831000	73607000	62327000	19248000	42042000	105040000	127560000	185370000	208820000	81753000	130360000	73433000	72622000	37329000	57464000	29780000	109290000	203570000	260750000	195860000	251970000	219310000	291470000	39390000	112460000	80335000	81694000	84059000	86544000	52391000	55610000	42157000	53312000	42853000	171170000	97541000	98873000	95108000	72672000	103300000
XP_021443425.1;XP_021443425.1	XP_021443425.1;XP_021443425.1	XP_021443425.1 high affinity immunoglobulin gamma Fc receptor I-like [Oncorhynchus mykiss];XP_021443425.1 high affinity immunoglobulin gamma Fc receptor I-like [Oncorhynchus mykiss]	6709100	5846300	6847000	8213900	6187100	4217500	8254000	5890900	4969900	5021000	8871000	10675000	9798200	15730000	8672800	9055200	12568000	7231400	8184100	0	8622500	6880800	17338000	30034000	38766000	13336000	7791600	9090700	9589900	12293000	6367900	6387300	6082900	9301300	9148900	7073000	4438900	8029800	15878000	21879000	8593700	10075000	8953400	9366200	23412000	9783800	11060000
XP_021477515.1;XP_021477516.1	XP_021477515.1;XP_021477516.1	XP_021477515.1 putative aminopeptidase W07G4.4 isoform X1 [Oncorhynchus mykiss];XP_021477516.1 putative aminopeptidase W07G4.4 isoform X2 [Oncorhynchus mykiss]	10243000	9015900	9763700	9262700	9674900	9876300	7617600	11679000	12434000	12266000	8854800	7908600	8304300	9698800	9667000	9576500	16185000	11674000	9006300	15975000	10838000	7951600	9694100	13665000	10648000	11638000	11203000	13233000	16711000	14580000	10699000	11757000	12776000	10933000	11253000	17814000	18586000	19697000	19068000	14442000	9110800	9469900	9608700	10313000	9546600	12058000	11660000
XP_021436581.1	XP_021436581.1	XP_021436581.1 LOW QUALITY PROTEIN: von Willebrand factor-like [Oncorhynchus mykiss]	10825000	9131700	9062600	7055900	7616400	8684600	7738600	8464200	7238300	10465000	11992000	8199100	10031000	8995400	9110900	9244000	13522000	11254000	9494000	8920900	8884200	8097400	6999100	7810900	7020000	8696200	8246200	11063000	7925500	6762000	8992300	9235200	7680800	6628600	8112900	8276000	8672600	10666000	9214600	7278800	4971600	7654300	5415100	4904800	5425000	6480000	7214400
XP_021421369.1	XP_021421369.1	XP_021421369.1 intelectin-like [Oncorhynchus mykiss]	197880000	180030000	171150000	167190000	166480000	148150000	150350000	143920000	129530000	126530000	52912000	39443000	43342000	37554000	42293000	37440000	52843000	35894000	34518000	32115000	65434000	78368000	65978000	65768000	61690000	42948000	52881000	62343000	62829000	60432000	34514000	42394000	51424000	46466000	61392000	53464000	32705000	44414000	39576000	38992000	26600000	37067000	27808000	27591000	35907000	27226000	23460000
NP_001117750.1	NP_001117750.1	NP_001117750.1 retinol-binding protein 4 precursor [Oncorhynchus mykiss]	0	26248000	25881000	20385000	21098000	31226000	27226000	20667000	13606000	20897000	21767000	0	25246000	27702000	31721000	0	37569000	22464000	0	21192000	24914000	35845000	40823000	24934000	22420000	26645000	27792000	25732000	17181000	16058000	28272000	24432000	42443000	42837000	61232000	54750000	25538000	35352000	26150000	24047000	31019000	26346000	29969000	21709000	24836000	20628000	14168000
XP_021422786.1;XP_021422785.1;XP_021422784.1	XP_021422786.1;XP_021422785.1;XP_021422784.1	XP_021422786.1 uncharacterized protein LOC110492668 [Oncorhynchus mykiss];XP_021422785.1 uncharacterized protein LOC110492668 [Oncorhynchus mykiss];XP_021422784.1 uncharacterized protein LOC110492668 [Oncorhynchus mykiss]	9231000	9971300	8594700	9397300	7940200	7888500	6716500	5603300	7367500	8905400	9127900	9016200	8137700	7509400	7176600	3772700	8499800	8946600	8630800	7204800	7625000	7083800	6869400	5722900	6585000	4341900	4550600	6060300	6849000	5964300	7295400	7864600	7552200	8220900	7223900	10812000	6704100	9455800	8104000	5834500	8056500	8191100	5650000	5322800	6014900	6938200	6359900
XP_021416460.1;XP_021416459.1;XP_021416458.1	XP_021416460.1;XP_021416459.1;XP_021416458.1	XP_021416460.1 lysozyme g-like isoform X3 [Oncorhynchus mykiss];XP_021416459.1 lysozyme g-like isoform X2 [Oncorhynchus mykiss];XP_021416458.1 lysozyme g-like isoform X1 [Oncorhynchus mykiss]	13302000	14459000	14537000	15659000	14923000	19672000	17399000	18759000	18311000	14231000	9580200	10357000	13178000	8965300	9600800	15655000	15530000	14347000	10787000	9585200	13470000	17629000	16860000	12083000	16340000	17309000	22321000	23015000	27019000	21509000	9940800	10355000	10850000	11739000	8708100	11248000	12391000	14897000	13575000	10341000	9853500	9037100	9436600	7693900	8512000	8667100	8634000
XP_021470842.1	XP_021470842.1	XP_021470842.1 malate dehydrogenase, cytoplasmic-like [Oncorhynchus mykiss]	22372000	23036000	22141000	23559000	22327000	19080000	17992000	16869000	16128000	13321000	16022000	29869000	24406000	21068000	16876000	18685000	10589000	14420000	17761000	22885000	14385000	13259000	11031000	11961000	10428000	10099000	7964300	19648000	21182000	16018000	7493500	11963000	11843000	14032000	10717000	10010000	11170000	14405000	14115000	10268000	15908000	11604000	11006000	12800000	14642000	13625000	16328000
XP_021467878.1	XP_021467878.1	XP_021467878.1 protein Z-dependent protease inhibitor-like [Oncorhynchus mykiss]	10850000	10761000	11971000	10030000	10284000	9506800	8052100	8680400	10000000	9991000	10288000	11071000	11078000	8373800	11214000	9310100	14599000	11675000	13496000	12281000	10603000	8378400	8415300	7171900	6290600	6039700	5865400	5593500	6206700	5979500	12158000	11539000	14546000	13236000	16206000	13812000	11798000	12712000	10628000	7757600	11627000	12038000	10032000	8751400	9861000	10042000	7608300
XP_021463596.1;XP_021462400.1	XP_021463596.1;XP_021462400.1	XP_021463596.1 transaldolase-like [Oncorhynchus mykiss];XP_021462400.1 transaldolase-like [Oncorhynchus mykiss]	18271000	18165000	22131000	35341000	43597000	41510000	30400000	36870000	43397000	46644000	13593000	15520000	19143000	29543000	31845000	26157000	9228100	27015000	29835000	31051000	13797000	17493000	19678000	26280000	36427000	27466000	27201000	40929000	46285000	50398000	15677000	24642000	27323000	28392000	29602000	34236000	21916000	34878000	37710000	39220000	21924000	19567000	16659000	23995000	25718000	24615000	22030000
XP_021465605.1;XP_021424955.1	XP_021465605.1;XP_021424955.1	XP_021465605.1 uncharacterized protein LOC110528111 [Oncorhynchus mykiss];XP_021424955.1 uncharacterized protein LOC110494322 [Oncorhynchus mykiss]	12436000	16219000	12266000	0	8644500	12563000	8977500	2742500	2671500	2530200	2095800	2290100	1719100	1615800	1926600	0	0	0	1632800	2100200	7230300	6507000	12795000	8115800	8780100	11669000	35342000	34769000	22760000	18993000	15932000	9516600	15873000	22008000	37987000	18089000	24463000	29034000	15777000	21194000	11211000	13713000	23743000	28008000	40716000	24824000	19887000
XP_021481429.1;XP_021481428.1;XP_021451279.1;XP_021414353.1;XP_021414352.1;NP_001182339.1;XP_021449367.1	XP_021481429.1;XP_021481428.1;XP_021451279.1;XP_021414353.1;XP_021414352.1;NP_001182339.1;XP_021449367.1	XP_021481429.1 parvalbumin beta 1 [Oncorhynchus mykiss];XP_021481428.1 parvalbumin beta 1 [Oncorhynchus mykiss];XP_021451279.1 parvalbumin beta 1 [Oncorhynchus mykiss];XP_021414353.1 parvalbumin beta 1 [Oncorhynchus mykiss];XP_021414352.1 parvalbumin beta 1 [Oncorhynchus mykiss];NP_001182339.1 parvalbumin isoform 1d [Oncorhynchus mykiss];XP_021449367.1 parvalbumin beta 1-like [Oncorhynchus mykiss]	32561000	39467000	70301000	23827000	0	16889000	25713000	23495000	7735200	20416000	204920000	87758000	15652000	16016000	20777000	14855000	10649000	6492600	8023800	39010000	53239000	35039000	8626500	0	11659000	12909000	117850000	11014000	0	28050000	0	12697000	3898800	95325000	5563100	4993100	16323000	0	0	28189000	107900000	14104000	11891000	8931400	11028000	0	53428000
XP_021423793.1;XP_021423792.1	XP_021423793.1;XP_021423792.1	XP_021423793.1 beta-2-glycoprotein 1-like isoform X2 [Oncorhynchus mykiss];XP_021423792.1 beta-2-glycoprotein 1-like isoform X1 [Oncorhynchus mykiss]	9353000	9550300	7243100	8186800	7216600	8297000	10102000	7723900	6878700	7730100	14508000	11416000	10626000	13828000	11482000	11277000	17490000	10417000	9021400	10669000	9531700	9548600	8011000	6876900	8731100	6525400	6274800	8112200	7894500	10512000	9840800	7573600	7338700	6890500	7905000	5175500	6903200	7730700	8118600	5713100	8446700	9863500	8527500	11251000	13932000	11844000	13150000
XP_021427718.1	XP_021427718.1	XP_021427718.1 ectonucleotide pyrophosphatase/phosphodiesterase family member 2-like [Oncorhynchus mykiss]	12198000	11617000	14154000	10820000	9763500	12581000	12718000	14134000	12351000	15275000	11742000	14932000	11554000	10632000	12799000	8308300	15674000	11646000	10281000	10790000	10645000	8994200	10273000	7854400	6278200	11715000	8516700	9409800	7113000	7781500	8923800	7356000	8104200	7904800	9817200	8769200	11869000	9617600	9301600	6543100	9133200	8940400	12639000	13250000	8192900	12299000	11423000
XP_021451391.1;XP_021416281.1;XP_021427640.1	XP_021451391.1	XP_021451391.1 triosephosphate isomerase B-like [Oncorhynchus mykiss]	51400000	45398000	40672000	29982000	13129000	18411000	31142000	13933000	9604100	15341000	138060000	114030000	28446000	25738000	23155000	22276000	6118000	10569000	8787300	40661000	57564000	38573000	14193000	16675000	26070000	17218000	84636000	19193000	20194000	34971000	9280000	18097000	7311300	70861000	8620500	9611200	12398000	9084900	8239700	29450000	106630000	23917000	12303000	19151000	30924000	12973000	58472000
XP_021449351.1	XP_021449351.1	XP_021449351.1 complement C3 alpha chain-like [Oncorhynchus mykiss]	34139000	37662000	44754000	51242000	65665000	62267000	66354000	62091000	66617000	51033000	0	28287000	10472000	38211000	27743000	32680000	0	25524000	34006000	38509000	42652000	25349000	42071000	53036000	35126000	79950000	78109000	59109000	53427000	81062000	55603000	63685000	81465000	63481000	59599000	59995000	76941000	64330000	39095000	54466000	0	26565000	46074000	52306000	28440000	49364000	44699000
NP_001118067.1	NP_001118067.1	NP_001118067.1 complement factor B [Oncorhynchus mykiss]	36088000	34915000	31035000	31672000	42244000	32650000	31393000	36333000	26621000	30743000	27231000	32771000	27695000	28857000	29115000	31654000	36280000	26863000	28050000	30658000	57206000	77547000	54847000	67012000	65163000	56694000	64951000	83742000	78136000	87124000	68272000	73222000	55165000	70051000	85859000	84483000	56834000	80176000	65270000	68360000	27442000	52711000	34444000	32954000	41963000	32285000	30773000
XP_021421270.1;XP_021421269.1;XP_021421268.1	XP_021421270.1;XP_021421269.1;XP_021421268.1	XP_021421270.1 carboxypeptidase N catalytic chain isoform X3 [Oncorhynchus mykiss];XP_021421269.1 carboxypeptidase N catalytic chain isoform X2 [Oncorhynchus mykiss];XP_021421268.1 carboxypeptidase N catalytic chain isoform X1 [Oncorhynchus mykiss]	22273000	21144000	21683000	16739000	20783000	19584000	16872000	21782000	20986000	21447000	25047000	29253000	20482000	24106000	25757000	26759000	25337000	23877000	24421000	26961000	16270000	20481000	17921000	15709000	17714000	19128000	16668000	17740000	21556000	19483000	21718000	19252000	18380000	17250000	21907000	22503000	20420000	24637000	20105000	14941000	20842000	17621000	17424000	16795000	16664000	17957000	16003000
XP_021469499.1	XP_021469499.1	XP_021469499.1 catechol O-methyltransferase domain-containing protein 1-like [Oncorhynchus mykiss]	5687400	23065000	36449000	76369000	210700000	215890000	279220000	284500000	183900000	128100000	49812000	99680000	195600000	302470000	503290000	465200000	647190000	486470000	416960000	305830000	186580000	330440000	269990000	510140000	1100100000	1721600000	1733400000	1771600000	2072700000	2480700000	486670000	926430000	982030000	978990000	1050000000	899570000	622220000	702940000	490630000	531850000	133700000	248670000	243480000	271870000	295090000	314000000	295710000
XP_021456332.1	XP_021456332.1	XP_021456332.1 CD44 antigen-like [Oncorhynchus mykiss]	12065000	13233000	16563000	13328000	16653000	13868000	16828000	15861000	21663000	19918000	19006000	17889000	19414000	18920000	19678000	20917000	20859000	24407000	28839000	21045000	20870000	20857000	18432000	16832000	16821000	15823000	17518000	17178000	19178000	15685000	25993000	25714000	19503000	16154000	16593000	18886000	20562000	27181000	35113000	20753000	22542000	24115000	22942000	19722000	15860000	20364000	23163000
XP_021445773.1	XP_021445773.1	XP_021445773.1 pancreatic alpha-amylase-like [Oncorhynchus mykiss]	52685000	55548000	51745000	54889000	48083000	55634000	50939000	46023000	39388000	48524000	28578000	29743000	24390000	28716000	20418000	22377000	32778000	18407000	19374000	17142000	37868000	40633000	34871000	34986000	36525000	32371000	34114000	37792000	46205000	46594000	24042000	23901000	29873000	27529000	26043000	26269000	18339000	23718000	16207000	22383000	23771000	33922000	26679000	29486000	24205000	21291000	20148000
XP_021443373.1	XP_021443373.1	XP_021443373.1 creatine kinase M-type-like [Oncorhynchus mykiss]	51102000	37752000	50944000	55756000	23045000	11306000	22687000	9985800	6503700	13395000	60206000	84534000	22725000	20030000	20694000	12411000	0	0	0	36486000	24017000	22834000	11170000	13259000	18991000	8848600	45471000	12652000	10379000	19209000	4834500	10781000	7116700	40346000	9063000	6760800	7687700	0	0	17887000	44848000	12393000	6974100	13494000	21705000	6782800	32173000
XP_021422752.1;XP_021455224.1;XP_021455221.1;XP_021455226.1;XP_021455220.1;XP_021455225.1;XP_021455219.1;XP_021455223.1;XP_021455222.1;XP_021455218.1;XP_021455216.1;XP_021455215.1;XP_021455214.1;XP_021455213.1;XP_021455212.1;XP_021455211.1;XP_021455210.1	XP_021422752.1	XP_021422752.1 receptor-type tyrosine-protein phosphatase F-like [Oncorhynchus mykiss]	16657000	14045000	14796000	15761000	15626000	12919000	11721000	12773000	10732000	13829000	11053000	12518000	10691000	0	8488400	0	11968000	10397000	8969800	0	9816500	9352800	9455800	8801800	8144100	10357000	10711000	7777600	6486400	6732300	10397000	11103000	12698000	11590000	13109000	13806000	8539300	13556000	8586400	7899600	8532500	9957100	10113000	10022000	8008000	10004000	7403900
XP_021445743.1;XP_021445744.1	XP_021445743.1;XP_021445744.1	XP_021445743.1 uncharacterized protein LOC110509104 isoform X1 [Oncorhynchus mykiss];XP_021445744.1 uncharacterized protein LOC110509104 isoform X2 [Oncorhynchus mykiss]	25930000	32275000	24272000	27894000	22200000	39475000	31824000	36384000	27417000	29969000	53278000	47125000	54044000	35116000	42146000	69122000	66542000	50182000	41193000	41491000	26362000	27906000	23405000	20974000	21478000	31630000	27771000	30553000	33233000	32836000	20881000	21349000	33271000	26065000	32337000	27994000	18748000	24678000	21761000	27245000	31653000	41347000	34903000	25313000	26051000	22799000	23937000
XP_021462825.1	XP_021462825.1	XP_021462825.1 haptoglobin [Oncorhynchus mykiss]	34403000	66740000	78746000	105800000	155190000	94870000	96397000	77313000	46592000	88473000	19382000	68351000	67760000	119600000	148570000	59798000	73349000	35785000	30386000	64734000	21889000	78581000	29378000	110900000	92111000	116620000	81928000	229880000	143100000	286550000	13503000	159370000	26886000	34669000	23268000	17723000	15843000	27748000	19804000	64039000	20311000	148340000	51564000	45858000	35385000	47825000	41339000
XP_021476397.1;XP_021418667.1	XP_021476397.1;XP_021418667.1	XP_021476397.1 plexin domain-containing protein 2-like [Oncorhynchus mykiss];XP_021418667.1 plexin domain-containing protein 2 [Oncorhynchus mykiss]	20134000	0	0	12931000	11328000	11599000	10964000	12738000	15324000	11978000	14670000	12317000	10943000	12426000	7210400	11054000	21615000	12085000	16111000	11444000	21542000	14064000	10503000	8952000	12632000	15069000	15095000	13022000	10778000	8851700	14790000	11175000	11722000	9344700	8689500	10667000	15310000	13817000	12897000	10335000	13250000	11893000	14586000	8947600	14269000	11731000	12605000
XP_021438059.1	XP_021438059.1	XP_021438059.1 complement C4-like [Oncorhynchus mykiss]	38644000	48057000	52675000	39604000	38032000	40037000	35896000	28882000	30543000	32089000	25111000	26147000	24455000	21447000	24652000	33107000	30590000	20895000	26634000	13619000	35647000	48440000	35503000	25456000	31781000	30707000	30091000	32202000	47197000	46056000	40362000	42744000	48454000	33857000	31929000	33899000	26060000	33015000	36375000	26070000	28816000	31232000	27901000	27843000	27940000	28962000	37731000
XP_021448169.1;XP_021414491.1;XP_021411984.1	XP_021448169.1;XP_021414491.1;XP_021411984.1	XP_021448169.1 coagulation factor X-like [Oncorhynchus mykiss];XP_021414491.1 coagulation factor X-like [Oncorhynchus mykiss];XP_021411984.1 coagulation factor X-like [Oncorhynchus mykiss]	16686000	17786000	17821000	16172000	14606000	17029000	19309000	19628000	18322000	19902000	22959000	20861000	18457000	19758000	13959000	18317000	27535000	21073000	24341000	21950000	18786000	19379000	16816000	13594000	12888000	13608000	12751000	10717000	15206000	13050000	21987000	19982000	15296000	20315000	18971000	18564000	16822000	20747000	20997000	17534000	21082000	18443000	17676000	16119000	16834000	13858000	14993000
XP_021457257.1;NP_001118188.1	XP_021457257.1;NP_001118188.1	XP_021457257.1 lysozyme C II [Oncorhynchus mykiss];NP_001118188.1 lysozyme C II precursor [Oncorhynchus mykiss]	27758000	54334000	78547000	144460000	233600000	327750000	368020000	362070000	258700000	236640000	47232000	86061000	188660000	180760000	231080000	299430000	445480000	301360000	268680000	227450000	50415000	89781000	104260000	169170000	331010000	551830000	573790000	625540000	746020000	706140000	119520000	320500000	415220000	274250000	267770000	236550000	227380000	314010000	290530000	297730000	66786000	203980000	230670000	195630000	173850000	161510000	197000000
XP_021466629.1	XP_021466629.1	XP_021466629.1 neuropilin-2 [Oncorhynchus mykiss]	36143000	32966000	29802000	23319000	24330000	29698000	34237000	40653000	30548000	28716000	34646000	22739000	23572000	20572000	18426000	23686000	25887000	34144000	33031000	26952000	32436000	32867000	22625000	19026000	24112000	20109000	26768000	25976000	28220000	18243000	31220000	24924000	20651000	19802000	25794000	29618000	32156000	48571000	35693000	21900000	39430000	33550000	31765000	27773000	25797000	32057000	33213000
ABH09083.1;ABR26851.1;ABR26836.1;ABR26802.1;ABR26801.1;ABR26799.1;ABR26794.1;CDQ92955.1;ABR27148.1;ABR26863.1;ABR26793.1;ABR26792.1;ABR27190.1;ABR26797.1;ABR27159.1;ABR15644.1	ABH09083.1;ABR26851.1;ABR26836.1;ABR26802.1;ABR26801.1;ABR26799.1;ABR26794.1;CDQ92955.1;ABR27148.1;ABR26863.1;ABR26793.1;ABR26792.1;ABR27190.1;ABR26797.1	ABH09083.1 immunoglobulin mu heavy chain, partial [Oncorhynchus mykiss];ABR26851.1 immunoglobulin mu heavy chain, partial [Oncorhynchus mykiss];ABR26836.1 immunoglobulin mu heavy chain, partial [Oncorhynchus mykiss];ABR26802.1 immunoglobulin mu heavy chain, partial [Oncorhynchus mykiss];ABR26801.1 immunoglobulin mu heavy chain, partial [Oncorhynchus mykiss];ABR26799.1 immunoglobulin mu heavy chai…	52692000	56874000	45376000	49615000	40194000	36881000	55822000	74885000	79214000	76828000	37558000	39581000	25955000	27708000	17424000	22362000	32227000	38826000	50270000	24523000	41677000	31907000	32381000	26945000	29628000	30483000	43612000	46275000	42710000	32631000	22499000	23076000	21714000	17650000	18911000	23831000	33225000	47925000	40815000	33908000	69111000	73392000	65712000	68343000	62811000	79125000	75962000
XP_021414417.1;XP_021414425.1	XP_021414417.1;XP_021414425.1	XP_021414417.1 uncharacterized protein LOC110486889 isoform X1 [Oncorhynchus mykiss];XP_021414425.1 uncharacterized protein LOC110486889 isoform X2 [Oncorhynchus mykiss]	15353000	16628000	24363000	24421000	22640000	27303000	20569000	22162000	23012000	23495000	6066700	8402400	7809600	8184700	10430000	14610000	6558600	6479400	7210600	9979600	27693000	35524000	32369000	31528000	36517000	35993000	36578000	34280000	38047000	47292000	53777000	55368000	55782000	52814000	66871000	69847000	59012000	66224000	59892000	55164000	0	3255600	4659200	4622000	5178500	6511100	8746800
NP_001233251.1	NP_001233251.1	NP_001233251.1 properdin P factor complement 2 precursor [Oncorhynchus mykiss]	31636000	43044000	41695000	35983000	35835000	37614000	37412000	33358000	35469000	35321000	24199000	31784000	31948000	34335000	39341000	34394000	45133000	37725000	35032000	29434000	30392000	36532000	30366000	36073000	23272000	36372000	35955000	37034000	46831000	39416000	23267000	28430000	24718000	18301000	29260000	22532000	25934000	27842000	30542000	20888000	33659000	37570000	39399000	35331000	30855000	42686000	36289000
XP_021452373.1;XP_021419706.1	XP_021452373.1;XP_021419706.1	XP_021452373.1 complement C1q-like protein 2 [Oncorhynchus mykiss];XP_021419706.1 complement C1q-like protein 2 [Oncorhynchus mykiss]	23027000	20791000	23806000	22260000	25197000	29390000	28672000	26105000	24712000	22260000	35444000	24823000	29805000	31175000	30753000	31814000	0	29132000	22593000	25610000	24502000	19622000	18303000	22650000	19758000	15855000	16756000	8708200	17253000	31680000	22332000	18059000	22522000	26693000	0	27736000	25165000	23459000	26021000	18688000	0	0	21205000	17686000	0	27334000	13647000
XP_021454597.1	XP_021454597.1	XP_021454597.1 fibulin-1-like isoform X1 [Oncorhynchus mykiss]	26720000	25247000	21338000	19558000	20891000	24576000	19213000	26035000	20848000	21137000	19473000	16017000	19115000	18716000	15844000	17423000	21215000	20811000	16861000	18288000	17023000	18269000	12347000	14874000	15503000	15162000	10604000	11133000	15370000	11855000	21512000	21404000	17478000	17932000	24069000	24748000	23679000	27986000	22848000	17791000	17959000	16239000	12448000	15963000	15620000	13386000	13378000
XP_021411950.1	XP_021411950.1	XP_021411950.1 uncharacterized protein LOC110485215 [Oncorhynchus mykiss]	0	2367600	2876400	2876800	0	0	4919800	1801000	8267900	4860800	8119500	21709000	9317500	6829200	15002000	8414500	7164000	7218500	5399600	5917700	0	0	2564900	2613800	2865100	5886600	3114100	3781500	0	2433700	28875000	25843000	31833000	25064000	32415000	37934000	49680000	46589000	49895000	33918000	12613000	11319000	11726000	0	0	0	15433000
XP_021443470.1	XP_021443470.1	XP_021443470.1 periostin-like [Oncorhynchus mykiss]	14659000	13483000	12857000	18449000	14398000	14228000	9230300	6985400	6141500	7315100	5160200	8443200	3471600	6807500	5085400	6826800	1956500	8234600	8276300	7012700	15144000	6195200	7330400	5663300	7412000	5746600	6017000	5257000	3969400	5322700	15849000	9372200	8761700	14066000	17764000	17110000	14301000	9090100	7912200	10176000	13233000	7360000	7070200	5852200	9207600	5708600	5478700
XP_021453260.1;XP_021475427.1	XP_021453260.1	XP_021453260.1 plastin-2 [Oncorhynchus mykiss]	40995000	25553000	36205000	57057000	61336000	52439000	44302000	52540000	52562000	62596000	32156000	29083000	36644000	48034000	44094000	44631000	48634000	35515000	37672000	53578000	30839000	27962000	30692000	35149000	41073000	36895000	35942000	41970000	56225000	57137000	37603000	48063000	43843000	52482000	51919000	50310000	47199000	69034000	65278000	62200000	34696000	34748000	29368000	38570000	36603000	42047000	34971000
XP_021442907.1;XP_021442906.1	XP_021442907.1;XP_021442906.1	XP_021442907.1 coagulation factor IX-like isoform X2 [Oncorhynchus mykiss];XP_021442906.1 coagulation factor IX-like isoform X1 [Oncorhynchus mykiss]	30289000	13835000	13074000	35491000	46110000	17763000	26514000	26255000	33439000	25044000	57363000	19786000	31501000	27176000	17780000	30398000	0	32131000	53077000	28918000	36889000	42022000	42073000	37195000	43112000	32918000	28821000	31506000	30750000	24708000	32980000	31609000	36034000	35381000	43292000	40483000	32405000	44175000	31777000	31738000	23194000	26741000	19374000	20952000	31411000	22260000	20006000
XP_021460374.1	XP_021460374.1	XP_021460374.1 complement factor H-related protein 2-like [Oncorhynchus mykiss]	78593000	111320000	101240000	124250000	130100000	139160000	147640000	134550000	54911000	151560000	114940000	207780000	243580000	216110000	236040000	258370000	242560000	226120000	171850000	204360000	94065000	121120000	114880000	144430000	153670000	185320000	148800000	220680000	205770000	246350000	37868000	125970000	109490000	94692000	110120000	114420000	42583000	99119000	73084000	98298000	11170000	91710000	54081000	38611000	72628000	38537000	34616000
NP_001118176.1	NP_001118176.1	NP_001118176.1 cystatin precursor [Oncorhynchus mykiss]	51688000	44275000	35646000	24668000	24555000	25868000	37584000	38582000	50273000	35442000	34331000	40571000	33056000	29083000	26226000	41327000	4295100	35613000	30191000	37181000	66016000	49731000	59648000	37962000	30506000	66819000	62137000	52436000	40409000	59060000	58833000	40110000	42889000	28351000	25582000	31471000	72302000	49719000	46665000	44809000	28895000	41572000	55926000	38408000	19726000	36138000	49361000
XP_021433884.1	XP_021433884.1	XP_021433884.1 ependymin-like [Oncorhynchus mykiss]	29727000	23881000	25316000	18814000	22202000	21878000	14278000	19005000	17339000	18143000	18329000	17254000	13203000	14992000	18520000	15082000	22868000	19207000	20790000	18303000	32880000	33676000	26958000	21503000	26104000	23057000	23224000	28922000	27468000	26349000	16613000	14908000	15135000	15000000	15113000	18643000	11780000	18708000	14466000	11528000	22162000	19402000	17899000	17072000	17703000	19483000	21884000
XP_021417220.1	XP_021417220.1	XP_021417220.1 complement C3-like [Oncorhynchus mykiss]	34065000	65939000	68580000	80872000	141380000	122260000	126560000	118100000	83266000	78556000	24729000	59204000	71859000	86389000	110760000	88221000	120910000	58178000	39452000	39868000	16587000	38759000	28409000	44882000	52031000	57073000	59667000	80032000	85859000	94835000	27870000	85605000	56221000	52882000	52562000	52138000	36563000	25658000	24606000	35969000	40625000	173740000	145710000	136170000	131240000	110010000	107160000
ABR27100.1;ABR27089.1	ABR27100.1;ABR27089.1	ABR27100.1 immunoglobulin mu heavy chain, partial [Oncorhynchus mykiss];ABR27089.1 immunoglobulin mu heavy chain, partial [Oncorhynchus mykiss]	44417000	37805000	39326000	42267000	40466000	51261000	56734000	67209000	53998000	59388000	121440000	110000000	107840000	91041000	96157000	93823000	143190000	114190000	125940000	109980000	27271000	24505000	14496000	13842000	14628000	16289000	16549000	20951000	26645000	15868000	12793000	10791000	15656000	12194000	17680000	20048000	16440000	26294000	26736000	20246000	422790000	387880000	346030000	302010000	342210000	339970000	350710000
XP_021480081.1	XP_021480081.1	XP_021480081.1 uncharacterized protein LOC110537931 [Oncorhynchus mykiss]	19691000	42342000	33180000	27084000	25588000	30375000	26079000	19625000	42910000	29856000	30229000	24189000	36657000	34042000	35917000	27702000	0	29836000	42986000	30900000	43804000	37900000	67044000	61282000	47959000	58324000	44029000	26427000	36623000	35471000	58874000	47117000	68444000	68503000	44615000	53974000	48186000	56093000	51853000	80212000	38853000	31636000	62646000	66949000	85969000	49458000	53159000
XP_021445630.1	XP_021445630.1	XP_021445630.1 coagulation factor XIII B chain-like [Oncorhynchus mykiss]	55531000	73078000	55429000	68238000	70556000	95547000	71988000	81008000	66802000	68566000	0	44588000	42095000	44027000	46285000	44027000	64233000	35040000	37757000	33588000	35064000	39100000	34694000	41014000	34621000	71822000	57149000	52334000	39852000	57509000	45415000	46950000	66146000	45840000	42747000	39244000	82299000	44114000	30271000	37791000	15320000	30952000	55840000	45068000	17667000	32403000	31796000
CAB92242.1	CAB92242.1	CAB92242.1 immunoglobulin light chain variable region, partial [Oncorhynchus mykiss]	47983000	46759000	41875000	42904000	37168000	44067000	40496000	74975000	80295000	99857000	36919000	34156000	28869000	28147000	27592000	29394000	39558000	42907000	43476000	39042000	21178000	19527000	17631000	9823400	10950000	12016000	14962000	24925000	23636000	19895000	10707000	7588900	9704000	5277300	8059500	8415600	12946000	14658000	16677000	5915000	16049000	17225000	13477000	6508700	8319000	12036000	10896000
XP_021420857.1	XP_021420857.1	XP_021420857.1 uncharacterized protein LOC110491612 [Oncorhynchus mykiss]	31042000	32055000	28808000	20699000	19438000	24225000	14251000	12927000	14768000	20636000	25326000	25244000	25359000	18132000	19195000	14641000	6444800	29255000	20513000	25095000	32711000	31482000	27343000	22170000	23250000	14817000	16295000	15285000	14379000	13193000	28530000	24325000	20486000	22408000	26365000	29839000	23935000	27217000	30286000	19113000	34491000	26792000	23487000	20950000	22702000	21684000	23478000
XP_021416011.1	XP_021416011.1	XP_021416011.1 type-4 ice-structuring protein-like [Oncorhynchus mykiss]	33810000	20884000	31998000	59227000	32766000	46414000	39907000	27784000	25539000	29100000	33458000	28311000	26761000	49723000	31531000	38568000	0	29779000	28764000	42402000	19555000	23187000	24472000	29073000	19586000	37235000	19784000	0	10337000	11886000	28779000	18813000	27389000	54828000	70320000	51687000	34430000	23376000	22748000	29200000	22472000	11233000	18685000	16783000	25255000	15868000	15662000
XP_021464035.1;XP_021464034.1;XP_021464033.1;XP_021464032.1	XP_021464035.1;XP_021464034.1;XP_021464033.1;XP_021464032.1	XP_021464035.1 vitamin K-dependent protein Z-like [Oncorhynchus mykiss];XP_021464034.1 vitamin K-dependent protein Z-like [Oncorhynchus mykiss];XP_021464033.1 vitamin K-dependent protein Z-like [Oncorhynchus mykiss];XP_021464032.1 vitamin K-dependent protein Z-like [Oncorhynchus mykiss]	40701000	22957000	19062000	32434000	40671000	17622000	28769000	33503000	43165000	34844000	67833000	25555000	43826000	33675000	20697000	34869000	20850000	38989000	61671000	35053000	38415000	40088000	37724000	33213000	40320000	26513000	24272000	28352000	25417000	28025000	36613000	36320000	38162000	36909000	39408000	41564000	26805000	34727000	36616000	39682000	20471000	28842000	25450000	26676000	38015000	23335000	22962000
ACS94421.1	ACS94421.1	ACS94421.1 immunoglobulin light chain III variable region [Oncorhynchus mykiss]	17790000	18948000	20232000	17163000	18446000	19046000	26117000	33163000	42687000	41459000	43725000	32692000	39386000	31238000	33156000	34606000	54213000	44536000	47708000	43001000	19945000	27399000	24294000	18112000	16797000	16418000	18961000	21627000	23001000	20165000	23436000	27532000	18897000	16849000	19334000	19632000	25490000	31191000	54656000	38449000	93464000	88974000	77252000	63323000	56464000	56726000	68576000
XP_021414840.1;XP_021449631.1	XP_021414840.1	XP_021414840.1 cathepsin S-like [Oncorhynchus mykiss]	48984000	50847000	44953000	35447000	33668000	36440000	32107000	37994000	27956000	35984000	24652000	25911000	17405000	17012000	14973000	15400000	31958000	17966000	22892000	20095000	27874000	33019000	25237000	24075000	24598000	27899000	28375000	29341000	29440000	25143000	34667000	29411000	33064000	31697000	36870000	36096000	28113000	39220000	26689000	24547000	19114000	20175000	17091000	16798000	18318000	17752000	18034000
ABR27005.1;ABR27078.1;ABR27069.1;ABR15712.1;ABR15710.1;ABR27077.1;ABR27072.1;ABR26831.1;ABR15660.1;ABR15562.1;ABR15555.1;ABH09036.1;ABR27034.1;ABR26963.1;ABR15615.1;ABR27093.1;ABR15654.1	ABR27005.1;ABR27078.1;ABR27069.1;ABR15712.1;ABR15710.1;ABR27077.1;ABR27072.1;ABR26831.1;ABR15660.1;ABR15562.1;ABR15555.1;ABH09036.1;ABR27034.1;ABR26963.1;ABR15615.1;ABR27093.1;ABR15654.1	ABR27005.1 immunoglobulin mu heavy chain, partial [Oncorhynchus mykiss];ABR27078.1 immunoglobulin mu heavy chain, partial [Oncorhynchus mykiss];ABR27069.1 immunoglobulin mu heavy chain, partial [Oncorhynchus mykiss];ABR15712.1 immunoglobulin mu heavy chain, partial [Oncorhynchus mykiss];ABR15710.1 immunoglobulin mu heavy chain, partial [Oncorhynchus mykiss];ABR27077.1 immunoglobulin mu heavy chai…	49964000	38588000	40830000	39655000	36088000	39900000	51557000	69439000	71466000	72307000	174500000	158690000	139200000	139600000	113570000	115560000	202880000	161410000	175640000	160620000	22917000	10526000	10345000	9295200	10077000	21242000	17312000	15287000	23697000	21240000	20653000	45150000	25537000	26661000	23191000	39229000	70267000	96775000	109030000	119790000	22737000	47463000	54622000	32563000	22044000	46579000	47512000
XP_021480396.1	XP_021480396.1	XP_021480396.1 nucleoside diphosphate kinase B-like [Oncorhynchus mykiss]	60477000	47340000	53007000	73178000	44987000	54092000	41123000	27474000	32986000	32650000	24855000	26455000	7867200	24454000	17724000	14891000	7236300	8950000	11777000	20705000	40174000	26097000	20023000	44162000	24806000	54631000	54297000	26470000	21671000	37376000	16040000	18784000	22445000	18028000	10646000	10740000	30580000	8852600	8132900	17718000	30931000	15942000	16596000	20962000	22388000	15363000	32011000
XP_021423341.1	XP_021423341.1	XP_021423341.1 fibulin-1-like [Oncorhynchus mykiss]	42205000	42877000	36166000	30237000	32973000	34135000	32364000	31535000	33255000	30367000	40481000	27531000	24580000	23913000	24333000	21444000	40745000	33667000	29123000	27753000	29667000	27978000	24223000	23185000	19437000	18827000	22489000	16009000	18110000	15826000	29313000	28699000	22760000	25316000	24791000	29346000	26845000	35805000	20633000	18795000	28166000	29454000	31761000	26166000	30744000	30458000	25447000
XP_021421228.1;XP_021481742.1;XP_021455525.1	XP_021421228.1	XP_021421228.1 fructose-bisphosphate aldolase A [Oncorhynchus mykiss]	95112000	109700000	130080000	106880000	33939000	42562000	77816000	30397000	16057000	56162000	230670000	201070000	24443000	48243000	41605000	27554000	0	4947700	6987800	94694000	111660000	76093000	15621000	20299000	39038000	35924000	246740000	21208000	10997000	55356000	10712000	26938000	0	139320000	13178000	0	19295000	0	4913500	44909000	202140000	45739000	31977000	58057000	51270000	20962000	162930000
XP_021447067.1	XP_021447067.1	XP_021447067.1 lipocalin-like [Oncorhynchus mykiss]	61942000	55242000	52658000	49092000	38026000	57879000	54259000	51365000	37514000	40118000	38582000	42248000	43754000	29018000	32470000	37573000	63733000	34271000	42063000	36915000	56237000	83589000	65497000	48544000	45787000	46511000	51410000	57692000	58237000	54604000	63484000	64713000	51486000	51282000	66221000	61486000	58102000	56641000	64907000	53728000	57434000	63853000	51902000	51834000	50302000	55348000	49500000
XP_021466807.1	XP_021466807.1	XP_021466807.1 multiple inositol polyphosphate phosphatase 1-like [Oncorhynchus mykiss]	40373000	34479000	38452000	41316000	40348000	35707000	32494000	30758000	31111000	34226000	38941000	35668000	31014000	32753000	35915000	34648000	28728000	28228000	29395000	32966000	40947000	41941000	36229000	39078000	36860000	36408000	31917000	30787000	31471000	37102000	33674000	37787000	37907000	37653000	45135000	43925000	46284000	50995000	35150000	35366000	28456000	31866000	35818000	37433000	37799000	38894000	37093000
NP_001117661.1;XP_021463403.1;XP_021439601.1;XP_021439600.1	NP_001117661.1;XP_021463403.1	NP_001117661.1 matrix metalloproteinase-2 precursor [Oncorhynchus mykiss];XP_021463403.1 72 kDa type IV collagenase-like [Oncorhynchus mykiss]	48385000	39361000	40097000	35681000	36371000	43239000	35637000	33287000	37370000	40133000	44162000	41940000	42270000	37201000	45696000	45220000	50811000	37822000	40827000	38047000	35946000	34360000	27460000	24967000	28971000	26503000	25856000	30991000	32135000	32268000	39693000	33171000	33508000	31266000	27450000	39496000	29375000	36519000	36483000	33338000	40821000	36451000	33226000	33906000	31767000	31832000	34828000
XP_021473429.1;XP_021479532.1;XP_021473430.1;XP_021440681.1	XP_021473429.1;XP_021479532.1;XP_021473430.1	XP_021473429.1 creatine kinase M-type isoform X1 [Oncorhynchus mykiss];XP_021479532.1 creatine kinase M-type-like [Oncorhynchus mykiss];XP_021473430.1 creatine kinase M-type isoform X2 [Oncorhynchus mykiss]	150360000	105540000	112750000	127160000	48196000	24280000	52459000	20596000	18093000	35193000	172800000	235180000	50651000	45704000	42521000	35880000	5763400	20315000	13250000	115610000	66076000	54169000	22140000	34584000	44966000	23007000	133030000	31324000	24690000	55608000	7974000	22140000	9939500	103970000	15235000	6930100	27350000	0	0	53320000	117070000	31551000	25135000	42580000	58589000	19336000	90306000
XP_021436350.1	XP_021436350.1	XP_021436350.1 uncharacterized protein LOC110502557 [Oncorhynchus mykiss]	97146000	142770000	193900000	216630000	353890000	286040000	349070000	342570000	309450000	303990000	118060000	184750000	292910000	338870000	479120000	426360000	573590000	376990000	295130000	267280000	83909000	109310000	94671000	156740000	231640000	281440000	268780000	350710000	366190000	423520000	118480000	203820000	159350000	150270000	140150000	133980000	131460000	117960000	139880000	167720000	141840000	279510000	265150000	268290000	237500000	251210000	267180000
XP_021480058.1	XP_021480058.1	XP_021480058.1 apolipoprotein A-IV-like [Oncorhynchus mykiss]	24320000	30530000	41184000	55959000	42786000	70741000	51145000	22277000	45188000	47253000	32179000	32497000	42188000	62270000	64260000	55442000	0	27207000	68233000	64531000	103180000	94044000	134100000	132210000	113400000	156560000	77335000	36798000	56489000	57642000	90109000	67791000	75352000	108430000	137970000	107520000	77639000	61208000	71687000	94797000	59966000	49845000	65426000	72686000	82383000	66973000	51019000
XP_021449477.1	XP_021449477.1	XP_021449477.1 fucolectin-1-like [Oncorhynchus mykiss]	58788000	58626000	60631000	56834000	56659000	59919000	56119000	58555000	53687000	54771000	48975000	54288000	50596000	52066000	58545000	59440000	79395000	61458000	64707000	56110000	20242000	29421000	21631000	21075000	22505000	20734000	28725000	29304000	28370000	29070000	63841000	64813000	53323000	61403000	65208000	68664000	52605000	66745000	57629000	43859000	26333000	24009000	17174000	20572000	26151000	25850000	19406000
XP_021422626.1	XP_021422626.1	XP_021422626.1 complement C1q tumor necrosis factor-related protein 3 [Oncorhynchus mykiss]	161750000	526330000	464510000	378390000	333640000	357050000	300870000	276970000	161440000	201280000	72383000	172120000	202410000	192200000	125880000	104960000	50551000	56504000	57800000	57523000	70608000	209980000	161340000	206430000	177980000	158990000	138220000	238390000	282530000	242790000	273480000	498840000	519940000	311490000	239090000	188330000	109500000	122520000	109470000	220990000	50342000	400200000	419720000	264850000	184840000	115120000	58772000
XP_021419888.1	XP_021419888.1	XP_021419888.1 inter-alpha-trypsin inhibitor heavy chain H2 [Oncorhynchus mykiss]	77083000	69806000	68150000	83275000	83107000	82587000	74908000	70404000	57817000	68915000	68524000	68649000	59872000	72699000	82933000	87110000	34176000	73124000	64403000	66390000	93540000	95753000	87984000	90020000	81424000	88158000	97537000	92583000	82734000	80666000	87100000	64237000	86880000	91182000	134220000	117170000	77890000	93961000	79617000	68271000	45296000	53168000	64861000	56906000	65347000	65813000	54885000
CAA46364.1;CDQ86267.1;ABR24211.1;ABR24207.1	CAA46364.1;CDQ86267.1;ABR24211.1;ABR24207.1	CAA46364.1 secretory form of immunoglobulin heavy chain, variable region, partial [Oncorhynchus mykiss];CDQ86267.1 unnamed protein product [Oncorhynchus mykiss];ABR24211.1 immunoglobulin mu heavy chain, partial [Oncorhynchus mykiss];ABR24207.1 immunoglobulin mu heavy chain, partial [Oncorhynchus mykiss]	61873000	57688000	54230000	57352000	49770000	58136000	51607000	66167000	86291000	63471000	192920000	176620000	171010000	157930000	139140000	146300000	247320000	192210000	182320000	170980000	13110000	13575000	9074500	10480000	0	9602700	10190000	9050200	11605000	9899200	43377000	40568000	33356000	35555000	31777000	37113000	67265000	52356000	85538000	63426000	63998000	71837000	56767000	54050000	48710000	71038000	85268000
XP_021461250.1	XP_021461250.1	XP_021461250.1 lipocalin-like [Oncorhynchus mykiss]	84545000	76406000	74823000	72521000	70004000	55393000	66656000	61825000	57590000	0	61979000	59243000	58743000	55278000	57968000	60523000	79887000	65386000	59126000	52897000	56244000	67256000	55630000	49200000	55022000	42595000	51236000	56755000	55965000	36006000	63379000	56689000	63054000	64962000	69457000	69781000	58667000	69055000	66392000	49464000	45995000	51296000	41355000	45770000	49662000	49693000	42986000
XP_021424234.1	XP_021424234.1	XP_021424234.1 phosphatidylcholine-sterol acyltransferase-like [Oncorhynchus mykiss]	83256000	77406000	65921000	55645000	59937000	57954000	56605000	66077000	66568000	59097000	100250000	84087000	74386000	74267000	66449000	59210000	81106000	69930000	75643000	63569000	61923000	58625000	52698000	50131000	41242000	65075000	54659000	49948000	48846000	52961000	53357000	52616000	57346000	44676000	48345000	49950000	56553000	57685000	48250000	36762000	46138000	54876000	57491000	47095000	48221000	51317000	49226000
XP_021466853.1;XP_021424131.1;XP_021424130.1;XP_021424129.1	XP_021466853.1	XP_021466853.1 phospholipid transfer protein [Oncorhynchus mykiss]	38942000	34351000	30376000	31392000	33166000	29209000	23254000	26415000	28975000	26742000	13967000	16523000	16654000	16586000	18544000	16682000	5743100	21962000	23744000	21405000	24187000	21257000	24236000	19553000	25542000	25604000	25643000	22607000	24303000	23157000	38344000	30086000	41049000	42359000	37098000	38762000	59744000	56428000	44572000	35428000	26725000	35640000	42846000	37111000	33906000	51873000	40099000
NP_001117855.1	NP_001117855.1	NP_001117855.1 chitinase precursor [Oncorhynchus mykiss]	94182000	76964000	87392000	95334000	105440000	110610000	116940000	140400000	127230000	130030000	86464000	74170000	74535000	86771000	98656000	94374000	159990000	111150000	111340000	103590000	53761000	60178000	55642000	64329000	73151000	63823000	77454000	98626000	105870000	103940000	72559000	91094000	79796000	82968000	97890000	97821000	94833000	130910000	131120000	110190000	66777000	85798000	79346000	80552000	98127000	96705000	87159000
XP_021447385.1	XP_021447385.1	XP_021447385.1 complement C1q subcomponent subunit A-like [Oncorhynchus mykiss]	62288000	56190000	57116000	55082000	65829000	67662000	62335000	70260000	65450000	71767000	62833000	77558000	64571000	58928000	78580000	67915000	86507000	70685000	77669000	70535000	73494000	76721000	59097000	46974000	56019000	61549000	55582000	60969000	47480000	49397000	62120000	59875000	48635000	61444000	60493000	77511000	72575000	71055000	62886000	47045000	51253000	63929000	46277000	55935000	59806000	57566000	53544000
XP_021459113.1;XP_021459112.1	XP_021459113.1;XP_021459112.1	XP_021459113.1 antithrombin-III-like isoform X2 [Oncorhynchus mykiss];XP_021459112.1 antithrombin-III-like isoform X1 [Oncorhynchus mykiss]	53171000	77322000	62154000	67955000	53696000	78881000	76088000	51842000	75905000	46082000	28929000	42956000	34171000	36852000	48176000	37644000	58431000	53614000	82594000	73925000	130010000	142560000	124030000	104380000	78886000	105300000	124470000	107780000	92672000	100750000	167800000	153320000	157730000	151070000	101740000	172050000	142800000	129580000	104040000	103220000	128030000	75310000	107200000	81214000	89016000	109920000	106720000
XP_021477306.1;XP_021461768.1	XP_021477306.1	XP_021477306.1 transcobalamin-2 [Oncorhynchus mykiss]	98773000	76690000	80994000	76048000	74539000	73484000	49743000	58348000	47030000	51692000	72875000	54435000	47725000	56860000	58445000	61626000	37814000	47755000	47102000	49437000	86285000	78922000	72549000	67348000	60116000	64006000	59853000	51451000	42606000	42344000	71178000	54240000	52880000	54546000	79314000	84651000	71122000	64113000	64168000	45334000	58260000	52276000	46629000	53681000	60414000	55519000	50150000
XP_021441699.1;XP_021441698.1;XP_021441697.1	XP_021441699.1;XP_021441698.1;XP_021441697.1	XP_021441699.1 haptoglobin-like isoform X3 [Oncorhynchus mykiss];XP_021441698.1 haptoglobin-like isoform X2 [Oncorhynchus mykiss];XP_021441697.1 haptoglobin-like isoform X1 [Oncorhynchus mykiss]	113020000	183910000	220880000	244160000	407780000	273660000	285610000	243640000	148390000	237070000	65906000	203780000	247130000	305370000	475660000	239950000	225090000	140920000	143640000	188080000	44275000	185990000	66716000	211720000	225320000	271810000	180800000	487590000	415040000	647090000	53357000	392370000	47102000	81982000	62396000	54566000	24058000	66687000	77967000	185450000	55865000	390270000	136030000	154500000	172620000	164430000	174840000
XP_021449253.1	XP_021449253.1	XP_021449253.1 olfactomedin-4-like [Oncorhynchus mykiss]	81115000	106920000	99390000	111210000	99313000	76536000	103820000	109740000	117790000	100060000	35543000	61086000	78328000	45374000	45682000	65686000	36674000	80849000	103220000	64341000	54278000	71520000	139860000	162880000	241700000	113120000	76330000	75545000	97171000	88985000	53909000	64879000	91691000	114650000	72521000	97695000	72649000	119020000	149260000	275840000	67622000	73284000	45918000	64957000	177530000	61360000	86461000
AAA56663.1	AAA56663.1	AAA56663.1 IgM heavy chain membrane bound form [Oncorhynchus mykiss]	28632000	17563000	20024000	21947000	25522000	25368000	31712000	41160000	49815000	45522000	33997000	35182000	35112000	29467000	24382000	37210000	43205000	44865000	52576000	40492000	39927000	47295000	31125000	42101000	26255000	54600000	54672000	46637000	45060000	31826000	47710000	34472000	36100000	30981000	27504000	33888000	59200000	67316000	59650000	46614000	39401000	45820000	48646000	52562000	36980000	58686000	66069000
XP_021445586.1	XP_021445586.1	XP_021445586.1 carboxypeptidase N subunit 2-like [Oncorhynchus mykiss]	73040000	69518000	78172000	68325000	69387000	67291000	68369000	73586000	79839000	77921000	67705000	90914000	77665000	81384000	92147000	92074000	41957000	95956000	87404000	82940000	55422000	62052000	53571000	48540000	58589000	56639000	57854000	63781000	66203000	64461000	80813000	73973000	95743000	78757000	78076000	85083000	74307000	86714000	64797000	54668000	51863000	58012000	54549000	53696000	52598000	61914000	57672000
XP_021465005.1	XP_021465005.1	XP_021465005.1 hepatocyte growth factor-like protein [Oncorhynchus mykiss]	53085000	50024000	59050000	56509000	68019000	65804000	65392000	68580000	62350000	61828000	53502000	45013000	51868000	56853000	54151000	70075000	82796000	59098000	51116000	54438000	57462000	68893000	60600000	61027000	59485000	70084000	72686000	73184000	80179000	88242000	71484000	79480000	79513000	71011000	74766000	72796000	74814000	75863000	77280000	66616000	51063000	62372000	75910000	72964000	56781000	74872000	70316000
XP_021477053.1;XP_021477052.1	XP_021477053.1;XP_021477052.1	XP_021477053.1 A disintegrin and metalloproteinase with thrombospondin motifs 13 isoform X2 [Oncorhynchus mykiss];XP_021477052.1 A disintegrin and metalloproteinase with thrombospondin motifs 13 isoform X1 [Oncorhynchus mykiss]	60304000	56019000	54895000	45887000	44839000	43726000	46919000	46898000	40944000	42499000	63981000	54283000	42798000	46476000	37864000	32786000	49808000	45427000	50021000	45306000	49028000	49543000	42109000	35284000	40932000	34891000	37276000	35620000	28373000	25318000	48010000	34831000	36032000	37230000	44690000	46390000	39095000	41921000	39789000	27407000	43583000	42995000	40966000	38741000	38954000	41749000	40488000
XP_021477514.1;XP_021451343.1	XP_021477514.1	XP_021477514.1 serum albumin 2-like [Oncorhynchus mykiss]	56568000	38367000	39138000	36772000	34212000	36908000	33754000	38220000	38522000	38159000	65060000	67314000	44900000	56603000	47460000	51974000	72547000	50196000	58576000	48556000	60825000	62642000	52882000	46821000	44498000	32320000	33340000	30743000	41105000	32378000	41532000	31622000	36926000	34950000	35524000	41155000	30253000	38091000	50539000	37564000	72897000	62849000	48627000	47341000	49791000	47594000	46844000
XP_021467158.1;XP_021467157.1	XP_021467158.1;XP_021467157.1	XP_021467158.1 complement C1q-like protein 2 isoform X2 [Oncorhynchus mykiss];XP_021467157.1 complement C1q-like protein 2 isoform X1 [Oncorhynchus mykiss]	41302000	42580000	51729000	100440000	151950000	168270000	181160000	169950000	126760000	124290000	95240000	126970000	195360000	259880000	340940000	329230000	393380000	303520000	272820000	250230000	85174000	111960000	97067000	155130000	232260000	201400000	226220000	275220000	307720000	286090000	138350000	188840000	185240000	199090000	225630000	206740000	108790000	170310000	147770000	152800000	86451000	151280000	125490000	135440000	145920000	141660000	132320000
XP_021454889.1;XP_021459757.1;XP_021459756.1	XP_021454889.1	XP_021454889.1 sulfhydryl oxidase 1-like [Oncorhynchus mykiss]	68201000	65439000	60197000	63132000	55301000	62327000	58064000	60938000	52491000	60083000	82923000	68638000	73567000	75270000	68271000	61718000	90288000	80630000	72307000	69182000	71033000	71378000	60266000	52123000	49617000	54099000	52930000	56781000	51199000	48690000	66658000	61678000	63529000	60913000	76085000	78870000	60127000	68776000	72367000	55731000	66382000	59018000	64455000	67781000	59708000	66645000	61349000
XP_021433517.1;XP_021472765.1;XP_021478030.1	XP_021433517.1	XP_021433517.1 coagulation factor XIII A chain-like [Oncorhynchus mykiss]	84931000	59856000	56762000	55593000	57841000	47138000	33481000	40747000	30234000	38178000	84944000	66752000	76357000	85684000	37427000	85977000	12579000	50634000	43545000	46295000	49772000	51458000	45445000	36642000	34173000	28525000	28469000	22732000	25766000	17670000	75787000	66857000	58599000	51063000	58288000	57781000	58918000	67106000	53329000	36110000	112750000	50598000	48482000	56604000	42592000	62305000	58689000
XP_021479503.1;XP_021450444.1;XP_021449371.1;XP_021423150.1	XP_021479503.1;XP_021450444.1;XP_021449371.1	XP_021479503.1 histone H2A-like [Oncorhynchus mykiss];XP_021450444.1 histone H2A [Oncorhynchus mykiss];P_021449371.1 histone H2A [Oncorhynchus mykiss]	81023000	19066000	18040000	14590000	62220000	71517000	48383000	24917000	17496000	23659000	186460000	224530000	163890000	112860000	14401000	377720000	92387000	46108000	27785000	18245000	70167000	26579000	22062000	27466000	12560000	18575000	30426000	8967600	97366000	48232000	17151000	7286700	22546000	22394000	17996000	36892000	102590000	72080000	14118000	25141000	418350000	9779400	9783600	18250000	25331000	119950000	71965000
XP_021451455.1;NP_001117707.1;XP_021448752.1;XP_021448349.1;XP_021451454.1;XP_021448753.1;XP_021413122.1;XP_021413121.1;XP_021413119.1;XP_021413118.1;XP_021413117.1;XP_021413116.1	XP_021451455.1;NP_001117707.1;XP_021448752.1;XP_021448349.1;XP_021451454.1;XP_021448753.1	XP_021451455.1 actin, cytoplasmic 1 isoform X2 [Oncorhynchus mykiss];NP_001117707.1 actin beta [Oncorhynchus mykiss];XP_021448752.1 actin, cytoplasmic 1-like isoform X1 [Oncorhynchus mykiss];XP_021448349.1 actin, cytoplasmic 1-like [Oncorhynchus mykiss];XP_021451454.1 actin, cytoplasmic 1 isoform X1 [Oncorhynchus mykiss];XP_021448753.1 actin, cytoplasmic 1-like isoform X2 [Oncorhynchus mykiss]	68757000	33584000	51835000	67515000	92551000	65856000	41107000	57973000	40499000	51437000	64642000	32375000	74413000	89554000	27123000	143070000	17952000	33201000	36644000	36418000	50461000	41639000	53759000	58040000	46388000	53148000	48870000	56303000	69642000	68227000	47688000	46493000	49837000	68824000	35633000	36114000	59497000	52300000	47412000	77463000	204090000	31907000	40696000	60280000	33543000	80844000	54949000
XP_021423766.1;XP_021480682.1	XP_021423766.1	XP_021423766.1 N-acetylmuramoyl-L-alanine amidase-like [Oncorhynchus mykiss]	60867000	55892000	63159000	61928000	71807000	62806000	62727000	68618000	66017000	62889000	50648000	57392000	59690000	66491000	70953000	62676000	99878000	59124000	67076000	59499000	95434000	106040000	98271000	89787000	107470000	104390000	101720000	120010000	124770000	118860000	107460000	137820000	131350000	111080000	112850000	109860000	118240000	122330000	116710000	100630000	81516000	121110000	115480000	100930000	92070000	97855000	94552000
XP_021424446.1	XP_021424446.1	XP_021424446.1 olfactomedin-4-like [Oncorhynchus mykiss]	85184000	121520000	113570000	126220000	150890000	107930000	141650000	157080000	172040000	136720000	76241000	100360000	129160000	93347000	90817000	125050000	89099000	151090000	190180000	138240000	53881000	77791000	141550000	180240000	279460000	117540000	85157000	78726000	108900000	92370000	64905000	84639000	101220000	115030000	88381000	90729000	74209000	138590000	165160000	321770000	70462000	77438000	54003000	67680000	174660000	76178000	91071000
XP_021428691.1	XP_021428691.1	XP_021428691.1 coagulation factor VII-like, partial [Oncorhynchus mykiss]	39637000	37538000	43523000	49060000	40733000	34792000	44346000	38250000	46448000	48891000	34212000	34742000	36516000	42027000	21863000	30324000	28367000	32926000	43925000	46128000	57912000	65452000	64527000	65358000	55255000	43307000	57552000	56047000	50131000	53479000	93267000	62803000	79898000	86579000	98016000	102930000	76707000	83890000	74373000	79568000	70399000	91076000	106250000	77914000	78859000	97570000	97554000
XP_021451946.1	XP_021451946.1	XP_021451946.1 complement C4-like, partial [Oncorhynchus mykiss]	67209000	89375000	95746000	109400000	108760000	86698000	100590000	87191000	121160000	92222000	54548000	111160000	89584000	123340000	115760000	101580000	89655000	93544000	93405000	118330000	40309000	26318000	42992000	45390000	35094000	58022000	54027000	45701000	45866000	59324000	98170000	95770000	110940000	80171000	86165000	79760000	154500000	82090000	53824000	65389000	31263000	62861000	89079000	72209000	49113000	90667000	77412000
NP_001117852.1	NP_001117852.1	NP_001117852.1 complement C1r subcomponent precursor [Oncorhynchus mykiss]	100190000	99135000	86074000	90906000	95133000	98115000	107240000	97486000	90191000	94286000	75412000	83303000	96723000	84450000	91960000	84538000	85433000	83047000	81137000	100010000	106700000	93324000	94378000	93628000	97721000	109490000	95841000	104770000	93448000	111590000	86740000	91427000	91711000	72602000	93651000	98455000	96695000	109870000	87539000	85657000	79521000	89620000	74567000	69132000	74416000	65928000	55880000
XP_021461878.1;XP_021458680.1;XP_021478425.1;XP_021459211.1;XP_021424632.1	XP_021461878.1	XP_021461878.1 thrombospondin-4-B-like [Oncorhynchus mykiss]	119970000	120740000	133670000	100440000	111780000	155890000	127240000	118890000	107160000	107480000	81239000	67792000	94290000	74505000	86710000	105360000	77099000	90295000	85973000	80419000	78055000	89706000	70928000	52084000	57327000	67348000	61115000	56750000	69148000	51222000	63891000	63838000	64218000	65037000	84591000	87899000	59534000	77189000	68877000	52336000	76186000	87277000	75524000	59481000	80580000	71682000	64678000
XP_021437612.1;XP_021442610.1	XP_021437612.1;XP_021442610.1	XP_021437612.1 latexin-like [Oncorhynchus mykiss];XP_021442610.1 latexin-like [Oncorhynchus mykiss]	115760000	102600000	93473000	80584000	82559000	77817000	65375000	67177000	64350000	66691000	102720000	90262000	89355000	81874000	76256000	82647000	99496000	84733000	74303000	84880000	111410000	114950000	87009000	92370000	88966000	84509000	74188000	68779000	66773000	68915000	130400000	113650000	114540000	94200000	98671000	103050000	122450000	101470000	120800000	94065000	121400000	103170000	94572000	100460000	89657000	92323000	87324000
XP_021467147.1	XP_021467147.1	XP_021467147.1 uncharacterized protein LOC110529338 [Oncorhynchus mykiss]	113970000	126190000	120480000	86176000	82334000	96031000	94820000	93999000	103580000	90685000	109160000	126670000	115960000	86087000	97165000	91277000	139270000	82547000	105070000	88695000	129780000	163510000	127470000	104010000	84306000	77122000	107030000	142140000	168270000	145250000	119270000	156620000	133290000	110840000	105900000	116270000	93629000	115750000	117700000	116050000	134440000	162570000	143010000	135420000	120790000	109370000	103090000
XP_021447328.1;XP_021475437.1;XP_021452042.1	XP_021447328.1	XP_021447328.1 periostin [Oncorhynchus mykiss]	60257000	46473000	32109000	35089000	22105000	37174000	23717000	32927000	28738000	24000000	32910000	17292000	21801000	18229000	15955000	17984000	30327000	16406000	31868000	23925000	44537000	40861000	44599000	36808000	21011000	21379000	9117900	10364000	6486600	0	42386000	30134000	28847000	33238000	32821000	41375000	42686000	35546000	22790000	21619000	72478000	45931000	52013000	36317000	46379000	26530000	23201000
XP_021457661.1;XP_021457660.1;XP_021457662.1;XP_021456960.1	XP_021457661.1;XP_021457660.1;XP_021457662.1;XP_021456960.1	XP_021457661.1 apolipoprotein A-IV-like [Oncorhynchus mykiss];XP_021457660.1 apolipoprotein A-IV-like [Oncorhynchus mykiss];XP_021457662.1 apolipoprotein A-IV-like [Oncorhynchus mykiss];XP_021456960.1 apolipoprotein A-IV-like, partial [Oncorhynchus mykiss]	53446000	38023000	98425000	134890000	75002000	86566000	52907000	21652000	46286000	70482000	91554000	45899000	136360000	165390000	98397000	106570000	5696200	26791000	65017000	115570000	59607000	67484000	146720000	150680000	99295000	99803000	47072000	19180000	35484000	43254000	63048000	40022000	91584000	130680000	175580000	103440000	49634000	38683000	58221000	109480000	68161000	48887000	66523000	80306000	85029000	48957000	37875000
XP_021429234.1;XP_021429233.1	XP_021429234.1;XP_021429233.1	XP_021429234.1 fibrinogen gamma chain-like isoform X2 [Oncorhynchus mykiss];XP_021429233.1 fibrinogen gamma chain-like isoform X1 [Oncorhynchus mykiss]	254690000	174020000	145690000	113970000	85995000	179690000	167400000	162960000	154440000	142920000	114610000	70262000	61929000	43849000	39737000	85162000	123180000	78984000	56532000	75359000	243390000	180860000	127680000	142660000	84218000	207120000	179090000	165850000	122860000	169940000	155620000	103680000	132700000	115710000	174430000	182990000	161230000	165380000	132770000	131560000	90253000	100430000	97405000	89475000	103560000	139830000	148770000
XP_021416862.1	XP_021416862.1	XP_021416862.1 saxitoxin and tetrodotoxin-binding protein 2-like, partial [Oncorhynchus mykiss]	26788000	39161000	53438000	105070000	201560000	210350000	250930000	234920000	161090000	187360000	67316000	84119000	136160000	162020000	209060000	189180000	275380000	209850000	173940000	161470000	129410000	213520000	176170000	295320000	473870000	568540000	582580000	777420000	879400000	1048700000	342620000	671860000	635440000	544560000	534840000	511470000	392010000	399840000	353470000	313080000	231120000	314300000	273410000	294520000	293630000	268150000	297170000
NP_001117880.1	NP_001117880.1	NP_001117880.1 complement component C8 gamma chain precursor [Oncorhynchus mykiss]	93799000	108890000	94498000	114100000	119000000	114030000	110650000	107970000	108530000	99150000	64995000	84061000	88650000	97066000	100340000	101310000	125850000	98410000	98701000	96584000	85953000	93180000	107240000	98429000	90877000	70419000	77435000	103690000	99290000	96420000	85785000	88174000	75375000	88976000	91553000	97807000	70373000	109280000	111280000	108770000	76545000	98980000	62968000	87196000	90000000	103260000	90310000
XP_021448892.1;XP_021449610.1;XP_021448780.1;XP_021423148.1;XP_021451437.1;XP_021451525.1;XP_021450475.1	XP_021448892.1;XP_021449610.1;XP_021448780.1;XP_021423148.1;XP_021451437.1	XP_021448892.1 histone H2B-like, partial [Oncorhynchus mykiss];XP_021449610.1 histone H2B-like [Oncorhynchus mykiss];XP_021448780.1 histone H2B [Oncorhynchus mykiss];XP_021423148.1 histone H2B-like [Oncorhynchus mykiss];XP_021451437.1 histone H2B-like [Oncorhynchus mykiss]	110870000	34244000	40318000	33474000	101050000	61598000	41910000	87764000	24111000	32182000	74768000	51164000	107050000	62746000	10726000	190890000	85249000	37701000	18692000	10994000	49164000	21721000	28554000	24680000	12207000	27039000	50421000	26214000	49854000	21983000	28484000	13207000	41682000	28420000	22984000	28408000	80490000	56745000	0	29092000	574810000	0	25008000	29656000	8522300	88301000	66966000
XP_021480531.1	XP_021480531.1	XP_021480531.1 complement C1q-like protein 2 [Oncorhynchus mykiss]	61754000	57585000	57789000	53278000	50822000	53828000	50897000	47736000	44234000	44597000	90623000	64894000	65826000	75553000	83599000	75064000	103090000	82323000	82374000	68425000	50809000	67026000	52728000	49875000	56781000	45841000	54798000	47128000	39499000	31753000	40576000	42919000	39319000	41083000	45924000	50977000	39507000	47931000	42879000	32191000	47599000	38682000	27976000	24795000	34372000	28147000	25798000
XP_021425936.1;XP_021425935.1;XP_021425954.1	XP_021425936.1;XP_021425935.1;XP_021425954.1	XP_021425936.1 complement C3-like isoform X2 [Oncorhynchus mykiss];XP_021425935.1 complement C3-like isoform X1 [Oncorhynchus mykiss];XP_021425954.1 A.superbus venom factor 2-like [Oncorhynchus mykiss]	71327000	77938000	84469000	82948000	113190000	123050000	126160000	102730000	90007000	91314000	158970000	101460000	140390000	133100000	146280000	153090000	217510000	150590000	136750000	125200000	85975000	80209000	77516000	81661000	99696000	95798000	104440000	103980000	98548000	97272000	96494000	99974000	98201000	103570000	115630000	123760000	98217000	113760000	88278000	73391000	78817000	73453000	75040000	76228000	77476000	94652000	92987000
XP_021434023.1;XP_021470206.1;XP_021470205.1;XP_021434022.1;XP_021450829.1	XP_021434023.1;XP_021470206.1;XP_021470205.1;XP_021434022.1	XP_021434023.1 beta-enolase-like isoform X2 [Oncorhynchus mykiss];XP_021470206.1 beta-enolase isoform X2 [Oncorhynchus mykiss];XP_021470205.1 beta-enolase isoform X1 [Oncorhynchus mykiss];XP_021434022.1 beta-enolase-like isoform X1 [Oncorhynchus mykiss]	235230000	266010000	174980000	222830000	131650000	134540000	116540000	52203000	62977000	55229000	141430000	381900000	195000000	184750000	126940000	73731000	0	30854000	21053000	177420000	126280000	120260000	69584000	59149000	77069000	55680000	185050000	121700000	163010000	113160000	21684000	56915000	33568000	148060000	40239000	39849000	42975000	37951000	22880000	64799000	185000000	54876000	48520000	66466000	92372000	57556000	145440000
XP_021434199.1	XP_021434199.1	XP_021434199.1 immunoglobulin lambda-1 light chain-like, partial [Oncorhynchus mykiss]	134780000	133880000	121840000	106460000	108350000	127760000	136780000	200200000	222350000	312770000	158570000	156270000	119620000	124270000	125770000	111420000	217220000	188000000	215970000	189400000	216800000	211950000	162740000	133560000	147200000	135690000	151670000	197390000	245610000	187660000	46255000	46510000	33806000	32354000	43065000	52509000	54841000	135360000	175520000	139450000	109620000	123150000	94958000	84018000	106960000	119400000	123700000
XP_021427651.1;XP_021427650.1;XP_021427649.1	XP_021427651.1;XP_021427650.1;XP_021427649.1	XP_021427651.1 ladderlectin isoform X3 [Oncorhynchus mykiss];XP_021427650.1 ladderlectin isoform X2 [Oncorhynchus mykiss];XP_021427649.1 ladderlectin isoform X1 [Oncorhynchus mykiss]	62410000	42633000	40721000	41676000	42565000	38018000	35621000	38363000	38991000	41195000	76002000	73978000	69842000	74628000	68519000	63179000	22858000	80986000	80920000	70435000	171980000	169540000	135050000	120240000	137300000	106050000	109980000	93662000	87998000	68559000	126040000	110350000	110560000	112690000	143210000	136510000	123440000	155160000	139710000	104160000	101490000	104950000	98180000	94487000	93578000	106390000	96198000
XP_021476748.1;XP_021476747.1;XP_021476746.1;XP_021476745.1;XP_021476740.1;XP_021476744.1;XP_021476743.1;XP_021476741.1;XP_021476739.1;XP_021476736.1;XP_021476749.1;XP_021476738.1;XP_021476737.1	XP_021476748.1;XP_021476747.1;XP_021476746.1;XP_021476745.1;XP_021476740.1;XP_021476744.1;XP_021476743.1;XP_021476741.1;XP_021476739.1;XP_021476736.1;XP_021476749.1;XP_021476738.1;XP_021476737.1	XP_021476748.1 alpha-1-antitrypsin-like isoform X12 [Oncorhynchus mykiss];XP_021476747.1 alpha-1-antitrypsin-like isoform X11 [Oncorhynchus mykiss];XP_021476746.1 alpha-1-antitrypsin-like isoform X10 [Oncorhynchus mykiss];XP_021476745.1 alpha-1-antitrypsin-like isoform X9 [Oncorhynchus mykiss];XP_021476740.1 alpha-1-antitrypsin-like isoform X5 [Oncorhynchus mykiss];XP_021476744.1 alpha-1-antitryp…	298130000	228950000	208980000	165700000	163430000	192850000	176410000	153830000	154620000	185680000	317360000	331170000	222570000	188490000	204320000	162890000	33414000	262130000	233910000	240390000	10608000	11928000	12358000	18014000	19813000	8316400	6408500	10849000	8055200	15186000	29223000	23279000	38944000	60481000	44695000	22820000	45088000	29634000	23500000	24329000	47804000	33100000	27912000	39358000	54018000	21156000	21386000
XP_021425750.1	XP_021425750.1	XP_021425750.1 cholesteryl ester transfer protein [Oncorhynchus mykiss]	88604000	82079000	77944000	65332000	67650000	61689000	57590000	57468000	65622000	66485000	102320000	98193000	87330000	91477000	80049000	73526000	129790000	91650000	97660000	92629000	107140000	107380000	105570000	95654000	103460000	87773000	80036000	64373000	75664000	60644000	122610000	119260000	123620000	112060000	112600000	126180000	115800000	141100000	128070000	96682000	94521000	82057000	83416000	79582000	112450000	81552000	86430000
XP_021473834.1;XP_021479124.1;XP_021479123.1;XP_021479122.1	XP_021473834.1	XP_021473834.1 pigment epithelium-derived factor-like [Oncorhynchus mykiss]	90701000	69974000	72207000	60982000	67279000	72535000	60020000	71550000	66478000	65964000	82398000	69713000	63391000	57812000	65646000	77231000	44506000	65460000	68197000	62859000	85443000	93615000	72687000	60706000	81624000	61448000	69098000	77934000	73856000	75031000	93451000	79246000	83657000	86575000	91310000	94982000	90773000	104960000	89066000	78944000	95932000	90681000	74242000	71805000	83529000	73308000	74320000
XP_021443502.1	XP_021443502.1	XP_021443502.1 vitronectin-like [Oncorhynchus mykiss]	74322000	62438000	55048000	48019000	48384000	52962000	57785000	63565000	52160000	56641000	71167000	69534000	55238000	54984000	55289000	55413000	94384000	65630000	61885000	60890000	82224000	83978000	64876000	60490000	52632000	54863000	58490000	61321000	65283000	62004000	67190000	66727000	57352000	65688000	84161000	71547000	60828000	72968000	75977000	70557000	65226000	77931000	63061000	57473000	73499000	58533000	60667000
XP_021434083.1	XP_021434083.1	XP_021434083.1 calcium/calmodulin-dependent protein kinase type II delta 1 chain-like [Oncorhynchus mykiss]	100450000	95872000	96228000	94021000	80817000	60683000	71517000	73169000	71197000	67027000	69395000	67445000	76957000	68825000	69668000	74731000	71827000	64357000	82312000	60737000	124030000	134570000	121900000	100340000	93574000	82950000	97248000	77496000	67680000	59141000	104030000	98166000	116320000	106900000	112010000	120140000	92297000	113690000	99210000	66254000	119900000	95511000	108820000	96500000	97446000	102510000	95614000
CDQ89439.1;ABR26804.1;ABR15686.1;ABR15646.1;ABR15630.1;ABR15622.1;ABR15583.1;ABR15571.1;ABR27028.1;ABR27026.1;ABR27004.1;ABR26857.1;ABR15546.1;ABR15538.1;ABR15537.1;ABR26789.1;ABR26841.1;ABR27083.1;ABR27175.1;ABR27172.1;ABR27169.1;ABR27165.1;ABR27164.1;ABR27163.1;ABR27161.1;ABR27160.1;ABR27156.1;ABR27155.1;ABR27154.1;ABR27153.1;ABR27152.1;ABR27151.1;ABR27150.1;ABR27149.1;ABR27147.1;ABR27138.1;ABR…	CDQ89439.1;ABR26804.1;ABR15686.1;ABR15646.1;ABR15630.1;ABR15622.1;ABR15583.1;ABR15571.1;ABR27028.1;ABR27026.1;ABR27004.1;ABR26857.1;ABR15546.1;ABR15538.1;ABR15537.1;ABR26789.1;ABR26841.1;ABR27083.1;ABR27175.1;ABR27172.1;ABR27169.1;ABR27165.1;ABR27164.1;ABR27163.1;ABR27161.1;ABR27160.1;ABR27156.1;ABR27155.1;ABR27154.1;ABR27153.1;ABR27152.1;ABR27151.1;ABR27150.1;ABR27149.1;ABR27147.1;ABR27138.1;ABR…	CDQ89439.1 unnamed protein product [Oncorhynchus mykiss];ABR26804.1 immunoglobulin mu heavy chain, partial [Oncorhynchus mykiss];ABR15686.1 immunoglobulin mu heavy chain, partial [Oncorhynchus mykiss];ABR15646.1 immunoglobulin mu heavy chain, partial [Oncorhynchus mykiss];ABR15630.1 immunoglobulin mu heavy chain, partial [Oncorhynchus mykiss];ABR15622.1 immunoglobulin mu heavy chain, partial [Onc…	33172000	35328000	36393000	32958000	25831000	37145000	41944000	51535000	61462000	55667000	23678000	22383000	21780000	17107000	0	15481000	21574000	17578000	0	21680000	27514000	29173000	25705000	17172000	14656000	13536000	19001000	23395000	17409000	19037000	29271000	20334000	32666000	26334000	28842000	41343000	49882000	93327000	82833000	59488000	66164000	75509000	62399000	61322000	71096000	61728000	75831000
XP_021465270.1;XP_021465271.1	XP_021465270.1;XP_021465271.1	XP_021465270.1 inter-alpha-trypsin inhibitor heavy chain H3-like isoform X1 [Oncorhynchus mykiss];XP_021465271.1 inter-alpha-trypsin inhibitor heavy chain H3-like isoform X2 [Oncorhynchus mykiss]	229360000	208110000	212820000	215150000	245430000	252820000	251360000	222670000	187350000	220460000	84306000	85055000	86329000	111200000	137630000	112110000	91805000	87569000	90503000	129410000	215700000	268260000	233920000	237500000	273020000	233370000	223520000	232670000	238740000	225510000	193930000	223470000	215060000	228770000	312620000	240470000	184660000	184130000	207220000	208880000	212490000	298050000	286650000	236910000	265340000	236630000	212190000
XP_021421393.1;XP_021421391.1;XP_021421388.1;XP_021421387.1;XP_021421386.1	XP_021421393.1;XP_021421391.1;XP_021421388.1;XP_021421387.1;XP_021421386.1	XP_021421393.1 beta-2-microglobulin-like [Oncorhynchus mykiss];XP_021421391.1 beta-2-microglobulin-like [Oncorhynchus mykiss];XP_021421388.1 beta-2-microglobulin-like isoform X2 [Oncorhynchus mykiss];XP_021421387.1 beta-2-microglobulin-like isoform X2 [Oncorhynchus mykiss];XP_021421386.1 beta-2-microglobulin-like isoform X1 [Oncorhynchus mykiss]	195360000	195380000	167430000	165020000	156240000	148680000	191480000	215660000	187240000	98854000	138890000	134140000	125250000	89391000	128260000	166180000	41698000	136270000	172800000	101040000	88624000	129190000	134760000	86593000	76394000	125340000	129390000	108110000	117340000	86983000	139810000	147670000	162900000	155750000	157280000	209010000	195960000	242870000	213880000	150380000	156700000	163730000	150720000	124760000	147850000	133500000	117340000
ABR26816.1;ABF50728.1;ABR26817.1;ABR15578.1;ABR26798.1;ABR26796.1;ABR26795.1;ABR15640.1	ABR26816.1;ABF50728.1;ABR26817.1;ABR15578.1;ABR26798.1;ABR26796.1;ABR26795.1;ABR15640.1	ABR26816.1 immunoglobulin mu heavy chain, partial [Oncorhynchus mykiss];ABF50728.1 immunoglobulin mu heavy chain, partial [Oncorhynchus mykiss];ABR26817.1 immunoglobulin mu heavy chain, partial [Oncorhynchus mykiss];ABR15578.1 immunoglobulin mu heavy chain, partial [Oncorhynchus mykiss];ABR26798.1 immunoglobulin mu heavy chain, partial [Oncorhynchus mykiss];ABR26796.1 immunoglobulin mu heavy chai…	74077000	65909000	75601000	56681000	68818000	79801000	122360000	271940000	354080000	350350000	48954000	55734000	49712000	45754000	43493000	41184000	75840000	73878000	90668000	79681000	0	34932000	16387000	17736000	19046000	27649000	42674000	74227000	92180000	51752000	29278000	35435000	29280000	0	0	63153000	115640000	216440000	221420000	132660000	80149000	63683000	60891000	51763000	53796000	58512000	57156000
[truncated: 155 more rows]
[truncated: 13 more columns]

## Sheet: Table S3 - ANOVA stats
	Accession	Product	p-value	Corrected p-value	F	R2
	XP_021453338.1	XP_021453338.1 apolipoprotein A-I-like [Oncorhynchus mykiss]	0	0	14.82	72.73
[truncated: 277 more rows]

## Sheet: Table S4. STRING
Reactome pathway	Term description	Observed gene count	Background gene count	False discovery rate	Human orthologs in network
[truncated: 146 more rows]

[truncated: 3 more sheets: Table S5 - Duplicates_1, Table S6 - Duplicates_2, Table S7 - Uncharacterized prot]
